# Supplementary material for: Adverse Events Associated with Busulfan in HSCT Pre-Transplant Conditioning: A Retrospective Pharmacovigilance Study of the FAERS Database
Source: Research Square preprint supplement (doi:10.21203/rs.3.rs-6454932/v1), 2025-05-29
Supplement: Supplementary file 1 [file 05bd119a81180dff9c2572d6.xlsx]

## Sheet: Supplementary Table 4
SOC	PT	a	b	c	d	ROR(95% Cl)			Target adverse drug event with agalsidase beta	Other adverse drug events with agalsidase beta	Sums
Injury, Poisoning And Procedural Complications	Product Use In Unapproved Indication	214	3505	347	4614	0.81(0.68-0.97)		Females	a	b	a+b
Hepatobiliary Disorders	Venoocclusive Liver Disease	61	3658	99	4862	0.82(0.59-1.13)		Males	c	d	c+d
Infections And Infestations	Cytomegalovirus Infection Reactivation	51	3668	64	4897	1.06(0.73-1.54)		Sums	a+c	b+d	a+b+c+d
Injury, Poisoning And Procedural Complications	Off Label Use	48	3671	91	4870	0.7(0.49-1)
Gastrointestinal Disorders	Stomatitis	48	3671	57	4904	1.12(0.76-1.66)
Infections And Infestations	Cytomegalovirus Infection	48	3671	100	4861	0.64(0.45-0.9)
General Disorders And Administration Site Conditions	Pyrexia	46	3673	31	4930	1.99(1.26-3.15)
General Disorders And Administration Site Conditions	Mucosal Inflammation	43	3676	107	4854	0.53(0.37-0.76)
Blood And Lymphatic System Disorders	Thrombotic Microangiopathy	42	3677	56	4905	1(0.67-1.5)
Blood And Lymphatic System Disorders	Febrile Neutropenia	40	3679	74	4887	0.72(0.49-1.06)
Gastrointestinal Disorders	Diarrhoea	38	3681	55	4906	0.92(0.61-1.4)
Infections And Infestations	Sepsis	37	3682	60	4901	0.82(0.54-1.24)
Renal And Urinary Disorders	Cystitis Haemorrhagic	37	3682	55	4906	0.9(0.59-1.36)
Respiratory, Thoracic And Mediastinal Disorders	Respiratory Failure	37	3682	59	4902	0.83(0.55-1.26)
Infections And Infestations	Cytomegalovirus Viraemia	36	3683	38	4923	1.27(0.8-2)
Immune System Disorders	Graft Versus Host Disease	35	3684	57	4904	0.82(0.54-1.25)
Infections And Infestations	Pneumonia	31	3688	53	4908	0.78(0.5-1.21)
Gastrointestinal Disorders	Nausea	29	3690	42	4919	0.92(0.57-1.48)
Blood And Lymphatic System Disorders	Neutropenia	28	3691	29	4932	1.29(0.77-2.17)
Vascular Disorders	Venoocclusive Disease	28	3691	47	4914	0.79(0.5-1.27)
Immune System Disorders	Acute Graft Versus Host Disease	27	3692	51	4910	0.7(0.44-1.12)
General Disorders And Administration Site Conditions	Drug Ineffective	26	3693	23	4938	1.51(0.86-2.65)
Blood And Lymphatic System Disorders	Thrombocytopenia	26	3693	39	4922	0.89(0.54-1.46)
Renal And Urinary Disorders	Acute Kidney Injury	24	3695	32	4929	1(0.59-1.7)
Immune System Disorders	Haemophagocytic Lymphohistiocytosis	24	3695	21	4940	1.53(0.85-2.75)
General Disorders And Administration Site Conditions	Multiple Organ Dysfunction Syndrome	24	3695	38	4923	0.84(0.5-1.41)
Blood And Lymphatic System Disorders	Pancytopenia	23	3696	19	4942	1.62(0.88-2.98)
Neoplasms Benign, Malignant And Unspecified (Incl Cysts And Polyps)	Post Transplant Lymphoproliferative Disorder	23	3696	25	4936	1.23(0.7-2.17)
Gastrointestinal Disorders	Vomiting	22	3697	25	4936	1.17(0.66-2.09)
Infections And Infestations	Viral Haemorrhagic Cystitis	22	3697	14	4947	2.1(1.07-4.12)
Infections And Infestations	Bacteraemia	22	3697	19	4942	1.55(0.84-2.86)
Respiratory, Thoracic And Mediastinal Disorders	Pleural Effusion	21	3698	15	4946	1.87(0.96-3.64)
Investigations	Blood Follicle Stimulating Hormone Increased	21	3698	3	4958	9.39(2.8-31.49)
Respiratory, Thoracic And Mediastinal Disorders	Dyspnoea	20	3699	11	4950	2.43(1.16-5.08)
Immune System Disorders	Graft Versus Host Disease In Skin	20	3699	15	4946	1.78(0.91-3.49)
Infections And Infestations	Septic Shock	20	3699	25	4936	1.07(0.59-1.92)
Infections And Infestations	Staphylococcal Infection	20	3699	14	4947	1.91(0.96-3.79)
Injury, Poisoning And Procedural Complications	Toxicity To Various Agents	20	3699	1	4960	26.82(3.6-199.92)
Infections And Infestations	Adenovirus Infection	19	3700	19	4942	1.34(0.71-2.53)
Infections And Infestations	Bk Virus Infection	19	3700	40	4921	0.63(0.37-1.09)
Investigations	Blood Luteinising Hormone Increased	19	3700	3	4958	8.49(2.51-28.7)
Respiratory, Thoracic And Mediastinal Disorders	Acute Respiratory Distress Syndrome	18	3701	16	4945	1.5(0.77-2.95)
Respiratory, Thoracic And Mediastinal Disorders	Pulmonary Hypertension	17	3702	11	4950	2.07(0.97-4.42)
Immune System Disorders	Chronic Graft Versus Host Disease	16	3703	17	4944	1.26(0.63-2.49)
Gastrointestinal Disorders	Ascites	16	3703	16	4945	1.34(0.67-2.67)
Immune System Disorders	Graft Versus Host Disease In Gastrointestinal Tract	16	3703	16	4945	1.34(0.67-2.67)
Nervous System Disorders	Posterior Reversible Encephalopathy Syndrome	16	3703	9	4952	2.38(1.05-5.39)
Renal And Urinary Disorders	Renal Impairment	16	3703	14	4947	1.53(0.74-3.13)
Infections And Infestations	Polyomavirus Viraemia	16	3703	15	4946	1.42(0.7-2.89)
Renal And Urinary Disorders	Renal Failure	15	3704	29	4932	0.69(0.37-1.29)
