# Supplementary material for: Adverse Events Associated with Busulfan in HSCT Pre-Transplant Conditioning: A Retrospective Pharmacovigilance Study of the FAERS Database
Source: Research Square preprint supplement (doi:10.21203/rs.3.rs-6454932/v1), 2025-05-29
Supplement: Supplementary file 2 [file 285a81de6e8b87b7691e3341.xlsx]

## Sheet: sheet1
PT	SOC	Reported cases(a)	ROR(95%Cl)	PRR(χ2)	EBGM(EBGM05)	IC(IC025)
Product Use In Unapproved Indication	Injury, Poisoning And Procedural Complications	707	4.51 ( 4.15 - 4.91 )	4.3 ( 1456.17 )	3.64 ( 3.39 )	1.86 ( 1.74 )
Venoocclusive Liver Disease	Hepatobiliary Disorders	261	5.12 ( 4.45 - 5.88 )	5.03 ( 655.34 )	4.12 ( 3.66 )	2.04 ( 1.84 )
Mucosal Inflammation	General Disorders And Administration Site Conditions	217	3.11 ( 2.68 - 3.59 )	3.07 ( 258.3 )	2.75 ( 2.44 )	1.46 ( 1.25 )
Cytomegalovirus Infection Reactivation	Infections And Infestations	153	3.98 ( 3.34 - 4.75 )	3.94 ( 274.29 )	3.39 ( 2.93 )	1.76 ( 1.51 )
Cystitis Haemorrhagic	Renal And Urinary Disorders	138	3.05 ( 2.54 - 3.66 )	3.03 ( 159.88 )	2.72 ( 2.34 )	1.45 ( 1.18 )
Stomatitis	Gastrointestinal Disorders	118	3.52 ( 2.89 - 4.3 )	3.5 ( 175.59 )	3.08 ( 2.61 )	1.62 ( 1.33 )
Venoocclusive Disease	Vascular Disorders	118	3.94 ( 3.22 - 4.81 )	3.91 ( 208.77 )	3.37 ( 2.85 )	1.75 ( 1.46 )
Haemophagocytic Lymphohistiocytosis	Immune System Disorders	57	4.13 ( 3.09 - 5.52 )	4.11 ( 108.66 )	3.51 ( 2.76 )	1.81 ( 1.4 )
Aplastic Anaemia	Blood And Lymphatic System Disorders	43	3.61 ( 2.6 - 5.02 )	3.6 ( 66.92 )	3.15 ( 2.39 )	1.66 ( 1.18 )
Epstein-Barr Virus Infection Reactivation	Infections And Infestations	43	4.13 ( 2.96 - 5.77 )	4.12 ( 82.14 )	3.52 ( 2.66 )	1.82 ( 1.34 )
Autoimmune Haemolytic Anaemia	Blood And Lymphatic System Disorders	40	6.72 ( 4.66 - 9.69 )	6.7 ( 139.8 )	5.11 ( 3.76 )	2.35 ( 1.84 )
Pulmonary Hypertension	Respiratory, Thoracic And Mediastinal Disorders	40	4.58 ( 3.23 - 6.5 )	4.57 ( 88.27 )	3.82 ( 2.85 )	1.93 ( 1.44 )
Pulmonary Haemorrhage	Respiratory, Thoracic And Mediastinal Disorders	37	3.33 ( 2.34 - 4.74 )	3.32 ( 50.48 )	2.95 ( 2.2 )	1.56 ( 1.05 )
No Adverse Event	General Disorders And Administration Site Conditions	33	4.2 ( 2.87 - 6.14 )	4.19 ( 64.45 )	3.56 ( 2.59 )	1.83 ( 1.29 )
Obliterative Bronchiolitis	Respiratory, Thoracic And Mediastinal Disorders	33	3.15 ( 2.17 - 4.57 )	3.15 ( 40.89 )	2.81 ( 2.06 )	1.49 ( 0.96 )
Polyomavirus Viraemia	Infections And Infestations	31	3.46 ( 2.35 - 5.09 )	3.45 ( 45 )	3.04 ( 2.2 )	1.61 ( 1.05 )
Product Administered To Patient Of Inappropriate Age	Injury, Poisoning And Procedural Complications	28	6.21 ( 4.03 - 9.56 )	6.19 ( 89.76 )	4.82 ( 3.36 )	2.27 ( 1.66 )
Incorrect Product Administration Duration	Injury, Poisoning And Procedural Complications	26	56.19 ( 25.44 - 124.15 )	56.07 ( 330.94 )	13.96 ( 7.19 )	3.8 ( 3.06 )
Ovarian Failure	Reproductive System And Breast Disorders	24	11.85 ( 7.05 - 19.93 )	11.83 ( 141.2 )	7.42 ( 4.81 )	2.89 ( 2.21 )
Blood Follicle Stimulating Hormone Increased	Investigations	24	18.86 ( 10.57 - 33.64 )	18.82 ( 193.72 )	9.52 ( 5.87 )	3.25 ( 2.54 )
Idiopathic Pneumonia Syndrome	Respiratory, Thoracic And Mediastinal Disorders	23	4.57 ( 2.88 - 7.24 )	4.56 ( 50.6 )	3.82 ( 2.6 )	1.93 ( 1.28 )
Blood Luteinising Hormone Increased	Investigations	22	25.35 ( 13.15 - 48.88 )	25.3 ( 208.23 )	10.85 ( 6.27 )	3.44 ( 2.68 )
Stenotrophomonas Infection	Infections And Infestations	20	3.6 ( 2.22 - 5.83 )	3.59 ( 31.01 )	3.15 ( 2.1 )	1.65 ( 0.97 )
Haemorrhage Intracranial	Nervous System Disorders	20	3.53 ( 2.18 - 5.7 )	3.52 ( 30 )	3.09 ( 2.07 )	1.63 ( 0.95 )
Bone Marrow Transplant	Surgical And Medical Procedures	20	3.93 ( 2.42 - 6.38 )	3.92 ( 35.48 )	3.38 ( 2.25 )	1.76 ( 1.07 )
Ovarian Atrophy	Reproductive System And Breast Disorders	20	115.21 ( 34.23 - 387.78 )	115.01 ( 294.87 )	15.87 ( 5.75 )	3.99 ( 3.13 )
Transplantation Complication	Injury, Poisoning And Procedural Complications	19	10.94 ( 6.16 - 19.45 )	10.93 ( 104.93 )	7.08 ( 4.37 )	2.82 ( 2.06 )
Premature Menopause	Reproductive System And Breast Disorders	19	13.13 ( 7.23 - 23.85 )	13.11 ( 120.8 )	7.88 ( 4.78 )	2.98 ( 2.2 )
Hypothyroidism	Endocrine Disorders	18	4.32 ( 2.58 - 7.24 )	4.31 ( 36.66 )	3.65 ( 2.37 )	1.87 ( 1.14 )
Drug Effective For Unapproved Indication	General Disorders And Administration Site Conditions	17	3.67 ( 2.17 - 6.2 )	3.67 ( 27.2 )	3.2 ( 2.06 )	1.68 ( 0.94 )
Immune Thrombocytopenia	Blood And Lymphatic System Disorders	17	3.97 ( 2.34 - 6.72 )	3.96 ( 30.64 )	3.41 ( 2.19 )	1.77 ( 1.03 )
Right Ventricular Failure	Cardiac Disorders	17	8.9 ( 4.96 - 15.98 )	8.89 ( 78.56 )	6.21 ( 3.8 )	2.63 ( 1.84 )
Inappropriate Schedule Of Product Administration	Injury, Poisoning And Procedural Complications	16	7.27 ( 4.05 - 13.05 )	7.26 ( 60.83 )	5.41 ( 3.32 )	2.44 ( 1.63 )
Human Herpesvirus 6 Encephalitis	Infections And Infestations	16	6.14 ( 3.47 - 10.87 )	6.13 ( 50.73 )	4.79 ( 2.97 )	2.26 ( 1.47 )
Toxic Skin Eruption	Skin And Subcutaneous Tissue Disorders	15	7.4 ( 4.04 - 13.56 )	7.39 ( 58.07 )	5.48 ( 3.3 )	2.45 ( 1.63 )
Pulmonary Veno-Occlusive Disease	Respiratory, Thoracic And Mediastinal Disorders	15	9.25 ( 4.94 - 17.33 )	9.24 ( 71.81 )	6.37 ( 3.77 )	2.67 ( 1.83 )
Enterococcal Bacteraemia	Infections And Infestations	13	3.87 ( 2.12 - 7.06 )	3.87 ( 22.58 )	3.34 ( 2.02 )	1.74 ( 0.9 )
Primary Hypogonadism	Endocrine Disorders	13	8.31 ( 4.29 - 16.12 )	8.31 ( 56.41 )	5.93 ( 3.41 )	2.57 ( 1.67 )
Bronchiolitis Obliterans Syndrome	Respiratory, Thoracic And Mediastinal Disorders	13	11.82 ( 5.83 - 23.93 )	11.8 ( 76.34 )	7.41 ( 4.11 )	2.89 ( 1.97 )
Mucosal Disorder	General Disorders And Administration Site Conditions	12	23.03 ( 9.7 - 54.66 )	23 ( 108.25 )	10.43 ( 5.06 )	3.38 ( 2.37 )
Rectal Haemorrhage	Gastrointestinal Disorders	12	5.76 ( 2.99 - 11.07 )	5.75 ( 35.33 )	4.56 ( 2.64 )	2.19 ( 1.29 )
Evans Syndrome	Blood And Lymphatic System Disorders	10	10.79 ( 4.9 - 23.78 )	10.78 ( 54.62 )	7.02 ( 3.62 )	2.81 ( 1.78 )
Skin Hyperpigmentation	Skin And Subcutaneous Tissue Disorders	10	5.08 ( 2.51 - 10.28 )	5.07 ( 25.28 )	4.15 ( 2.3 )	2.05 ( 1.08 )
Escherichia Test Positive	Investigations	10	13.28 ( 5.82 - 30.3 )	13.27 ( 64.14 )	7.94 ( 3.98 )	2.99 ( 1.94 )
Viruria	Infections And Infestations	10	4.21 ( 2.11 - 8.41 )	4.21 ( 19.66 )	3.58 ( 2.01 )	1.84 ( 0.88 )
Enterobacter Bacteraemia	Infections And Infestations	9	11.1 ( 4.8 - 25.65 )	11.09 ( 50.3 )	7.14 ( 3.54 )	2.84 ( 1.75 )
Staphylococcus Test Positive	Investigations	8	7.67 ( 3.34 - 17.65 )	7.67 ( 32.12 )	5.62 ( 2.8 )	2.49 ( 1.38 )
Hilar Lymphadenopathy	Blood And Lymphatic System Disorders	8	15.35 ( 5.92 - 39.78 )	15.34 ( 56.76 )	8.59 ( 3.87 )	3.1 ( 1.92 )
Lymphadenopathy Mediastinal	Blood And Lymphatic System Disorders	8	7.67 ( 3.34 - 17.65 )	7.67 ( 32.12 )	5.62 ( 2.8 )	2.49 ( 1.38 )
Pericarditis Constrictive	Cardiac Disorders	7	6.71 ( 2.8 - 16.07 )	6.71 ( 24.49 )	5.11 ( 2.46 )	2.35 ( 1.19 )
Meningitis Tuberculous	Infections And Infestations	7	5.25 ( 2.25 - 12.24 )	5.25 ( 18.47 )	4.26 ( 2.1 )	2.09 ( 0.95 )
Laryngitis Fungal	Infections And Infestations	7	7.11 ( 2.95 - 17.14 )	7.1 ( 26.01 )	5.32 ( 2.55 )	2.41 ( 1.24 )
Product Administration Error	Injury, Poisoning And Procedural Complications	7	6.71 ( 2.8 - 16.07 )	6.71 ( 24.49 )	5.11 ( 2.46 )	2.35 ( 1.19 )
Growth Hormone Deficiency	Endocrine Disorders	7	10.07 ( 3.96 - 25.58 )	10.06 ( 36.09 )	6.72 ( 3.08 )	2.75 ( 1.54 )
Cardiac Dysfunction	Cardiac Disorders	7	15.1 ( 5.48 - 41.66 )	15.1 ( 49.14 )	8.52 ( 3.64 )	3.09 ( 1.84 )
Cytomegalovirus Urinary Tract Infection	Infections And Infestations	7	9.29 ( 3.71 - 23.3 )	9.29 ( 33.66 )	6.39 ( 2.96 )	2.68 ( 1.48 )
Diarrhoea Infectious	Infections And Infestations	6	5.45 ( 2.18 - 13.65 )	5.45 ( 16.56 )	4.38 ( 2.03 )	2.13 ( 0.9 )
Lung Transplant	Surgical And Medical Procedures	6	14.79 ( 4.97 - 44.03 )	14.79 ( 41.53 )	8.42 ( 3.38 )	3.07 ( 1.74 )
Adrenal Haemorrhage	Endocrine Disorders	6	20.71 ( 6.32 - 67.88 )	20.7 ( 51.14 )	9.96 ( 3.69 )	3.32 ( 1.94 )
Neutrophil Count Abnormal	Investigations	6	25.89 ( 7.31 - 91.76 )	25.88 ( 57.4 )	10.95 ( 3.8 )	3.45 ( 2.06 )
Disseminated Bacillus Calmette-Guerin Infection	Infections And Infestations	6	5.75 ( 2.28 - 14.5 )	5.75 ( 17.66 )	4.56 ( 2.11 )	2.19 ( 0.96 )
Stenotrophomonas Bacteraemia	Infections And Infestations	6	51.78 ( 10.45 - 256.6 )	51.76 ( 74.67 )	13.69 ( 3.59 )	3.77 ( 2.32 )
Tooth Hypoplasia	Congenital, Familial And Genetic Disorders	5	8.63 ( 2.95 - 25.25 )	8.63 ( 22.47 )	6.08 ( 2.48 )	2.61 ( 1.22 )
Traumatic Lung Injury	Injury, Poisoning And Procedural Complications	5	12.33 ( 3.91 - 38.85 )	12.32 ( 30.35 )	7.61 ( 2.91 )	2.93 ( 1.5 )
Upper Respiratory Fungal Infection	Infections And Infestations	5	7.84 ( 2.73 - 22.58 )	7.84 ( 20.52 )	5.7 ( 2.35 )	2.51 ( 1.14 )
Catheter Site Infection	Infections And Infestations	5	6.64 ( 2.37 - 18.62 )	6.64 ( 17.28 )	5.07 ( 2.14 )	2.34 ( 0.99 )
Cortisol Decreased	Investigations	5	17.26 ( 5 - 59.63 )	17.25 ( 38.28 )	9.13 ( 3.23 )	3.19 ( 1.73 )
Herpes Zoster Infection Neurological	Infections And Infestations	5	9.59 ( 3.21 - 28.62 )	9.58 ( 24.72 )	6.52 ( 2.61 )	2.7 ( 1.31 )
Cervical Dysplasia	Reproductive System And Breast Disorders	5	7.84 ( 2.73 - 22.58 )	7.84 ( 20.52 )	5.7 ( 2.35 )	2.51 ( 1.14 )
Thyroiditis	Endocrine Disorders	5	7.84 ( 2.73 - 22.58 )	7.84 ( 20.52 )	5.7 ( 2.35 )	2.51 ( 1.14 )
Large Granular Lymphocytosis	Neoplasms Benign, Malignant And Unspecified (Incl Cysts And Polyps)	5	17.26 ( 5 - 59.63 )	17.25 ( 38.28 )	9.13 ( 3.23 )	3.19 ( 1.73 )
Platelet Transfusion	Surgical And Medical Procedures	5	7.19 ( 2.53 - 20.42 )	7.19 ( 18.8 )	5.37 ( 2.24 )	2.42 ( 1.06 )
Hyperfibrinogenaemia	Blood And Lymphatic System Disorders	5	17.26 ( 5 - 59.63 )	17.25 ( 38.28 )	9.13 ( 3.23 )	3.19 ( 1.73 )
Retinopathy Haemorrhagic	Eye Disorders	5	14.38 ( 4.39 - 47.13 )	14.38 ( 33.95 )	8.3 ( 3.07 )	3.05 ( 1.61 )
Tooth Development Disorder	Gastrointestinal Disorders	4	23.01 ( 5.15 - 102.83 )	23 ( 36.08 )	10.43 ( 2.98 )	3.38 ( 1.74 )
Adenosquamous Cell Lung Cancer	Neoplasms Benign, Malignant And Unspecified (Incl Cysts And Polyps)	4	23.01 ( 5.15 - 102.83 )	23 ( 36.08 )	10.43 ( 2.98 )	3.38 ( 1.74 )
Citrobacter Bacteraemia	Infections And Infestations	4	11.51 ( 3.25 - 40.78 )	11.5 ( 23.01 )	7.3 ( 2.53 )	2.87 ( 1.31 )
Meningitis Enterococcal	Infections And Infestations	4	8.63 ( 2.6 - 28.66 )	8.63 ( 17.98 )	6.08 ( 2.23 )	2.61 ( 1.09 )
Polyserositis	General Disorders And Administration Site Conditions	4	17.26 ( 4.32 - 69.01 )	17.25 ( 30.62 )	9.13 ( 2.86 )	3.19 ( 1.58 )
Non-Cirrhotic Portal Hypertension	Hepatobiliary Disorders	4	23.01 ( 5.15 - 102.83 )	23 ( 36.08 )	10.43 ( 2.98 )	3.38 ( 1.74 )
Pleural Thickening	Respiratory, Thoracic And Mediastinal Disorders	4	9.86 ( 2.89 - 33.69 )	9.86 ( 20.26 )	6.64 ( 2.37 )	2.73 ( 1.19 )
Autoimmune Pancytopenia	Blood And Lymphatic System Disorders	4	13.81 ( 3.71 - 51.42 )	13.8 ( 26.39 )	8.11 ( 2.7 )	3.02 ( 1.44 )
Bladder Tamponade	Renal And Urinary Disorders	4	11.51 ( 3.25 - 40.78 )	11.5 ( 23.01 )	7.3 ( 2.53 )	2.87 ( 1.31 )
Actinomycotic Sepsis	Infections And Infestations	4	9.86 ( 2.89 - 33.69 )	9.86 ( 20.26 )	6.64 ( 2.37 )	2.73 ( 1.19 )
Neuropsychiatric Syndrome	Psychiatric Disorders	4	69.03 ( 7.71 - 617.7 )	69.01 ( 53.62 )	14.6 ( 2.33 )	3.87 ( 2.12 )
Sepsis Syndrome	Infections And Infestations	3	10.35 ( 2.47 - 43.33 )	10.35 ( 15.84 )	6.84 ( 2.07 )	2.77 ( 1.04 )
Blood Immunoglobulin A Decreased	Investigations	3	10.35 ( 2.47 - 43.33 )	10.35 ( 15.84 )	6.84 ( 2.07 )	2.77 ( 1.04 )
Extramedullary Haemopoiesis	Blood And Lymphatic System Disorders	3	12.94 ( 2.9 - 57.83 )	12.94 ( 18.89 )	7.82 ( 2.24 )	2.97 ( 1.2 )
Latent Tuberculosis	Infections And Infestations	3	12.94 ( 2.9 - 57.83 )	12.94 ( 18.89 )	7.82 ( 2.24 )	2.97 ( 1.2 )
Left Ventricular Dilatation	Cardiac Disorders	3	17.26 ( 3.48 - 85.51 )	17.25 ( 22.97 )	9.13 ( 2.39 )	3.19 ( 1.38 )
Systolic Dysfunction	Cardiac Disorders	3	17.26 ( 3.48 - 85.51 )	17.25 ( 22.97 )	9.13 ( 2.39 )	3.19 ( 1.38 )
Herpes Simplex Viraemia	Infections And Infestations	3	10.35 ( 2.47 - 43.33 )	10.35 ( 15.84 )	6.84 ( 2.07 )	2.77 ( 1.04 )
Cord Colitis Syndrome	Gastrointestinal Disorders	3	51.77 ( 5.38 - 497.75 )	51.76 ( 37.33 )	13.69 ( 2.06 )	3.77 ( 1.84 )
Mucocutaneous Ulceration	Skin And Subcutaneous Tissue Disorders	3	51.77 ( 5.38 - 497.75 )	51.76 ( 37.33 )	13.69 ( 2.06 )	3.77 ( 1.84 )
Jejunal Ulcer	Gastrointestinal Disorders	3	25.88 ( 4.32 - 154.93 )	25.88 ( 28.7 )	10.95 ( 2.45 )	3.45 ( 1.59 )
Respiratory Tract Ulceration	Respiratory, Thoracic And Mediastinal Disorders	3	51.77 ( 5.38 - 497.75 )	51.76 ( 37.33 )	13.69 ( 2.06 )	3.77 ( 1.84 )
Product Used For Unknown Indication	Surgical And Medical Procedures	3	51.77 ( 5.38 - 497.75 )	51.76 ( 37.33 )	13.69 ( 2.06 )	3.77 ( 1.84 )
