# Supplementary material for: Adverse Events Associated with Busulfan in HSCT Pre-Transplant Conditioning: A Retrospective Pharmacovigilance Study of the FAERS Database
Source: Research Square preprint supplement (doi:10.21203/rs.3.rs-6454932/v1), 2025-05-29
Supplement: Supplementary file 3 [file 38c4dc68f6403bef0b83633e.xlsx]

## Sheet: Sheet1
PT	Cases(n)	ROR(95%CI)	PRR(χ2)	EBGM(EBGM05)	IC(IC025)
Product Use In Unapproved Indication	28	16 ( 10.93 - 23.43 )	15.18 ( 372.12 )	15.18 ( 11.03 )	3.92 ( 3.37 )
Venoocclusive Liver Disease	23	593.23 ( 390.03 - 902.29 )	566.42 ( 12912.25 )	563.35 ( 396.63 )	9.14 ( 8.53 )
Febrile Neutropenia	12	22.25 ( 12.55 - 39.46 )	21.75 ( 237.78 )	21.75 ( 13.47 )	4.44 ( 3.63 )
Stomatitis	12	24.2 ( 13.65 - 42.91 )	23.65 ( 260.57 )	23.65 ( 14.65 )	4.56 ( 3.75 )
Diarrhoea	12	2.27 ( 1.28 - 4.02 )	2.24 ( 8.3 )	2.24 ( 1.39 )	1.16 ( 0.35 )
Nausea	10	1.51 ( 0.81 - 2.83 )	1.5 ( 1.7 )	1.5 ( 0.89 )	0.59 ( -0.29 )
Cytopenia	9	103.06 ( 53.29 - 199.31 )	101.26 ( 892.68 )	101.16 ( 58.26 )	6.66 ( 5.74 )
Acute Graft Versus Host Disease	9	237.14 ( 122.58 - 458.79 )	232.96 ( 2074.19 )	232.44 ( 133.81 )	7.86 ( 6.94 )
Malaise	8	2.13 ( 1.06 - 4.28 )	2.11 ( 4.7 )	2.11 ( 1.18 )	1.08 ( 0.11 )
Thrombocytopenia	7	7.53 ( 3.57 - 15.88 )	7.44 ( 39.09 )	7.44 ( 3.99 )	2.9 ( 1.87 )
Thrombotic Microangiopathy	7	91.7 ( 43.48 - 193.41 )	90.45 ( 618.78 )	90.37 ( 48.4 )	6.5 ( 5.47 )
Vomiting	7	1.8 ( 0.85 - 3.78 )	1.78 ( 2.43 )	1.78 ( 0.96 )	0.84 ( -0.19 )
Respiratory Failure	6	9.67 ( 4.32 - 21.63 )	9.57 ( 46.09 )	9.57 ( 4.88 )	3.26 ( 2.16 )
Pulmonary Hypertension	6	33.22 ( 14.85 - 74.31 )	32.84 ( 185.23 )	32.83 ( 16.74 )	5.04 ( 3.94 )
Venoocclusive Disease	6	278.51 ( 124.4 - 623.56 )	275.23 ( 1635.16 )	274.51 ( 139.85 )	8.1 ( 7 )
Bronchopulmonary Aspergillosis	6	96.2 ( 43 - 215.23 )	95.07 ( 558.07 )	94.99 ( 48.42 )	6.57 ( 5.47 )
Sepsis	6	6.36 ( 2.85 - 14.23 )	6.3 ( 26.81 )	6.3 ( 3.21 )	2.66 ( 1.56 )
Graft Versus Host Disease	6	97.76 ( 43.7 - 218.74 )	96.62 ( 567.33 )	96.53 ( 49.21 )	6.59 ( 5.49 )
Autoimmune Haemolytic Anaemia	5	188.92 ( 78.23 - 456.23 )	187.07 ( 923.78 )	186.74 ( 89.3 )	7.54 ( 6.36 )
Anaemia	5	3.06 ( 1.27 - 7.38 )	3.04 ( 6.86 )	3.04 ( 1.45 )	1.6 ( 0.42 )
Acute Respiratory Distress Syndrome	5	33.36 ( 13.82 - 80.5 )	33.04 ( 155.33 )	33.03 ( 15.8 )	5.05 ( 3.86 )
Rash	5	1.4 ( 0.58 - 3.39 )	1.4 ( 0.58 )	1.4 ( 0.67 )	0.49 ( -0.7 )
Off Label Use	4	0.59 ( 0.22 - 1.57 )	0.59 ( 1.14 )	0.59 ( 0.26 )	-0.76 ( -2.05 )
Cytomegalovirus Infection	4	29.19 ( 10.91 - 78.09 )	28.97 ( 108.02 )	28.96 ( 12.71 )	4.86 ( 3.56 )
Hepatic Function Abnormal	4	13.12 ( 4.9 - 35.09 )	13.02 ( 44.42 )	13.02 ( 5.72 )	3.7 ( 2.41 )
Bone Marrow Transplant Rejection	4	2053.42 ( 760.41 - 5545.09 )	2037.26 ( 7984.52 )	1998.1 ( 870.21 )	10.96 ( 9.65 )
Bone Marrow Transplant	4	255.11 ( 95.26 - 683.18 )	253.11 ( 1002.03 )	252.49 ( 110.74 )	7.98 ( 6.68 )
Acute Myeloid Leukaemia	3	23.14 ( 7.44 - 71.99 )	23.01 ( 63.15 )	23 ( 8.9 )	4.52 ( 3.08 )
Neutrophil Count Decreased	3	9.02 ( 2.9 - 28.07 )	8.98 ( 21.27 )	8.98 ( 3.47 )	3.17 ( 1.72 )
White Blood Cell Count Decreased	3	3.26 ( 1.05 - 10.15 )	3.25 ( 4.68 )	3.25 ( 1.26 )	1.7 ( 0.25 )
Neutropenia	3	2.64 ( 0.85 - 8.23 )	2.64 ( 3.05 )	2.64 ( 1.02 )	1.4 ( -0.05 )
Mucosal Inflammation	3	13.77 ( 4.43 - 42.85 )	13.7 ( 35.32 )	13.69 ( 5.3 )	3.78 ( 2.33 )
Interstitial Lung Disease	3	7.53 ( 2.42 - 23.42 )	7.49 ( 16.88 )	7.49 ( 2.9 )	2.9 ( 1.46 )
Myelodysplastic Syndrome	3	24.08 ( 7.74 - 74.93 )	23.95 ( 65.96 )	23.94 ( 9.26 )	4.58 ( 3.13 )
Oropharyngeal Pain	3	3.88 ( 1.25 - 12.07 )	3.86 ( 6.37 )	3.86 ( 1.49 )	1.95 ( 0.5 )
Platelet Count Decreased	3	3.32 ( 1.07 - 10.33 )	3.31 ( 4.83 )	3.31 ( 1.28 )	1.72 ( 0.28 )
Bronchiolitis Obliterans Syndrome	3	2850.47 ( 902.34 - 9004.55 )	2833.64 ( 8269.42 )	2758.44 ( 1053.6 )	11.43 ( 9.96 )
Encephalitis	3	53.1 ( 17.06 - 165.25 )	52.79 ( 152.38 )	52.77 ( 20.41 )	5.72 ( 4.27 )
Mouth Ulceration	3	17.31 ( 5.56 - 53.85 )	17.21 ( 45.81 )	17.21 ( 6.66 )	4.1 ( 2.66 )
Viral Infection	3	11.16 ( 3.59 - 34.73 )	11.1 ( 27.59 )	11.1 ( 4.3 )	3.47 ( 2.02 )
General Physical Health Deterioration	3	3.29 ( 1.06 - 10.23 )	3.27 ( 4.75 )	3.27 ( 1.27 )	1.71 ( 0.26 )
Weight Increased	3	1.62 ( 0.52 - 5.05 )	1.62 ( 0.71 )	1.62 ( 0.63 )	0.69 ( -0.75 )
Staphylococcal Sepsis	3	68.79 ( 22.1 - 214.08 )	68.39 ( 199.09 )	68.34 ( 26.43 )	6.09 ( 4.65 )
Obstructive Airways Disorder	2	21.47 ( 5.35 - 86.08 )	21.39 ( 38.86 )	21.38 ( 6.69 )	4.42 ( 2.75 )
Disease Recurrence	2	4.92 ( 1.23 - 19.73 )	4.91 ( 6.22 )	4.91 ( 1.53 )	2.29 ( 0.62 )
Cystitis Haemorrhagic	2	59.93 ( 14.94 - 240.38 )	59.7 ( 115.37 )	59.66 ( 18.66 )	5.9 ( 4.23 )
Transplant Failure	2	99.15 ( 24.71 - 397.81 )	98.76 ( 193.37 )	98.67 ( 30.86 )	6.62 ( 4.95 )
Acute Lymphocytic Leukaemia	2	80.79 ( 20.14 - 324.12 )	80.48 ( 156.87 )	80.42 ( 25.15 )	6.33 ( 4.66 )
Transplantation Complication	2	610 ( 151.53 - 2455.7 )	607.6 ( 1204.18 )	604.08 ( 188.36 )	9.24 ( 7.56 )
Melaena	2	10.44 ( 2.6 - 41.86 )	10.4 ( 17 )	10.4 ( 3.25 )	3.38 ( 1.71 )
Skin Irritation	2	5.01 ( 1.25 - 20.1 )	5 ( 6.4 )	5 ( 1.56 )	2.32 ( 0.65 )
Staphylococcal Infection	2	6.97 ( 1.74 - 27.94 )	6.94 ( 10.18 )	6.94 ( 2.17 )	2.8 ( 1.12 )
Pulmonary Veno-Occlusive Disease	2	338.67 ( 84.28 - 1360.94 )	337.34 ( 668.52 )	336.25 ( 105.01 )	8.39 ( 6.72 )
Multiple Organ Dysfunction Syndrome	2	9.43 ( 2.35 - 37.82 )	9.4 ( 15.01 )	9.4 ( 2.94 )	3.23 ( 1.56 )
Product Deposit	2	173.56 ( 43.24 - 696.68 )	172.88 ( 341.21 )	172.59 ( 53.95 )	7.43 ( 5.76 )
Cardiac Failure	2	2.92 ( 0.73 - 11.72 )	2.91 ( 2.52 )	2.91 ( 0.91 )	1.54 ( -0.13 )
Pneumonia Viral	2	77.26 ( 19.26 - 309.95 )	76.96 ( 149.85 )	76.91 ( 24.05 )	6.27 ( 4.59 )
Hypoxia	2	6.84 ( 1.71 - 27.42 )	6.82 ( 9.93 )	6.82 ( 2.13 )	2.77 ( 1.1 )
Stenotrophomonas Infection	2	184.62 ( 45.99 - 741.13 )	183.89 ( 363.16 )	183.57 ( 57.38 )	7.52 ( 5.85 )
Drug Effective For Unapproved Indication	2	10.16 ( 2.53 - 40.75 )	10.13 ( 16.46 )	10.13 ( 3.17 )	3.34 ( 1.67 )
Abdominal Pain	2	1.02 ( 0.26 - 4.1 )	1.02 ( 0 )	1.02 ( 0.32 )	0.03 ( -1.64 )
Cholelithiasis	2	7.19 ( 1.79 - 28.85 )	7.17 ( 10.62 )	7.17 ( 2.24 )	2.84 ( 1.17 )
Neutropenic Sepsis	2	31.91 ( 7.96 - 127.95 )	31.78 ( 59.62 )	31.77 ( 9.94 )	4.99 ( 3.32 )
Altered State Of Consciousness	2	11.37 ( 2.84 - 45.61 )	11.33 ( 18.85 )	11.33 ( 3.55 )	3.5 ( 1.83 )
Decreased Appetite	2	1.04 ( 0.26 - 4.17 )	1.04 ( 0 )	1.04 ( 0.33 )	0.06 ( -1.61 )
Scedosporium Infection	2	384.91 ( 95.75 - 1547.22 )	383.4 ( 760 )	381.99 ( 119.26 )	8.58 ( 6.9 )
Right Ventricular Failure	2	31.58 ( 7.87 - 126.63 )	31.46 ( 58.97 )	31.45 ( 9.84 )	4.97 ( 3.3 )
Pulmonary Alveolar Haemorrhage	2	44.48 ( 11.09 - 178.39 )	44.31 ( 84.63 )	44.29 ( 13.85 )	5.47 ( 3.8 )
Cytomegalovirus Infection Reactivation	2	74.96 ( 18.69 - 300.7 )	74.67 ( 145.27 )	74.61 ( 23.34 )	6.22 ( 4.55 )
Stupor	2	69.93 ( 17.43 - 280.53 )	69.66 ( 135.27 )	69.62 ( 21.77 )	6.12 ( 4.45 )
Gastric Haemorrhage	2	19.46 ( 4.85 - 78.04 )	19.39 ( 34.88 )	19.38 ( 6.06 )	4.28 ( 2.61 )
Granuloma	2	68.26 ( 17.02 - 273.82 )	68 ( 131.95 )	67.95 ( 21.25 )	6.09 ( 4.41 )
Hepatitis	2	9.32 ( 2.32 - 37.35 )	9.28 ( 14.79 )	9.28 ( 2.9 )	3.21 ( 1.54 )
Gastrointestinal Haemorrhage	2	2.68 ( 0.67 - 10.74 )	2.67 ( 2.1 )	2.67 ( 0.84 )	1.42 ( -0.25 )
Peritonitis	2	11.15 ( 2.78 - 44.7 )	11.11 ( 18.4 )	11.11 ( 3.48 )	3.47 ( 1.8 )
Haemodialysis	2	25.24 ( 6.29 - 101.23 )	25.15 ( 46.37 )	25.14 ( 7.87 )	4.65 ( 2.98 )
Renal Failure	2	1.68 ( 0.42 - 6.75 )	1.68 ( 0.55 )	1.68 ( 0.53 )	0.75 ( -0.92 )
Liver Disorder	2	5.42 ( 1.35 - 21.72 )	5.4 ( 7.17 )	5.4 ( 1.69 )	2.43 ( 0.76 )
Continuous Haemodiafiltration	2	224.08 ( 55.8 - 899.78 )	223.2 ( 441.47 )	222.73 ( 69.6 )	7.8 ( 6.13 )
Pneumonia Fungal	2	66.67 ( 16.62 - 267.43 )	66.41 ( 128.78 )	66.37 ( 20.76 )	6.05 ( 4.38 )
Central Venous Catheterisation	1	39.06 ( 5.49 - 277.95 )	38.99 ( 37 )	38.97 ( 7.55 )	5.28 ( 3.24 )
Respiratory Distress	1	4.24 ( 0.6 - 30.13 )	4.23 ( 2.47 )	4.23 ( 0.82 )	2.08 ( 0.04 )
Upper Respiratory Tract Infection	1	2.6 ( 0.37 - 18.53 )	2.6 ( 0.99 )	2.6 ( 0.5 )	1.38 ( -0.67 )
Bacterial Infection	1	6.56 ( 0.92 - 46.66 )	6.55 ( 4.7 )	6.55 ( 1.27 )	2.71 ( 0.67 )
Skin Infection	1	10.96 ( 1.54 - 77.94 )	10.94 ( 9.03 )	10.94 ( 2.12 )	3.45 ( 1.41 )
Vasculitis	1	10.16 ( 1.43 - 72.27 )	10.14 ( 8.24 )	10.14 ( 1.96 )	3.34 ( 1.3 )
Haemorrhagic Disorder	1	104.94 ( 14.74 - 747.2 )	104.74 ( 102.65 )	104.63 ( 20.25 )	6.71 ( 4.66 )
Acute Lymphocytic Leukaemia Recurrent	1	48.8 ( 6.86 - 347.31 )	48.71 ( 46.71 )	48.69 ( 9.43 )	5.61 ( 3.56 )
Tooth Development Disorder	1	788.67 ( 110.06 - 5651.57 )	787.12 ( 779.22 )	781.21 ( 150.36 )	9.61 ( 7.55 )
Acute Graft Versus Host Disease In Intestine	1	89.67 ( 12.6 - 638.34 )	89.49 ( 87.43 )	89.42 ( 17.3 )	6.48 ( 4.44 )
Drug Ineffective	1	0.09 ( 0.01 - 0.62 )	0.09 ( 9.48 )	0.09 ( 0.02 )	-3.48 ( -5.53 )
Electrocardiogram Abnormal	1	14.37 ( 2.02 - 102.24 )	14.34 ( 12.41 )	14.34 ( 2.78 )	3.84 ( 1.8 )
Hypokalaemia	1	2.59 ( 0.36 - 18.41 )	2.58 ( 0.97 )	2.58 ( 0.5 )	1.37 ( -0.67 )
Hypokalaemic Syndrome	1	1466.27 ( 203.32 - 10573.96 )	1463.38 ( 1441.09 )	1443.07 ( 276.28 )	10.49 ( 8.42 )
Muscular Weakness	1	1.03 ( 0.15 - 7.35 )	1.03 ( 0 )	1.03 ( 0.2 )	0.05 ( -2 )
Paralysis	1	8.08 ( 1.14 - 57.49 )	8.07 ( 6.19 )	8.07 ( 1.56 )	3.01 ( 0.97 )
Extravasation	1	28.1 ( 3.95 - 199.91 )	28.04 ( 26.07 )	28.04 ( 5.43 )	4.81 ( 2.76 )
Seizure	1	1.08 ( 0.15 - 7.66 )	1.08 ( 0.01 )	1.08 ( 0.21 )	0.11 ( -1.94 )
Hypogonadism	1	111.82 ( 15.7 - 796.21 )	111.6 ( 109.49 )	111.48 ( 21.57 )	6.8 ( 4.75 )
Alanine Aminotransferase Increased	1	1.88 ( 0.26 - 13.37 )	1.88 ( 0.41 )	1.88 ( 0.36 )	0.91 ( -1.14 )
Aspartate Aminotransferase Increased	1	2.17 ( 0.31 - 15.43 )	2.17 ( 0.63 )	2.17 ( 0.42 )	1.12 ( -0.93 )
Gamma-Glutamyltransferase Increased	1	5.08 ( 0.71 - 36.13 )	5.07 ( 3.27 )	5.07 ( 0.98 )	2.34 ( 0.3 )
Pain In Extremity	1	0.39 ( 0.05 - 2.77 )	0.39 ( 0.96 )	0.39 ( 0.08 )	-1.36 ( -3.4 )
Auditory Disorder	1	89.21 ( 12.53 - 635.06 )	89.03 ( 86.97 )	88.96 ( 17.22 )	6.48 ( 4.43 )
Electroencephalogram Abnormal	1	35.81 ( 5.03 - 254.8 )	35.74 ( 33.76 )	35.73 ( 6.92 )	5.16 ( 3.11 )
Hallucination, Auditory	1	7.39 ( 1.04 - 52.55 )	7.37 ( 5.51 )	7.37 ( 1.43 )	2.88 ( 0.84 )
Hallucination, Visual	1	5.81 ( 0.82 - 41.34 )	5.8 ( 3.98 )	5.8 ( 1.12 )	2.54 ( 0.49 )
Pulmonary Vein Occlusion	1	1508.77 ( 209.13 - 10884.77 )	1505.8 ( 1482.32 )	1484.3 ( 284.08 )	10.54 ( 8.46 )
Pneumonia	1	0.37 ( 0.05 - 2.64 )	0.37 ( 1.06 )	0.37 ( 0.07 )	-1.42 ( -3.47 )
Septic Shock	1	2.8 ( 0.39 - 19.93 )	2.8 ( 1.16 )	2.8 ( 0.54 )	1.48 ( -0.56 )
Skin Lesion	1	4.4 ( 0.62 - 31.31 )	4.4 ( 2.62 )	4.4 ( 0.85 )	2.14 ( 0.09 )
Hepatic Enzyme Increased	1	1.8 ( 0.25 - 12.81 )	1.8 ( 0.36 )	1.8 ( 0.35 )	0.85 ( -1.2 )
Escherichia Urinary Tract Infection	1	27.14 ( 3.81 - 193.08 )	27.09 ( 25.12 )	27.08 ( 5.24 )	4.76 ( 2.71 )
Transaminases Increased	1	5.26 ( 0.74 - 37.45 )	5.26 ( 3.45 )	5.26 ( 1.02 )	2.39 ( 0.35 )
Diarrhoea Infectious	1	157.97 ( 22.18 - 1125.34 )	157.66 ( 155.44 )	157.43 ( 30.45 )	7.3 ( 5.25 )
Papilloma Viral Infection	1	74.47 ( 10.46 - 530.05 )	74.32 ( 72.28 )	74.27 ( 14.37 )	6.21 ( 4.17 )
Pharyngitis	1	9.32 ( 1.31 - 66.33 )	9.31 ( 7.42 )	9.31 ( 1.8 )	3.22 ( 1.17 )
Underdose	1	1.64 ( 0.23 - 11.64 )	1.63 ( 0.25 )	1.63 ( 0.32 )	0.71 ( -1.34 )
Arterial Injury	1	156.55 ( 21.98 - 1115.17 )	156.24 ( 154.02 )	156.01 ( 30.18 )	7.29 ( 5.24 )
Systemic Candida	1	52.5 ( 7.38 - 373.6 )	52.4 ( 50.39 )	52.37 ( 10.14 )	5.71 ( 3.67 )
Bronchiectasis	1	19.09 ( 2.68 - 135.78 )	19.05 ( 17.1 )	19.05 ( 3.69 )	4.25 ( 2.21 )
Deafness	1	4.59 ( 0.65 - 32.64 )	4.58 ( 2.8 )	4.58 ( 0.89 )	2.2 ( 0.15 )
Hypothyroidism	1	3.81 ( 0.54 - 27.09 )	3.8 ( 2.07 )	3.8 ( 0.74 )	1.93 ( -0.12 )
Death	1	0.14 ( 0.02 - 0.97 )	0.14 ( 5.45 )	0.14 ( 0.03 )	-2.86 ( -4.9 )
Hepatic Necrosis	1	29.68 ( 4.17 - 211.2 )	29.63 ( 27.65 )	29.62 ( 5.73 )	4.89 ( 2.84 )
Haemorrhage Intracranial	1	7.47 ( 1.05 - 53.15 )	7.46 ( 5.59 )	7.46 ( 1.44 )	2.9 ( 0.85 )
Cardiac Failure Congestive	1	1.35 ( 0.19 - 9.62 )	1.35 ( 0.09 )	1.35 ( 0.26 )	0.44 ( -1.61 )
Thrombosis	1	1.44 ( 0.2 - 10.25 )	1.44 ( 0.13 )	1.44 ( 0.28 )	0.53 ( -1.52 )
Myocardial Infarction	1	0.63 ( 0.09 - 4.48 )	0.63 ( 0.22 )	0.63 ( 0.12 )	-0.66 ( -2.71 )
Gastroenteritis	1	8.17 ( 1.15 - 58.14 )	8.16 ( 6.28 )	8.16 ( 1.58 )	3.03 ( 0.98 )
Pulmonary Fibrosis	1	6.5 ( 0.91 - 46.2 )	6.48 ( 4.64 )	6.48 ( 1.26 )	2.7 ( 0.65 )
Influenza	1	1.13 ( 0.16 - 8.04 )	1.13 ( 0.01 )	1.13 ( 0.22 )	0.18 ( -1.87 )
Iron Overload	1	109.01 ( 15.31 - 776.18 )	108.8 ( 106.7 )	108.68 ( 21.03 )	6.76 ( 4.72 )
Ewing-Like Sarcoma	1	34701.74 ( 3603.49 - 334178.78 )	34633.43 ( 25973.57 )	25975.32 ( 3904.14 )	14.66 ( 12.25 )
Metastases To Lung	1	10.61 ( 1.49 - 75.46 )	10.59 ( 8.68 )	10.59 ( 2.05 )	3.4 ( 1.36 )
Hyponatraemia	1	2.07 ( 0.29 - 14.72 )	2.07 ( 0.55 )	2.07 ( 0.4 )	1.05 ( -1 )
Dry Skin	1	0.95 ( 0.13 - 6.74 )	0.95 ( 0 )	0.95 ( 0.18 )	-0.08 ( -2.12 )
Hypersensitivity	1	0.64 ( 0.09 - 4.53 )	0.64 ( 0.21 )	0.64 ( 0.12 )	-0.65 ( -2.69 )
Hypomagnesaemia	1	8.76 ( 1.23 - 62.35 )	8.75 ( 6.86 )	8.75 ( 1.69 )	3.13 ( 1.08 )
Insomnia	1	0.43 ( 0.06 - 3.09 )	0.44 ( 0.74 )	0.44 ( 0.08 )	-1.2 ( -3.24 )
Pyrexia	1	0.34 ( 0.05 - 2.4 )	0.34 ( 1.3 )	0.34 ( 0.07 )	-1.56 ( -3.61 )
Salivary Gland Cancer	1	224.85 ( 31.54 - 1602.74 )	224.41 ( 221.93 )	223.93 ( 43.29 )	7.81 ( 5.76 )
Constipation	1	0.57 ( 0.08 - 4.03 )	0.57 ( 0.33 )	0.57 ( 0.11 )	-0.82 ( -2.86 )
Dysgeusia	1	1.51 ( 0.21 - 10.75 )	1.51 ( 0.17 )	1.51 ( 0.29 )	0.59 ( -1.45 )
Proctalgia	1	18.47 ( 2.6 - 131.42 )	18.44 ( 16.49 )	18.44 ( 3.57 )	4.2 ( 2.16 )
Rash Maculo-Papular	1	5.43 ( 0.76 - 38.62 )	5.42 ( 3.61 )	5.42 ( 1.05 )	2.44 ( 0.39 )
Injection Site Reaction	1	1.74 ( 0.24 - 12.37 )	1.74 ( 0.31 )	1.74 ( 0.34 )	0.8 ( -1.25 )
Epidermal Necrosis	1	126.8 ( 17.81 - 903.02 )	126.55 ( 124.41 )	126.4 ( 24.46 )	6.98 ( 4.94 )
Rash Erythematous	1	2.77 ( 0.39 - 19.7 )	2.77 ( 1.13 )	2.77 ( 0.54 )	1.47 ( -0.58 )
Pneumonitis	1	4.57 ( 0.64 - 32.54 )	4.57 ( 2.79 )	4.57 ( 0.88 )	2.19 ( 0.15 )
Cytomegalovirus Colitis	1	58.55 ( 8.23 - 416.7 )	58.44 ( 56.42 )	58.4 ( 11.31 )	5.87 ( 3.82 )
Mycobacterial Infection	1	69.68 ( 9.79 - 495.96 )	69.55 ( 67.52 )	69.5 ( 13.45 )	6.12 ( 4.07 )
Immune Thrombocytopenia	1	32.62 ( 4.58 - 232.12 )	32.56 ( 30.58 )	32.55 ( 6.3 )	5.02 ( 2.98 )
Epistaxis	1	1.56 ( 0.22 - 11.1 )	1.56 ( 0.2 )	1.56 ( 0.3 )	0.64 ( -1.4 )
Device Related Thrombosis	1	133.64 ( 18.76 - 951.77 )	133.38 ( 131.22 )	133.21 ( 25.77 )	7.06 ( 5.01 )
Cardiac Arrest	1	1.39 ( 0.2 - 9.92 )	1.39 ( 0.11 )	1.39 ( 0.27 )	0.48 ( -1.57 )
Autism Spectrum Disorder	1	28.94 ( 4.07 - 205.91 )	28.89 ( 26.91 )	28.88 ( 5.59 )	4.85 ( 2.81 )
Encephalitis Cytomegalovirus	1	308 ( 43.18 - 2197.18 )	307.4 ( 304.5 )	306.49 ( 59.21 )	8.26 ( 6.21 )
Gastroenteritis Rotavirus	1	379.94 ( 53.22 - 2712.23 )	379.2 ( 375.83 )	377.82 ( 72.95 )	8.56 ( 6.51 )
Cholangitis	1	20.74 ( 2.92 - 147.58 )	20.71 ( 18.75 )	20.7 ( 4.01 )	4.37 ( 2.33 )
Gastroenteritis Norovirus	1	85.82 ( 12.06 - 610.95 )	85.66 ( 83.6 )	85.59 ( 16.56 )	6.42 ( 4.37 )
Gastroenteritis Clostridial	1	328.41 ( 46.03 - 2343.19 )	327.76 ( 324.74 )	326.73 ( 63.11 )	8.35 ( 6.3 )
Device Related Bacteraemia	1	536.62 ( 75.06 - 3836.32 )	535.57 ( 530.84 )	532.83 ( 102.76 )	9.06 ( 7 )
Varicella Virus Test Positive	1	708.2 ( 98.9 - 5071.05 )	706.8 ( 700.05 )	702.04 ( 135.21 )	9.46 ( 7.4 )
Meningitis	1	17.93 ( 2.52 - 127.59 )	17.9 ( 15.96 )	17.9 ( 3.47 )	4.16 ( 2.12 )
Drug Level Below Therapeutic	1	22.27 ( 3.13 - 158.42 )	22.22 ( 20.27 )	22.22 ( 4.3 )	4.47 ( 2.43 )
Coma	1	2.44 ( 0.34 - 17.37 )	2.44 ( 0.85 )	2.44 ( 0.47 )	1.29 ( -0.76 )
Encephalopathy	1	4.84 ( 0.68 - 34.45 )	4.84 ( 3.04 )	4.84 ( 0.94 )	2.27 ( 0.23 )
Expired Product Administered	1	3.54 ( 0.5 - 25.17 )	3.53 ( 1.82 )	3.53 ( 0.68 )	1.82 ( -0.22 )
Product Dispensing Error	1	6.04 ( 0.85 - 42.94 )	6.03 ( 4.19 )	6.03 ( 1.17 )	2.59 ( 0.55 )
Urticaria	1	0.73 ( 0.1 - 5.21 )	0.73 ( 0.1 )	0.73 ( 0.14 )	-0.45 ( -2.49 )
Chills	1	0.99 ( 0.14 - 7.07 )	0.99 ( 0 )	0.99 ( 0.19 )	-0.01 ( -2.05 )
Type I Hypersensitivity	1	37.11 ( 5.22 - 264.07 )	37.04 ( 35.06 )	37.03 ( 7.17 )	5.21 ( 3.17 )
Growth Retardation	1	39.25 ( 5.52 - 279.31 )	39.18 ( 37.19 )	39.16 ( 7.58 )	5.29 ( 3.25 )
Weight Gain Poor	1	53.55 ( 7.52 - 381.1 )	53.45 ( 51.44 )	53.42 ( 10.34 )	5.74 ( 3.69 )
Failure To Thrive	1	21.67 ( 3.05 - 154.19 )	21.63 ( 19.68 )	21.63 ( 4.19 )	4.43 ( 2.39 )
Abdominal Distension	1	1.16 ( 0.16 - 8.23 )	1.16 ( 0.02 )	1.16 ( 0.22 )	0.21 ( -1.83 )
Idiopathic Pneumonia Syndrome	1	464.75 ( 65.05 - 3320.28 )	463.84 ( 459.79 )	461.78 ( 89.11 )	8.85 ( 6.8 )
Headache	1	0.19 ( 0.03 - 1.32 )	0.19 ( 3.56 )	0.19 ( 0.04 )	-2.41 ( -4.46 )
Haemophagocytic Lymphohistiocytosis	1	20.6 ( 2.9 - 146.59 )	20.57 ( 18.61 )	20.56 ( 3.98 )	4.36 ( 2.32 )
Delayed Engraftment	1	905.26 ( 126.19 - 6494.1 )	903.48 ( 893.71 )	895.7 ( 172.24 )	9.81 ( 7.75 )
Neoplasm	1	10.44 ( 1.47 - 74.28 )	10.42 ( 8.52 )	10.42 ( 2.02 )	3.38 ( 1.34 )
Traumatic Lung Injury	1	61.38 ( 8.62 - 436.86 )	61.26 ( 59.25 )	61.23 ( 11.85 )	5.94 ( 3.89 )
Pulmonary Toxicity	1	18.2 ( 2.56 - 129.49 )	18.17 ( 16.22 )	18.16 ( 3.52 )	4.18 ( 2.14 )
Gastrointestinal Candidiasis	1	299.15 ( 41.94 - 2133.87 )	298.56 ( 295.72 )	297.71 ( 57.52 )	8.22 ( 6.17 )
Clostridium Colitis	1	90.29 ( 12.68 - 642.77 )	90.11 ( 88.05 )	90.04 ( 17.42 )	6.49 ( 4.45 )
Skin Disorder	1	3.61 ( 0.51 - 25.69 )	3.61 ( 1.88 )	3.61 ( 0.7 )	1.85 ( -0.19 )
Pneumothorax	1	7.5 ( 1.05 - 53.36 )	7.49 ( 5.62 )	7.49 ( 1.45 )	2.9 ( 0.86 )
Liver Function Test Abnormal	1	3.82 ( 0.54 - 27.16 )	3.81 ( 2.08 )	3.81 ( 0.74 )	1.93 ( -0.11 )
Injection Site Extravasation	1	8.76 ( 1.23 - 62.31 )	8.74 ( 6.86 )	8.74 ( 1.69 )	3.13 ( 1.08 )
Dermatitis Diaper	1	169 ( 23.72 - 1204.02 )	168.67 ( 166.41 )	168.4 ( 32.57 )	7.4 ( 5.35 )
Coagulation Factor Xiii Level Decreased	1	2215 ( 305.01 - 16085.31 )	2210.64 ( 2162.63 )	2164.61 ( 412.01 )	11.08 ( 8.99 )
Disease Progression	1	1.01 ( 0.14 - 7.19 )	1.01 ( 0 )	1.01 ( 0.2 )	0.02 ( -2.03 )
Human T-Cell Lymphotropic Virus Type I Infection	1	1927.87 ( 266.19 - 13962.79 )	1924.08 ( 1887.13 )	1889.11 ( 360.38 )	10.88 ( 8.8 )
Mallory-Weiss Syndrome	1	89.28 ( 12.54 - 635.6 )	89.11 ( 87.05 )	89.03 ( 17.23 )	6.48 ( 4.43 )
Stem Cell Transplant	1	49.08 ( 6.9 - 349.28 )	48.99 ( 46.99 )	48.96 ( 9.48 )	5.61 ( 3.57 )
Tumour Lysis Syndrome	1	14.11 ( 1.98 - 100.37 )	14.08 ( 12.15 )	14.08 ( 2.73 )	3.82 ( 1.77 )
Blood Stem Cell Transplant Failure	1	559.7 ( 78.27 - 4002.18 )	558.6 ( 553.63 )	555.62 ( 107.13 )	9.12 ( 7.06 )
Performance Status Decreased	1	24.61 ( 3.46 - 175.09 )	24.56 ( 22.6 )	24.56 ( 4.75 )	4.62 ( 2.57 )
Cholecystitis	1	10.18 ( 1.43 - 72.41 )	10.16 ( 8.26 )	10.16 ( 1.97 )	3.34 ( 1.3 )
Hypoalbuminaemia	1	15.69 ( 2.21 - 111.63 )	15.66 ( 13.73 )	15.66 ( 3.03 )	3.97 ( 1.92 )
Blood Lactate Dehydrogenase Increased	1	6.97 ( 0.98 - 49.61 )	6.96 ( 5.11 )	6.96 ( 1.35 )	2.8 ( 0.76 )
Haemorrhagic Cerebral Infarction	1	157.73 ( 22.14 - 1123.63 )	157.42 ( 155.2 )	157.19 ( 30.4 )	7.3 ( 5.25 )
Red Blood Cell Abnormality	1	119.11 ( 16.73 - 848.2 )	118.88 ( 116.76 )	118.74 ( 22.98 )	6.89 ( 4.85 )
Thrombocytopenic Purpura	1	83.15 ( 11.68 - 591.91 )	82.99 ( 80.94 )	82.92 ( 16.05 )	6.37 ( 4.33 )
Ascites	1	3.98 ( 0.56 - 28.32 )	3.97 ( 2.23 )	3.97 ( 0.77 )	1.99 ( -0.05 )
Dyspnoea	1	0.21 ( 0.03 - 1.47 )	0.21 ( 3.04 )	0.21 ( 0.04 )	-2.26 ( -4.31 )
Gallbladder Enlargement	1	116.71 ( 16.39 - 831.06 )	116.48 ( 114.36 )	116.35 ( 22.51 )	6.86 ( 4.82 )
Haematemesis	1	4.54 ( 0.64 - 32.31 )	4.54 ( 2.76 )	4.54 ( 0.88 )	2.18 ( 0.14 )
Hepatic Failure	1	3.84 ( 0.54 - 27.32 )	3.83 ( 2.1 )	3.83 ( 0.74 )	1.94 ( -0.11 )
Hepatomegaly	1	11.43 ( 1.61 - 81.34 )	11.41 ( 9.5 )	11.41 ( 2.21 )	3.51 ( 1.47 )
Hypopnoea	1	35.54 ( 4.99 - 252.89 )	35.47 ( 33.49 )	35.46 ( 6.87 )	5.15 ( 3.1 )
Oxygen Saturation Decreased	1	2.21 ( 0.31 - 15.71 )	2.21 ( 0.66 )	2.21 ( 0.43 )	1.14 ( -0.9 )
Bone Marrow Failure	1	5.42 ( 0.76 - 38.58 )	5.42 ( 3.6 )	5.42 ( 1.05 )	2.44 ( 0.39 )
Pharyngitis Bacterial	1	462.69 ( 64.77 - 3305.46 )	461.78 ( 457.75 )	459.74 ( 88.71 )	8.84 ( 6.79 )
Pseudomonas Infection	1	14.66 ( 2.06 - 104.31 )	14.64 ( 12.7 )	14.63 ( 2.83 )	3.87 ( 1.83 )
Enteritis	1	19.52 ( 2.74 - 138.89 )	19.49 ( 17.54 )	19.48 ( 3.77 )	4.28 ( 2.24 )
Generalised Oedema	1	9.74 ( 1.37 - 69.3 )	9.72 ( 7.83 )	9.72 ( 1.88 )	3.28 ( 1.24 )
Pseudomembranous Colitis	1	50.71 ( 7.13 - 360.85 )	50.61 ( 48.61 )	50.58 ( 9.79 )	5.66 ( 3.62 )
Infection	1	0.85 ( 0.12 - 6.02 )	0.85 ( 0.03 )	0.85 ( 0.16 )	-0.24 ( -2.28 )
Pancytopenia	1	2.14 ( 0.3 - 15.24 )	2.14 ( 0.61 )	2.14 ( 0.41 )	1.1 ( -0.95 )
Blister	1	2.16 ( 0.3 - 15.39 )	2.16 ( 0.62 )	2.16 ( 0.42 )	1.11 ( -0.93 )
Diabetes Mellitus	1	1.51 ( 0.21 - 10.71 )	1.5 ( 0.17 )	1.5 ( 0.29 )	0.59 ( -1.46 )
Haematochezia	1	2.22 ( 0.31 - 15.8 )	2.22 ( 0.67 )	2.22 ( 0.43 )	1.15 ( -0.89 )
Pruritus	1	0.34 ( 0.05 - 2.39 )	0.34 ( 1.31 )	0.34 ( 0.07 )	-1.57 ( -3.61 )
Disseminated Intravascular Coagulation	1	8.07 ( 1.13 - 57.42 )	8.06 ( 6.18 )	8.06 ( 1.56 )	3.01 ( 0.97 )
Pancreatitis Acute	1	5.4 ( 0.76 - 38.39 )	5.39 ( 3.58 )	5.39 ( 1.04 )	2.43 ( 0.39 )
Pleural Effusion	1	1.9 ( 0.27 - 13.53 )	1.9 ( 0.43 )	1.9 ( 0.37 )	0.93 ( -1.12 )
Pneumonia Bacterial	1	13.91 ( 1.96 - 98.94 )	13.88 ( 11.96 )	13.88 ( 2.69 )	3.8 ( 1.75 )
Pneumonia Cytomegaloviral	1	64.38 ( 9.05 - 458.21 )	64.25 ( 62.23 )	64.22 ( 12.43 )	6 ( 3.96 )
Urine Output Decreased	1	13.09 ( 1.84 - 93.15 )	13.07 ( 11.15 )	13.07 ( 2.53 )	3.71 ( 1.66 )
Coagulopathy	1	6.92 ( 0.97 - 49.25 )	6.91 ( 5.06 )	6.91 ( 1.34 )	2.79 ( 0.74 )
Gastritis	1	4.44 ( 0.62 - 31.58 )	4.43 ( 2.66 )	4.43 ( 0.86 )	2.15 ( 0.1 )
Haemosiderosis	1	423.19 ( 59.26 - 3022.17 )	422.36 ( 418.66 )	420.65 ( 81.2 )	8.72 ( 6.66 )
Hyperbilirubinaemia	1	11.64 ( 1.64 - 82.82 )	11.62 ( 9.71 )	11.62 ( 2.25 )	3.54 ( 1.49 )
Hypoproteinaemia	1	65.43 ( 9.19 - 465.71 )	65.31 ( 63.28 )	65.26 ( 12.63 )	6.03 ( 3.98 )
Renal Impairment	1	1.43 ( 0.2 - 10.21 )	1.43 ( 0.13 )	1.43 ( 0.28 )	0.52 ( -1.52 )
Shock	1	5.28 ( 0.74 - 37.58 )	5.28 ( 3.47 )	5.27 ( 1.02 )	2.4 ( 0.35 )
Cytomegalovirus Viraemia	1	29.93 ( 4.21 - 212.96 )	29.87 ( 27.9 )	29.87 ( 5.78 )	4.9 ( 2.86 )
Lymphocyte Count Decreased	1	6.57 ( 0.92 - 46.74 )	6.56 ( 4.71 )	6.56 ( 1.27 )	2.71 ( 0.67 )
Pneumonia Staphylococcal	1	59.32 ( 8.33 - 422.16 )	59.2 ( 57.19 )	59.17 ( 11.45 )	5.89 ( 3.84 )
Viraemia	1	90.05 ( 12.65 - 641.1 )	89.88 ( 87.82 )	89.8 ( 17.38 )	6.49 ( 4.44 )
Acute Myeloid Leukaemia Recurrent	1	63.02 ( 8.85 - 448.5 )	62.89 ( 60.87 )	62.86 ( 12.17 )	5.97 ( 3.93 )
Cryptosporidiosis Infection	1	239.87 ( 33.65 - 1710.07 )	239.4 ( 236.86 )	238.85 ( 46.17 )	7.9 ( 5.85 )
Pancreatitis	1	2.22 ( 0.31 - 15.79 )	2.22 ( 0.67 )	2.22 ( 0.43 )	1.15 ( -0.9 )
Adenovirus Infection	1	43.91 ( 6.17 - 312.43 )	43.82 ( 41.83 )	43.8 ( 8.48 )	5.45 ( 3.41 )
