# Supplementary material for: Adverse Events Associated with Busulfan in HSCT Pre-Transplant Conditioning: A Retrospective Pharmacovigilance Study of the FAERS Database
Source: Research Square preprint supplement (doi:10.21203/rs.3.rs-6454932/v1), 2025-05-29
Supplement: Supplementary file 4 [file 3aeb48c7ef79ba4fe258fa3d.xlsx]

## Sheet: Sheet1
PT	Cases(n)	ROR(95%CI)	PRR(χ2)	EBGM(EBGM05)	IC(IC025)
Product Use In Unapproved Indication	696	4.87 ( 4.47 - 5.31 )	4.59 ( 1569.82 )	3.83 ( 3.56 )	1.94 ( 1.81 )
Off Label Use	244	0.91 ( 0.8 - 1.04 )	0.91 ( 2.08 )	0.92 ( 0.82 )	-0.13 ( -0.32 )
Venoocclusive Liver Disease	223	5 ( 4.3 - 5.81 )	4.9 ( 541.14 )	4.03 ( 3.55 )	2.01 ( 1.8 )
Mucosal Inflammation	180	2.85 ( 2.43 - 3.35 )	2.82 ( 182.52 )	2.56 ( 2.24 )	1.36 ( 1.13 )
Cytomegalovirus Infection	167	1.22 ( 1.04 - 1.43 )	1.22 ( 6.11 )	1.2 ( 1.05 )	0.27 ( 0.03 )
Cytomegalovirus Infection Reactivation	148	4.12 ( 3.44 - 4.93 )	4.07 ( 277.76 )	3.48 ( 2.99 )	1.8 ( 1.54 )
Cystitis Haemorrhagic	122	2.86 ( 2.36 - 3.47 )	2.84 ( 124.98 )	2.57 ( 2.19 )	1.36 ( 1.08 )
Febrile Neutropenia	118	1.42 ( 1.18 - 1.72 )	1.42 ( 13.61 )	1.39 ( 1.18 )	0.47 ( 0.2 )
Respiratory Failure	108	1.81 ( 1.48 - 2.21 )	1.8 ( 34.98 )	1.72 ( 1.46 )	0.79 ( 0.49 )
Thrombotic Microangiopathy	108	1.66 ( 1.36 - 2.03 )	1.65 ( 25.58 )	1.6 ( 1.35 )	0.67 ( 0.38 )
Sepsis	103	1.2 ( 0.98 - 1.47 )	1.2 ( 3.26 )	1.19 ( 1 )	0.25 ( -0.05 )
Venoocclusive Disease	103	4.86 ( 3.9 - 6.05 )	4.82 ( 243.41 )	3.97 ( 3.31 )	1.99 ( 1.68 )
Bk Virus Infection	97	2.47 ( 2 - 3.06 )	2.46 ( 73.55 )	2.27 ( 1.9 )	1.18 ( 0.87 )
Graft Versus Host Disease	95	1.06 ( 0.86 - 1.3 )	1.06 ( 0.28 )	1.05 ( 0.88 )	0.08 ( -0.23 )
Pneumonia	86	0.99 ( 0.79 - 1.23 )	0.99 ( 0.02 )	0.99 ( 0.82 )	-0.02 ( -0.34 )
Multiple Organ Dysfunction Syndrome	84	2.05 ( 1.64 - 2.58 )	2.05 ( 40.24 )	1.93 ( 1.6 )	0.95 ( 0.62 )
Pyrexia	82	0.59 ( 0.47 - 0.74 )	0.59 ( 22.17 )	0.61 ( 0.51 )	-0.72 ( -1.04 )
Thrombocytopenia	75	1.25 ( 0.99 - 1.58 )	1.25 ( 3.4 )	1.23 ( 1.01 )	0.3 ( -0.05 )
Cytomegalovirus Viraemia	72	1.75 ( 1.37 - 2.23 )	1.75 ( 20.89 )	1.68 ( 1.37 )	0.75 ( 0.39 )
Post Transplant Lymphoproliferative Disorder	71	1.61 ( 1.26 - 2.05 )	1.6 ( 14.69 )	1.55 ( 1.26 )	0.63 ( 0.28 )
Acute Kidney Injury	70	0.86 ( 0.67 - 1.09 )	0.86 ( 1.59 )	0.86 ( 0.71 )	-0.21 ( -0.56 )
Diarrhoea	68	0.7 ( 0.55 - 0.89 )	0.7 ( 8.3 )	0.71 ( 0.58 )	-0.49 ( -0.84 )
Acute Graft Versus Host Disease	66	0.68 ( 0.53 - 0.86 )	0.68 ( 9.84 )	0.69 ( 0.56 )	-0.54 ( -0.9 )
Infection	66	0.99 ( 0.77 - 1.27 )	0.99 ( 0.01 )	0.99 ( 0.8 )	-0.01 ( -0.38 )
Stomatitis	63	2.67 ( 2.04 - 3.48 )	2.65 ( 56.34 )	2.43 ( 1.95 )	1.28 ( 0.9 )
Drug Ineffective	58	0.43 ( 0.33 - 0.56 )	0.43 ( 43.11 )	0.44 ( 0.36 )	-1.17 ( -1.55 )
Transplant Failure	57	2.69 ( 2.03 - 3.56 )	2.68 ( 51.99 )	2.45 ( 1.94 )	1.29 ( 0.89 )
Septic Shock	57	1.33 ( 1.01 - 1.74 )	1.32 ( 4.2 )	1.3 ( 1.04 )	0.38 ( -0.01 )
Haemophagocytic Lymphohistiocytosis	57	4.27 ( 3.2 - 5.72 )	4.25 ( 113.73 )	3.6 ( 2.83 )	1.85 ( 1.43 )
Pancytopenia	55	1.15 ( 0.87 - 1.51 )	1.15 ( 0.96 )	1.14 ( 0.9 )	0.18 ( -0.21 )
Neutropenia	54	0.82 ( 0.62 - 1.08 )	0.82 ( 1.98 )	0.83 ( 0.66 )	-0.27 ( -0.67 )
Adenovirus Infection	53	1.37 ( 1.03 - 1.81 )	1.36 ( 4.8 )	1.34 ( 1.06 )	0.42 ( 0.01 )
Chronic Graft Versus Host Disease	51	0.75 ( 0.56 - 0.99 )	0.75 ( 4.14 )	0.76 ( 0.6 )	-0.4 ( -0.81 )
Acute Graft Versus Host Disease In Skin	51	0.73 ( 0.55 - 0.97 )	0.73 ( 4.86 )	0.74 ( 0.59 )	-0.43 ( -0.84 )
Bacteraemia	51	2.38 ( 1.77 - 3.19 )	2.37 ( 35.6 )	2.2 ( 1.72 )	1.14 ( 0.71 )
Death	49	0.93 ( 0.7 - 1.24 )	0.93 ( 0.24 )	0.93 ( 0.73 )	-0.1 ( -0.52 )
Epstein-Barr Virus Infection	48	1.1 ( 0.82 - 1.47 )	1.1 ( 0.39 )	1.09 ( 0.85 )	0.13 ( -0.3 )
Epstein-Barr Virus Infection Reactivation	43	4.62 ( 3.3 - 6.47 )	4.6 ( 95.56 )	3.84 ( 2.89 )	1.94 ( 1.46 )
Renal Failure	42	0.86 ( 0.63 - 1.17 )	0.86 ( 0.9 )	0.87 ( 0.67 )	-0.2 ( -0.66 )
Nausea	41	0.86 ( 0.63 - 1.18 )	0.86 ( 0.87 )	0.87 ( 0.67 )	-0.2 ( -0.66 )
Acute Respiratory Distress Syndrome	41	1.53 ( 1.11 - 2.11 )	1.53 ( 6.93 )	1.49 ( 1.14 )	0.57 ( 0.11 )
Autoimmune Haemolytic Anaemia	40	6.97 ( 4.82 - 10.08 )	6.95 ( 144.73 )	5.22 ( 3.84 )	2.38 ( 1.87 )
Staphylococcal Infection	39	1.74 ( 1.25 - 2.42 )	1.73 ( 11 )	1.67 ( 1.26 )	0.74 ( 0.26 )
Aplastic Anaemia	39	3.62 ( 2.56 - 5.11 )	3.61 ( 60.73 )	3.15 ( 2.36 )	1.66 ( 1.16 )
Graft Versus Host Disease In Skin	38	1.03 ( 0.75 - 1.44 )	1.03 ( 0.04 )	1.03 ( 0.78 )	0.05 ( -0.43 )
Pulmonary Hypertension	38	5.55 ( 3.84 - 8 )	5.53 ( 106.48 )	4.42 ( 3.25 )	2.14 ( 1.63 )
Viral Haemorrhagic Cystitis	36	2.59 ( 1.82 - 3.68 )	2.59 ( 30.43 )	2.38 ( 1.77 )	1.25 ( 0.74 )
Graft Versus Host Disease In Gastrointestinal Tract	36	0.9 ( 0.64 - 1.26 )	0.9 ( 0.38 )	0.9 ( 0.68 )	-0.14 ( -0.63 )
Gastrointestinal Haemorrhage	36	2.22 ( 1.57 - 3.15 )	2.22 ( 21.39 )	2.08 ( 1.55 )	1.06 ( 0.55 )
Toxicity To Various Agents	34	0.88 ( 0.62 - 1.24 )	0.88 ( 0.54 )	0.89 ( 0.66 )	-0.18 ( -0.68 )
Pleural Effusion	34	1.33 ( 0.94 - 1.88 )	1.33 ( 2.55 )	1.3 ( 0.97 )	0.38 ( -0.12 )
No Adverse Event	32	5.06 ( 3.41 - 7.51 )	5.04 ( 80.08 )	4.12 ( 2.96 )	2.04 ( 1.48 )
Obliterative Bronchiolitis	31	3.55 ( 2.41 - 5.23 )	3.54 ( 46.84 )	3.1 ( 2.24 )	1.63 ( 1.08 )
Bronchopulmonary Aspergillosis	31	1.16 ( 0.8 - 1.66 )	1.15 ( 0.6 )	1.14 ( 0.84 )	0.19 ( -0.33 )
Polyomavirus Viraemia	31	3.57 ( 2.42 - 5.27 )	3.56 ( 47.35 )	3.12 ( 2.26 )	1.64 ( 1.09 )
Ascites	30	1.5 ( 1.03 - 2.18 )	1.5 ( 4.57 )	1.46 ( 1.07 )	0.54 ( 0 )
Pulmonary Haemorrhage	30	3.01 ( 2.04 - 4.44 )	3 ( 34.12 )	2.7 ( 1.95 )	1.43 ( 0.88 )
Vomiting	29	0.58 ( 0.4 - 0.83 )	0.58 ( 8.73 )	0.59 ( 0.43 )	-0.76 ( -1.29 )
Seizure	29	1.7 ( 1.16 - 2.49 )	1.7 ( 7.55 )	1.63 ( 1.19 )	0.71 ( 0.16 )
Hypertension	29	0.61 ( 0.42 - 0.88 )	0.61 ( 7.01 )	0.62 ( 0.46 )	-0.68 ( -1.22 )
Hepatic Failure	28	1.66 ( 1.12 - 2.44 )	1.65 ( 6.62 )	1.6 ( 1.15 )	0.68 ( 0.11 )
Respiratory Distress	28	1.94 ( 1.31 - 2.87 )	1.94 ( 11.42 )	1.84 ( 1.33 )	0.88 ( 0.32 )
Human Herpesvirus 6 Infection	28	0.99 ( 0.67 - 1.44 )	0.99 ( 0 )	0.99 ( 0.72 )	-0.02 ( -0.57 )
Epstein-Barr Viraemia	28	3.02 ( 2.02 - 4.52 )	3.02 ( 32.09 )	2.71 ( 1.94 )	1.44 ( 0.86 )
Renal Impairment	28	0.55 ( 0.38 - 0.8 )	0.55 ( 9.94 )	0.57 ( 0.41 )	-0.82 ( -1.37 )
Posterior Reversible Encephalopathy Syndrome	27	0.87 ( 0.59 - 1.28 )	0.87 ( 0.53 )	0.87 ( 0.63 )	-0.2 ( -0.75 )
Product Administered To Patient Of Inappropriate Age	27	6.88 ( 4.4 - 10.75 )	6.86 ( 96.36 )	5.18 ( 3.56 )	2.37 ( 1.75 )
Product Use Issue	26	1.14 ( 0.77 - 1.7 )	1.14 ( 0.42 )	1.13 ( 0.81 )	0.18 ( -0.4 )
Herpes Simplex	25	1.97 ( 1.3 - 2.99 )	1.97 ( 10.72 )	1.87 ( 1.32 )	0.9 ( 0.31 )
Incorrect Product Administration Duration	25	106.65 ( 37.11 - 306.51 )	106.37 ( 360 )	15.53 ( 6.42 )	3.96 ( 3.18 )
Clostridium Difficile Colitis	24	1.82 ( 1.19 - 2.77 )	1.82 ( 7.95 )	1.74 ( 1.22 )	0.8 ( 0.19 )
Blood Follicle Stimulating Hormone Increased	24	19.5 ( 10.85 - 35.03 )	19.45 ( 196.08 )	9.61 ( 5.89 )	3.26 ( 2.55 )
Dyspnoea	23	0.66 ( 0.44 - 1.01 )	0.66 ( 3.79 )	0.68 ( 0.48 )	-0.56 ( -1.17 )
Ovarian Failure	23	13.08 ( 7.59 - 22.52 )	13.05 ( 144.88 )	7.82 ( 4.96 )	2.97 ( 2.26 )
Pericardial Effusion	23	1.61 ( 1.05 - 2.46 )	1.6 ( 4.79 )	1.55 ( 1.09 )	0.63 ( 0.02 )
Lung Disorder	22	1.76 ( 1.13 - 2.73 )	1.76 ( 6.52 )	1.69 ( 1.17 )	0.75 ( 0.12 )
Cough	22	0.98 ( 0.63 - 1.5 )	0.98 ( 0.01 )	0.98 ( 0.68 )	-0.03 ( -0.65 )
Blood Luteinising Hormone Increased	22	25.02 ( 12.97 - 48.24 )	24.96 ( 205.2 )	10.71 ( 6.19 )	3.42 ( 2.66 )
Acute Graft Versus Host Disease In Intestine	21	0.66 ( 0.43 - 1.03 )	0.67 ( 3.41 )	0.68 ( 0.47 )	-0.56 ( -1.19 )
Pneumonitis	21	2 ( 1.27 - 3.14 )	2 ( 9.36 )	1.89 ( 1.3 )	0.92 ( 0.27 )
Aspergillus Infection	21	0.96 ( 0.62 - 1.49 )	0.96 ( 0.03 )	0.96 ( 0.67 )	-0.05 ( -0.69 )
Anaemia	20	0.44 ( 0.28 - 0.68 )	0.44 ( 14.17 )	0.45 ( 0.31 )	-1.15 ( -1.79 )
Idiopathic Pneumonia Syndrome	20	4.43 ( 2.71 - 7.24 )	4.42 ( 42.05 )	3.72 ( 2.46 )	1.89 ( 1.2 )
Candida Infection	20	1.72 ( 1.09 - 2.73 )	1.72 ( 5.47 )	1.65 ( 1.12 )	0.73 ( 0.07 )
Ovarian Atrophy	20	113.7 ( 33.78 - 382.71 )	113.47 ( 290.84 )	15.67 ( 5.68 )	3.97 ( 3.11 )
Pain	19	0.95 ( 0.6 - 1.5 )	0.95 ( 0.06 )	0.95 ( 0.64 )	-0.08 ( -0.74 )
Interstitial Lung Disease	19	1.16 ( 0.73 - 1.84 )	1.15 ( 0.37 )	1.15 ( 0.78 )	0.2 ( -0.47 )
Bone Marrow Failure	19	1.17 ( 0.74 - 1.87 )	1.17 ( 0.45 )	1.16 ( 0.79 )	0.21 ( -0.45 )
Pulmonary Alveolar Haemorrhage	19	2.59 ( 1.6 - 4.2 )	2.59 ( 16.07 )	2.38 ( 1.59 )	1.25 ( 0.56 )
Haematuria	19	1.48 ( 0.93 - 2.37 )	1.48 ( 2.76 )	1.44 ( 0.98 )	0.53 ( -0.14 )
Staphylococcal Bacteraemia	19	2.45 ( 1.52 - 3.97 )	2.45 ( 14.26 )	2.27 ( 1.52 )	1.18 ( 0.49 )
Haemorrhage Intracranial	19	3.6 ( 2.19 - 5.9 )	3.59 ( 29.38 )	3.14 ( 2.08 )	1.65 ( 0.95 )
Cardiac Failure	19	0.9 ( 0.57 - 1.43 )	0.9 ( 0.19 )	0.91 ( 0.62 )	-0.14 ( -0.8 )
Enterococcal Infection	19	1.39 ( 0.87 - 2.22 )	1.39 ( 1.91 )	1.36 ( 0.92 )	0.44 ( -0.23 )
Transplantation Complication	18	15.35 ( 8.11 - 29.02 )	15.32 ( 126.82 )	8.54 ( 5.01 )	3.09 ( 2.29 )
Progressive Multifocal Leukoencephalopathy	18	1.57 ( 0.97 - 2.55 )	1.57 ( 3.42 )	1.52 ( 1.02 )	0.61 ( -0.08 )
Malaise	18	1.2 ( 0.74 - 1.94 )	1.2 ( 0.57 )	1.19 ( 0.8 )	0.25 ( -0.44 )
Cytopenia	18	1.34 ( 0.83 - 2.16 )	1.34 ( 1.43 )	1.31 ( 0.88 )	0.39 ( -0.29 )
Toxoplasmosis	18	3.13 ( 1.89 - 5.18 )	3.13 ( 22 )	2.8 ( 1.84 )	1.48 ( 0.77 )
Haemorrhage	17	1.47 ( 0.9 - 2.41 )	1.47 ( 2.34 )	1.43 ( 0.95 )	0.52 ( -0.19 )
Blood Bilirubin Increased	17	0.92 ( 0.56 - 1.49 )	0.92 ( 0.13 )	0.92 ( 0.61 )	-0.12 ( -0.82 )
Premature Menopause	17	11.59 ( 6.26 - 21.47 )	11.57 ( 97.77 )	7.29 ( 4.35 )	2.87 ( 2.06 )
Pneumocystis Jirovecii Pneumonia	17	0.91 ( 0.56 - 1.49 )	0.91 ( 0.13 )	0.92 ( 0.61 )	-0.12 ( -0.82 )
Pneumonia Bacterial	17	1.91 ( 1.15 - 3.15 )	1.9 ( 6.56 )	1.81 ( 1.19 )	0.86 ( 0.14 )
Platelet Count Decreased	16	0.76 ( 0.46 - 1.26 )	0.76 ( 1.16 )	0.77 ( 0.51 )	-0.38 ( -1.09 )
Fungal Infection	16	0.83 ( 0.5 - 1.37 )	0.83 ( 0.55 )	0.84 ( 0.55 )	-0.26 ( -0.98 )
Decreased Appetite	16	0.99 ( 0.6 - 1.64 )	0.99 ( 0 )	0.99 ( 0.65 )	-0.01 ( -0.73 )
Hypothyroidism	16	5.15 ( 2.94 - 9 )	5.14 ( 40.97 )	4.18 ( 2.62 )	2.06 ( 1.28 )
Inappropriate Schedule Of Product Administration	16	11.86 ( 6.26 - 22.45 )	11.84 ( 93.67 )	7.39 ( 4.33 )	2.89 ( 2.05 )
Epstein-Barr Virus Associated Lymphoproliferative Disorder	16	1.12 ( 0.67 - 1.85 )	1.12 ( 0.18 )	1.11 ( 0.73 )	0.15 ( -0.57 )
Jc Virus Infection	16	3.03 ( 1.78 - 5.16 )	3.03 ( 18.44 )	2.72 ( 1.74 )	1.44 ( 0.69 )
Pneumonia Cytomegaloviral	16	1.32 ( 0.79 - 2.19 )	1.32 ( 1.13 )	1.29 ( 0.84 )	0.37 ( -0.36 )
Human Herpesvirus 6 Encephalitis	16	6.49 ( 3.65 - 11.55 )	6.48 ( 53.75 )	4.97 ( 3.07 )	2.31 ( 1.52 )
Immune Thrombocytopenia	16	4.13 ( 2.39 - 7.14 )	4.13 ( 30.51 )	3.52 ( 2.23 )	1.81 ( 1.05 )
Cytomegalovirus Test Positive	15	1.17 ( 0.69 - 1.97 )	1.17 ( 0.33 )	1.16 ( 0.75 )	0.21 ( -0.54 )
Disease Recurrence	15	0.94 ( 0.56 - 1.58 )	0.94 ( 0.05 )	0.95 ( 0.61 )	-0.08 ( -0.82 )
Hypotension	15	0.54 ( 0.32 - 0.9 )	0.54 ( 5.68 )	0.56 ( 0.36 )	-0.85 ( -1.58 )
Pneumonia Fungal	15	1.94 ( 1.13 - 3.3 )	1.93 ( 6.08 )	1.84 ( 1.18 )	0.88 ( 0.12 )
Toxic Skin Eruption	15	7.75 ( 4.21 - 14.27 )	7.74 ( 60.51 )	5.63 ( 3.38 )	2.49 ( 1.66 )
Pulmonary Veno-Occlusive Disease	15	10.23 ( 5.39 - 19.4 )	10.21 ( 77.92 )	6.76 ( 3.95 )	2.76 ( 1.91 )
Stenotrophomonas Infection	15	2.97 ( 1.72 - 5.14 )	2.97 ( 16.68 )	2.68 ( 1.69 )	1.42 ( 0.64 )
Cytomegalovirus Chorioretinitis	15	2.26 ( 1.32 - 3.88 )	2.26 ( 9.3 )	2.11 ( 1.35 )	1.08 ( 0.31 )
Drug Effective For Unapproved Indication	15	3.41 ( 1.96 - 5.93 )	3.4 ( 21.23 )	3 ( 1.89 )	1.59 ( 0.8 )
Right Ventricular Failure	15	8.82 ( 4.72 - 16.45 )	8.8 ( 68.4 )	6.14 ( 3.65 )	2.62 ( 1.78 )
Nephropathy Toxic	14	0.76 ( 0.44 - 1.29 )	0.76 ( 1.05 )	0.77 ( 0.49 )	-0.38 ( -1.15 )
Pulmonary Toxicity	14	3.73 ( 2.09 - 6.65 )	3.72 ( 22.89 )	3.23 ( 1.99 )	1.69 ( 0.88 )
Rash	14	0.55 ( 0.32 - 0.94 )	0.55 ( 4.88 )	0.57 ( 0.36 )	-0.82 ( -1.57 )
Transplant Rejection	14	0.15 ( 0.09 - 0.25 )	0.15 ( 69.83 )	0.15 ( 0.1 )	-2.7 ( -3.45 )
Disseminated Intravascular Coagulation	14	1.33 ( 0.77 - 2.3 )	1.33 ( 1.07 )	1.31 ( 0.83 )	0.39 ( -0.39 )
Bacterial Sepsis	13	1.2 ( 0.68 - 2.1 )	1.2 ( 0.39 )	1.18 ( 0.74 )	0.24 ( -0.56 )
Bacterial Infection	13	0.83 ( 0.48 - 1.45 )	0.83 ( 0.42 )	0.84 ( 0.53 )	-0.25 ( -1.04 )
Mucormycosis	13	1.41 ( 0.8 - 2.48 )	1.41 ( 1.43 )	1.38 ( 0.86 )	0.46 ( -0.34 )
Coagulopathy	13	2.36 ( 1.32 - 4.21 )	2.35 ( 8.9 )	2.19 ( 1.35 )	1.13 ( 0.31 )
Organising Pneumonia	13	1.52 ( 0.86 - 2.67 )	1.52 ( 2.09 )	1.47 ( 0.92 )	0.56 ( -0.25 )
Myelodysplastic Syndrome	13	0.58 ( 0.33 - 1 )	0.58 ( 3.89 )	0.59 ( 0.37 )	-0.76 ( -1.54 )
Clostridium Difficile Infection	13	1.69 ( 0.96 - 2.99 )	1.69 ( 3.33 )	1.63 ( 1.01 )	0.7 ( -0.11 )
Rhinovirus Infection	13	1.93 ( 1.08 - 3.42 )	1.92 ( 5.19 )	1.83 ( 1.13 )	0.87 ( 0.06 )
Bronchiolitis Obliterans Syndrome	13	13.85 ( 6.66 - 28.79 )	13.83 ( 85.37 )	8.08 ( 4.38 )	3.01 ( 2.08 )
Covid-19	13	0.25 ( 0.14 - 0.43 )	0.25 ( 29.47 )	0.26 ( 0.16 )	-1.95 ( -2.73 )
Drug Interaction	12	0.22 ( 0.12 - 0.38 )	0.22 ( 33.43 )	0.23 ( 0.14 )	-2.13 ( -2.94 )
Pulmonary Arterial Hypertension	12	3.72 ( 1.99 - 6.94 )	3.71 ( 19.54 )	3.23 ( 1.91 )	1.69 ( 0.82 )
Cystitis Viral	12	1.84 ( 1.01 - 3.34 )	1.84 ( 4.16 )	1.76 ( 1.07 )	0.81 ( -0.03 )
Pseudomonas Infection	12	0.76 ( 0.42 - 1.35 )	0.76 ( 0.9 )	0.77 ( 0.47 )	-0.38 ( -1.2 )
Mucosal Disorder	12	22.72 ( 9.57 - 53.94 )	22.69 ( 106.66 )	10.3 ( 5 )	3.36 ( 2.35 )
Hepatic Function Abnormal	12	0.9 ( 0.5 - 1.61 )	0.9 ( 0.13 )	0.9 ( 0.56 )	-0.14 ( -0.97 )
Primary Hypogonadism	12	8.18 ( 4.11 - 16.28 )	8.17 ( 51.03 )	5.84 ( 3.28 )	2.55 ( 1.62 )
Encephalitis	12	1.42 ( 0.79 - 2.56 )	1.42 ( 1.37 )	1.39 ( 0.85 )	0.47 ( -0.36 )
Klebsiella Infection	12	0.99 ( 0.55 - 1.77 )	0.99 ( 0 )	0.99 ( 0.61 )	-0.02 ( -0.84 )
Cerebral Haemorrhage	11	1.14 ( 0.62 - 2.1 )	1.14 ( 0.18 )	1.13 ( 0.68 )	0.18 ( -0.68 )
Acute Myeloid Leukaemia	11	0.57 ( 0.31 - 1.04 )	0.57 ( 3.48 )	0.58 ( 0.35 )	-0.78 ( -1.63 )
Device Related Infection	11	1.36 ( 0.73 - 2.51 )	1.36 ( 0.96 )	1.33 ( 0.8 )	0.41 ( -0.45 )
Pulmonary Oedema	11	0.82 ( 0.45 - 1.5 )	0.82 ( 0.43 )	0.83 ( 0.5 )	-0.28 ( -1.13 )
Condition Aggravated	11	0.31 ( 0.17 - 0.56 )	0.31 ( 16.5 )	0.32 ( 0.2 )	-1.63 ( -2.47 )
Enterococcal Bacteraemia	11	3.99 ( 2.07 - 7.69 )	3.98 ( 19.92 )	3.42 ( 1.97 )	1.77 ( 0.86 )
Fatigue	11	0.52 ( 0.29 - 0.95 )	0.52 ( 4.74 )	0.53 ( 0.32 )	-0.9 ( -1.75 )
Neutropenic Colitis	11	2.53 ( 1.34 - 4.77 )	2.53 ( 8.86 )	2.33 ( 1.37 )	1.22 ( 0.33 )
Disease Progression	11	0.44 ( 0.24 - 0.8 )	0.44 ( 7.69 )	0.45 ( 0.27 )	-1.14 ( -1.99 )
Staphylococcal Sepsis	11	1.06 ( 0.58 - 1.95 )	1.06 ( 0.03 )	1.05 ( 0.63 )	0.08 ( -0.78 )
Cystitis	11	2.28 ( 1.22 - 4.29 )	2.28 ( 7 )	2.13 ( 1.26 )	1.09 ( 0.21 )
Rectal Haemorrhage	11	6.46 ( 3.23 - 12.94 )	6.46 ( 36.78 )	4.96 ( 2.77 )	2.31 ( 1.36 )
Hepatotoxicity	10	1.11 ( 0.58 - 2.1 )	1.11 ( 0.09 )	1.1 ( 0.64 )	0.14 ( -0.76 )
Hallucination	10	2.13 ( 1.1 - 4.11 )	2.13 ( 5.31 )	2 ( 1.15 )	1 ( 0.08 )
Respiratory Disorder	10	1.49 ( 0.78 - 2.85 )	1.49 ( 1.5 )	1.45 ( 0.85 )	0.54 ( -0.37 )
Headache	10	0.32 ( 0.17 - 0.59 )	0.32 ( 14.45 )	0.33 ( 0.2 )	-1.6 ( -2.48 )
Hepatic Necrosis	10	2.99 ( 1.53 - 5.85 )	2.99 ( 11.24 )	2.69 ( 1.53 )	1.43 ( 0.49 )
Cerebral Toxoplasmosis	10	1.94 ( 1.01 - 3.72 )	1.93 ( 4.05 )	1.84 ( 1.06 )	0.88 ( -0.04 )
Colitis	10	0.82 ( 0.43 - 1.54 )	0.82 ( 0.39 )	0.83 ( 0.49 )	-0.27 ( -1.17 )
Weight Increased	10	0.82 ( 0.44 - 1.55 )	0.82 ( 0.37 )	0.83 ( 0.49 )	-0.27 ( -1.16 )
Hypogammaglobulinaemia	10	0.9 ( 0.47 - 1.69 )	0.9 ( 0.12 )	0.9 ( 0.53 )	-0.15 ( -1.04 )
Agranulocytosis	10	0.89 ( 0.47 - 1.67 )	0.89 ( 0.14 )	0.89 ( 0.52 )	-0.16 ( -1.06 )
Escherichia Infection	10	0.83 ( 0.44 - 1.57 )	0.83 ( 0.33 )	0.84 ( 0.49 )	-0.25 ( -1.15 )
Gastrointestinal Infection	10	3.48 ( 1.76 - 6.86 )	3.47 ( 14.63 )	3.05 ( 1.73 )	1.61 ( 0.66 )
Skin Hyperpigmentation	10	6.08 ( 2.95 - 12.53 )	6.08 ( 31.27 )	4.74 ( 2.59 )	2.25 ( 1.26 )
Inappropriate Antidiuretic Hormone Secretion	10	2.03 ( 1.05 - 3.91 )	2.03 ( 4.65 )	1.92 ( 1.11 )	0.94 ( 0.02 )
Viruria	10	4.15 ( 2.08 - 8.3 )	4.15 ( 19.24 )	3.53 ( 1.98 )	1.82 ( 0.86 )
Erythema	9	0.98 ( 0.5 - 1.91 )	0.98 ( 0.01 )	0.98 ( 0.56 )	-0.03 ( -0.97 )
Cardiotoxicity	9	1.99 ( 1 - 3.97 )	1.99 ( 3.97 )	1.89 ( 1.06 )	0.92 ( -0.05 )
Engraft Failure	9	1.42 ( 0.72 - 2.8 )	1.42 ( 1.03 )	1.39 ( 0.78 )	0.47 ( -0.48 )
Transaminases Increased	9	1.17 ( 0.6 - 2.3 )	1.17 ( 0.21 )	1.16 ( 0.66 )	0.21 ( -0.73 )
Graft Versus Host Disease In Liver	9	0.86 ( 0.44 - 1.67 )	0.86 ( 0.21 )	0.86 ( 0.49 )	-0.21 ( -1.15 )
Oropharyngeal Pain	9	2.1 ( 1.05 - 4.2 )	2.1 ( 4.61 )	1.98 ( 1.11 )	0.98 ( 0.02 )
Cardiac Arrest	9	0.7 ( 0.36 - 1.36 )	0.7 ( 1.12 )	0.71 ( 0.41 )	-0.49 ( -1.42 )
Liver Disorder	9	0.83 ( 0.42 - 1.62 )	0.83 ( 0.31 )	0.84 ( 0.48 )	-0.26 ( -1.19 )
Tachycardia	9	0.6 ( 0.31 - 1.17 )	0.6 ( 2.27 )	0.62 ( 0.35 )	-0.7 ( -1.63 )
Viral Infection	9	0.91 ( 0.46 - 1.77 )	0.91 ( 0.08 )	0.91 ( 0.52 )	-0.13 ( -1.07 )
Enterobacter Bacteraemia	9	12.78 ( 5.38 - 30.33 )	12.76 ( 55.77 )	7.72 ( 3.75 )	2.95 ( 1.85 )
Skin Lesion	9	1.46 ( 0.74 - 2.88 )	1.46 ( 1.2 )	1.42 ( 0.8 )	0.51 ( -0.44 )
Hepatic Cytolysis	9	2.32 ( 1.16 - 4.66 )	2.32 ( 5.96 )	2.16 ( 1.21 )	1.11 ( 0.14 )
Gastrointestinal Toxicity	9	2.25 ( 1.12 - 4.52 )	2.25 ( 5.54 )	2.11 ( 1.18 )	1.07 ( 0.11 )
Engraftment Syndrome	9	0.79 ( 0.4 - 1.54 )	0.79 ( 0.48 )	0.8 ( 0.46 )	-0.32 ( -1.26 )
Evans Syndrome	9	11.79 ( 5.04 - 27.6 )	11.78 ( 52.49 )	7.37 ( 3.62 )	2.88 ( 1.79 )
Pneumonia Viral	9	2.36 ( 1.17 - 4.74 )	2.36 ( 6.18 )	2.19 ( 1.22 )	1.13 ( 0.16 )
Guillain-Barre Syndrome	9	1.45 ( 0.73 - 2.86 )	1.45 ( 1.14 )	1.41 ( 0.8 )	0.5 ( -0.46 )
Acute Myeloid Leukaemia Recurrent	9	0.84 ( 0.43 - 1.63 )	0.84 ( 0.27 )	0.84 ( 0.48 )	-0.24 ( -1.18 )
Transplant Dysfunction	9	0.47 ( 0.24 - 0.91 )	0.47 ( 5.2 )	0.49 ( 0.28 )	-1.04 ( -1.97 )
Bradycardia	9	2.39 ( 1.19 - 4.81 )	2.39 ( 6.4 )	2.22 ( 1.24 )	1.15 ( 0.18 )
Hypoalbuminaemia	9	2.02 ( 1.01 - 4.03 )	2.02 ( 4.12 )	1.91 ( 1.07 )	0.93 ( -0.03 )
Stem Cell Transplant	9	1.16 ( 0.59 - 2.28 )	1.16 ( 0.19 )	1.15 ( 0.65 )	0.2 ( -0.74 )
Encephalitis Viral	8	0.91 ( 0.45 - 1.86 )	0.91 ( 0.06 )	0.92 ( 0.51 )	-0.12 ( -1.11 )
Second Primary Malignancy	8	2.1 ( 1.01 - 4.37 )	2.09 ( 4.08 )	1.97 ( 1.07 )	0.98 ( -0.04 )
Haematemesis	8	2.57 ( 1.22 - 5.41 )	2.57 ( 6.66 )	2.36 ( 1.27 )	1.24 ( 0.21 )
Melaena	8	1.64 ( 0.79 - 3.39 )	1.64 ( 1.83 )	1.58 ( 0.86 )	0.66 ( -0.34 )
Mouth Ulceration	8	1.36 ( 0.66 - 2.8 )	1.36 ( 0.71 )	1.33 ( 0.73 )	0.42 ( -0.58 )
Chronic Graft Versus Host Disease In Skin	8	0.44 ( 0.22 - 0.89 )	0.44 ( 5.55 )	0.45 ( 0.25 )	-1.14 ( -2.11 )
Escherichia Sepsis	8	1.84 ( 0.89 - 3.82 )	1.84 ( 2.77 )	1.76 ( 0.95 )	0.81 ( -0.2 )
Disseminated Tuberculosis	8	3.59 ( 1.67 - 7.69 )	3.58 ( 12.31 )	3.13 ( 1.66 )	1.65 ( 0.6 )
Neurotoxicity	8	0.42 ( 0.21 - 0.85 )	0.42 ( 6.16 )	0.44 ( 0.24 )	-1.19 ( -2.17 )
Encephalopathy	8	0.38 ( 0.19 - 0.77 )	0.38 ( 7.87 )	0.39 ( 0.22 )	-1.34 ( -2.31 )
Myelosuppression	8	1.27 ( 0.62 - 2.61 )	1.27 ( 0.43 )	1.25 ( 0.69 )	0.33 ( -0.67 )
Hepatitis	8	1.6 ( 0.78 - 3.31 )	1.6 ( 1.65 )	1.55 ( 0.84 )	0.63 ( -0.37 )
Infection Reactivation	8	1.53 ( 0.74 - 3.16 )	1.53 ( 1.35 )	1.49 ( 0.81 )	0.57 ( -0.43 )
Generalised Oedema	8	1.77 ( 0.85 - 3.66 )	1.77 ( 2.42 )	1.7 ( 0.92 )	0.76 ( -0.25 )
Circulatory Collapse	8	1.79 ( 0.86 - 3.71 )	1.79 ( 2.53 )	1.72 ( 0.93 )	0.78 ( -0.23 )
Lymphopenia	8	0.65 ( 0.32 - 1.31 )	0.65 ( 1.47 )	0.66 ( 0.37 )	-0.6 ( -1.58 )
Cellulitis	8	0.88 ( 0.43 - 1.8 )	0.88 ( 0.12 )	0.89 ( 0.49 )	-0.17 ( -1.16 )
Varicella Zoster Virus Infection	8	1.02 ( 0.5 - 2.07 )	1.02 ( 0 )	1.02 ( 0.56 )	0.02 ( -0.97 )
Cytokine Release Syndrome	8	0.24 ( 0.12 - 0.48 )	0.24 ( 18.87 )	0.25 ( 0.14 )	-1.99 ( -2.96 )
Metastasis	7	2.59 ( 1.17 - 5.74 )	2.59 ( 5.93 )	2.38 ( 1.22 )	1.25 ( 0.16 )
Pericarditis	7	1.51 ( 0.7 - 3.27 )	1.51 ( 1.1 )	1.47 ( 0.77 )	0.55 ( -0.51 )
Shock Haemorrhagic	7	1.4 ( 0.65 - 3.03 )	1.4 ( 0.74 )	1.37 ( 0.72 )	0.46 ( -0.61 )
Candida Sepsis	7	2.43 ( 1.1 - 5.37 )	2.43 ( 5.16 )	2.25 ( 1.16 )	1.17 ( 0.08 )
Dermatitis Bullous	7	4.97 ( 2.14 - 11.53 )	4.96 ( 17.16 )	4.07 ( 2.01 )	2.02 ( 0.88 )
Respiratory Syncytial Virus Infection	7	1.1 ( 0.51 - 2.37 )	1.1 ( 0.06 )	1.1 ( 0.58 )	0.13 ( -0.92 )
Pruritus	7	0.71 ( 0.33 - 1.52 )	0.71 ( 0.77 )	0.72 ( 0.38 )	-0.46 ( -1.51 )
Rash Maculo-Papular	7	1.05 ( 0.49 - 2.26 )	1.05 ( 0.02 )	1.05 ( 0.55 )	0.07 ( -0.98 )
Cholestasis	7	0.65 ( 0.31 - 1.38 )	0.65 ( 1.26 )	0.66 ( 0.35 )	-0.59 ( -1.63 )
Hyperbilirubinaemia	7	0.86 ( 0.4 - 1.85 )	0.86 ( 0.14 )	0.87 ( 0.46 )	-0.2 ( -1.25 )
Pseudomonal Sepsis	7	1.3 ( 0.6 - 2.79 )	1.29 ( 0.44 )	1.27 ( 0.67 )	0.35 ( -0.71 )
Encephalitis Cytomegalovirus	7	2.34 ( 1.06 - 5.15 )	2.34 ( 4.7 )	2.17 ( 1.12 )	1.12 ( 0.03 )
Dehydration	7	0.5 ( 0.24 - 1.07 )	0.5 ( 3.35 )	0.52 ( 0.28 )	-0.95 ( -1.99 )
General Physical Health Deterioration	7	0.5 ( 0.23 - 1.06 )	0.5 ( 3.44 )	0.51 ( 0.27 )	-0.96 ( -2 )
Human Polyomavirus Infection	7	1.45 ( 0.67 - 3.15 )	1.45 ( 0.91 )	1.42 ( 0.74 )	0.5 ( -0.56 )
Epistaxis	7	1.51 ( 0.7 - 3.27 )	1.51 ( 1.1 )	1.47 ( 0.77 )	0.55 ( -0.51 )
Basal Cell Carcinoma	7	0.83 ( 0.39 - 1.77 )	0.83 ( 0.24 )	0.84 ( 0.44 )	-0.26 ( -1.31 )
Aplasia Pure Red Cell	7	1.03 ( 0.48 - 2.2 )	1.03 ( 0 )	1.03 ( 0.54 )	0.04 ( -1.02 )
Bone Marrow Transplant	7	3.51 ( 1.55 - 7.91 )	3.5 ( 10.39 )	3.08 ( 1.56 )	1.62 ( 0.51 )
Intentional Product Use Issue	7	0.32 ( 0.15 - 0.68 )	0.32 ( 9.83 )	0.33 ( 0.18 )	-1.58 ( -2.61 )
Chronic Kidney Disease	7	0.48 ( 0.23 - 1.03 )	0.48 ( 3.74 )	0.5 ( 0.27 )	-1 ( -2.04 )
Pulmonary Tuberculosis	7	3.85 ( 1.69 - 8.73 )	3.84 ( 12.01 )	3.32 ( 1.67 )	1.73 ( 0.61 )
Acute Hepatic Failure	7	1.4 ( 0.65 - 3.03 )	1.4 ( 0.74 )	1.37 ( 0.72 )	0.46 ( -0.61 )
Systemic Candida	7	1.47 ( 0.68 - 3.19 )	1.47 ( 0.97 )	1.43 ( 0.75 )	0.52 ( -0.55 )
Adenoviral Haemorrhagic Cystitis	7	2.84 ( 1.27 - 6.32 )	2.84 ( 7.14 )	2.57 ( 1.32 )	1.36 ( 0.27 )
Escherichia Bacteraemia	7	2.17 ( 0.99 - 4.76 )	2.17 ( 3.9 )	2.03 ( 1.05 )	1.02 ( -0.06 )
Hypoxia	7	0.41 ( 0.19 - 0.86 )	0.41 ( 5.88 )	0.42 ( 0.23 )	-1.25 ( -2.28 )
Bronchiectasis	7	2.02 ( 0.92 - 4.42 )	2.02 ( 3.22 )	1.91 ( 0.99 )	0.93 ( -0.15 )
Growth Hormone Deficiency	7	10.84 ( 4.2 - 27.96 )	10.83 ( 38.18 )	7.01 ( 3.17 )	2.81 ( 1.59 )
Capillary Leak Syndrome	7	1.61 ( 0.74 - 3.5 )	1.61 ( 1.48 )	1.56 ( 0.81 )	0.64 ( -0.43 )
Nephrotic Syndrome	7	1.42 ( 0.66 - 3.07 )	1.42 ( 0.8 )	1.39 ( 0.73 )	0.47 ( -0.59 )
Cardiac Dysfunction	7	17.03 ( 5.97 - 48.57 )	17.02 ( 52.78 )	9.01 ( 3.75 )	3.17 ( 1.91 )
Altered State Of Consciousness	7	0.99 ( 0.46 - 2.13 )	0.99 ( 0 )	0.99 ( 0.52 )	-0.01 ( -1.06 )
Productive Cough	7	1.3 ( 0.6 - 2.79 )	1.29 ( 0.44 )	1.27 ( 0.67 )	0.35 ( -0.71 )
Pneumonia Klebsiella	7	1.35 ( 0.63 - 2.92 )	1.35 ( 0.6 )	1.33 ( 0.7 )	0.41 ( -0.65 )
Cytomegalovirus Urinary Tract Infection	7	14.9 ( 5.4 - 41.11 )	14.89 ( 48.39 )	8.41 ( 3.6 )	3.07 ( 1.82 )
Pneumonia Respiratory Syncytial Viral	6	2.22 ( 0.95 - 5.2 )	2.22 ( 3.56 )	2.08 ( 1.02 )	1.06 ( -0.1 )
Cardiac Failure Acute	6	1.65 ( 0.71 - 3.81 )	1.65 ( 1.39 )	1.59 ( 0.79 )	0.67 ( -0.48 )
Upper Respiratory Tract Infection	6	0.77 ( 0.34 - 1.75 )	0.77 ( 0.38 )	0.78 ( 0.4 )	-0.35 ( -1.47 )
Leukaemia Recurrent	6	0.67 ( 0.3 - 1.52 )	0.67 ( 0.93 )	0.68 ( 0.35 )	-0.55 ( -1.66 )
Hepatocellular Injury	6	1.01 ( 0.44 - 2.3 )	1.01 ( 0 )	1.01 ( 0.51 )	0.02 ( -1.11 )
Bone Marrow Transplant Rejection	6	1.67 ( 0.72 - 3.87 )	1.67 ( 1.48 )	1.61 ( 0.8 )	0.69 ( -0.46 )
Squamous Cell Carcinoma	6	0.85 ( 0.37 - 1.93 )	0.85 ( 0.15 )	0.86 ( 0.43 )	-0.22 ( -1.34 )
Gastrointestinal Disorder	6	0.5 ( 0.22 - 1.13 )	0.5 ( 2.86 )	0.52 ( 0.26 )	-0.95 ( -2.06 )
Diarrhoea Infectious	6	6.39 ( 2.5 - 16.32 )	6.38 ( 19.81 )	4.91 ( 2.24 )	2.3 ( 1.05 )
Gastroenteritis	6	1.11 ( 0.49 - 2.54 )	1.11 ( 0.06 )	1.1 ( 0.55 )	0.14 ( -0.99 )
Influenza	6	0.61 ( 0.27 - 1.38 )	0.61 ( 1.43 )	0.62 ( 0.32 )	-0.68 ( -1.79 )
Staphylococcus Test Positive	6	6.81 ( 2.64 - 17.56 )	6.81 ( 21.24 )	5.15 ( 2.33 )	2.36 ( 1.11 )
Hilar Lymphadenopathy	6	12.77 ( 4.43 - 36.82 )	12.76 ( 37.18 )	7.72 ( 3.18 )	2.95 ( 1.63 )
Lung Consolidation	6	1.5 ( 0.65 - 3.46 )	1.5 ( 0.92 )	1.46 ( 0.73 )	0.55 ( -0.59 )
Lymphadenopathy Mediastinal	6	6.81 ( 2.64 - 17.56 )	6.81 ( 21.24 )	5.15 ( 2.33 )	2.36 ( 1.11 )
Oedema Peripheral	6	0.42 ( 0.19 - 0.94 )	0.42 ( 4.74 )	0.43 ( 0.22 )	-1.21 ( -2.32 )
Oedema	6	0.5 ( 0.22 - 1.12 )	0.5 ( 2.95 )	0.51 ( 0.26 )	-0.96 ( -2.07 )
Lung Transplant	6	17.03 ( 5.49 - 52.81 )	17.02 ( 45.24 )	9.01 ( 3.49 )	3.17 ( 1.82 )
Abdominal Pain	6	0.2 ( 0.09 - 0.44 )	0.2 ( 19.23 )	0.21 ( 0.11 )	-2.27 ( -3.36 )
Diffuse Alveolar Damage	6	3.41 ( 1.42 - 8.18 )	3.4 ( 8.49 )	3 ( 1.44 )	1.59 ( 0.4 )
Atrial Flutter	6	2.49 ( 1.06 - 5.87 )	2.49 ( 4.67 )	2.3 ( 1.12 )	1.2 ( 0.03 )
Upper Gastrointestinal Haemorrhage	6	2.84 ( 1.2 - 6.74 )	2.84 ( 6.12 )	2.57 ( 1.25 )	1.36 ( 0.19 )
Hepatic Enzyme Increased	6	0.72 ( 0.32 - 1.64 )	0.72 ( 0.6 )	0.74 ( 0.37 )	-0.44 ( -1.56 )
Fungaemia	6	1.52 ( 0.66 - 3.52 )	1.52 ( 0.99 )	1.48 ( 0.74 )	0.57 ( -0.57 )
Amenorrhoea	6	5.11 ( 2.05 - 12.72 )	5.11 ( 15.24 )	4.16 ( 1.94 )	2.06 ( 0.83 )
Klebsiella Bacteraemia	6	2.13 ( 0.91 - 4.97 )	2.13 ( 3.19 )	2 ( 0.98 )	1 ( -0.16 )
Streptococcal Bacteraemia	6	2.08 ( 0.89 - 4.87 )	2.08 ( 3.02 )	1.97 ( 0.97 )	0.98 ( -0.18 )
Adrenal Haemorrhage	6	20.44 ( 6.24 - 66.98 )	20.42 ( 50.38 )	9.83 ( 3.64 )	3.3 ( 1.92 )
Product Administration Error	6	6.81 ( 2.64 - 17.56 )	6.81 ( 21.24 )	5.15 ( 2.33 )	2.36 ( 1.11 )
Cardiomyopathy	6	1.04 ( 0.46 - 2.38 )	1.04 ( 0.01 )	1.04 ( 0.52 )	0.06 ( -1.07 )
Liver Injury	6	1.96 ( 0.84 - 4.57 )	1.96 ( 2.55 )	1.86 ( 0.92 )	0.9 ( -0.26 )
Epilepsy	6	1.17 ( 0.51 - 2.69 )	1.17 ( 0.14 )	1.16 ( 0.58 )	0.22 ( -0.91 )
Confusional State	6	0.28 ( 0.12 - 0.62 )	0.28 ( 11.02 )	0.29 ( 0.15 )	-1.78 ( -2.88 )
Inflammation	6	0.87 ( 0.38 - 1.97 )	0.87 ( 0.12 )	0.87 ( 0.44 )	-0.2 ( -1.32 )
Enterobacter Sepsis	6	3.78 ( 1.56 - 9.17 )	3.78 ( 10.05 )	3.28 ( 1.56 )	1.71 ( 0.51 )
Urinary Tract Infection	6	0.21 ( 0.09 - 0.46 )	0.21 ( 18.04 )	0.22 ( 0.11 )	-2.21 ( -3.3 )
Disseminated Bacillus Calmette-Guerin Infection	6	5.68 ( 2.25 - 14.3 )	5.67 ( 17.33 )	4.5 ( 2.08 )	2.17 ( 0.94 )
Polyneuropathy	6	1.76 ( 0.76 - 4.08 )	1.76 ( 1.79 )	1.69 ( 0.84 )	0.76 ( -0.39 )
Herpes Virus Infection	6	1.17 ( 0.51 - 2.69 )	1.17 ( 0.14 )	1.16 ( 0.58 )	0.22 ( -0.91 )
Dermatitis	6	2.55 ( 1.08 - 6.03 )	2.55 ( 4.93 )	2.35 ( 1.15 )	1.23 ( 0.06 )
Enteritis	6	1.16 ( 0.51 - 2.65 )	1.16 ( 0.12 )	1.15 ( 0.58 )	0.2 ( -0.93 )
Alpha Haemolytic Streptococcal Infection	6	2.76 ( 1.17 - 6.54 )	2.76 ( 5.8 )	2.51 ( 1.22 )	1.33 ( 0.16 )
Human Herpesvirus 6 Infection Reactivation	6	1.89 ( 0.81 - 4.4 )	1.89 ( 2.27 )	1.8 ( 0.89 )	0.85 ( -0.3 )
Tubulointerstitial Nephritis	6	0.49 ( 0.22 - 1.09 )	0.49 ( 3.17 )	0.5 ( 0.25 )	-1 ( -2.11 )
Growth Retardation	6	1.4 ( 0.61 - 3.22 )	1.4 ( 0.63 )	1.37 ( 0.68 )	0.45 ( -0.68 )
Drug Resistance	6	0.39 ( 0.17 - 0.88 )	0.39 ( 5.56 )	0.4 ( 0.21 )	-1.3 ( -2.41 )
Escherichia Test Positive	6	10.22 ( 3.71 - 28.12 )	10.21 ( 31.16 )	6.76 ( 2.9 )	2.76 ( 1.46 )
Portal Vein Thrombosis	6	3.93 ( 1.62 - 9.55 )	3.93 ( 10.64 )	3.38 ( 1.61 )	1.76 ( 0.56 )
Stenotrophomonas Bacteraemia	6	51.09 ( 10.31 - 253.17 )	51.06 ( 73.62 )	13.51 ( 3.54 )	3.76 ( 2.3 )
Renal Tubular Injury	6	1.31 ( 0.57 - 3 )	1.31 ( 0.41 )	1.29 ( 0.64 )	0.36 ( -0.77 )
Pulmonary Fibrosis	5	1.52 ( 0.61 - 3.8 )	1.52 ( 0.82 )	1.48 ( 0.69 )	0.56 ( -0.67 )
Pericarditis Constrictive	5	5.68 ( 2.06 - 15.62 )	5.67 ( 14.44 )	4.5 ( 1.93 )	2.17 ( 0.84 )
Graft Complication	5	2.08 ( 0.82 - 5.26 )	2.08 ( 2.48 )	1.96 ( 0.9 )	0.97 ( -0.28 )
Brain Abscess	5	1.44 ( 0.58 - 3.6 )	1.44 ( 0.63 )	1.41 ( 0.66 )	0.49 ( -0.74 )
Lung Abscess	5	5.01 ( 1.85 - 13.58 )	5.01 ( 12.39 )	4.1 ( 1.78 )	2.03 ( 0.71 )
Adenoviral Hepatitis	5	1.77 ( 0.71 - 4.46 )	1.77 ( 1.53 )	1.7 ( 0.79 )	0.77 ( -0.48 )
Brain Oedema	5	0.75 ( 0.31 - 1.84 )	0.75 ( 0.39 )	0.76 ( 0.36 )	-0.39 ( -1.6 )
Hyponatraemia	5	0.39 ( 0.16 - 0.95 )	0.39 ( 4.66 )	0.4 ( 0.19 )	-1.31 ( -2.5 )
Cognitive Disorder	5	2.03 ( 0.8 - 5.12 )	2.03 ( 2.32 )	1.92 ( 0.88 )	0.94 ( -0.31 )
Delirium	5	0.86 ( 0.35 - 2.11 )	0.86 ( 0.11 )	0.87 ( 0.41 )	-0.21 ( -1.42 )
Electrolyte Imbalance	5	1.67 ( 0.67 - 4.18 )	1.67 ( 1.22 )	1.61 ( 0.75 )	0.69 ( -0.55 )
Neutrophil Count Decreased	5	0.59 ( 0.24 - 1.44 )	0.59 ( 1.37 )	0.6 ( 0.29 )	-0.73 ( -1.93 )
Hepatic Cirrhosis	5	1.93 ( 0.77 - 4.88 )	1.93 ( 2.03 )	1.84 ( 0.85 )	0.88 ( -0.37 )
Spinal Cord Disorder	5	5.68 ( 2.06 - 15.62 )	5.67 ( 14.44 )	4.5 ( 1.93 )	2.17 ( 0.84 )
Respiratory Tract Infection	5	0.75 ( 0.31 - 1.84 )	0.75 ( 0.39 )	0.76 ( 0.36 )	-0.39 ( -1.6 )
Atrial Fibrillation	5	0.32 ( 0.13 - 0.77 )	0.32 ( 7.11 )	0.33 ( 0.16 )	-1.59 ( -2.78 )
Herpes Zoster	5	0.26 ( 0.11 - 0.62 )	0.26 ( 10.65 )	0.27 ( 0.13 )	-1.9 ( -3.09 )
White Blood Cell Count Decreased	5	0.32 ( 0.13 - 0.78 )	0.32 ( 7 )	0.33 ( 0.16 )	-1.58 ( -2.77 )
Klebsiella Sepsis	5	1.23 ( 0.5 - 3.06 )	1.23 ( 0.21 )	1.22 ( 0.57 )	0.28 ( -0.94 )
Tuberculosis	5	1.2 ( 0.48 - 2.97 )	1.2 ( 0.15 )	1.19 ( 0.55 )	0.25 ( -0.98 )
Alanine Aminotransferase Increased	5	0.24 ( 0.1 - 0.58 )	0.24 ( 11.91 )	0.25 ( 0.12 )	-2 ( -3.19 )
Gastroenteritis Adenovirus	5	2.43 ( 0.95 - 6.21 )	2.43 ( 3.69 )	2.25 ( 1.03 )	1.17 ( -0.09 )
Oral Disorder	5	2.66 ( 1.04 - 6.83 )	2.66 ( 4.48 )	2.44 ( 1.11 )	1.28 ( 0.02 )
Gamma-Glutamyltransferase Increased	5	0.66 ( 0.27 - 1.61 )	0.66 ( 0.85 )	0.67 ( 0.32 )	-0.57 ( -1.78 )
Traumatic Lung Injury	5	14.19 ( 4.33 - 46.51 )	14.18 ( 33.42 )	8.19 ( 3.03 )	3.03 ( 1.59 )
Hepatomegaly	5	0.87 ( 0.35 - 2.13 )	0.87 ( 0.09 )	0.87 ( 0.41 )	-0.19 ( -1.4 )
Pneumothorax	5	0.88 ( 0.36 - 2.16 )	0.88 ( 0.08 )	0.88 ( 0.42 )	-0.18 ( -1.39 )
Mycobacterial Infection	5	1.27 ( 0.51 - 3.15 )	1.27 ( 0.27 )	1.25 ( 0.58 )	0.32 ( -0.9 )
Hyperammonaemia	5	2.94 ( 1.14 - 7.59 )	2.93 ( 5.44 )	2.65 ( 1.2 )	1.41 ( 0.13 )
Cardiac Tamponade	5	1.04 ( 0.42 - 2.56 )	1.04 ( 0.01 )	1.04 ( 0.49 )	0.05 ( -1.17 )
Systemic Mycosis	5	0.98 ( 0.4 - 2.41 )	0.98 ( 0 )	0.98 ( 0.46 )	-0.03 ( -1.25 )
Haematotoxicity	5	0.52 ( 0.21 - 1.27 )	0.52 ( 2.12 )	0.54 ( 0.25 )	-0.9 ( -2.1 )
Cholecystitis	5	2.18 ( 0.86 - 5.54 )	2.18 ( 2.84 )	2.05 ( 0.94 )	1.03 ( -0.22 )
Fusarium Infection	5	2.75 ( 1.07 - 7.06 )	2.75 ( 4.78 )	2.5 ( 1.14 )	1.32 ( 0.05 )
Somnolence	5	0.7 ( 0.29 - 1.71 )	0.7 ( 0.63 )	0.71 ( 0.34 )	-0.5 ( -1.7 )
Hypercalcaemia	5	1.55 ( 0.62 - 3.87 )	1.55 ( 0.89 )	1.5 ( 0.7 )	0.59 ( -0.65 )
Thyroiditis	5	7.74 ( 2.69 - 22.28 )	7.74 ( 20.16 )	5.63 ( 2.32 )	2.49 ( 1.12 )
Intestinal Haemorrhage	5	3.87 ( 1.47 - 10.22 )	3.87 ( 8.67 )	3.34 ( 1.48 )	1.74 ( 0.44 )
Kaposi'S Sarcoma	5	0.5 ( 0.21 - 1.23 )	0.5 ( 2.38 )	0.52 ( 0.25 )	-0.95 ( -2.15 )
Lower Gastrointestinal Haemorrhage	5	3.15 ( 1.21 - 8.19 )	3.15 ( 6.2 )	2.82 ( 1.27 )	1.49 ( 0.21 )
Autoimmune Thyroiditis	5	3.27 ( 1.26 - 8.53 )	3.27 ( 6.62 )	2.91 ( 1.3 )	1.54 ( 0.26 )
Parainfluenzae Virus Infection	5	0.95 ( 0.38 - 2.33 )	0.95 ( 0.01 )	0.95 ( 0.45 )	-0.08 ( -1.29 )
Adenovirus Reactivation	5	1.74 ( 0.69 - 4.36 )	1.74 ( 1.42 )	1.67 ( 0.77 )	0.74 ( -0.5 )
Large Granular Lymphocytosis	5	17.03 ( 4.93 - 58.83 )	17.02 ( 37.7 )	9.01 ( 3.19 )	3.17 ( 1.71 )
Acute Respiratory Failure	5	0.55 ( 0.23 - 1.34 )	0.55 ( 1.8 )	0.56 ( 0.27 )	-0.83 ( -2.03 )
Arthralgia	5	0.49 ( 0.2 - 1.2 )	0.49 ( 2.55 )	0.51 ( 0.24 )	-0.98 ( -2.18 )
Meningitis	5	2.13 ( 0.84 - 5.39 )	2.13 ( 2.66 )	2 ( 0.92 )	1 ( -0.25 )
Non-Hodgkin'S Lymphoma	5	1.52 ( 0.61 - 3.8 )	1.52 ( 0.82 )	1.48 ( 0.69 )	0.56 ( -0.67 )
Platelet Transfusion	5	9.46 ( 3.17 - 28.23 )	9.46 ( 24.31 )	6.44 ( 2.58 )	2.69 ( 1.29 )
Hyperfibrinogenaemia	5	17.03 ( 4.93 - 58.83 )	17.02 ( 37.7 )	9.01 ( 3.19 )	3.17 ( 1.71 )
Retinopathy Haemorrhagic	5	14.19 ( 4.33 - 46.51 )	14.18 ( 33.42 )	8.19 ( 3.03 )	3.03 ( 1.59 )
Neck Pain	5	4.26 ( 1.6 - 11.34 )	4.25 ( 9.96 )	3.6 ( 1.59 )	1.85 ( 0.54 )
Febrile Bone Marrow Aplasia	5	2.58 ( 1.01 - 6.61 )	2.58 ( 4.2 )	2.37 ( 1.08 )	1.25 ( -0.02 )
Urinary Bladder Toxicity	5	Inf ( NaN - Inf )	Inf ( 85.1 )	18.02 ( 0 )	4.17 ( 2.51 )
Surgical Procedure Repeated	5	6.55 ( 2.33 - 18.37 )	6.55 ( 16.97 )	5.01 ( 2.11 )	2.32 ( 0.97 )
Oral Toxicity	4	Inf ( NaN - Inf )	Inf ( 68.08 )	18.02 ( 0 )	4.17 ( 2.35 )
Hypokalaemia	4	0.45 ( 0.17 - 1.22 )	0.45 ( 2.61 )	0.47 ( 0.2 )	-1.1 ( -2.42 )
Meningitis Tuberculous	4	4.86 ( 1.6 - 14.78 )	4.86 ( 9.55 )	4 ( 1.58 )	2 ( 0.55 )
Tooth Development Disorder	4	22.7 ( 5.08 - 101.45 )	22.69 ( 35.55 )	10.3 ( 2.94 )	3.36 ( 1.72 )
Acute Lymphocytic Leukaemia	4	0.96 ( 0.35 - 2.63 )	0.96 ( 0.01 )	0.96 ( 0.41 )	-0.06 ( -1.39 )
Fall	4	0.59 ( 0.22 - 1.59 )	0.59 ( 1.13 )	0.6 ( 0.26 )	-0.74 ( -2.05 )
Cardiogenic Shock	4	0.93 ( 0.34 - 2.55 )	0.93 ( 0.02 )	0.94 ( 0.4 )	-0.1 ( -1.43 )
Thrombotic Thrombocytopenic Purpura	4	1.15 ( 0.42 - 3.18 )	1.15 ( 0.08 )	1.14 ( 0.49 )	0.19 ( -1.15 )
Muscular Weakness	4	0.67 ( 0.25 - 1.81 )	0.67 ( 0.64 )	0.68 ( 0.29 )	-0.56 ( -1.88 )
Laryngitis Fungal	4	4.54 ( 1.51 - 13.68 )	4.54 ( 8.71 )	3.79 ( 1.51 )	1.92 ( 0.48 )
Tooth Hypoplasia	4	9.73 ( 2.85 - 33.24 )	9.73 ( 19.93 )	6.55 ( 2.34 )	2.71 ( 1.18 )
Renal Injury	4	1.31 ( 0.47 - 3.62 )	1.31 ( 0.27 )	1.29 ( 0.55 )	0.36 ( -0.98 )
Cardio-Respiratory Arrest	4	0.86 ( 0.32 - 2.35 )	0.86 ( 0.08 )	0.87 ( 0.37 )	-0.2 ( -1.53 )
Neutropenic Sepsis	4	0.92 ( 0.34 - 2.52 )	0.92 ( 0.03 )	0.92 ( 0.4 )	-0.11 ( -1.44 )
Hallucination, Auditory	4	5.24 ( 1.71 - 16.07 )	5.24 ( 10.49 )	4.24 ( 1.66 )	2.08 ( 0.63 )
Liver Function Test Abnormal	4	0.26 ( 0.1 - 0.7 )	0.26 ( 8.16 )	0.27 ( 0.12 )	-1.87 ( -3.17 )
Shock	4	0.56 ( 0.21 - 1.52 )	0.56 ( 1.32 )	0.58 ( 0.25 )	-0.79 ( -2.11 )
Catheter Site Infection	4	5.24 ( 1.71 - 16.07 )	5.24 ( 10.49 )	4.24 ( 1.66 )	2.08 ( 0.63 )
Roseolovirus Test Positive	4	8.51 ( 2.56 - 28.28 )	8.51 ( 17.67 )	6.01 ( 2.2 )	2.59 ( 1.07 )
Portal Hypertension	4	2.72 ( 0.95 - 7.83 )	2.72 ( 3.76 )	2.49 ( 1.03 )	1.31 ( -0.08 )
Splenomegaly	4	0.81 ( 0.3 - 2.21 )	0.81 ( 0.17 )	0.82 ( 0.35 )	-0.29 ( -1.61 )
Skin Necrosis	4	1.95 ( 0.69 - 5.48 )	1.95 ( 1.65 )	1.85 ( 0.78 )	0.89 ( -0.48 )
Escherichia Urinary Tract Infection	4	1.02 ( 0.37 - 2.79 )	1.02 ( 0 )	1.02 ( 0.44 )	0.02 ( -1.31 )
Hypoproteinaemia	4	3.1 ( 1.07 - 8.98 )	3.09 ( 4.8 )	2.77 ( 1.14 )	1.47 ( 0.07 )
Hyperkalaemia	4	0.34 ( 0.13 - 0.92 )	0.34 ( 4.92 )	0.36 ( 0.16 )	-1.49 ( -2.79 )
Cortisol Decreased	4	13.62 ( 3.66 - 50.73 )	13.62 ( 25.98 )	8.01 ( 2.67 )	3 ( 1.42 )
Citrobacter Bacteraemia	4	11.35 ( 3.2 - 40.23 )	11.35 ( 22.64 )	7.21 ( 2.5 )	2.85 ( 1.29 )
Abdominal Distension	4	0.67 ( 0.25 - 1.83 )	0.67 ( 0.61 )	0.69 ( 0.3 )	-0.54 ( -1.86 )
Scedosporium Infection	4	1.24 ( 0.45 - 3.42 )	1.24 ( 0.17 )	1.22 ( 0.52 )	0.29 ( -1.05 )
Glomerulonephritis Membranous	4	1.58 ( 0.57 - 4.41 )	1.58 ( 0.79 )	1.53 ( 0.65 )	0.62 ( -0.74 )
Pulmonary Embolism	4	0.38 ( 0.14 - 1.02 )	0.38 ( 3.95 )	0.39 ( 0.17 )	-1.34 ( -2.65 )
Toxic Epidermal Necrolysis	4	0.77 ( 0.28 - 2.11 )	0.77 ( 0.25 )	0.78 ( 0.34 )	-0.35 ( -1.68 )
Drug-Induced Liver Injury	4	0.97 ( 0.35 - 2.66 )	0.97 ( 0 )	0.97 ( 0.42 )	-0.04 ( -1.37 )
Fungal Sepsis	4	2.13 ( 0.75 - 6.02 )	2.13 ( 2.12 )	2 ( 0.84 )	1 ( -0.37 )
Cardiac Failure Congestive	4	0.54 ( 0.2 - 1.45 )	0.54 ( 1.56 )	0.55 ( 0.24 )	-0.86 ( -2.18 )
Viraemia	4	0.41 ( 0.15 - 1.1 )	0.41 ( 3.37 )	0.42 ( 0.18 )	-1.25 ( -2.56 )
Meningitis Enterococcal	4	9.73 ( 2.85 - 33.24 )	9.73 ( 19.93 )	6.55 ( 2.34 )	2.71 ( 1.18 )
Vascular Device Infection	4	3.1 ( 1.07 - 8.98 )	3.09 ( 4.8 )	2.77 ( 1.14 )	1.47 ( 0.07 )
Cervical Dysplasia	4	6.81 ( 2.14 - 21.72 )	6.81 ( 14.16 )	5.15 ( 1.95 )	2.36 ( 0.87 )
Meningitis Cryptococcal	4	1.7 ( 0.61 - 4.76 )	1.7 ( 1.05 )	1.64 ( 0.69 )	0.71 ( -0.65 )
Polyserositis	4	17.03 ( 4.26 - 68.09 )	17.02 ( 30.16 )	9.01 ( 2.83 )	3.17 ( 1.56 )
Non-Cirrhotic Portal Hypertension	4	22.7 ( 5.08 - 101.45 )	22.69 ( 35.55 )	10.3 ( 2.94 )	3.36 ( 1.72 )
Acute Graft Versus Host Disease In Liver	4	0.25 ( 0.09 - 0.68 )	0.25 ( 8.65 )	0.26 ( 0.12 )	-1.92 ( -3.22 )
Demyelination	4	2.43 ( 0.85 - 6.94 )	2.43 ( 2.95 )	2.25 ( 0.94 )	1.17 ( -0.21 )
Pleural Thickening	4	11.35 ( 3.2 - 40.23 )	11.35 ( 22.64 )	7.21 ( 2.5 )	2.85 ( 1.29 )
Meningitis Viral	4	2.27 ( 0.8 - 6.44 )	2.27 ( 2.51 )	2.12 ( 0.89 )	1.08 ( -0.3 )
Focal Segmental Glomerulosclerosis	4	0.81 ( 0.3 - 2.21 )	0.81 ( 0.17 )	0.82 ( 0.35 )	-0.29 ( -1.61 )
Pneumococcal Sepsis	4	3.24 ( 1.11 - 9.45 )	3.24 ( 5.21 )	2.88 ( 1.18 )	1.53 ( 0.12 )
Lymph Node Tuberculosis	4	7.57 ( 2.33 - 24.58 )	7.56 ( 15.78 )	5.54 ( 2.07 )	2.47 ( 0.97 )
Nocardiosis	4	0.52 ( 0.19 - 1.41 )	0.52 ( 1.72 )	0.53 ( 0.23 )	-0.91 ( -2.22 )
Gastrointestinal Mucosal Disorder	4	8.51 ( 2.56 - 28.28 )	8.51 ( 17.67 )	6.01 ( 2.2 )	2.59 ( 1.07 )
Haemolytic Anaemia	4	0.66 ( 0.24 - 1.79 )	0.66 ( 0.67 )	0.67 ( 0.29 )	-0.57 ( -1.89 )
Diabetes Insipidus	4	4.26 ( 1.42 - 12.73 )	4.25 ( 7.97 )	3.6 ( 1.44 )	1.85 ( 0.41 )
Haematochezia	4	1.15 ( 0.42 - 3.18 )	1.15 ( 0.08 )	1.14 ( 0.49 )	0.19 ( -1.15 )
Rhinorrhoea	4	1.7 ( 0.61 - 4.76 )	1.7 ( 1.05 )	1.64 ( 0.69 )	0.71 ( -0.65 )
Lymphoproliferative Disorder	4	0.64 ( 0.24 - 1.74 )	0.64 ( 0.77 )	0.66 ( 0.28 )	-0.61 ( -1.93 )
Deep Vein Thrombosis	4	0.46 ( 0.17 - 1.23 )	0.46 ( 2.52 )	0.47 ( 0.21 )	-1.09 ( -2.4 )
Diplopia	4	1.08 ( 0.39 - 2.97 )	1.08 ( 0.02 )	1.08 ( 0.46 )	0.11 ( -1.23 )
Proteinuria	4	0.37 ( 0.14 - 1 )	0.37 ( 4.2 )	0.38 ( 0.17 )	-1.38 ( -2.69 )
Autoimmune Pancytopenia	4	13.62 ( 3.66 - 50.73 )	13.62 ( 25.98 )	8.01 ( 2.67 )	3 ( 1.42 )
Intracranial Pressure Increased	4	1.51 ( 0.54 - 4.21 )	1.51 ( 0.64 )	1.47 ( 0.63 )	0.56 ( -0.8 )
Organ Failure	4	1.66 ( 0.59 - 4.64 )	1.66 ( 0.96 )	1.6 ( 0.68 )	0.68 ( -0.68 )
Pneumatosis Intestinalis	4	0.69 ( 0.26 - 1.89 )	0.69 ( 0.52 )	0.71 ( 0.31 )	-0.5 ( -1.82 )
Cardiopulmonary Failure	4	2.84 ( 0.98 - 8.18 )	2.84 ( 4.08 )	2.57 ( 1.06 )	1.36 ( -0.03 )
Covid-19 Pneumonia	4	0.36 ( 0.13 - 0.97 )	0.36 ( 4.46 )	0.37 ( 0.16 )	-1.42 ( -2.73 )
Cardiomegaly	4	0.87 ( 0.32 - 2.38 )	0.87 ( 0.07 )	0.88 ( 0.38 )	-0.19 ( -1.51 )
C-Reactive Protein Increased	4	0.32 ( 0.12 - 0.86 )	0.32 ( 5.64 )	0.33 ( 0.15 )	-1.58 ( -2.89 )
Enterocolitis Viral	4	3.78 ( 1.28 - 11.18 )	3.78 ( 6.7 )	3.28 ( 1.32 )	1.71 ( 0.29 )
Hyperplasia	4	9.73 ( 2.85 - 33.24 )	9.73 ( 19.93 )	6.55 ( 2.34 )	2.71 ( 1.18 )
Duodenal Ulcer	4	2.52 ( 0.88 - 7.21 )	2.52 ( 3.2 )	2.33 ( 0.97 )	1.22 ( -0.17 )
Immune Reconstitution Inflammatory Syndrome	4	1.12 ( 0.41 - 3.07 )	1.12 ( 0.05 )	1.11 ( 0.48 )	0.15 ( -1.19 )
Feeding Disorder	4	6.81 ( 2.14 - 21.72 )	6.81 ( 14.16 )	5.15 ( 1.95 )	2.36 ( 0.87 )
Norovirus Infection	4	1.55 ( 0.56 - 4.31 )	1.55 ( 0.71 )	1.5 ( 0.64 )	0.59 ( -0.77 )
Paraesthesia	4	0.82 ( 0.3 - 2.24 )	0.82 ( 0.15 )	0.83 ( 0.36 )	-0.27 ( -1.6 )
Haemoptysis	4	0.73 ( 0.27 - 1.99 )	0.73 ( 0.38 )	0.74 ( 0.32 )	-0.43 ( -1.75 )
Gait Disturbance	4	0.69 ( 0.26 - 1.89 )	0.69 ( 0.52 )	0.71 ( 0.31 )	-0.5 ( -1.82 )
Hepatitis Acute	4	1.66 ( 0.59 - 4.64 )	1.66 ( 0.96 )	1.6 ( 0.68 )	0.68 ( -0.68 )
Metapneumovirus Infection	4	1.75 ( 0.62 - 4.89 )	1.75 ( 1.16 )	1.68 ( 0.71 )	0.75 ( -0.62 )
Serratia Infection	4	2.27 ( 0.8 - 6.44 )	2.27 ( 2.51 )	2.12 ( 0.89 )	1.08 ( -0.3 )
Coma	4	0.54 ( 0.2 - 1.45 )	0.54 ( 1.56 )	0.55 ( 0.24 )	-0.86 ( -2.18 )
Acidosis	4	0.97 ( 0.35 - 2.66 )	0.97 ( 0 )	0.97 ( 0.42 )	-0.04 ( -1.37 )
Granuloma	4	2.13 ( 0.75 - 6.02 )	2.13 ( 2.12 )	2 ( 0.84 )	1 ( -0.37 )
Neuropsychiatric Syndrome	4	68.11 ( 7.61 - 609.44 )	68.08 ( 52.88 )	14.42 ( 2.3 )	3.85 ( 2.1 )
Skin Exfoliation	3	0.88 ( 0.28 - 2.81 )	0.88 ( 0.05 )	0.89 ( 0.34 )	-0.17 ( -1.66 )
Cardiac Disorder	3	1.16 ( 0.36 - 3.74 )	1.16 ( 0.06 )	1.15 ( 0.43 )	0.2 ( -1.3 )
Drug Clearance Decreased	3	7.3 ( 1.89 - 28.22 )	7.29 ( 11.41 )	5.41 ( 1.74 )	2.43 ( 0.75 )
Obstructive Airways Disorder	3	1.96 ( 0.59 - 6.49 )	1.96 ( 1.27 )	1.86 ( 0.69 )	0.9 ( -0.64 )
Brain Death	3	2.84 ( 0.84 - 9.63 )	2.84 ( 3.06 )	2.57 ( 0.93 )	1.36 ( -0.2 )
Respiratory Arrest	3	1.25 ( 0.39 - 4.02 )	1.25 ( 0.14 )	1.23 ( 0.46 )	0.3 ( -1.21 )
Aspiration	3	1.82 ( 0.55 - 6 )	1.82 ( 1.01 )	1.74 ( 0.64 )	0.8 ( -0.73 )
Thrombosis	3	0.52 ( 0.16 - 1.63 )	0.52 ( 1.32 )	0.53 ( 0.2 )	-0.92 ( -2.39 )
Sepsis Syndrome	3	10.21 ( 2.44 - 42.75 )	10.21 ( 15.58 )	6.76 ( 2.04 )	2.76 ( 1.02 )
Myocardial Infarction	3	0.43 ( 0.14 - 1.35 )	0.43 ( 2.22 )	0.44 ( 0.17 )	-1.17 ( -2.64 )
Appendicitis	3	1.38 ( 0.43 - 4.48 )	1.38 ( 0.29 )	1.35 ( 0.5 )	0.43 ( -1.08 )
Acute Lymphocytic Leukaemia Recurrent	3	0.47 ( 0.15 - 1.47 )	0.47 ( 1.76 )	0.48 ( 0.18 )	-1.05 ( -2.52 )
Subdural Haematoma	3	1.65 ( 0.5 - 5.39 )	1.65 ( 0.7 )	1.59 ( 0.59 )	0.67 ( -0.85 )
Hypersensitivity	3	0.56 ( 0.18 - 1.77 )	0.56 ( 1 )	0.58 ( 0.22 )	-0.8 ( -2.27 )
Gastroenteritis Rotavirus	3	1.7 ( 0.52 - 5.58 )	1.7 ( 0.79 )	1.64 ( 0.61 )	0.71 ( -0.81 )
Hyperthyroidism	3	2.13 ( 0.64 - 7.07 )	2.13 ( 1.59 )	2 ( 0.73 )	1 ( -0.54 )
Hypertransaminasaemia	3	1 ( 0.31 - 3.21 )	1 ( 0 )	1 ( 0.38 )	0 ( -1.49 )
Hypogonadism	3	3 ( 0.88 - 10.25 )	3 ( 3.41 )	2.7 ( 0.97 )	1.43 ( -0.14 )
Diffuse Large B-Cell Lymphoma	3	0.29 ( 0.09 - 0.9 )	0.29 ( 5.24 )	0.3 ( 0.11 )	-1.74 ( -3.2 )
Adenocarcinoma Of Colon	3	4.64 ( 1.3 - 16.65 )	4.64 ( 6.74 )	3.86 ( 1.33 )	1.95 ( 0.33 )
Mouth Haemorrhage	3	3.19 ( 0.93 - 10.96 )	3.19 ( 3.8 )	2.85 ( 1.01 )	1.51 ( -0.07 )
Aspartate Aminotransferase Increased	3	0.17 ( 0.05 - 0.53 )	0.17 ( 11.98 )	0.18 ( 0.07 )	-2.48 ( -3.93 )
Wernicke'S Encephalopathy	3	3.65 ( 1.05 - 12.7 )	3.65 ( 4.75 )	3.18 ( 1.12 )	1.67 ( 0.07 )
Hepatitis B Reactivation	3	1.38 ( 0.43 - 4.48 )	1.38 ( 0.29 )	1.35 ( 0.5 )	0.43 ( -1.08 )
Lung Adenocarcinoma	3	2.32 ( 0.69 - 7.76 )	2.32 ( 1.98 )	2.16 ( 0.79 )	1.11 ( -0.44 )
Coombs Positive Haemolytic Anaemia	3	5.67 ( 1.54 - 20.97 )	5.67 ( 8.66 )	4.5 ( 1.51 )	2.17 ( 0.52 )
Neuropathy Peripheral	3	0.28 ( 0.09 - 0.86 )	0.28 ( 5.61 )	0.29 ( 0.11 )	-1.8 ( -3.26 )
Herpes Zoster Meningoencephalitis	3	2.13 ( 0.64 - 7.07 )	2.13 ( 1.59 )	2 ( 0.73 )	1 ( -0.54 )
Anal Abscess	3	2.69 ( 0.8 - 9.08 )	2.69 ( 2.75 )	2.46 ( 0.89 )	1.3 ( -0.27 )
Treatment Failure	3	0.38 ( 0.12 - 1.21 )	0.38 ( 2.9 )	0.4 ( 0.15 )	-1.33 ( -2.79 )
Dermatitis Exfoliative Generalised	3	3.65 ( 1.05 - 12.7 )	3.65 ( 4.75 )	3.18 ( 1.12 )	1.67 ( 0.07 )
Left Ventricular Dysfunction	3	0.9 ( 0.28 - 2.86 )	0.9 ( 0.03 )	0.9 ( 0.34 )	-0.15 ( -1.64 )
Papilloma Viral Infection	3	2.43 ( 0.73 - 8.15 )	2.43 ( 2.21 )	2.25 ( 0.82 )	1.17 ( -0.38 )
Pharyngitis	3	1.7 ( 0.52 - 5.58 )	1.7 ( 0.79 )	1.64 ( 0.61 )	0.71 ( -0.81 )
Enterobacter Infection	3	0.75 ( 0.24 - 2.39 )	0.75 ( 0.24 )	0.76 ( 0.29 )	-0.39 ( -1.88 )
Myocarditis	3	0.91 ( 0.29 - 2.91 )	0.91 ( 0.02 )	0.92 ( 0.35 )	-0.13 ( -1.62 )
Haemoglobin Decreased	3	0.16 ( 0.05 - 0.51 )	0.16 ( 12.84 )	0.17 ( 0.07 )	-2.55 ( -4 )
Alternaria Infection	3	3.4 ( 0.99 - 11.76 )	3.4 ( 4.24 )	3 ( 1.06 )	1.59 ( 0 )
Upper Respiratory Fungal Infection	3	5.11 ( 1.41 - 18.56 )	5.11 ( 7.62 )	4.16 ( 1.41 )	2.06 ( 0.42 )
Pathogen Resistance	3	0.45 ( 0.14 - 1.42 )	0.45 ( 1.94 )	0.47 ( 0.18 )	-1.1 ( -2.57 )
Herpes Zoster Infection Neurological	3	17.02 ( 3.44 - 84.36 )	17.02 ( 22.62 )	9.01 ( 2.36 )	3.17 ( 1.36 )
Extramedullary Haemopoiesis	3	12.77 ( 2.86 - 57.06 )	12.76 ( 18.59 )	7.72 ( 2.21 )	2.95 ( 1.18 )
Thyroid Cancer	3	1.96 ( 0.59 - 6.49 )	1.96 ( 1.27 )	1.86 ( 0.69 )	0.9 ( -0.64 )
Pulmonary Sepsis	3	3 ( 0.88 - 10.25 )	3 ( 3.41 )	2.7 ( 0.97 )	1.43 ( -0.14 )
Squamous Cell Carcinoma Of The Oral Cavity	3	5.67 ( 1.54 - 20.97 )	5.67 ( 8.66 )	4.5 ( 1.51 )	2.17 ( 0.52 )
Ejection Fraction Decreased	3	0.88 ( 0.28 - 2.81 )	0.88 ( 0.05 )	0.89 ( 0.34 )	-0.17 ( -1.66 )
Neutrophil Count Abnormal	3	17.02 ( 3.44 - 84.36 )	17.02 ( 22.62 )	9.01 ( 2.36 )	3.17 ( 1.36 )
Palpitations	3	1.25 ( 0.39 - 4.02 )	1.25 ( 0.14 )	1.23 ( 0.46 )	0.3 ( -1.21 )
Autoimmune Hepatitis	3	2.84 ( 0.84 - 9.63 )	2.84 ( 3.06 )	2.57 ( 0.93 )	1.36 ( -0.2 )
Nervous System Disorder	3	0.44 ( 0.14 - 1.38 )	0.44 ( 2.08 )	0.45 ( 0.17 )	-1.14 ( -2.61 )
Hepatorenal Syndrome	3	4.26 ( 1.2 - 15.08 )	4.25 ( 5.98 )	3.6 ( 1.25 )	1.85 ( 0.24 )
Deafness	3	1.96 ( 0.59 - 6.49 )	1.96 ( 1.27 )	1.86 ( 0.69 )	0.9 ( -0.64 )
Impaired Quality Of Life	3	8.51 ( 2.13 - 34.04 )	8.51 ( 13.26 )	6.01 ( 1.88 )	2.59 ( 0.88 )
Pneumonia Influenzal	3	2.13 ( 0.64 - 7.07 )	2.13 ( 1.59 )	2 ( 0.73 )	1 ( -0.54 )
Brain Herniation	3	1.31 ( 0.4 - 4.24 )	1.31 ( 0.2 )	1.29 ( 0.48 )	0.36 ( -1.14 )
Blood Pressure Decreased	3	0.46 ( 0.14 - 1.43 )	0.46 ( 1.9 )	0.47 ( 0.18 )	-1.09 ( -2.56 )
Vitiligo	3	4.64 ( 1.3 - 16.65 )	4.64 ( 6.74 )	3.86 ( 1.33 )	1.95 ( 0.33 )
Gastroenteritis Norovirus	3	0.79 ( 0.25 - 2.5 )	0.79 ( 0.17 )	0.79 ( 0.3 )	-0.33 ( -1.82 )
Neurological Decompensation	3	1.76 ( 0.54 - 5.78 )	1.76 ( 0.89 )	1.69 ( 0.62 )	0.76 ( -0.77 )
Enterocolitis	3	1.02 ( 0.32 - 3.27 )	1.02 ( 0 )	1.02 ( 0.38 )	0.03 ( -1.47 )
Intestinal Obstruction	3	1.02 ( 0.32 - 3.27 )	1.02 ( 0 )	1.02 ( 0.38 )	0.03 ( -1.47 )
Restrictive Pulmonary Disease	3	5.67 ( 1.54 - 20.97 )	5.67 ( 8.66 )	4.5 ( 1.51 )	2.17 ( 0.52 )
Dysuria	3	0.68 ( 0.21 - 2.16 )	0.68 ( 0.43 )	0.69 ( 0.26 )	-0.53 ( -2.01 )
Anuria	3	0.53 ( 0.17 - 1.66 )	0.53 ( 1.24 )	0.54 ( 0.21 )	-0.89 ( -2.36 )
Pyelonephritis	3	0.43 ( 0.14 - 1.36 )	0.43 ( 2.18 )	0.45 ( 0.17 )	-1.16 ( -2.63 )
Therapeutic Response Unexpected	3	12.77 ( 2.86 - 57.06 )	12.76 ( 18.59 )	7.72 ( 2.21 )	2.95 ( 1.18 )
Pancreatitis Acute	3	0.44 ( 0.14 - 1.38 )	0.44 ( 2.08 )	0.45 ( 0.17 )	-1.14 ( -2.61 )
Herpes Simplex Viraemia	3	10.21 ( 2.44 - 42.75 )	10.21 ( 15.58 )	6.76 ( 2.04 )	2.76 ( 1.02 )
Atypical Mycobacterial Infection	3	1.76 ( 0.54 - 5.78 )	1.76 ( 0.89 )	1.69 ( 0.62 )	0.76 ( -0.77 )
Polymyositis	3	8.51 ( 2.13 - 34.04 )	8.51 ( 13.26 )	6.01 ( 1.88 )	2.59 ( 0.88 )
Irritability	3	2.84 ( 0.84 - 9.63 )	2.84 ( 3.06 )	2.57 ( 0.93 )	1.36 ( -0.2 )
Disseminated Toxoplasmosis	3	2.13 ( 0.64 - 7.07 )	2.13 ( 1.59 )	2 ( 0.73 )	1 ( -0.54 )
T-Cell Prolymphocytic Leukaemia	3	8.51 ( 2.13 - 34.04 )	8.51 ( 13.26 )	6.01 ( 1.88 )	2.59 ( 0.88 )
Compression Fracture	3	8.51 ( 2.13 - 34.04 )	8.51 ( 13.26 )	6.01 ( 1.88 )	2.59 ( 0.88 )
Epstein Barr Virus Positive Mucocutaneous Ulcer	3	7.3 ( 1.89 - 28.22 )	7.29 ( 11.41 )	5.41 ( 1.74 )	2.43 ( 0.75 )
Hypothermia	3	2.84 ( 0.84 - 9.63 )	2.84 ( 3.06 )	2.57 ( 0.93 )	1.36 ( -0.2 )
Apnoea	3	4.26 ( 1.2 - 15.08 )	4.25 ( 5.98 )	3.6 ( 1.25 )	1.85 ( 0.24 )
Renal Tubular Necrosis	3	0.27 ( 0.08 - 0.83 )	0.27 ( 5.99 )	0.28 ( 0.11 )	-1.85 ( -3.31 )
Toxic Encephalopathy	3	0.7 ( 0.22 - 2.22 )	0.7 ( 0.37 )	0.71 ( 0.27 )	-0.49 ( -1.97 )
Urinary Tract Obstruction	3	3.4 ( 0.99 - 11.76 )	3.4 ( 4.24 )	3 ( 1.06 )	1.59 ( 0 )
Serositis	3	5.11 ( 1.41 - 18.56 )	5.11 ( 7.62 )	4.16 ( 1.41 )	2.06 ( 0.42 )
Disorientation	3	0.44 ( 0.14 - 1.4 )	0.44 ( 2.04 )	0.46 ( 0.18 )	-1.13 ( -2.59 )
Lymphoma	3	0.88 ( 0.28 - 2.81 )	0.88 ( 0.05 )	0.89 ( 0.34 )	-0.17 ( -1.66 )
Bladder Tamponade	3	10.21 ( 2.44 - 42.75 )	10.21 ( 15.58 )	6.76 ( 2.04 )	2.76 ( 1.02 )
Cytomegalovirus Colitis	3	0.35 ( 0.11 - 1.09 )	0.35 ( 3.61 )	0.36 ( 0.14 )	-1.47 ( -2.93 )
Meningitis Aseptic	3	2.22 ( 0.67 - 7.4 )	2.22 ( 1.78 )	2.08 ( 0.76 )	1.06 ( -0.49 )
Ovarian Disorder	3	5.67 ( 1.54 - 20.97 )	5.67 ( 8.66 )	4.5 ( 1.51 )	2.17 ( 0.52 )
Actinomycotic Sepsis	3	51.08 ( 5.31 - 491.08 )	51.06 ( 36.81 )	13.51 ( 2.03 )	3.76 ( 1.82 )
Cellulitis Staphylococcal	3	4.64 ( 1.3 - 16.65 )	4.64 ( 6.74 )	3.86 ( 1.33 )	1.95 ( 0.33 )
Focal Nodular Hyperplasia	3	5.11 ( 1.41 - 18.56 )	5.11 ( 7.62 )	4.16 ( 1.41 )	2.06 ( 0.42 )
Cushingoid	3	2.22 ( 0.67 - 7.4 )	2.22 ( 1.78 )	2.08 ( 0.76 )	1.06 ( -0.49 )
Skin Hypopigmentation	3	5.11 ( 1.41 - 18.56 )	5.11 ( 7.62 )	4.16 ( 1.41 )	2.06 ( 0.42 )
Autism Spectrum Disorder	3	Inf ( NaN - Inf )	Inf ( 51.06 )	18.02 ( 0 )	4.17 ( 2.13 )
Autoimmune Disorder	3	2.32 ( 0.69 - 7.76 )	2.32 ( 1.98 )	2.16 ( 0.79 )	1.11 ( -0.44 )
Chronic Graft Versus Host Disease In Liver	3	0.5 ( 0.16 - 1.56 )	0.5 ( 1.5 )	0.51 ( 0.2 )	-0.97 ( -2.44 )
Angioimmunoblastic T-Cell Lymphoma	3	8.51 ( 2.13 - 34.04 )	8.51 ( 13.26 )	6.01 ( 1.88 )	2.59 ( 0.88 )
Mucosal Erosion	3	4.64 ( 1.3 - 16.65 )	4.64 ( 6.74 )	3.86 ( 1.33 )	1.95 ( 0.33 )
Mucocutaneous Ulceration	3	51.08 ( 5.31 - 491.08 )	51.06 ( 36.81 )	13.51 ( 2.03 )	3.76 ( 1.82 )
Jejunal Ulcer	3	25.54 ( 4.27 - 152.86 )	25.53 ( 28.28 )	10.81 ( 2.42 )	3.43 ( 1.57 )
Apoptosis	3	6.38 ( 1.69 - 24.07 )	6.38 ( 9.9 )	4.91 ( 1.62 )	2.3 ( 0.63 )
Immune Effector Cell-Associated Neurotoxicity Syndrome	3	0.39 ( 0.12 - 1.23 )	0.39 ( 2.76 )	0.41 ( 0.16 )	-1.3 ( -2.76 )
Ileus	3	0.68 ( 0.21 - 2.16 )	0.68 ( 0.43 )	0.69 ( 0.26 )	-0.53 ( -2.01 )
Visual Field Defect	3	2.13 ( 0.64 - 7.07 )	2.13 ( 1.59 )	2 ( 0.73 )	1 ( -0.54 )
Vertigo	3	1 ( 0.31 - 3.21 )	1 ( 0 )	1 ( 0.38 )	0 ( -1.49 )
Respiratory Tract Ulceration	3	51.08 ( 5.31 - 491.08 )	51.06 ( 36.81 )	13.51 ( 2.03 )	3.76 ( 1.82 )
Bk Polyomavirus Test Positive	3	1.96 ( 0.59 - 6.49 )	1.96 ( 1.27 )	1.86 ( 0.69 )	0.9 ( -0.64 )
Therapy Partial Responder	3	0.57 ( 0.18 - 1.81 )	0.57 ( 0.92 )	0.59 ( 0.22 )	-0.77 ( -2.24 )
Subdural Haemorrhage	3	5.67 ( 1.54 - 20.97 )	5.67 ( 8.66 )	4.5 ( 1.51 )	2.17 ( 0.52 )
Delayed Engraftment	3	1.6 ( 0.49 - 5.21 )	1.6 ( 0.61 )	1.54 ( 0.57 )	0.63 ( -0.89 )
Red Blood Cell Transfusion	3	8.51 ( 2.13 - 34.04 )	8.51 ( 13.26 )	6.01 ( 1.88 )	2.59 ( 0.88 )
Pancreatic Atrophy	3	10.21 ( 2.44 - 42.75 )	10.21 ( 15.58 )	6.76 ( 2.04 )	2.76 ( 1.02 )
Streptococcal Sepsis	3	1.55 ( 0.47 - 5.05 )	1.55 ( 0.53 )	1.5 ( 0.56 )	0.59 ( -0.93 )
Cytokine Storm	3	2.32 ( 0.69 - 7.76 )	2.32 ( 1.98 )	2.16 ( 0.79 )	1.11 ( -0.44 )
Depressed Level Of Consciousness	3	0.4 ( 0.13 - 1.24 )	0.4 ( 2.71 )	0.41 ( 0.16 )	-1.29 ( -2.75 )
Mental Disorder	3	1.7 ( 0.52 - 5.58 )	1.7 ( 0.79 )	1.64 ( 0.61 )	0.71 ( -0.81 )
Sinus Tachycardia	3	1.46 ( 0.45 - 4.74 )	1.46 ( 0.4 )	1.42 ( 0.53 )	0.51 ( -1.01 )
Gastric Haemorrhage	3	4.64 ( 1.3 - 16.65 )	4.64 ( 6.74 )	3.86 ( 1.33 )	1.95 ( 0.33 )
Retinitis Viral	3	3.4 ( 0.99 - 11.76 )	3.4 ( 4.24 )	3 ( 1.06 )	1.59 ( 0 )
Sertoli-Cell-Only Syndrome	3	5.67 ( 1.54 - 20.97 )	5.67 ( 8.66 )	4.5 ( 1.51 )	2.17 ( 0.52 )
Product Used For Unknown Indication	3	51.08 ( 5.31 - 491.08 )	51.06 ( 36.81 )	13.51 ( 2.03 )	3.76 ( 1.82 )
Loss Of Consciousness	3	0.46 ( 0.15 - 1.45 )	0.46 ( 1.85 )	0.47 ( 0.18 )	-1.08 ( -2.54 )
Haemodialysis	3	0.52 ( 0.16 - 1.63 )	0.52 ( 1.32 )	0.53 ( 0.2 )	-0.92 ( -2.39 )
Blister	2	0.85 ( 0.21 - 3.52 )	0.85 ( 0.05 )	0.86 ( 0.26 )	-0.22 ( -1.94 )
Wound	2	3.4 ( 0.75 - 15.54 )	3.4 ( 2.83 )	3 ( 0.84 )	1.59 ( -0.26 )
Pneumonia Adenoviral	2	1.36 ( 0.32 - 5.75 )	1.36 ( 0.18 )	1.33 ( 0.4 )	0.42 ( -1.34 )
Oesophagitis	2	0.59 ( 0.14 - 2.4 )	0.59 ( 0.56 )	0.6 ( 0.18 )	-0.74 ( -2.44 )
Graft Loss	2	0.35 ( 0.09 - 1.42 )	0.35 ( 2.35 )	0.36 ( 0.11 )	-1.46 ( -3.15 )
Systemic Inflammatory Response Syndrome	2	0.65 ( 0.16 - 2.69 )	0.65 ( 0.35 )	0.67 ( 0.2 )	-0.58 ( -2.29 )
Gastrointestinal Inflammation	2	0.69 ( 0.17 - 2.86 )	0.69 ( 0.26 )	0.71 ( 0.22 )	-0.5 ( -2.21 )
Haemorrhagic Disorder	2	6.81 ( 1.32 - 35.1 )	6.81 ( 7.08 )	5.15 ( 1.31 )	2.36 ( 0.41 )
Acinetobacter Infection	2	0.83 ( 0.2 - 3.43 )	0.83 ( 0.07 )	0.84 ( 0.26 )	-0.25 ( -1.98 )
Mental Status Changes	2	0.25 ( 0.06 - 1.02 )	0.25 ( 4.37 )	0.26 ( 0.08 )	-1.93 ( -3.61 )
Haemolysis	2	0.37 ( 0.09 - 1.52 )	0.37 ( 2.05 )	0.39 ( 0.12 )	-1.37 ( -3.06 )
Paralysis	2	1.7 ( 0.4 - 7.28 )	1.7 ( 0.53 )	1.64 ( 0.49 )	0.71 ( -1.06 )
Renal Disorder	2	0.22 ( 0.06 - 0.9 )	0.22 ( 5.31 )	0.23 ( 0.07 )	-2.1 ( -3.78 )
Hyperthermia	2	0.6 ( 0.15 - 2.45 )	0.6 ( 0.53 )	0.61 ( 0.19 )	-0.71 ( -2.42 )
Inflammatory Pseudotumour	2	17.02 ( 2.4 - 120.87 )	17.02 ( 15.08 )	9.01 ( 1.75 )	3.17 ( 1.06 )
Bone Lesion	2	2.27 ( 0.52 - 9.93 )	2.27 ( 1.25 )	2.12 ( 0.62 )	1.08 ( -0.72 )
Cataract	2	0.6 ( 0.15 - 2.45 )	0.6 ( 0.53 )	0.61 ( 0.19 )	-0.71 ( -2.42 )
Diabetes Mellitus	2	0.13 ( 0.03 - 0.51 )	0.13 ( 11.99 )	0.13 ( 0.04 )	-2.91 ( -4.59 )
Haemosiderosis	2	3.4 ( 0.75 - 15.54 )	3.4 ( 2.83 )	3 ( 0.84 )	1.59 ( -0.26 )
Subarachnoid Haemorrhage	2	0.81 ( 0.2 - 3.35 )	0.81 ( 0.08 )	0.82 ( 0.25 )	-0.29 ( -2.01 )
Presyncope	2	1 ( 0.24 - 4.17 )	1 ( 0 )	1 ( 0.3 )	0 ( -1.73 )
Osteoporosis	2	0.92 ( 0.22 - 3.82 )	0.92 ( 0.01 )	0.92 ( 0.28 )	-0.11 ( -1.84 )
Norovirus Test Positive	2	6.81 ( 1.32 - 35.1 )	6.81 ( 7.08 )	5.15 ( 1.31 )	2.36 ( 0.41 )
Malnutrition	2	0.56 ( 0.14 - 2.28 )	0.56 ( 0.68 )	0.57 ( 0.18 )	-0.81 ( -2.51 )
Rhabdomyolysis	2	0.31 ( 0.08 - 1.25 )	0.31 ( 3.03 )	0.32 ( 0.1 )	-1.64 ( -3.32 )
Dysphagia	2	0.24 ( 0.06 - 0.97 )	0.24 ( 4.76 )	0.25 ( 0.08 )	-2 ( -3.68 )
Tooth Malformation	2	8.51 ( 1.56 - 46.48 )	8.51 ( 8.84 )	6.01 ( 1.45 )	2.59 ( 0.6 )
Follicular Thyroid Cancer	2	34.05 ( 3.09 - 375.52 )	34.04 ( 21.38 )	12.01 ( 1.61 )	3.59 ( 1.38 )
Ileus Paralytic	2	1.31 ( 0.31 - 5.52 )	1.31 ( 0.14 )	1.29 ( 0.39 )	0.36 ( -1.39 )
Sinusitis Bacterial	2	2.62 ( 0.59 - 11.61 )	2.62 ( 1.73 )	2.4 ( 0.69 )	1.26 ( -0.55 )
Small Intestinal Obstruction	2	0.74 ( 0.18 - 3.05 )	0.74 ( 0.18 )	0.75 ( 0.23 )	-0.41 ( -2.13 )
Blindness	2	0.43 ( 0.11 - 1.75 )	0.43 ( 1.47 )	0.44 ( 0.14 )	-1.17 ( -2.86 )
Keratitis	2	2.62 ( 0.59 - 11.61 )	2.62 ( 1.73 )	2.4 ( 0.69 )	1.26 ( -0.55 )
Hallucination, Visual	2	0.9 ( 0.22 - 3.71 )	0.9 ( 0.02 )	0.9 ( 0.27 )	-0.15 ( -1.88 )
Hepatic Steatosis	2	0.52 ( 0.13 - 2.11 )	0.52 ( 0.88 )	0.53 ( 0.16 )	-0.92 ( -2.62 )
Oral Candidiasis	2	0.55 ( 0.13 - 2.24 )	0.55 ( 0.72 )	0.56 ( 0.17 )	-0.83 ( -2.53 )
Fluid Retention	2	0.47 ( 0.12 - 1.93 )	0.47 ( 1.14 )	0.49 ( 0.15 )	-1.04 ( -2.74 )
Neoplasm	2	1.03 ( 0.25 - 4.3 )	1.03 ( 0 )	1.03 ( 0.31 )	0.04 ( -1.69 )
Alopecia	2	0.13 ( 0.03 - 0.52 )	0.13 ( 11.64 )	0.14 ( 0.04 )	-2.88 ( -4.55 )
Pneumonia Mycoplasmal	2	2.43 ( 0.55 - 10.7 )	2.43 ( 1.47 )	2.25 ( 0.65 )	1.17 ( -0.64 )
Neoplasm Recurrence	2	0.67 ( 0.16 - 2.74 )	0.67 ( 0.32 )	0.68 ( 0.21 )	-0.56 ( -2.27 )
Renal Haemorrhage	2	3.78 ( 0.82 - 17.51 )	3.78 ( 3.35 )	3.28 ( 0.91 )	1.71 ( -0.15 )
Hepatic Vein Occlusion	2	1.13 ( 0.27 - 4.75 )	1.13 ( 0.03 )	1.13 ( 0.34 )	0.17 ( -1.57 )
Dedifferentiated Liposarcoma	2	5.67 ( 1.15 - 28.12 )	5.67 ( 5.77 )	4.5 ( 1.18 )	2.17 ( 0.25 )
Left Ventricular Failure	2	2.13 ( 0.49 - 9.26 )	2.13 ( 1.06 )	2 ( 0.59 )	1 ( -0.79 )
Klebsiella Test Positive	2	2.84 ( 0.63 - 12.68 )	2.84 ( 2.04 )	2.57 ( 0.74 )	1.36 ( -0.46 )
Actinic Keratosis	2	0.34 ( 0.08 - 1.38 )	0.34 ( 2.51 )	0.35 ( 0.11 )	-1.5 ( -3.19 )
Ureaplasma Infection	2	1.31 ( 0.31 - 5.52 )	1.31 ( 0.14 )	1.29 ( 0.39 )	0.36 ( -1.39 )
Long Qt Syndrome	2	3.78 ( 0.82 - 17.51 )	3.78 ( 3.35 )	3.28 ( 0.91 )	1.71 ( -0.15 )
Infertility Female	2	17.02 ( 2.4 - 120.87 )	17.02 ( 15.08 )	9.01 ( 1.75 )	3.17 ( 1.06 )
Ovarian Cyst	2	0.16 ( 0.04 - 0.65 )	0.16 ( 8.71 )	0.17 ( 0.05 )	-2.57 ( -4.25 )
Eccrine Squamous Syringometaplasia	2	8.51 ( 1.56 - 46.48 )	8.51 ( 8.84 )	6.01 ( 1.45 )	2.59 ( 0.6 )
Concomitant Disease Aggravated	2	3.09 ( 0.69 - 13.97 )	3.09 ( 2.4 )	2.77 ( 0.79 )	1.47 ( -0.36 )
Herpes Simplex Test Positive	2	5.67 ( 1.15 - 28.12 )	5.67 ( 5.77 )	4.5 ( 1.18 )	2.17 ( 0.25 )
Nodular Melanoma	2	8.51 ( 1.56 - 46.48 )	8.51 ( 8.84 )	6.01 ( 1.45 )	2.59 ( 0.6 )
Leukaemia	2	0.97 ( 0.23 - 4.04 )	0.97 ( 0 )	0.97 ( 0.3 )	-0.04 ( -1.77 )
Pneumonia Aspiration	2	0.54 ( 0.13 - 2.21 )	0.54 ( 0.76 )	0.55 ( 0.17 )	-0.85 ( -2.55 )
Adenosquamous Cell Lung Cancer	2	17.02 ( 2.4 - 120.87 )	17.02 ( 15.08 )	9.01 ( 1.75 )	3.17 ( 1.06 )
Brain Stem Syndrome	2	6.81 ( 1.32 - 35.1 )	6.81 ( 7.08 )	5.15 ( 1.31 )	2.36 ( 0.41 )
Generalised Tonic-Clonic Seizure	2	0.53 ( 0.13 - 2.17 )	0.53 ( 0.8 )	0.55 ( 0.17 )	-0.87 ( -2.58 )
Hyperammonaemic Encephalopathy	2	3.09 ( 0.69 - 13.97 )	3.09 ( 2.4 )	2.77 ( 0.79 )	1.47 ( -0.36 )
Hyperventilation	2	5.67 ( 1.15 - 28.12 )	5.67 ( 5.77 )	4.5 ( 1.18 )	2.17 ( 0.25 )
Respiratory Alkalosis	2	6.81 ( 1.32 - 35.1 )	6.81 ( 7.08 )	5.15 ( 1.31 )	2.36 ( 0.41 )
Unresponsive To Stimuli	2	1.1 ( 0.26 - 4.59 )	1.1 ( 0.02 )	1.09 ( 0.33 )	0.13 ( -1.61 )
Underdose	2	1.79 ( 0.42 - 7.69 )	1.79 ( 0.63 )	1.72 ( 0.51 )	0.78 ( -1 )
Porphyria Non-Acute	2	8.51 ( 1.56 - 46.48 )	8.51 ( 8.84 )	6.01 ( 1.45 )	2.59 ( 0.6 )
Paronychia	2	3.4 ( 0.75 - 15.54 )	3.4 ( 2.83 )	3 ( 0.84 )	1.59 ( -0.26 )
Hepatitis C	2	0.3 ( 0.08 - 1.23 )	0.3 ( 3.13 )	0.32 ( 0.1 )	-1.66 ( -3.35 )
Moraxella Infection	2	3.4 ( 0.75 - 15.54 )	3.4 ( 2.83 )	3 ( 0.84 )	1.59 ( -0.26 )
Renal Cell Carcinoma	2	0.69 ( 0.17 - 2.86 )	0.69 ( 0.26 )	0.71 ( 0.22 )	-0.5 ( -2.21 )
Product Deposit	2	34.05 ( 3.09 - 375.52 )	34.04 ( 21.38 )	12.01 ( 1.61 )	3.59 ( 1.38 )
Therapeutic Response Decreased	2	0.34 ( 0.08 - 1.38 )	0.34 ( 2.51 )	0.35 ( 0.11 )	-1.5 ( -3.19 )
Blood Gonadotrophin Increased	2	34.05 ( 3.09 - 375.52 )	34.04 ( 21.38 )	12.01 ( 1.61 )	3.59 ( 1.38 )
Bladder Dysfunction	2	4.86 ( 1.01 - 23.42 )	4.86 ( 4.77 )	4 ( 1.08 )	2 ( 0.1 )
Hepatic Atrophy	2	11.35 ( 1.9 - 67.93 )	11.35 ( 11.32 )	7.21 ( 1.61 )	2.85 ( 0.81 )
Latent Tuberculosis	2	11.35 ( 1.9 - 67.93 )	11.35 ( 11.32 )	7.21 ( 1.61 )	2.85 ( 0.81 )
Left Ventricular Dilatation	2	17.02 ( 2.4 - 120.87 )	17.02 ( 15.08 )	9.01 ( 1.75 )	3.17 ( 1.06 )
Oxygen Consumption Increased	2	4.26 ( 0.9 - 20.04 )	4.25 ( 3.98 )	3.6 ( 0.99 )	1.85 ( -0.03 )
Sarcoidosis	2	2.27 ( 0.52 - 9.93 )	2.27 ( 1.25 )	2.12 ( 0.62 )	1.08 ( -0.72 )
Systolic Dysfunction	2	17.02 ( 2.4 - 120.87 )	17.02 ( 15.08 )	9.01 ( 1.75 )	3.17 ( 1.06 )
Hyperferritinaemia	2	3.09 ( 0.69 - 13.97 )	3.09 ( 2.4 )	2.77 ( 0.79 )	1.47 ( -0.36 )
Drug Ineffective For Unapproved Indication	2	0.1 ( 0.03 - 0.42 )	0.1 ( 15.36 )	0.11 ( 0.03 )	-3.19 ( -4.86 )
Pseudomonal Bacteraemia	2	1.03 ( 0.25 - 4.3 )	1.03 ( 0 )	1.03 ( 0.31 )	0.04 ( -1.69 )
Sinusitis	2	0.33 ( 0.08 - 1.34 )	0.33 ( 2.66 )	0.34 ( 0.11 )	-1.54 ( -3.23 )
Endocarditis	2	0.63 ( 0.15 - 2.59 )	0.63 ( 0.42 )	0.64 ( 0.2 )	-0.64 ( -2.35 )
Soft Tissue Infection	2	0.92 ( 0.22 - 3.82 )	0.92 ( 0.01 )	0.92 ( 0.28 )	-0.11 ( -1.84 )
Venous Thrombosis	2	1.36 ( 0.32 - 5.75 )	1.36 ( 0.18 )	1.33 ( 0.4 )	0.42 ( -1.34 )
Sinusitis Fungal	2	2.13 ( 0.49 - 9.26 )	2.13 ( 1.06 )	2 ( 0.59 )	1 ( -0.79 )
Cryptosporidiosis Infection	2	0.97 ( 0.23 - 4.04 )	0.97 ( 0 )	0.97 ( 0.3 )	-0.04 ( -1.77 )
Fanconi Syndrome	2	2.43 ( 0.55 - 10.7 )	2.43 ( 1.47 )	2.25 ( 0.65 )	1.17 ( -0.64 )
Abortion Spontaneous	2	0.52 ( 0.13 - 2.11 )	0.52 ( 0.88 )	0.53 ( 0.16 )	-0.92 ( -2.62 )
Maternal Exposure Before Pregnancy	2	4.26 ( 0.9 - 20.04 )	4.25 ( 3.98 )	3.6 ( 0.99 )	1.85 ( -0.03 )
Autoimmune Enteropathy	2	34.05 ( 3.09 - 375.52 )	34.04 ( 21.38 )	12.01 ( 1.61 )	3.59 ( 1.38 )
Glomerulonephritis	2	0.83 ( 0.2 - 3.43 )	0.83 ( 0.07 )	0.84 ( 0.26 )	-0.25 ( -1.98 )
Cytomegalovirus Enterocolitis	2	0.67 ( 0.16 - 2.74 )	0.67 ( 0.32 )	0.68 ( 0.21 )	-0.56 ( -2.27 )
Lower Respiratory Tract Infection Fungal	2	4.86 ( 1.01 - 23.42 )	4.86 ( 4.77 )	4 ( 1.08 )	2 ( 0.1 )
Urinary Tract Infection Bacterial	2	0.62 ( 0.15 - 2.54 )	0.62 ( 0.45 )	0.63 ( 0.19 )	-0.66 ( -2.37 )
Retinal Haemorrhage	2	0.69 ( 0.17 - 2.86 )	0.69 ( 0.26 )	0.71 ( 0.22 )	-0.5 ( -2.21 )
Microangiopathy	2	0.65 ( 0.16 - 2.69 )	0.65 ( 0.35 )	0.67 ( 0.2 )	-0.58 ( -2.29 )
Periorbital Oedema	2	3.78 ( 0.82 - 17.51 )	3.78 ( 3.35 )	3.28 ( 0.91 )	1.71 ( -0.15 )
Streptococcal Infection	2	0.85 ( 0.21 - 3.52 )	0.85 ( 0.05 )	0.86 ( 0.26 )	-0.22 ( -1.94 )
Blood Urea Increased	2	0.23 ( 0.06 - 0.93 )	0.23 ( 5.04 )	0.24 ( 0.08 )	-2.05 ( -3.73 )
Hypovolaemic Shock	2	1.55 ( 0.36 - 6.58 )	1.55 ( 0.35 )	1.5 ( 0.45 )	0.59 ( -1.18 )
Acute Polyneuropathy	2	11.35 ( 1.9 - 67.93 )	11.35 ( 11.32 )	7.21 ( 1.61 )	2.85 ( 0.81 )
Myoclonus	2	0.65 ( 0.16 - 2.69 )	0.65 ( 0.35 )	0.67 ( 0.2 )	-0.58 ( -2.29 )
Smooth Muscle Cell Neoplasm	2	0.92 ( 0.22 - 3.82 )	0.92 ( 0.01 )	0.92 ( 0.28 )	-0.11 ( -1.84 )
Haemorrhagic Diathesis	2	4.86 ( 1.01 - 23.42 )	4.86 ( 4.77 )	4 ( 1.08 )	2 ( 0.1 )
Anaphylactic Reaction	2	0.56 ( 0.14 - 2.28 )	0.56 ( 0.68 )	0.57 ( 0.18 )	-0.81 ( -2.51 )
Parvovirus B19 Infection	2	0.41 ( 0.1 - 1.67 )	0.41 ( 1.66 )	0.42 ( 0.13 )	-1.24 ( -2.93 )
Constipation	2	0.32 ( 0.08 - 1.3 )	0.32 ( 2.82 )	0.33 ( 0.1 )	-1.58 ( -3.27 )
Dysgeusia	2	1.36 ( 0.32 - 5.75 )	1.36 ( 0.18 )	1.33 ( 0.4 )	0.42 ( -1.34 )
Proctalgia	2	1.36 ( 0.32 - 5.75 )	1.36 ( 0.18 )	1.33 ( 0.4 )	0.42 ( -1.34 )
Paraplegia	2	3.09 ( 0.69 - 13.97 )	3.09 ( 2.4 )	2.77 ( 0.79 )	1.47 ( -0.36 )
Disseminated Mucormycosis	2	1.1 ( 0.26 - 4.59 )	1.1 ( 0.02 )	1.09 ( 0.33 )	0.13 ( -1.61 )
Jaundice	2	0.25 ( 0.06 - 1.02 )	0.25 ( 4.37 )	0.26 ( 0.08 )	-1.93 ( -3.61 )
Hepatic Encephalopathy	2	0.79 ( 0.19 - 3.27 )	0.79 ( 0.1 )	0.8 ( 0.24 )	-0.32 ( -2.04 )
Protein-Losing Gastroenteropathy	2	2.43 ( 0.55 - 10.7 )	2.43 ( 1.47 )	2.25 ( 0.65 )	1.17 ( -0.64 )
Nephrocalcinosis	2	6.81 ( 1.32 - 35.1 )	6.81 ( 7.08 )	5.15 ( 1.31 )	2.36 ( 0.41 )
Chronic Graft Versus Host Disease In Intestine	2	0.64 ( 0.16 - 2.64 )	0.64 ( 0.38 )	0.66 ( 0.2 )	-0.61 ( -2.32 )
Rotavirus Infection	2	1.79 ( 0.42 - 7.69 )	1.79 ( 0.63 )	1.72 ( 0.51 )	0.78 ( -1 )
Mycobacterium Kansasii Infection	2	2.84 ( 0.63 - 12.68 )	2.84 ( 2.04 )	2.57 ( 0.74 )	1.36 ( -0.46 )
Blood Pressure Increased	2	0.25 ( 0.06 - 1.03 )	0.25 ( 4.32 )	0.26 ( 0.08 )	-1.92 ( -3.6 )
Cytokine Abnormal	2	Inf ( NaN - Inf )	Inf ( 34.04 )	18.02 ( 0 )	4.17 ( 1.82 )
Hyperpyrexia	2	3.09 ( 0.69 - 13.97 )	3.09 ( 2.4 )	2.77 ( 0.79 )	1.47 ( -0.36 )
Chills	2	0.16 ( 0.04 - 0.63 )	0.16 ( 9.05 )	0.16 ( 0.05 )	-2.61 ( -4.29 )
Peripheral Swelling	2	0.67 ( 0.16 - 2.74 )	0.67 ( 0.32 )	0.68 ( 0.21 )	-0.56 ( -2.27 )
Alveolar Proteinosis	2	1.89 ( 0.44 - 8.15 )	1.89 ( 0.76 )	1.8 ( 0.53 )	0.85 ( -0.93 )
Iron Overload	2	1.7 ( 0.4 - 7.28 )	1.7 ( 0.53 )	1.64 ( 0.49 )	0.71 ( -1.06 )
Encephalomyelitis	2	2.84 ( 0.63 - 12.68 )	2.84 ( 2.04 )	2.57 ( 0.74 )	1.36 ( -0.46 )
Dysbiosis	2	2 ( 0.46 - 8.67 )	2 ( 0.9 )	1.9 ( 0.56 )	0.92 ( -0.86 )
Adenomatous Polyposis Coli	2	8.51 ( 1.56 - 46.48 )	8.51 ( 8.84 )	6.01 ( 1.45 )	2.59 ( 0.6 )
Dry Eye	2	1.03 ( 0.25 - 4.3 )	1.03 ( 0 )	1.03 ( 0.31 )	0.04 ( -1.69 )
Dry Mouth	2	1.13 ( 0.27 - 4.75 )	1.13 ( 0.03 )	1.13 ( 0.34 )	0.17 ( -1.57 )
Eye Pain	2	1.06 ( 0.25 - 4.44 )	1.06 ( 0.01 )	1.06 ( 0.32 )	0.08 ( -1.65 )
Hypercholesterolaemia	2	1.36 ( 0.32 - 5.75 )	1.36 ( 0.18 )	1.33 ( 0.4 )	0.42 ( -1.34 )
Lichenoid Keratosis	2	2.13 ( 0.49 - 9.26 )	2.13 ( 1.06 )	2 ( 0.59 )	1 ( -0.79 )
Meningioma	2	3.4 ( 0.75 - 15.54 )	3.4 ( 2.83 )	3 ( 0.84 )	1.59 ( -0.26 )
Poikiloderma	2	3.09 ( 0.69 - 13.97 )	3.09 ( 2.4 )	2.77 ( 0.79 )	1.47 ( -0.36 )
Reticulocytosis	2	2.62 ( 0.59 - 11.61 )	2.62 ( 1.73 )	2.4 ( 0.69 )	1.26 ( -0.55 )
Skin Hypertrophy	2	3.78 ( 0.82 - 17.51 )	3.78 ( 3.35 )	3.28 ( 0.91 )	1.71 ( -0.15 )
Blood Alkaline Phosphatase Increased	2	0.27 ( 0.07 - 1.09 )	0.27 ( 3.88 )	0.28 ( 0.09 )	-1.83 ( -3.51 )
Blood Creatinine Increased	2	0.05 ( 0.01 - 0.22 )	0.05 ( 32.91 )	0.06 ( 0.02 )	-4.12 ( -5.79 )
Blood Lactate Dehydrogenase Increased	2	0.22 ( 0.05 - 0.89 )	0.22 ( 5.42 )	0.23 ( 0.07 )	-2.11 ( -3.8 )
Chronic Graft Versus Host Disease In Eye	2	1 ( 0.24 - 4.17 )	1 ( 0 )	1 ( 0.3 )	0 ( -1.73 )
Haptoglobin Decreased	2	1.31 ( 0.31 - 5.52 )	1.31 ( 0.14 )	1.29 ( 0.39 )	0.36 ( -1.39 )
Campylobacter Infection	2	2.27 ( 0.52 - 9.93 )	2.27 ( 1.25 )	2.12 ( 0.62 )	1.08 ( -0.72 )
Pure White Cell Aplasia	2	34.05 ( 3.09 - 375.52 )	34.04 ( 21.38 )	12.01 ( 1.61 )	3.59 ( 1.38 )
Pleurisy	2	1.1 ( 0.26 - 4.59 )	1.1 ( 0.02 )	1.09 ( 0.33 )	0.13 ( -1.61 )
Chest Pain	2	0.22 ( 0.05 - 0.87 )	0.22 ( 5.65 )	0.23 ( 0.07 )	-2.15 ( -3.83 )
Oligospermia	2	34.05 ( 3.09 - 375.52 )	34.04 ( 21.38 )	12.01 ( 1.61 )	3.59 ( 1.38 )
Inflammatory Myofibroblastic Tumour	2	8.51 ( 1.56 - 46.48 )	8.51 ( 8.84 )	6.01 ( 1.45 )	2.59 ( 0.6 )
Aphasia	2	0.32 ( 0.08 - 1.29 )	0.32 ( 2.87 )	0.33 ( 0.1 )	-1.6 ( -3.29 )
Oesophageal Squamous Cell Carcinoma	2	4.26 ( 0.9 - 20.04 )	4.25 ( 3.98 )	3.6 ( 0.99 )	1.85 ( -0.03 )
Small Cell Lung Cancer	2	4.86 ( 1.01 - 23.42 )	4.86 ( 4.77 )	4 ( 1.08 )	2 ( 0.1 )
Fanconi Syndrome Acquired	2	5.67 ( 1.15 - 28.12 )	5.67 ( 5.77 )	4.5 ( 1.18 )	2.17 ( 0.25 )
Intestinal Stenosis	2	34.05 ( 3.09 - 375.52 )	34.04 ( 21.38 )	12.01 ( 1.61 )	3.59 ( 1.38 )
Urinary Retention	2	0.58 ( 0.14 - 2.36 )	0.58 ( 0.6 )	0.59 ( 0.18 )	-0.76 ( -2.47 )
Insomnia	2	0.27 ( 0.07 - 1.07 )	0.27 ( 3.99 )	0.28 ( 0.09 )	-1.85 ( -3.54 )
Chronic Respiratory Disease	2	34.05 ( 3.09 - 375.52 )	34.04 ( 21.38 )	12.01 ( 1.61 )	3.59 ( 1.38 )
Cord Colitis Syndrome	2	Inf ( NaN - Inf )	Inf ( 34.04 )	18.02 ( 0 )	4.17 ( 1.82 )
Polyomavirus-Associated Nephropathy	2	0.1 ( 0.03 - 0.4 )	0.1 ( 15.94 )	0.11 ( 0.03 )	-3.23 ( -4.91 )
Pleuroparenchymal Fibroelastosis	2	17.02 ( 2.4 - 120.87 )	17.02 ( 15.08 )	9.01 ( 1.75 )	3.17 ( 1.06 )
Varices Oesophageal	2	6.81 ( 1.32 - 35.1 )	6.81 ( 7.08 )	5.15 ( 1.31 )	2.36 ( 0.41 )
Memory Impairment	2	0.52 ( 0.13 - 2.11 )	0.52 ( 0.88 )	0.53 ( 0.16 )	-0.92 ( -2.62 )
Atrial Thrombosis	2	4.86 ( 1.01 - 23.42 )	4.86 ( 4.77 )	4 ( 1.08 )	2 ( 0.1 )
Pancreatitis	2	0.29 ( 0.07 - 1.16 )	0.29 ( 3.51 )	0.3 ( 0.09 )	-1.75 ( -3.43 )
Short Stature	2	2.13 ( 0.49 - 9.26 )	2.13 ( 1.06 )	2 ( 0.59 )	1 ( -0.79 )
Herpes Simplex Reactivation	2	1.89 ( 0.44 - 8.15 )	1.89 ( 0.76 )	1.8 ( 0.53 )	0.85 ( -0.93 )
Red Blood Cell Sedimentation Rate Increased	2	4.86 ( 1.01 - 23.42 )	4.86 ( 4.77 )	4 ( 1.08 )	2 ( 0.1 )
Joint Effusion	2	8.51 ( 1.56 - 46.48 )	8.51 ( 8.84 )	6.01 ( 1.45 )	2.59 ( 0.6 )
Ill-Defined Disorder	2	1.17 ( 0.28 - 4.92 )	1.17 ( 0.05 )	1.16 ( 0.35 )	0.22 ( -1.53 )
Still'S Disease	2	3.4 ( 0.75 - 15.54 )	3.4 ( 2.83 )	3 ( 0.84 )	1.59 ( -0.26 )
Osteopenia	2	0.79 ( 0.19 - 3.27 )	0.79 ( 0.1 )	0.8 ( 0.24 )	-0.32 ( -2.04 )
Secondary Adrenocortical Insufficiency	2	17.02 ( 2.4 - 120.87 )	17.02 ( 15.08 )	9.01 ( 1.75 )	3.17 ( 1.06 )
Duodenal Ulcer Haemorrhage	2	2.27 ( 0.52 - 9.93 )	2.27 ( 1.25 )	2.12 ( 0.62 )	1.08 ( -0.72 )
Transplantation Associated Food Allergy	2	11.35 ( 1.9 - 67.93 )	11.35 ( 11.32 )	7.21 ( 1.61 )	2.85 ( 0.81 )
Endothelial Dysfunction	2	4.26 ( 0.9 - 20.04 )	4.25 ( 3.98 )	3.6 ( 0.99 )	1.85 ( -0.03 )
Human Herpesvirus 8 Infection	2	0.79 ( 0.19 - 3.27 )	0.79 ( 0.1 )	0.8 ( 0.24 )	-0.32 ( -2.04 )
Human Herpesvirus 7 Infection	2	3.09 ( 0.69 - 13.97 )	3.09 ( 2.4 )	2.77 ( 0.79 )	1.47 ( -0.36 )
Myelitis	2	1.26 ( 0.3 - 5.3 )	1.26 ( 0.1 )	1.24 ( 0.37 )	0.31 ( -1.43 )
Necrotising Fasciitis	2	1.62 ( 0.38 - 6.91 )	1.62 ( 0.43 )	1.57 ( 0.47 )	0.65 ( -1.12 )
Demyelinating Polyneuropathy	2	1.48 ( 0.35 - 6.28 )	1.48 ( 0.29 )	1.44 ( 0.43 )	0.53 ( -1.23 )
Immunodeficiency	2	1 ( 0.24 - 4.17 )	1 ( 0 )	1 ( 0.3 )	0 ( -1.73 )
Abdominal Pain Upper	2	0.27 ( 0.07 - 1.09 )	0.27 ( 3.88 )	0.28 ( 0.09 )	-1.83 ( -3.51 )
Duodenitis	2	1.48 ( 0.35 - 6.28 )	1.48 ( 0.29 )	1.44 ( 0.43 )	0.53 ( -1.23 )
Donor Specific Antibody Present	2	1.03 ( 0.25 - 4.3 )	1.03 ( 0 )	1.03 ( 0.31 )	0.04 ( -1.69 )
Microangiopathic Haemolytic Anaemia	2	0.97 ( 0.23 - 4.04 )	0.97 ( 0 )	0.97 ( 0.3 )	-0.04 ( -1.77 )
Acquired Haemophilia	2	4.86 ( 1.01 - 23.42 )	4.86 ( 4.77 )	4 ( 1.08 )	2 ( 0.1 )
Pneumonia Parainfluenzae Viral	2	3.09 ( 0.69 - 13.97 )	3.09 ( 2.4 )	2.77 ( 0.79 )	1.47 ( -0.36 )
Oral Herpes	2	0.52 ( 0.13 - 2.11 )	0.52 ( 0.88 )	0.53 ( 0.16 )	-0.92 ( -2.62 )
Pneumonia Streptococcal	2	1.48 ( 0.35 - 6.28 )	1.48 ( 0.29 )	1.44 ( 0.43 )	0.53 ( -1.23 )
Multisystem Inflammatory Syndrome In Children	2	5.67 ( 1.15 - 28.12 )	5.67 ( 5.77 )	4.5 ( 1.18 )	2.17 ( 0.25 )
Ataxia	2	1 ( 0.24 - 4.17 )	1 ( 0 )	1 ( 0.3 )	0 ( -1.73 )
Gingivitis	2	5.67 ( 1.15 - 28.12 )	5.67 ( 5.77 )	4.5 ( 1.18 )	2.17 ( 0.25 )
Oesophageal Carcinoma	2	0.74 ( 0.18 - 3.05 )	0.74 ( 0.18 )	0.75 ( 0.23 )	-0.41 ( -2.13 )
Metapneumovirus Pneumonia	2	11.35 ( 1.9 - 67.93 )	11.35 ( 11.32 )	7.21 ( 1.61 )	2.85 ( 0.81 )
Cytomegalovirus Gastroenteritis	2	1.26 ( 0.3 - 5.3 )	1.26 ( 0.1 )	1.24 ( 0.37 )	0.31 ( -1.43 )
Sinusitis Aspergillus	2	34.05 ( 3.09 - 375.52 )	34.04 ( 21.38 )	12.01 ( 1.61 )	3.59 ( 1.38 )
Enterovirus Infection	2	1.17 ( 0.28 - 4.92 )	1.17 ( 0.05 )	1.16 ( 0.35 )	0.22 ( -1.53 )
Odynophagia	2	0.85 ( 0.21 - 3.52 )	0.85 ( 0.05 )	0.86 ( 0.26 )	-0.22 ( -1.94 )
Congenital Aplasia	2	3.09 ( 0.69 - 13.97 )	3.09 ( 2.4 )	2.77 ( 0.79 )	1.47 ( -0.36 )
Arrhythmia	2	0.77 ( 0.19 - 3.19 )	0.77 ( 0.13 )	0.78 ( 0.24 )	-0.35 ( -2.07 )
Muscle Fatigue	2	11.35 ( 1.9 - 67.93 )	11.35 ( 11.32 )	7.21 ( 1.61 )	2.85 ( 0.81 )
Myocardial Injury	2	34.05 ( 3.09 - 375.52 )	34.04 ( 21.38 )	12.01 ( 1.61 )	3.59 ( 1.38 )
Serratia Sepsis	2	3.4 ( 0.75 - 15.54 )	3.4 ( 2.83 )	3 ( 0.84 )	1.59 ( -0.26 )
Stupor	2	2.27 ( 0.52 - 9.93 )	2.27 ( 1.25 )	2.12 ( 0.62 )	1.08 ( -0.72 )
Liver Function Test Increased	2	1.22 ( 0.29 - 5.1 )	1.22 ( 0.07 )	1.2 ( 0.36 )	0.26 ( -1.48 )
Blood Testosterone Decreased	2	5.67 ( 1.15 - 28.12 )	5.67 ( 5.77 )	4.5 ( 1.18 )	2.17 ( 0.25 )
Sperm Concentration Decreased	2	6.81 ( 1.32 - 35.1 )	6.81 ( 7.08 )	5.15 ( 1.31 )	2.36 ( 0.41 )
Varicocele	2	8.51 ( 1.56 - 46.48 )	8.51 ( 8.84 )	6.01 ( 1.45 )	2.59 ( 0.6 )
Fracture	2	1.48 ( 0.35 - 6.28 )	1.48 ( 0.29 )	1.44 ( 0.43 )	0.53 ( -1.23 )
Status Epilepticus	2	0.57 ( 0.14 - 2.32 )	0.57 ( 0.64 )	0.58 ( 0.18 )	-0.78 ( -2.49 )
Metabolic Acidosis	2	0.25 ( 0.06 - 1 )	0.25 ( 4.54 )	0.26 ( 0.08 )	-1.96 ( -3.64 )
Weight Gain Poor	2	17.02 ( 2.4 - 120.87 )	17.02 ( 15.08 )	9.01 ( 1.75 )	3.17 ( 1.06 )
Failure To Thrive	2	1.03 ( 0.25 - 4.3 )	1.03 ( 0 )	1.03 ( 0.31 )	0.04 ( -1.69 )
Oxygen Saturation Decreased	2	0.26 ( 0.07 - 1.07 )	0.26 ( 4.05 )	0.28 ( 0.09 )	-1.86 ( -3.55 )
Encephalitis Autoimmune	2	1.62 ( 0.38 - 6.91 )	1.62 ( 0.43 )	1.57 ( 0.47 )	0.65 ( -1.12 )
Mycoplasma Infection	2	2.84 ( 0.63 - 12.68 )	2.84 ( 2.04 )	2.57 ( 0.74 )	1.36 ( -0.46 )
Immunosuppression	2	0.81 ( 0.2 - 3.35 )	0.81 ( 0.08 )	0.82 ( 0.25 )	-0.29 ( -2.01 )
Hypothalamo-Pituitary Disorder	2	2.13 ( 0.49 - 9.26 )	2.13 ( 1.06 )	2 ( 0.59 )	1 ( -0.79 )
Vasculitis	2	1.55 ( 0.36 - 6.58 )	1.55 ( 0.35 )	1.5 ( 0.45 )	0.59 ( -1.18 )
Toxic Erythema Of Chemotherapy	2	5.67 ( 1.15 - 28.12 )	5.67 ( 5.77 )	4.5 ( 1.18 )	2.17 ( 0.25 )
Blood Bilirubin Abnormal	2	8.51 ( 1.56 - 46.48 )	8.51 ( 8.84 )	6.01 ( 1.45 )	2.59 ( 0.6 )
Continuous Haemodiafiltration	2	3.4 ( 0.75 - 15.54 )	3.4 ( 2.83 )	3 ( 0.84 )	1.59 ( -0.26 )
Tachypnoea	2	0.44 ( 0.11 - 1.8 )	0.44 ( 1.37 )	0.46 ( 0.14 )	-1.13 ( -2.83 )
Urine Output Decreased	2	0.46 ( 0.11 - 1.87 )	0.46 ( 1.24 )	0.47 ( 0.15 )	-1.08 ( -2.77 )
Leukaemic Infiltration Pulmonary	2	17.02 ( 2.4 - 120.87 )	17.02 ( 15.08 )	9.01 ( 1.75 )	3.17 ( 1.06 )
Uterine Disorder	2	17.02 ( 2.4 - 120.87 )	17.02 ( 15.08 )	9.01 ( 1.75 )	3.17 ( 1.06 )
Tenderness	1	2.43 ( 0.3 - 19.77 )	2.43 ( 0.74 )	2.25 ( 0.39 )	1.17 ( -1.08 )
Central Nervous System Haemorrhage	1	2.84 ( 0.34 - 23.57 )	2.84 ( 1.02 )	2.57 ( 0.44 )	1.36 ( -0.92 )
Pericarditis Uraemic	1	Inf ( NaN - Inf )	Inf ( 17.02 )	18.02 ( 0 )	4.17 ( 1.29 )
Central Venous Catheterisation	1	8.51 ( 0.77 - 93.87 )	8.51 ( 4.42 )	6.01 ( 0.81 )	2.59 ( 0.09 )
Vulvovaginal Injury	1	Inf ( NaN - Inf )	Inf ( 17.02 )	18.02 ( 0 )	4.17 ( 1.29 )
Adenovirus Test Positive	1	1.89 ( 0.24 - 14.93 )	1.89 ( 0.38 )	1.8 ( 0.32 )	0.85 ( -1.37 )
Hepatitis Fulminant	1	0.52 ( 0.07 - 3.77 )	0.52 ( 0.44 )	0.53 ( 0.1 )	-0.92 ( -3.01 )
Incorrect Drug Administration Rate	1	8.51 ( 0.77 - 93.87 )	8.51 ( 4.42 )	6.01 ( 0.81 )	2.59 ( 0.09 )
T-Lymphocyte Count Decreased	1	1.7 ( 0.22 - 13.3 )	1.7 ( 0.26 )	1.64 ( 0.29 )	0.71 ( -1.49 )
Plasma Cell Myeloma Recurrent	1	0.95 ( 0.13 - 7.08 )	0.95 ( 0 )	0.95 ( 0.18 )	-0.08 ( -2.22 )
Gastric Antral Vascular Ectasia	1	2.43 ( 0.3 - 19.77 )	2.43 ( 0.74 )	2.25 ( 0.39 )	1.17 ( -1.08 )
Ophthalmic Herpes Zoster	1	2.43 ( 0.3 - 19.77 )	2.43 ( 0.74 )	2.25 ( 0.39 )	1.17 ( -1.08 )
Vulval Haemorrhage	1	17.02 ( 1.06 - 272.17 )	17.02 ( 7.54 )	9.01 ( 0.89 )	3.17 ( 0.54 )
Jaundice Cholestatic	1	1.42 ( 0.18 - 10.91 )	1.42 ( 0.11 )	1.39 ( 0.25 )	0.47 ( -1.71 )
Malocclusion	1	8.51 ( 0.77 - 93.87 )	8.51 ( 4.42 )	6.01 ( 0.81 )	2.59 ( 0.09 )
Mastication Disorder	1	Inf ( NaN - Inf )	Inf ( 17.02 )	18.02 ( 0 )	4.17 ( 1.29 )
Speech Disorder	1	0.41 ( 0.06 - 2.94 )	0.41 ( 0.85 )	0.42 ( 0.08 )	-1.25 ( -3.34 )
Tooth Impacted	1	8.51 ( 0.77 - 93.87 )	8.51 ( 4.42 )	6.01 ( 0.81 )	2.59 ( 0.09 )
Hiatus Hernia	1	2.13 ( 0.27 - 17.01 )	2.13 ( 0.53 )	2 ( 0.35 )	1 ( -1.23 )
Ileal Perforation	1	4.26 ( 0.48 - 38.08 )	4.25 ( 1.99 )	3.6 ( 0.58 )	1.85 ( -0.51 )
Swelling	1	0.18 ( 0.02 - 1.28 )	0.18 ( 3.72 )	0.19 ( 0.04 )	-2.41 ( -4.47 )
Cholecystitis Infective	1	2.84 ( 0.34 - 23.57 )	2.84 ( 1.02 )	2.57 ( 0.44 )	1.36 ( -0.92 )
Body Height Below Normal	1	2.84 ( 0.34 - 23.57 )	2.84 ( 1.02 )	2.57 ( 0.44 )	1.36 ( -0.92 )
Glaucoma	1	1.7 ( 0.22 - 13.3 )	1.7 ( 0.26 )	1.64 ( 0.29 )	0.71 ( -1.49 )
Precocious Puberty	1	8.51 ( 0.77 - 93.87 )	8.51 ( 4.42 )	6.01 ( 0.81 )	2.59 ( 0.09 )
Genital Herpes	1	2.43 ( 0.3 - 19.77 )	2.43 ( 0.74 )	2.25 ( 0.39 )	1.17 ( -1.08 )
Urinary Tract Infection Enterococcal	1	0.68 ( 0.09 - 5.02 )	0.68 ( 0.14 )	0.69 ( 0.13 )	-0.53 ( -2.64 )
Strongyloidiasis	1	0.3 ( 0.04 - 2.2 )	0.3 ( 1.57 )	0.32 ( 0.06 )	-1.66 ( -3.74 )
Vertigo Positional	1	4.26 ( 0.48 - 38.08 )	4.25 ( 1.99 )	3.6 ( 0.58 )	1.85 ( -0.51 )
Haemolytic Uraemic Syndrome	1	0.25 ( 0.03 - 1.8 )	0.25 ( 2.21 )	0.26 ( 0.05 )	-1.94 ( -4.01 )
Renal Oncocytoma	1	17.02 ( 1.06 - 272.17 )	17.02 ( 7.54 )	9.01 ( 0.89 )	3.17 ( 0.54 )
Ear Infection	1	0.71 ( 0.1 - 5.24 )	0.71 ( 0.11 )	0.72 ( 0.14 )	-0.47 ( -2.59 )
Gastroenteritis Escherichia Coli	1	1.31 ( 0.17 - 10.01 )	1.31 ( 0.07 )	1.29 ( 0.23 )	0.36 ( -1.81 )
Pneumothorax Traumatic	1	Inf ( NaN - Inf )	Inf ( 17.02 )	18.02 ( 0 )	4.17 ( 1.29 )
Skin Toxicity	1	0.23 ( 0.03 - 1.68 )	0.23 ( 2.49 )	0.24 ( 0.05 )	-2.04 ( -4.11 )
Pollakiuria	1	0.5 ( 0.07 - 3.66 )	0.5 ( 0.48 )	0.51 ( 0.1 )	-0.96 ( -3.05 )
Mucosal Toxicity	1	1.55 ( 0.2 - 11.99 )	1.55 ( 0.18 )	1.5 ( 0.27 )	0.59 ( -1.61 )
Acarodermatitis	1	2.13 ( 0.27 - 17.01 )	2.13 ( 0.53 )	2 ( 0.35 )	1 ( -1.23 )
Campylobacter Gastroenteritis	1	2.84 ( 0.34 - 23.57 )	2.84 ( 1.02 )	2.57 ( 0.44 )	1.36 ( -0.92 )
Infected Bite	1	Inf ( NaN - Inf )	Inf ( 17.02 )	18.02 ( 0 )	4.17 ( 1.29 )
Tetany	1	5.67 ( 0.59 - 54.55 )	5.67 ( 2.89 )	4.5 ( 0.68 )	2.17 ( -0.24 )
Palmar-Plantar Erythrodysaesthesia Syndrome	1	0.28 ( 0.04 - 2.01 )	0.28 ( 1.83 )	0.29 ( 0.06 )	-1.78 ( -3.86 )
Electrocardiogram Abnormal	1	2.13 ( 0.27 - 17.01 )	2.13 ( 0.53 )	2 ( 0.35 )	1 ( -1.23 )
Hypokalaemic Syndrome	1	Inf ( NaN - Inf )	Inf ( 17.02 )	18.02 ( 0 )	4.17 ( 1.29 )
Viral Test Positive	1	3.4 ( 0.4 - 29.14 )	3.4 ( 1.41 )	3 ( 0.5 )	1.59 ( -0.73 )
Cystitis Interstitial	1	17.02 ( 1.06 - 272.17 )	17.02 ( 7.54 )	9.01 ( 0.89 )	3.17 ( 0.54 )
Osteonecrosis	1	0.13 ( 0.02 - 0.96 )	0.13 ( 5.56 )	0.14 ( 0.03 )	-2.83 ( -4.88 )
Neurodegenerative Disorder	1	Inf ( NaN - Inf )	Inf ( 17.02 )	18.02 ( 0 )	4.17 ( 1.29 )
Rash Papular	1	0.55 ( 0.07 - 4.02 )	0.55 ( 0.36 )	0.56 ( 0.11 )	-0.83 ( -2.93 )
Rash Vesicular	1	2.13 ( 0.27 - 17.01 )	2.13 ( 0.53 )	2 ( 0.35 )	1 ( -1.23 )
Extravasation	1	4.26 ( 0.48 - 38.08 )	4.25 ( 1.99 )	3.6 ( 0.58 )	1.85 ( -0.51 )
Skin Irritation	1	17.02 ( 1.06 - 272.17 )	17.02 ( 7.54 )	9.01 ( 0.89 )	3.17 ( 0.54 )
Acute Myocardial Infarction	1	0.39 ( 0.05 - 2.81 )	0.39 ( 0.95 )	0.4 ( 0.08 )	-1.32 ( -3.4 )
Gastrointestinal Injury	1	3.4 ( 0.4 - 29.14 )	3.4 ( 1.41 )	3 ( 0.5 )	1.59 ( -0.73 )
Blood Culture Positive	1	0.37 ( 0.05 - 2.68 )	0.37 ( 1.05 )	0.38 ( 0.07 )	-1.38 ( -3.47 )
Vulvovaginal Erythema	1	17.02 ( 1.06 - 272.17 )	17.02 ( 7.54 )	9.01 ( 0.89 )	3.17 ( 0.54 )
Pain In Extremity	1	0.16 ( 0.02 - 1.16 )	0.16 ( 4.29 )	0.17 ( 0.03 )	-2.56 ( -4.62 )
Pneumatosis	1	2.13 ( 0.27 - 17.01 )	2.13 ( 0.53 )	2 ( 0.35 )	1 ( -1.23 )
Hand-Foot-Genital Syndrome	1	Inf ( NaN - Inf )	Inf ( 17.02 )	18.02 ( 0 )	4.17 ( 1.29 )
Corneal Leukoma	1	Inf ( NaN - Inf )	Inf ( 17.02 )	18.02 ( 0 )	4.17 ( 1.29 )
Corneal Scar	1	8.51 ( 0.77 - 93.87 )	8.51 ( 4.42 )	6.01 ( 0.81 )	2.59 ( 0.09 )
Injury	1	1.06 ( 0.14 - 8.02 )	1.06 ( 0 )	1.06 ( 0.2 )	0.08 ( -2.07 )
Lymphoedema	1	0.77 ( 0.1 - 5.74 )	0.77 ( 0.06 )	0.78 ( 0.15 )	-0.35 ( -2.48 )
Auditory Disorder	1	Inf ( NaN - Inf )	Inf ( 17.02 )	18.02 ( 0 )	4.17 ( 1.29 )
Electroencephalogram Abnormal	1	0.81 ( 0.11 - 6.03 )	0.81 ( 0.04 )	0.82 ( 0.15 )	-0.29 ( -2.42 )
Venous Haemorrhage	1	1.89 ( 0.24 - 14.93 )	1.89 ( 0.38 )	1.8 ( 0.32 )	0.85 ( -1.37 )
Weight Decreased	1	0.06 ( 0.01 - 0.44 )	0.06 ( 14.37 )	0.06 ( 0.01 )	-3.95 ( -6 )
Hepatic Pain	1	2.13 ( 0.27 - 17.01 )	2.13 ( 0.53 )	2 ( 0.35 )	1 ( -1.23 )
Vulvovaginal Candidiasis	1	2.84 ( 0.34 - 23.57 )	2.84 ( 1.02 )	2.57 ( 0.44 )	1.36 ( -0.92 )
Vulvovaginal Pruritus	1	1.7 ( 0.22 - 13.3 )	1.7 ( 0.26 )	1.64 ( 0.29 )	0.71 ( -1.49 )
Renal Tubular Disorder	1	0.44 ( 0.06 - 3.18 )	0.44 ( 0.71 )	0.45 ( 0.09 )	-1.15 ( -3.24 )
Petechiae	1	0.44 ( 0.06 - 3.18 )	0.44 ( 0.71 )	0.45 ( 0.09 )	-1.15 ( -3.24 )
Subcutaneous Emphysema	1	1 ( 0.13 - 7.52 )	1 ( 0 )	1 ( 0.19 )	0 ( -2.14 )
Pulmonary Vein Occlusion	1	Inf ( NaN - Inf )	Inf ( 17.02 )	18.02 ( 0 )	4.17 ( 1.29 )
Infective Uveitis	1	Inf ( NaN - Inf )	Inf ( 17.02 )	18.02 ( 0 )	4.17 ( 1.29 )
Hyperglycaemia	1	0.1 ( 0.01 - 0.7 )	0.1 ( 8.28 )	0.1 ( 0.02 )	-3.28 ( -5.33 )
Type 2 Diabetes Mellitus	1	0.65 ( 0.09 - 4.82 )	0.65 ( 0.18 )	0.67 ( 0.13 )	-0.58 ( -2.7 )
Autoimmune Lymphoproliferative Syndrome	1	4.26 ( 0.48 - 38.08 )	4.25 ( 1.99 )	3.6 ( 0.58 )	1.85 ( -0.51 )
Faeces Discoloured	1	1.22 ( 0.16 - 9.25 )	1.22 ( 0.04 )	1.2 ( 0.22 )	0.26 ( -1.9 )
Faeces Soft	1	0.85 ( 0.11 - 6.34 )	0.85 ( 0.02 )	0.86 ( 0.16 )	-0.22 ( -2.35 )
B-Cell Lymphoma	1	0.32 ( 0.04 - 2.28 )	0.32 ( 1.46 )	0.33 ( 0.06 )	-1.61 ( -3.69 )
Megacolon	1	8.51 ( 0.77 - 93.87 )	8.51 ( 4.42 )	6.01 ( 0.81 )	2.59 ( 0.09 )
Post Procedural Sepsis	1	8.51 ( 0.77 - 93.87 )	8.51 ( 4.42 )	6.01 ( 0.81 )	2.59 ( 0.09 )
Bone Abscess	1	Inf ( NaN - Inf )	Inf ( 17.02 )	18.02 ( 0 )	4.17 ( 1.29 )
Drug Clearance Increased	1	Inf ( NaN - Inf )	Inf ( 17.02 )	18.02 ( 0 )	4.17 ( 1.29 )
Streptococcus Test Positive	1	2.43 ( 0.3 - 19.77 )	2.43 ( 0.74 )	2.25 ( 0.39 )	1.17 ( -1.08 )
Asthenia	1	0.06 ( 0.01 - 0.42 )	0.06 ( 14.9 )	0.06 ( 0.01 )	-4 ( -6.05 )
Night Sweats	1	0.9 ( 0.12 - 6.69 )	0.9 ( 0.01 )	0.9 ( 0.17 )	-0.15 ( -2.29 )
Adenoviral Conjunctivitis	1	17.02 ( 1.06 - 272.17 )	17.02 ( 7.54 )	9.01 ( 0.89 )	3.17 ( 0.54 )
Spirochaetal Infection	1	8.51 ( 0.77 - 93.87 )	8.51 ( 4.42 )	6.01 ( 0.81 )	2.59 ( 0.09 )
Nasopharyngitis	1	0.22 ( 0.03 - 1.59 )	0.22 ( 2.71 )	0.23 ( 0.04 )	-2.11 ( -4.18 )
Genital Labial Adhesions	1	17.02 ( 1.06 - 272.17 )	17.02 ( 7.54 )	9.01 ( 0.89 )	3.17 ( 0.54 )
Haematocolpos	1	17.02 ( 1.06 - 272.17 )	17.02 ( 7.54 )	9.01 ( 0.89 )	3.17 ( 0.54 )
Hypogonadism Female	1	1.89 ( 0.24 - 14.93 )	1.89 ( 0.38 )	1.8 ( 0.32 )	0.85 ( -1.37 )
Type 1 Diabetes Mellitus	1	0.85 ( 0.11 - 6.34 )	0.85 ( 0.02 )	0.86 ( 0.16 )	-0.22 ( -2.35 )
Electrocardiogram T Wave Amplitude Decreased	1	3.4 ( 0.4 - 29.14 )	3.4 ( 1.41 )	3 ( 0.5 )	1.59 ( -0.73 )
Electrocardiogram T Wave Biphasic	1	4.26 ( 0.48 - 38.08 )	4.25 ( 1.99 )	3.6 ( 0.58 )	1.85 ( -0.51 )
Torsade De Pointes	1	1.7 ( 0.22 - 13.3 )	1.7 ( 0.26 )	1.64 ( 0.29 )	0.71 ( -1.49 )
Ventricular Fibrillation	1	0.85 ( 0.11 - 6.34 )	0.85 ( 0.02 )	0.86 ( 0.16 )	-0.22 ( -2.35 )
Cutaneous T-Cell Lymphoma	1	4.26 ( 0.48 - 38.08 )	4.25 ( 1.99 )	3.6 ( 0.58 )	1.85 ( -0.51 )
Hypertensive Crisis	1	0.65 ( 0.09 - 4.82 )	0.65 ( 0.18 )	0.67 ( 0.13 )	-0.58 ( -2.7 )
Vascular Malformation	1	8.51 ( 0.77 - 93.87 )	8.51 ( 4.42 )	6.01 ( 0.81 )	2.59 ( 0.09 )
Hyperkinesia	1	17.02 ( 1.06 - 272.17 )	17.02 ( 7.54 )	9.01 ( 0.89 )	3.17 ( 0.54 )
Mycobacterium Abscessus Infection	1	0.74 ( 0.1 - 5.48 )	0.74 ( 0.09 )	0.75 ( 0.14 )	-0.41 ( -2.53 )
Ventricular Dysfunction	1	0.59 ( 0.08 - 4.31 )	0.59 ( 0.28 )	0.6 ( 0.11 )	-0.74 ( -2.84 )
Ovarian Sertoli-Leydig Cell Tumour	1	Inf ( NaN - Inf )	Inf ( 17.02 )	18.02 ( 0 )	4.17 ( 1.29 )
Myelitis Transverse	1	0.63 ( 0.09 - 4.64 )	0.63 ( 0.21 )	0.64 ( 0.12 )	-0.64 ( -2.75 )
Pneumonia Staphylococcal	1	0.43 ( 0.06 - 3.1 )	0.43 ( 0.76 )	0.44 ( 0.08 )	-1.19 ( -3.27 )
Viral Hepatitis Carrier	1	Inf ( NaN - Inf )	Inf ( 17.02 )	18.02 ( 0 )	4.17 ( 1.29 )
Lacrimation Decreased	1	Inf ( NaN - Inf )	Inf ( 17.02 )	18.02 ( 0 )	4.17 ( 1.29 )
Vital Capacity Decreased	1	5.67 ( 0.59 - 54.55 )	5.67 ( 2.89 )	4.5 ( 0.68 )	2.17 ( -0.24 )
Chromaturia	1	1.55 ( 0.2 - 11.99 )	1.55 ( 0.18 )	1.5 ( 0.27 )	0.59 ( -1.61 )
Hypertrichosis	1	2.84 ( 0.34 - 23.57 )	2.84 ( 1.02 )	2.57 ( 0.44 )	1.36 ( -0.92 )
Photosensitivity Reaction	1	0.25 ( 0.03 - 1.8 )	0.25 ( 2.21 )	0.26 ( 0.05 )	-1.94 ( -4.01 )
Skin Ulcer	1	0.37 ( 0.05 - 2.68 )	0.37 ( 1.05 )	0.38 ( 0.07 )	-1.38 ( -3.47 )
Hypovitaminosis	1	5.67 ( 0.59 - 54.55 )	5.67 ( 2.89 )	4.5 ( 0.68 )	2.17 ( -0.24 )
B-Lymphocyte Count Decreased	1	1.7 ( 0.22 - 13.3 )	1.7 ( 0.26 )	1.64 ( 0.29 )	0.71 ( -1.49 )
Blood Immunoglobulin A Decreased	1	4.26 ( 0.48 - 38.08 )	4.25 ( 1.99 )	3.6 ( 0.58 )	1.85 ( -0.51 )
Blood Immunoglobulin M Decreased	1	2.84 ( 0.34 - 23.57 )	2.84 ( 1.02 )	2.57 ( 0.44 )	1.36 ( -0.92 )
Adenocarcinoma Pancreas	1	3.4 ( 0.4 - 29.14 )	3.4 ( 1.41 )	3 ( 0.5 )	1.59 ( -0.73 )
Drug Level Increased	1	0.06 ( 0.01 - 0.42 )	0.06 ( 14.78 )	0.06 ( 0.01 )	-3.99 ( -6.04 )
Neoplasm Malignant	1	0.08 ( 0.01 - 0.54 )	0.08 ( 11.26 )	0.08 ( 0.02 )	-3.65 ( -5.7 )
Small Cell Lung Cancer Limited Stage	1	Inf ( NaN - Inf )	Inf ( 17.02 )	18.02 ( 0 )	4.17 ( 1.29 )
Arterial Injury	1	4.26 ( 0.48 - 38.08 )	4.25 ( 1.99 )	3.6 ( 0.58 )	1.85 ( -0.51 )
Complications Of Transplanted Lung	1	0.55 ( 0.07 - 4.02 )	0.55 ( 0.36 )	0.56 ( 0.11 )	-0.83 ( -2.93 )
Intracranial Tumour Haemorrhage	1	2.43 ( 0.3 - 19.77 )	2.43 ( 0.74 )	2.25 ( 0.39 )	1.17 ( -1.08 )
Meningeal Neoplasm	1	2.84 ( 0.34 - 23.57 )	2.84 ( 1.02 )	2.57 ( 0.44 )	1.36 ( -0.92 )
Paraproteinaemia	1	17.02 ( 1.06 - 272.17 )	17.02 ( 7.54 )	9.01 ( 0.89 )	3.17 ( 0.54 )
Serous Retinal Detachment	1	Inf ( NaN - Inf )	Inf ( 17.02 )	18.02 ( 0 )	4.17 ( 1.29 )
Visual Acuity Reduced	1	0.29 ( 0.04 - 2.08 )	0.29 ( 1.73 )	0.3 ( 0.06 )	-1.74 ( -3.81 )
Cerebral Aspergillosis	1	0.35 ( 0.05 - 2.57 )	0.35 ( 1.15 )	0.37 ( 0.07 )	-1.44 ( -3.52 )
Antiphospholipid Antibodies	1	Inf ( NaN - Inf )	Inf ( 17.02 )	18.02 ( 0 )	4.17 ( 1.29 )
Arrhythmia Supraventricular	1	3.4 ( 0.4 - 29.14 )	3.4 ( 1.41 )	3 ( 0.5 )	1.59 ( -0.73 )
Cortical Dysplasia	1	Inf ( NaN - Inf )	Inf ( 17.02 )	18.02 ( 0 )	4.17 ( 1.29 )
Deafness Neurosensory	1	1.55 ( 0.2 - 11.99 )	1.55 ( 0.18 )	1.5 ( 0.27 )	0.59 ( -1.61 )
Muscle Contractions Involuntary	1	5.67 ( 0.59 - 54.55 )	5.67 ( 2.89 )	4.5 ( 0.68 )	2.17 ( -0.24 )
Myoclonic Epilepsy	1	4.26 ( 0.48 - 38.08 )	4.25 ( 1.99 )	3.6 ( 0.58 )	1.85 ( -0.51 )
Respiratory Tract Infection Fungal	1	0.5 ( 0.07 - 3.66 )	0.5 ( 0.48 )	0.51 ( 0.1 )	-0.96 ( -3.05 )
Fungal Rhinitis	1	17.02 ( 1.06 - 272.17 )	17.02 ( 7.54 )	9.01 ( 0.89 )	3.17 ( 0.54 )
Colon Neoplasm	1	8.51 ( 0.77 - 93.87 )	8.51 ( 4.42 )	6.01 ( 0.81 )	2.59 ( 0.09 )
Osteomyelitis	1	0.38 ( 0.05 - 2.74 )	0.38 ( 1 )	0.39 ( 0.07 )	-1.35 ( -3.44 )
Trichuriasis	1	Inf ( NaN - Inf )	Inf ( 17.02 )	18.02 ( 0 )	4.17 ( 1.29 )
Paternal Exposure Before Pregnancy	1	17.02 ( 1.06 - 272.17 )	17.02 ( 7.54 )	9.01 ( 0.89 )	3.17 ( 0.54 )
Menopause	1	Inf ( NaN - Inf )	Inf ( 17.02 )	18.02 ( 0 )	4.17 ( 1.29 )
Pharyngeal Lesion	1	Inf ( NaN - Inf )	Inf ( 17.02 )	18.02 ( 0 )	4.17 ( 1.29 )
Tracheal Stenosis	1	8.51 ( 0.77 - 93.87 )	8.51 ( 4.42 )	6.01 ( 0.81 )	2.59 ( 0.09 )
Bronchopulmonary Aspergillosis Allergic	1	17.02 ( 1.06 - 272.17 )	17.02 ( 7.54 )	9.01 ( 0.89 )	3.17 ( 0.54 )
Pulmonary Air Leakage	1	2.43 ( 0.3 - 19.77 )	2.43 ( 0.74 )	2.25 ( 0.39 )	1.17 ( -1.08 )
Acanthamoeba Infection	1	0.95 ( 0.13 - 7.08 )	0.95 ( 0 )	0.95 ( 0.18 )	-0.08 ( -2.22 )
Parasitic Encephalitis	1	8.51 ( 0.77 - 93.87 )	8.51 ( 4.42 )	6.01 ( 0.81 )	2.59 ( 0.09 )
Central Nervous System Infection	1	0.85 ( 0.11 - 6.34 )	0.85 ( 0.02 )	0.86 ( 0.16 )	-0.22 ( -2.35 )
Sinus Bradycardia	1	0.77 ( 0.1 - 5.74 )	0.77 ( 0.06 )	0.78 ( 0.15 )	-0.35 ( -2.48 )
Abscess	1	0.33 ( 0.05 - 2.41 )	0.33 ( 1.31 )	0.35 ( 0.07 )	-1.53 ( -3.61 )
Inflammatory Bowel Disease	1	0.61 ( 0.08 - 4.47 )	0.61 ( 0.24 )	0.62 ( 0.12 )	-0.69 ( -2.79 )
Bacillus Bacteraemia	1	17.02 ( 1.06 - 272.17 )	17.02 ( 7.54 )	9.01 ( 0.89 )	3.17 ( 0.54 )
Bacterial Colitis	1	3.4 ( 0.4 - 29.14 )	3.4 ( 1.41 )	3 ( 0.5 )	1.59 ( -0.73 )
Corynebacterium Infection	1	1.31 ( 0.17 - 10.01 )	1.31 ( 0.07 )	1.29 ( 0.23 )	0.36 ( -1.81 )
Nodule	1	1.13 ( 0.15 - 8.59 )	1.13 ( 0.01 )	1.13 ( 0.21 )	0.17 ( -1.99 )
Opportunistic Infection	1	0.55 ( 0.07 - 4.02 )	0.55 ( 0.36 )	0.56 ( 0.11 )	-0.83 ( -2.93 )
Allogenic Stem Cell Transplantation	1	1.89 ( 0.24 - 14.93 )	1.89 ( 0.38 )	1.8 ( 0.32 )	0.85 ( -1.37 )
Pulmonary Nocardiosis	1	0.59 ( 0.08 - 4.31 )	0.59 ( 0.28 )	0.6 ( 0.11 )	-0.74 ( -2.84 )
Papillary Thyroid Cancer	1	4.26 ( 0.48 - 38.08 )	4.25 ( 1.99 )	3.6 ( 0.58 )	1.85 ( -0.51 )
Intracranial Infection	1	1.55 ( 0.2 - 11.99 )	1.55 ( 0.18 )	1.5 ( 0.27 )	0.59 ( -1.61 )
Intracranial Mass	1	2.13 ( 0.27 - 17.01 )	2.13 ( 0.53 )	2 ( 0.35 )	1 ( -1.23 )
Cytomegalovirus Gastrointestinal Infection	1	0.52 ( 0.07 - 3.77 )	0.52 ( 0.44 )	0.53 ( 0.1 )	-0.92 ( -3.01 )
Mucosal Haemorrhage	1	1.7 ( 0.22 - 13.3 )	1.7 ( 0.26 )	1.64 ( 0.29 )	0.71 ( -1.49 )
Autonomic Neuropathy	1	17.02 ( 1.06 - 272.17 )	17.02 ( 7.54 )	9.01 ( 0.89 )	3.17 ( 0.54 )
Eosinophilic Pneumonia Acute	1	17.02 ( 1.06 - 272.17 )	17.02 ( 7.54 )	9.01 ( 0.89 )	3.17 ( 0.54 )
Actinomycosis	1	1.42 ( 0.18 - 10.91 )	1.42 ( 0.11 )	1.39 ( 0.25 )	0.47 ( -1.71 )
Graft Versus Host Disease In Eye	1	0.24 ( 0.03 - 1.73 )	0.24 ( 2.38 )	0.25 ( 0.05 )	-2 ( -4.07 )
Palatal Ulcer	1	3.4 ( 0.4 - 29.14 )	3.4 ( 1.41 )	3 ( 0.5 )	1.59 ( -0.73 )
Lung Neoplasm Malignant	1	0.33 ( 0.05 - 2.37 )	0.33 ( 1.36 )	0.34 ( 0.06 )	-1.56 ( -3.63 )
Protein Total Decreased	1	0.65 ( 0.09 - 4.82 )	0.65 ( 0.18 )	0.67 ( 0.13 )	-0.58 ( -2.7 )
Oesophageal Haemorrhage	1	Inf ( NaN - Inf )	Inf ( 17.02 )	18.02 ( 0 )	4.17 ( 1.29 )
Blood Chloride Increased	1	1.31 ( 0.17 - 10.01 )	1.31 ( 0.07 )	1.29 ( 0.23 )	0.36 ( -1.81 )
Blood Potassium Increased	1	0.29 ( 0.04 - 2.08 )	0.29 ( 1.73 )	0.3 ( 0.06 )	-1.74 ( -3.81 )
Blood Sodium Increased	1	2.43 ( 0.3 - 19.77 )	2.43 ( 0.74 )	2.25 ( 0.39 )	1.17 ( -1.08 )
Pseudomembranous Colitis	1	0.49 ( 0.07 - 3.55 )	0.49 ( 0.53 )	0.5 ( 0.09 )	-1 ( -3.09 )
Dyspnoea Exertional	1	0.22 ( 0.03 - 1.61 )	0.22 ( 2.66 )	0.23 ( 0.04 )	-2.1 ( -4.16 )
Tricuspid Valve Incompetence	1	1.06 ( 0.14 - 8.02 )	1.06 ( 0 )	1.06 ( 0.2 )	0.08 ( -2.07 )
Enamel Anomaly	1	8.51 ( 0.77 - 93.87 )	8.51 ( 4.42 )	6.01 ( 0.81 )	2.59 ( 0.09 )
Tooth Disorder	1	1.31 ( 0.17 - 10.01 )	1.31 ( 0.07 )	1.29 ( 0.23 )	0.36 ( -1.81 )
Legionella Infection	1	1 ( 0.13 - 7.52 )	1 ( 0 )	1 ( 0.19 )	0 ( -2.14 )
Haemorrhagic Stroke	1	0.77 ( 0.1 - 5.74 )	0.77 ( 0.06 )	0.78 ( 0.15 )	-0.35 ( -2.48 )
Adenoviral Encephalitis	1	Inf ( NaN - Inf )	Inf ( 17.02 )	18.02 ( 0 )	4.17 ( 1.29 )
Herpes Simplex Encephalitis	1	2.43 ( 0.3 - 19.77 )	2.43 ( 0.74 )	2.25 ( 0.39 )	1.17 ( -1.08 )
Eosinophilic Pneumonia	1	3.4 ( 0.4 - 29.14 )	3.4 ( 1.41 )	3 ( 0.5 )	1.59 ( -0.73 )
Pulmonary Pneumatocele	1	8.51 ( 0.77 - 93.87 )	8.51 ( 4.42 )	6.01 ( 0.81 )	2.59 ( 0.09 )
Accidental Death	1	17.02 ( 1.06 - 272.17 )	17.02 ( 7.54 )	9.01 ( 0.89 )	3.17 ( 0.54 )
Tumour Lysis Syndrome	1	0.5 ( 0.07 - 3.66 )	0.5 ( 0.48 )	0.51 ( 0.1 )	-0.96 ( -3.05 )
Tuberculous Pleurisy	1	8.51 ( 0.77 - 93.87 )	8.51 ( 4.42 )	6.01 ( 0.81 )	2.59 ( 0.09 )
Corynebacterium Bacteraemia	1	4.26 ( 0.48 - 38.08 )	4.25 ( 1.99 )	3.6 ( 0.58 )	1.85 ( -0.51 )
Arthritis Bacterial	1	0.77 ( 0.1 - 5.74 )	0.77 ( 0.06 )	0.78 ( 0.15 )	-0.35 ( -2.48 )
Hodgkin'S Disease	1	0.55 ( 0.07 - 4.02 )	0.55 ( 0.36 )	0.56 ( 0.11 )	-0.83 ( -2.93 )
Abdominal Discomfort	1	0.22 ( 0.03 - 1.59 )	0.22 ( 2.71 )	0.23 ( 0.04 )	-2.11 ( -4.18 )
Dermatitis Contact	1	3.4 ( 0.4 - 29.14 )	3.4 ( 1.41 )	3 ( 0.5 )	1.59 ( -0.73 )
Cerebellar Calcification	1	Inf ( NaN - Inf )	Inf ( 17.02 )	18.02 ( 0 )	4.17 ( 1.29 )
Osteosarcoma	1	1.55 ( 0.2 - 11.99 )	1.55 ( 0.18 )	1.5 ( 0.27 )	0.59 ( -1.61 )
Rhinocerebral Mucormycosis	1	4.26 ( 0.48 - 38.08 )	4.25 ( 1.99 )	3.6 ( 0.58 )	1.85 ( -0.51 )
Frequent Bowel Movements	1	1.42 ( 0.18 - 10.91 )	1.42 ( 0.11 )	1.39 ( 0.25 )	0.47 ( -1.71 )
Polyneuropathy Chronic	1	Inf ( NaN - Inf )	Inf ( 17.02 )	18.02 ( 0 )	4.17 ( 1.29 )
Enterobacter Pneumonia	1	2.43 ( 0.3 - 19.77 )	2.43 ( 0.74 )	2.25 ( 0.39 )	1.17 ( -1.08 )
Lymphocytosis	1	1.06 ( 0.14 - 8.02 )	1.06 ( 0 )	1.06 ( 0.2 )	0.08 ( -2.07 )
Myopathy	1	0.29 ( 0.04 - 2.08 )	0.29 ( 1.73 )	0.3 ( 0.06 )	-1.74 ( -3.81 )
Central Nervous System Vasculitis	1	1.42 ( 0.18 - 10.91 )	1.42 ( 0.11 )	1.39 ( 0.25 )	0.47 ( -1.71 )
Hepatorenal Failure	1	17.02 ( 1.06 - 272.17 )	17.02 ( 7.54 )	9.01 ( 0.89 )	3.17 ( 0.54 )
Bladder Cancer	1	1 ( 0.13 - 7.52 )	1 ( 0 )	1 ( 0.19 )	0 ( -2.14 )
Enterococcal Gastroenteritis	1	Inf ( NaN - Inf )	Inf ( 17.02 )	18.02 ( 0 )	4.17 ( 1.29 )
Polyarthritis	1	1.7 ( 0.22 - 13.3 )	1.7 ( 0.26 )	1.64 ( 0.29 )	0.71 ( -1.49 )
Hepatitis C Rna Increased	1	4.26 ( 0.48 - 38.08 )	4.25 ( 1.99 )	3.6 ( 0.58 )	1.85 ( -0.51 )
Hand Fracture	1	4.26 ( 0.48 - 38.08 )	4.25 ( 1.99 )	3.6 ( 0.58 )	1.85 ( -0.51 )
Heart Rate Increased	1	0.34 ( 0.05 - 2.46 )	0.34 ( 1.25 )	0.35 ( 0.07 )	-1.5 ( -3.58 )
Muscle Spasms	1	0.23 ( 0.03 - 1.68 )	0.23 ( 2.49 )	0.24 ( 0.05 )	-2.04 ( -4.11 )
Nystagmus	1	0.77 ( 0.1 - 5.74 )	0.77 ( 0.06 )	0.78 ( 0.15 )	-0.35 ( -2.48 )
Flushing	1	0.4 ( 0.05 - 2.87 )	0.4 ( 0.9 )	0.41 ( 0.08 )	-1.29 ( -3.37 )
Mucosal Ulceration	1	1.22 ( 0.16 - 9.25 )	1.22 ( 0.04 )	1.2 ( 0.22 )	0.26 ( -1.9 )
Pyloric Stenosis	1	Inf ( NaN - Inf )	Inf ( 17.02 )	18.02 ( 0 )	4.17 ( 1.29 )
Nasal Cavity Packing	1	Inf ( NaN - Inf )	Inf ( 17.02 )	18.02 ( 0 )	4.17 ( 1.29 )
Hypoacusis	1	1.06 ( 0.14 - 8.02 )	1.06 ( 0 )	1.06 ( 0.2 )	0.08 ( -2.07 )
Otitis Media	1	1 ( 0.13 - 7.52 )	1 ( 0 )	1 ( 0.19 )	0 ( -2.14 )
Myelofibrosis	1	1.13 ( 0.15 - 8.59 )	1.13 ( 0.01 )	1.13 ( 0.21 )	0.17 ( -1.99 )
Biliary Tract Infection Bacterial	1	8.51 ( 0.77 - 93.87 )	8.51 ( 4.42 )	6.01 ( 0.81 )	2.59 ( 0.09 )
Infective Exacerbation Of Bronchiectasis	1	5.67 ( 0.59 - 54.55 )	5.67 ( 2.89 )	4.5 ( 0.68 )	2.17 ( -0.24 )
Pneumonia Pseudomonal	1	0.38 ( 0.05 - 2.74 )	0.38 ( 1 )	0.39 ( 0.07 )	-1.35 ( -3.44 )
Ewing-Like Sarcoma	1	Inf ( NaN - Inf )	Inf ( 17.02 )	18.02 ( 0 )	4.17 ( 1.29 )
Metastases To Lung	1	0.31 ( 0.04 - 2.24 )	0.31 ( 1.51 )	0.32 ( 0.06 )	-1.64 ( -3.71 )
Cholelithiasis	1	0.4 ( 0.05 - 2.87 )	0.4 ( 0.9 )	0.41 ( 0.08 )	-1.29 ( -3.37 )
5'Nucleotidase Increased	1	2.84 ( 0.34 - 23.57 )	2.84 ( 1.02 )	2.57 ( 0.44 )	1.36 ( -0.92 )
Anti-Platelet Antibody Positive	1	2.43 ( 0.3 - 19.77 )	2.43 ( 0.74 )	2.25 ( 0.39 )	1.17 ( -1.08 )
Blood Bilirubin Unconjugated Increased	1	1.42 ( 0.18 - 10.91 )	1.42 ( 0.11 )	1.39 ( 0.25 )	0.47 ( -1.71 )
Coombs Direct Test Positive	1	1.31 ( 0.17 - 10.01 )	1.31 ( 0.07 )	1.29 ( 0.23 )	0.36 ( -1.81 )
Embolism Venous	1	2.13 ( 0.27 - 17.01 )	2.13 ( 0.53 )	2 ( 0.35 )	1 ( -1.23 )
Urine Analysis Abnormal	1	1.55 ( 0.2 - 11.99 )	1.55 ( 0.18 )	1.5 ( 0.27 )	0.59 ( -1.61 )
Withdrawal Syndrome	1	0.85 ( 0.11 - 6.34 )	0.85 ( 0.02 )	0.86 ( 0.16 )	-0.22 ( -2.35 )
Peripheral T-Cell Lymphoma Unspecified	1	1.7 ( 0.22 - 13.3 )	1.7 ( 0.26 )	1.64 ( 0.29 )	0.71 ( -1.49 )
Bowen'S Disease	1	0.81 ( 0.11 - 6.03 )	0.81 ( 0.04 )	0.82 ( 0.15 )	-0.29 ( -2.42 )
Device Related Sepsis	1	0.63 ( 0.09 - 4.64 )	0.63 ( 0.21 )	0.64 ( 0.12 )	-0.64 ( -2.75 )
Dysmetria	1	4.26 ( 0.48 - 38.08 )	4.25 ( 1.99 )	3.6 ( 0.58 )	1.85 ( -0.51 )
Early Satiety	1	8.51 ( 0.77 - 93.87 )	8.51 ( 4.42 )	6.01 ( 0.81 )	2.59 ( 0.09 )
Mania	1	1.89 ( 0.24 - 14.93 )	1.89 ( 0.38 )	1.8 ( 0.32 )	0.85 ( -1.37 )
Tooth Abscess	1	2.43 ( 0.3 - 19.77 )	2.43 ( 0.74 )	2.25 ( 0.39 )	1.17 ( -1.08 )
Malignant Melanoma	1	0.3 ( 0.04 - 2.2 )	0.3 ( 1.57 )	0.32 ( 0.06 )	-1.66 ( -3.74 )
Cardiorenal Syndrome	1	1.06 ( 0.14 - 8.02 )	1.06 ( 0 )	1.06 ( 0.2 )	0.08 ( -2.07 )
Investigation	1	Inf ( NaN - Inf )	Inf ( 17.02 )	18.02 ( 0 )	4.17 ( 1.29 )
Product Preparation Error	1	8.51 ( 0.77 - 93.87 )	8.51 ( 4.42 )	6.01 ( 0.81 )	2.59 ( 0.09 )
Acute Lung Injury	1	1.7 ( 0.22 - 13.3 )	1.7 ( 0.26 )	1.64 ( 0.29 )	0.71 ( -1.49 )
Multi-Organ Disorder	1	0.95 ( 0.13 - 7.08 )	0.95 ( 0 )	0.95 ( 0.18 )	-0.08 ( -2.22 )
Prostate Cancer	1	0.55 ( 0.07 - 4.02 )	0.55 ( 0.36 )	0.56 ( 0.11 )	-0.83 ( -2.93 )
Squamous Cell Carcinoma Of Skin	1	0.1 ( 0.01 - 0.75 )	0.11 ( 7.58 )	0.11 ( 0.02 )	-3.18 ( -5.23 )
Penile Squamous Cell Carcinoma	1	17.02 ( 1.06 - 272.17 )	17.02 ( 7.54 )	9.01 ( 0.89 )	3.17 ( 0.54 )
Central Nervous System Lesion	1	0.41 ( 0.06 - 2.94 )	0.41 ( 0.85 )	0.42 ( 0.08 )	-1.25 ( -3.34 )
Systemic Infection	1	2.84 ( 0.34 - 23.57 )	2.84 ( 1.02 )	2.57 ( 0.44 )	1.36 ( -0.92 )
Electrocardiogram T Wave Inversion	1	17.02 ( 1.06 - 272.17 )	17.02 ( 7.54 )	9.01 ( 0.89 )	3.17 ( 0.54 )
Dry Skin	1	0.46 ( 0.06 - 3.35 )	0.46 ( 0.62 )	0.47 ( 0.09 )	-1.08 ( -3.17 )
Hypomagnesaemia	1	0.19 ( 0.03 - 1.36 )	0.19 ( 3.44 )	0.2 ( 0.04 )	-2.34 ( -4.4 )
Salivary Gland Cancer	1	8.51 ( 0.77 - 93.87 )	8.51 ( 4.42 )	6.01 ( 0.81 )	2.59 ( 0.09 )
Vitreous Haemorrhage	1	5.67 ( 0.59 - 54.55 )	5.67 ( 2.89 )	4.5 ( 0.68 )	2.17 ( -0.24 )
Injection Site Reaction	1	4.26 ( 0.48 - 38.08 )	4.25 ( 1.99 )	3.6 ( 0.58 )	1.85 ( -0.51 )
Epstein-Barr Virus Associated Lymphoma	1	0.4 ( 0.05 - 2.87 )	0.4 ( 0.9 )	0.41 ( 0.08 )	-1.29 ( -3.37 )
Right Ventricular Systolic Pressure Increased	1	Inf ( NaN - Inf )	Inf ( 17.02 )	18.02 ( 0 )	4.17 ( 1.29 )
Eosinophilia	1	0.44 ( 0.06 - 3.18 )	0.44 ( 0.71 )	0.45 ( 0.09 )	-1.15 ( -3.24 )
Cerebrovascular Accident	1	0.19 ( 0.03 - 1.34 )	0.19 ( 3.5 )	0.2 ( 0.04 )	-2.35 ( -4.41 )
Disseminated Cryptococcosis	1	0.47 ( 0.06 - 3.45 )	0.47 ( 0.57 )	0.49 ( 0.09 )	-1.04 ( -3.13 )
Genital Ulceration	1	3.4 ( 0.4 - 29.14 )	3.4 ( 1.41 )	3 ( 0.5 )	1.59 ( -0.73 )
Genitourinary Symptom	1	17.02 ( 1.06 - 272.17 )	17.02 ( 7.54 )	9.01 ( 0.89 )	3.17 ( 0.54 )
Polycythaemia	1	1 ( 0.13 - 7.52 )	1 ( 0 )	1 ( 0.19 )	0 ( -2.14 )
Growth Disorder	1	Inf ( NaN - Inf )	Inf ( 17.02 )	18.02 ( 0 )	4.17 ( 1.29 )
Clavicle Fracture	1	8.51 ( 0.77 - 93.87 )	8.51 ( 4.42 )	6.01 ( 0.81 )	2.59 ( 0.09 )
Femur Fracture	1	1 ( 0.13 - 7.52 )	1 ( 0 )	1 ( 0.19 )	0 ( -2.14 )
Fibula Fracture	1	Inf ( NaN - Inf )	Inf ( 17.02 )	18.02 ( 0 )	4.17 ( 1.29 )
Foot Fracture	1	2.84 ( 0.34 - 23.57 )	2.84 ( 1.02 )	2.57 ( 0.44 )	1.36 ( -0.92 )
Humerus Fracture	1	3.4 ( 0.4 - 29.14 )	3.4 ( 1.41 )	3 ( 0.5 )	1.59 ( -0.73 )
Pathological Fracture	1	3.4 ( 0.4 - 29.14 )	3.4 ( 1.41 )	3 ( 0.5 )	1.59 ( -0.73 )
Tibia Fracture	1	8.51 ( 0.77 - 93.87 )	8.51 ( 4.42 )	6.01 ( 0.81 )	2.59 ( 0.09 )
Gastrooesophageal Reflux Disease	1	0.33 ( 0.05 - 2.37 )	0.33 ( 1.36 )	0.34 ( 0.06 )	-1.56 ( -3.63 )
Wound Infection Staphylococcal	1	1.42 ( 0.18 - 10.91 )	1.42 ( 0.11 )	1.39 ( 0.25 )	0.47 ( -1.71 )
Bacillus Infection	1	1.89 ( 0.24 - 14.93 )	1.89 ( 0.38 )	1.8 ( 0.32 )	0.85 ( -1.37 )
Haematocrit Decreased	1	0.23 ( 0.03 - 1.63 )	0.23 ( 2.6 )	0.24 ( 0.05 )	-2.08 ( -4.14 )
Hypophagia	1	0.44 ( 0.06 - 3.18 )	0.44 ( 0.71 )	0.45 ( 0.09 )	-1.15 ( -3.24 )
Lung Neoplasm	1	0.65 ( 0.09 - 4.82 )	0.65 ( 0.18 )	0.67 ( 0.13 )	-0.58 ( -2.7 )
Paresis	1	2.13 ( 0.27 - 17.01 )	2.13 ( 0.53 )	2 ( 0.35 )	1 ( -1.23 )
Parasitic Pneumonia	1	17.02 ( 1.06 - 272.17 )	17.02 ( 7.54 )	9.01 ( 0.89 )	3.17 ( 0.54 )
Toxocariasis	1	Inf ( NaN - Inf )	Inf ( 17.02 )	18.02 ( 0 )	4.17 ( 1.29 )
Therapeutic Product Effect Incomplete	1	0.27 ( 0.04 - 1.92 )	0.27 ( 2 )	0.28 ( 0.05 )	-1.85 ( -3.92 )
Epidermal Necrosis	1	4.26 ( 0.48 - 38.08 )	4.25 ( 1.99 )	3.6 ( 0.58 )	1.85 ( -0.51 )
Rash Erythematous	1	0.32 ( 0.04 - 2.28 )	0.32 ( 1.46 )	0.33 ( 0.06 )	-1.61 ( -3.69 )
Hypoglycaemia	1	0.33 ( 0.05 - 2.37 )	0.33 ( 1.36 )	0.34 ( 0.06 )	-1.56 ( -3.63 )
Cranial Nerve Disorder	1	2.13 ( 0.27 - 17.01 )	2.13 ( 0.53 )	2 ( 0.35 )	1 ( -1.23 )
Superinfection Bacterial	1	0.59 ( 0.08 - 4.31 )	0.59 ( 0.28 )	0.6 ( 0.11 )	-0.74 ( -2.84 )
Infective Thrombosis	1	Inf ( NaN - Inf )	Inf ( 17.02 )	18.02 ( 0 )	4.17 ( 1.29 )
Urinary Bladder Haemorrhage	1	2.43 ( 0.3 - 19.77 )	2.43 ( 0.74 )	2.25 ( 0.39 )	1.17 ( -1.08 )
Chylothorax	1	3.4 ( 0.4 - 29.14 )	3.4 ( 1.41 )	3 ( 0.5 )	1.59 ( -0.73 )
Visual Impairment	1	0.15 ( 0.02 - 1.08 )	0.15 ( 4.75 )	0.16 ( 0.03 )	-2.66 ( -4.72 )
Hydrocephalus	1	0.41 ( 0.06 - 2.94 )	0.41 ( 0.85 )	0.42 ( 0.08 )	-1.25 ( -3.34 )
Epstein-Barr Virus Test Positive	1	0.46 ( 0.06 - 3.35 )	0.46 ( 0.62 )	0.47 ( 0.09 )	-1.08 ( -3.17 )
Haemorrhoidal Haemorrhage	1	3.4 ( 0.4 - 29.14 )	3.4 ( 1.41 )	3 ( 0.5 )	1.59 ( -0.73 )
Postrenal Failure	1	1.7 ( 0.22 - 13.3 )	1.7 ( 0.26 )	1.64 ( 0.29 )	0.71 ( -1.49 )
Transitional Cell Carcinoma	1	0.53 ( 0.07 - 3.89 )	0.53 ( 0.4 )	0.55 ( 0.1 )	-0.87 ( -2.97 )
Anti-Thyroid Antibody	1	17.02 ( 1.06 - 272.17 )	17.02 ( 7.54 )	9.01 ( 0.89 )	3.17 ( 0.54 )
Primary Hypothyroidism	1	17.02 ( 1.06 - 272.17 )	17.02 ( 7.54 )	9.01 ( 0.89 )	3.17 ( 0.54 )
Thyroid Mass	1	Inf ( NaN - Inf )	Inf ( 17.02 )	18.02 ( 0 )	4.17 ( 1.29 )
Face Oedema	1	0.47 ( 0.06 - 3.45 )	0.47 ( 0.57 )	0.49 ( 0.09 )	-1.04 ( -3.13 )
Acute Lymphocytic Leukaemia Refractory	1	17.02 ( 1.06 - 272.17 )	17.02 ( 7.54 )	9.01 ( 0.89 )	3.17 ( 0.54 )
Bone Marrow Disorder	1	1.13 ( 0.15 - 8.59 )	1.13 ( 0.01 )	1.13 ( 0.21 )	0.17 ( -1.99 )
Emphysematous Cystitis	1	3.4 ( 0.4 - 29.14 )	3.4 ( 1.41 )	3 ( 0.5 )	1.59 ( -0.73 )
Synovitis	1	2.43 ( 0.3 - 19.77 )	2.43 ( 0.74 )	2.25 ( 0.39 )	1.17 ( -1.08 )
Mesenteric Panniculitis	1	Inf ( NaN - Inf )	Inf ( 17.02 )	18.02 ( 0 )	4.17 ( 1.29 )
Thrombophlebitis	1	3.4 ( 0.4 - 29.14 )	3.4 ( 1.41 )	3 ( 0.5 )	1.59 ( -0.73 )
Hyperphosphataemia	1	1.22 ( 0.16 - 9.25 )	1.22 ( 0.04 )	1.2 ( 0.22 )	0.26 ( -1.9 )
Visceral Venous Thrombosis	1	Inf ( NaN - Inf )	Inf ( 17.02 )	18.02 ( 0 )	4.17 ( 1.29 )
Cryptococcosis	1	0.35 ( 0.05 - 2.52 )	0.35 ( 1.2 )	0.36 ( 0.07 )	-1.47 ( -3.55 )
Encephalitis Fungal	1	1.42 ( 0.18 - 10.91 )	1.42 ( 0.11 )	1.39 ( 0.25 )	0.47 ( -1.71 )
Anogenital Warts	1	2.43 ( 0.3 - 19.77 )	2.43 ( 0.74 )	2.25 ( 0.39 )	1.17 ( -1.08 )
Varicella	1	0.43 ( 0.06 - 3.1 )	0.43 ( 0.76 )	0.44 ( 0.08 )	-1.19 ( -3.27 )
Necrosis	1	0.53 ( 0.07 - 3.89 )	0.53 ( 0.4 )	0.55 ( 0.1 )	-0.87 ( -2.97 )
Portal Fibrosis	1	5.67 ( 0.59 - 54.55 )	5.67 ( 2.89 )	4.5 ( 0.68 )	2.17 ( -0.24 )
Pulmonary Valve Incompetence	1	8.51 ( 0.77 - 93.87 )	8.51 ( 4.42 )	6.01 ( 0.81 )	2.59 ( 0.09 )
Central Nervous System Leukaemia	1	8.51 ( 0.77 - 93.87 )	8.51 ( 4.42 )	6.01 ( 0.81 )	2.59 ( 0.09 )
Cushing'S Syndrome	1	1.13 ( 0.15 - 8.59 )	1.13 ( 0.01 )	1.13 ( 0.21 )	0.17 ( -1.99 )
Multiple-Drug Resistance	1	1 ( 0.13 - 7.52 )	1 ( 0 )	1 ( 0.19 )	0 ( -2.14 )
Refractoriness To Platelet Transfusion	1	1.89 ( 0.24 - 14.93 )	1.89 ( 0.38 )	1.8 ( 0.32 )	0.85 ( -1.37 )
Febrile Convulsion	1	17.02 ( 1.06 - 272.17 )	17.02 ( 7.54 )	9.01 ( 0.89 )	3.17 ( 0.54 )
Croup Infectious	1	17.02 ( 1.06 - 272.17 )	17.02 ( 7.54 )	9.01 ( 0.89 )	3.17 ( 0.54 )
Faeces Pale	1	8.51 ( 0.77 - 93.87 )	8.51 ( 4.42 )	6.01 ( 0.81 )	2.59 ( 0.09 )
Bowel Movement Irregularity	1	17.02 ( 1.06 - 272.17 )	17.02 ( 7.54 )	9.01 ( 0.89 )	3.17 ( 0.54 )
Splenic Abscess	1	2.43 ( 0.3 - 19.77 )	2.43 ( 0.74 )	2.25 ( 0.39 )	1.17 ( -1.08 )
Papilloma	1	1.89 ( 0.24 - 14.93 )	1.89 ( 0.38 )	1.8 ( 0.32 )	0.85 ( -1.37 )
Menopausal Symptoms	1	5.67 ( 0.59 - 54.55 )	5.67 ( 2.89 )	4.5 ( 0.68 )	2.17 ( -0.24 )
Appendicolith	1	5.67 ( 0.59 - 54.55 )	5.67 ( 2.89 )	4.5 ( 0.68 )	2.17 ( -0.24 )
Serum Sickness	1	0.25 ( 0.03 - 1.8 )	0.25 ( 2.21 )	0.26 ( 0.05 )	-1.94 ( -4.01 )
Appendiceal Abscess	1	4.26 ( 0.48 - 38.08 )	4.25 ( 1.99 )	3.6 ( 0.58 )	1.85 ( -0.51 )
Oesophageal Carcinoma Recurrent	1	Inf ( NaN - Inf )	Inf ( 17.02 )	18.02 ( 0 )	4.17 ( 1.29 )
Haemoglobinuria	1	2.43 ( 0.3 - 19.77 )	2.43 ( 0.74 )	2.25 ( 0.39 )	1.17 ( -1.08 )
Primary Adrenal Insufficiency	1	8.51 ( 0.77 - 93.87 )	8.51 ( 4.42 )	6.01 ( 0.81 )	2.59 ( 0.09 )
Parainfluenzae Viral Bronchitis	1	3.4 ( 0.4 - 29.14 )	3.4 ( 1.41 )	3 ( 0.5 )	1.59 ( -0.73 )
Hepatic Cancer	1	1.7 ( 0.22 - 13.3 )	1.7 ( 0.26 )	1.64 ( 0.29 )	0.71 ( -1.49 )
Dermatomyositis	1	17.02 ( 1.06 - 272.17 )	17.02 ( 7.54 )	9.01 ( 0.89 )	3.17 ( 0.54 )
Haematoma	1	0.22 ( 0.03 - 1.59 )	0.22 ( 2.71 )	0.23 ( 0.04 )	-2.11 ( -4.18 )
Brain Stem Infarction	1	5.67 ( 0.59 - 54.55 )	5.67 ( 2.89 )	4.5 ( 0.68 )	2.17 ( -0.24 )
Infective Aneurysm	1	2.13 ( 0.27 - 17.01 )	2.13 ( 0.53 )	2 ( 0.35 )	1 ( -1.23 )
Cellulitis Orbital	1	8.51 ( 0.77 - 93.87 )	8.51 ( 4.42 )	6.01 ( 0.81 )	2.59 ( 0.09 )
Optic Neuritis	1	1.89 ( 0.24 - 14.93 )	1.89 ( 0.38 )	1.8 ( 0.32 )	0.85 ( -1.37 )
Aneurysm Ruptured	1	Inf ( NaN - Inf )	Inf ( 17.02 )	18.02 ( 0 )	4.17 ( 1.29 )
Chloroma	1	1.55 ( 0.2 - 11.99 )	1.55 ( 0.18 )	1.5 ( 0.27 )	0.59 ( -1.61 )
Neurogenic Tumour	1	Inf ( NaN - Inf )	Inf ( 17.02 )	18.02 ( 0 )	4.17 ( 1.29 )
Trigeminal Nerve Disorder	1	8.51 ( 0.77 - 93.87 )	8.51 ( 4.42 )	6.01 ( 0.81 )	2.59 ( 0.09 )
Leukoencephalopathy	1	0.16 ( 0.02 - 1.15 )	0.16 ( 4.35 )	0.17 ( 0.03 )	-2.57 ( -4.63 )
Colon Cancer	1	0.68 ( 0.09 - 5.02 )	0.68 ( 0.14 )	0.69 ( 0.13 )	-0.53 ( -2.64 )
Therapy Non-Responder	1	0.08 ( 0.01 - 0.55 )	0.08 ( 11.03 )	0.08 ( 0.02 )	-3.62 ( -5.67 )
Nutritional Supplementation	1	Inf ( NaN - Inf )	Inf ( 17.02 )	18.02 ( 0 )	4.17 ( 1.29 )
Cytomegalovirus Syndrome	1	0.52 ( 0.07 - 3.77 )	0.52 ( 0.44 )	0.53 ( 0.1 )	-0.92 ( -3.01 )
Adrenal Insufficiency	1	0.36 ( 0.05 - 2.62 )	0.36 ( 1.1 )	0.38 ( 0.07 )	-1.41 ( -3.5 )
Hypoaesthesia	1	0.21 ( 0.03 - 1.53 )	0.21 ( 2.88 )	0.22 ( 0.04 )	-2.17 ( -4.23 )
Extensor Plantar Response	1	1.22 ( 0.16 - 9.25 )	1.22 ( 0.04 )	1.2 ( 0.22 )	0.26 ( -1.9 )
Pneumomediastinum	1	0.42 ( 0.06 - 3.02 )	0.42 ( 0.8 )	0.43 ( 0.08 )	-1.22 ( -3.31 )
Cytomegalovirus Gastritis	1	0.53 ( 0.07 - 3.89 )	0.53 ( 0.4 )	0.55 ( 0.1 )	-0.87 ( -2.97 )
Respiratory Acidosis	1	1.13 ( 0.15 - 8.59 )	1.13 ( 0.01 )	1.13 ( 0.21 )	0.17 ( -1.99 )
Hepatosplenomegaly	1	0.32 ( 0.04 - 2.32 )	0.32 ( 1.41 )	0.33 ( 0.06 )	-1.58 ( -3.66 )
Renal Tubular Acidosis	1	0.43 ( 0.06 - 3.1 )	0.43 ( 0.76 )	0.44 ( 0.08 )	-1.19 ( -3.27 )
Device Related Thrombosis	1	8.51 ( 0.77 - 93.87 )	8.51 ( 4.42 )	6.01 ( 0.81 )	2.59 ( 0.09 )
Oesophageal Ulcer	1	0.85 ( 0.11 - 6.34 )	0.85 ( 0.02 )	0.86 ( 0.16 )	-0.22 ( -2.35 )
Oesophageal Stenosis	1	0.71 ( 0.1 - 5.24 )	0.71 ( 0.11 )	0.72 ( 0.14 )	-0.47 ( -2.59 )
Oesophageal Mucosal Tear	1	Inf ( NaN - Inf )	Inf ( 17.02 )	18.02 ( 0 )	4.17 ( 1.29 )
Mycobacterium Avium Complex Infection	1	0.44 ( 0.06 - 3.18 )	0.44 ( 0.71 )	0.45 ( 0.09 )	-1.15 ( -3.24 )
Pulmonary Function Test Abnormal	1	3.4 ( 0.4 - 29.14 )	3.4 ( 1.41 )	3 ( 0.5 )	1.59 ( -0.73 )
Leukopenia	1	0.03 ( 0 - 0.19 )	0.03 ( 34.76 )	0.03 ( 0.01 )	-5.12 ( -7.16 )
Cerebrospinal Fluid Leakage	1	Inf ( NaN - Inf )	Inf ( 17.02 )	18.02 ( 0 )	4.17 ( 1.29 )
Encephalocele	1	8.51 ( 0.77 - 93.87 )	8.51 ( 4.42 )	6.01 ( 0.81 )	2.59 ( 0.09 )
Immune-Mediated Cytopenia	1	5.67 ( 0.59 - 54.55 )	5.67 ( 2.89 )	4.5 ( 0.68 )	2.17 ( -0.24 )
Oliguria	1	0.25 ( 0.03 - 1.8 )	0.25 ( 2.21 )	0.26 ( 0.05 )	-1.94 ( -4.01 )
Pneumonia Acinetobacter	1	2.43 ( 0.3 - 19.77 )	2.43 ( 0.74 )	2.25 ( 0.39 )	1.17 ( -1.08 )
Alveolar Lung Disease	1	Inf ( NaN - Inf )	Inf ( 17.02 )	18.02 ( 0 )	4.17 ( 1.29 )
Haemorrhage Subcutaneous	1	3.4 ( 0.4 - 29.14 )	3.4 ( 1.41 )	3 ( 0.5 )	1.59 ( -0.73 )
Hypopyon	1	17.02 ( 1.06 - 272.17 )	17.02 ( 7.54 )	9.01 ( 0.89 )	3.17 ( 0.54 )
Angioimmunoblastic T-Cell Lymphoma Recurrent	1	Inf ( NaN - Inf )	Inf ( 17.02 )	18.02 ( 0 )	4.17 ( 1.29 )
Metabolic Encephalopathy	1	0.68 ( 0.09 - 5.02 )	0.68 ( 0.14 )	0.69 ( 0.13 )	-0.53 ( -2.64 )
Azotaemia	1	0.59 ( 0.08 - 4.31 )	0.59 ( 0.28 )	0.6 ( 0.11 )	-0.74 ( -2.84 )
Kidney Small	1	17.02 ( 1.06 - 272.17 )	17.02 ( 7.54 )	9.01 ( 0.89 )	3.17 ( 0.54 )
Immune-Mediated Lung Disease	1	Inf ( NaN - Inf )	Inf ( 17.02 )	18.02 ( 0 )	4.17 ( 1.29 )
Leuconostoc Infection	1	17.02 ( 1.06 - 272.17 )	17.02 ( 7.54 )	9.01 ( 0.89 )	3.17 ( 0.54 )
Histoplasmosis	1	0.95 ( 0.13 - 7.08 )	0.95 ( 0 )	0.95 ( 0.18 )	-0.08 ( -2.22 )
Cholangitis	1	0.22 ( 0.03 - 1.61 )	0.22 ( 2.66 )	0.23 ( 0.04 )	-2.1 ( -4.16 )
Hippocampal Sclerosis	1	2.84 ( 0.34 - 23.57 )	2.84 ( 1.02 )	2.57 ( 0.44 )	1.36 ( -0.92 )
Central Hypothyroidism	1	4.26 ( 0.48 - 38.08 )	4.25 ( 1.99 )	3.6 ( 0.58 )	1.85 ( -0.51 )
Blood Beta-D-Glucan Increased	1	1.89 ( 0.24 - 14.93 )	1.89 ( 0.38 )	1.8 ( 0.32 )	0.85 ( -1.37 )
Abscess Fungal	1	5.67 ( 0.59 - 54.55 )	5.67 ( 2.89 )	4.5 ( 0.68 )	2.17 ( -0.24 )
Parvovirus Infection	1	0.74 ( 0.1 - 5.48 )	0.74 ( 0.09 )	0.75 ( 0.14 )	-0.41 ( -2.53 )
Nutritional Condition Abnormal	1	17.02 ( 1.06 - 272.17 )	17.02 ( 7.54 )	9.01 ( 0.89 )	3.17 ( 0.54 )
Gastroenteritis Clostridial	1	1.7 ( 0.22 - 13.3 )	1.7 ( 0.26 )	1.64 ( 0.29 )	0.71 ( -1.49 )
Device Related Bacteraemia	1	4.26 ( 0.48 - 38.08 )	4.25 ( 1.99 )	3.6 ( 0.58 )	1.85 ( -0.51 )
Hepatitis E	1	0.24 ( 0.03 - 1.7 )	0.24 ( 2.43 )	0.25 ( 0.05 )	-2.02 ( -4.09 )
Varicella Virus Test Positive	1	2.84 ( 0.34 - 23.57 )	2.84 ( 1.02 )	2.57 ( 0.44 )	1.36 ( -0.92 )
Superinfection	1	0.49 ( 0.07 - 3.55 )	0.49 ( 0.53 )	0.5 ( 0.09 )	-1 ( -3.09 )
Ventricular Tachycardia	1	0.45 ( 0.06 - 3.26 )	0.45 ( 0.66 )	0.46 ( 0.09 )	-1.11 ( -3.2 )
Pericarditis Fungal	1	2.13 ( 0.27 - 17.01 )	2.13 ( 0.53 )	2 ( 0.35 )	1 ( -1.23 )
Cardiac Hypertrophy	1	2.84 ( 0.34 - 23.57 )	2.84 ( 1.02 )	2.57 ( 0.44 )	1.36 ( -0.92 )
Ventricular Hypokinesia	1	0.85 ( 0.11 - 6.34 )	0.85 ( 0.02 )	0.86 ( 0.16 )	-0.22 ( -2.35 )
Treatment Noncompliance	1	0.23 ( 0.03 - 1.65 )	0.23 ( 2.54 )	0.24 ( 0.05 )	-2.06 ( -4.12 )
Bladder Transitional Cell Carcinoma	1	1.89 ( 0.24 - 14.93 )	1.89 ( 0.38 )	1.8 ( 0.32 )	0.85 ( -1.37 )
Dysarthria	1	0.31 ( 0.04 - 2.24 )	0.31 ( 1.51 )	0.32 ( 0.06 )	-1.64 ( -3.71 )
Pulmonary Artery Thrombosis	1	2.84 ( 0.34 - 23.57 )	2.84 ( 1.02 )	2.57 ( 0.44 )	1.36 ( -0.92 )
Hyperhomocysteinaemia	1	17.02 ( 1.06 - 272.17 )	17.02 ( 7.54 )	9.01 ( 0.89 )	3.17 ( 0.54 )
Mesenteric Artery Thrombosis	1	17.02 ( 1.06 - 272.17 )	17.02 ( 7.54 )	9.01 ( 0.89 )	3.17 ( 0.54 )
Blood Folate Decreased	1	Inf ( NaN - Inf )	Inf ( 17.02 )	18.02 ( 0 )	4.17 ( 1.29 )
Truncus Coeliacus Thrombosis	1	Inf ( NaN - Inf )	Inf ( 17.02 )	18.02 ( 0 )	4.17 ( 1.29 )
Aortic Thrombosis	1	8.51 ( 0.77 - 93.87 )	8.51 ( 4.42 )	6.01 ( 0.81 )	2.59 ( 0.09 )
Graft Versus Host Disease In Lung	1	0.17 ( 0.02 - 1.18 )	0.17 ( 4.18 )	0.17 ( 0.03 )	-2.53 ( -4.59 )
Conjunctivitis	1	0.39 ( 0.05 - 2.81 )	0.39 ( 0.95 )	0.4 ( 0.08 )	-1.32 ( -3.4 )
Photophobia	1	0.65 ( 0.09 - 4.82 )	0.65 ( 0.18 )	0.67 ( 0.13 )	-0.58 ( -2.7 )
Exercise Tolerance Decreased	1	8.51 ( 0.77 - 93.87 )	8.51 ( 4.42 )	6.01 ( 0.81 )	2.59 ( 0.09 )
Drug Level Below Therapeutic	1	0.65 ( 0.09 - 4.82 )	0.65 ( 0.18 )	0.67 ( 0.13 )	-0.58 ( -2.7 )
Expired Product Administered	1	5.67 ( 0.59 - 54.55 )	5.67 ( 2.89 )	4.5 ( 0.68 )	2.17 ( -0.24 )
Product Dispensing Error	1	1.7 ( 0.22 - 13.3 )	1.7 ( 0.26 )	1.64 ( 0.29 )	0.71 ( -1.49 )
Meningitis Bacterial	1	1.7 ( 0.22 - 13.3 )	1.7 ( 0.26 )	1.64 ( 0.29 )	0.71 ( -1.49 )
Parvovirus B19 Infection Reactivation	1	17.02 ( 1.06 - 272.17 )	17.02 ( 7.54 )	9.01 ( 0.89 )	3.17 ( 0.54 )
Reticulocytopenia	1	1.22 ( 0.16 - 9.25 )	1.22 ( 0.04 )	1.2 ( 0.22 )	0.26 ( -1.9 )
Pfapa Syndrome	1	17.02 ( 1.06 - 272.17 )	17.02 ( 7.54 )	9.01 ( 0.89 )	3.17 ( 0.54 )
Visceral Leishmaniasis	1	1.55 ( 0.2 - 11.99 )	1.55 ( 0.18 )	1.5 ( 0.27 )	0.59 ( -1.61 )
Intestinal Perforation	1	0.43 ( 0.06 - 3.1 )	0.43 ( 0.76 )	0.44 ( 0.08 )	-1.19 ( -3.27 )
Serum Ferritin Increased	1	0.4 ( 0.05 - 2.87 )	0.4 ( 0.9 )	0.41 ( 0.08 )	-1.29 ( -3.37 )
Prerenal Failure	1	1.7 ( 0.22 - 13.3 )	1.7 ( 0.26 )	1.64 ( 0.29 )	0.71 ( -1.49 )
Immune Recovery Uveitis	1	17.02 ( 1.06 - 272.17 )	17.02 ( 7.54 )	9.01 ( 0.89 )	3.17 ( 0.54 )
Adult T-Cell Lymphoma/Leukaemia Recurrent	1	2.84 ( 0.34 - 23.57 )	2.84 ( 1.02 )	2.57 ( 0.44 )	1.36 ( -0.92 )
Pharyngeal Inflammation	1	0.9 ( 0.12 - 6.69 )	0.9 ( 0.01 )	0.9 ( 0.17 )	-0.15 ( -2.29 )
Haematological Malignancy	1	0.68 ( 0.09 - 5.02 )	0.68 ( 0.14 )	0.69 ( 0.13 )	-0.53 ( -2.64 )
Genital Haemorrhage	1	4.26 ( 0.48 - 38.08 )	4.25 ( 1.99 )	3.6 ( 0.58 )	1.85 ( -0.51 )
Glomerulonephritis Minimal Lesion	1	0.71 ( 0.1 - 5.24 )	0.71 ( 0.11 )	0.72 ( 0.14 )	-0.47 ( -2.59 )
Tonsillitis	1	0.57 ( 0.08 - 4.16 )	0.57 ( 0.32 )	0.58 ( 0.11 )	-0.78 ( -2.89 )
Intentional Product Misuse	1	0.42 ( 0.06 - 3.02 )	0.42 ( 0.8 )	0.43 ( 0.08 )	-1.22 ( -3.31 )
Urticaria	1	0.25 ( 0.03 - 1.8 )	0.25 ( 2.21 )	0.26 ( 0.05 )	-1.94 ( -4.01 )
Type I Hypersensitivity	1	3.4 ( 0.4 - 29.14 )	3.4 ( 1.41 )	3 ( 0.5 )	1.59 ( -0.73 )
Blood Test Abnormal	1	3.4 ( 0.4 - 29.14 )	3.4 ( 1.41 )	3 ( 0.5 )	1.59 ( -0.73 )
Gastrostomy	1	Inf ( NaN - Inf )	Inf ( 17.02 )	18.02 ( 0 )	4.17 ( 1.29 )
Tracheostomy	1	2.13 ( 0.27 - 17.01 )	2.13 ( 0.53 )	2 ( 0.35 )	1 ( -1.23 )
Pneumonia Serratia	1	17.02 ( 1.06 - 272.17 )	17.02 ( 7.54 )	9.01 ( 0.89 )	3.17 ( 0.54 )
Septic Rash	1	Inf ( NaN - Inf )	Inf ( 17.02 )	18.02 ( 0 )	4.17 ( 1.29 )
Pneumococcal Infection	1	0.85 ( 0.11 - 6.34 )	0.85 ( 0.02 )	0.86 ( 0.16 )	-0.22 ( -2.35 )
Pneumonia Pneumococcal	1	0.71 ( 0.1 - 5.24 )	0.71 ( 0.11 )	0.72 ( 0.14 )	-0.47 ( -2.59 )
Dermatitis Atopic	1	2.84 ( 0.34 - 23.57 )	2.84 ( 1.02 )	2.57 ( 0.44 )	1.36 ( -0.92 )
Pneumocystis Jirovecii Infection	1	0.37 ( 0.05 - 2.68 )	0.37 ( 1.05 )	0.38 ( 0.07 )	-1.38 ( -3.47 )
Sudden Cardiac Death	1	2.43 ( 0.3 - 19.77 )	2.43 ( 0.74 )	2.25 ( 0.39 )	1.17 ( -1.08 )
Inflammatory Marker Increased	1	0.35 ( 0.05 - 2.52 )	0.35 ( 1.2 )	0.36 ( 0.07 )	-1.47 ( -3.55 )
Pulmonary Mucormycosis	1	0.5 ( 0.07 - 3.66 )	0.5 ( 0.48 )	0.51 ( 0.1 )	-0.96 ( -3.05 )
Lung Lobectomy	1	5.67 ( 0.59 - 54.55 )	5.67 ( 2.89 )	4.5 ( 0.68 )	2.17 ( -0.24 )
Endocrine Disorder	1	3.4 ( 0.4 - 29.14 )	3.4 ( 1.41 )	3 ( 0.5 )	1.59 ( -0.73 )
Symphysiolysis	1	Inf ( NaN - Inf )	Inf ( 17.02 )	18.02 ( 0 )	4.17 ( 1.29 )
Haemorrhoids	1	0.4 ( 0.05 - 2.87 )	0.4 ( 0.9 )	0.41 ( 0.08 )	-1.29 ( -3.37 )
Sporotrichosis	1	Inf ( NaN - Inf )	Inf ( 17.02 )	18.02 ( 0 )	4.17 ( 1.29 )
Anal Infection	1	1.55 ( 0.2 - 11.99 )	1.55 ( 0.18 )	1.5 ( 0.27 )	0.59 ( -1.61 )
Hepatic Fibrosis	1	0.41 ( 0.06 - 2.94 )	0.41 ( 0.85 )	0.42 ( 0.08 )	-1.25 ( -3.34 )
Hepatosplenic Candidiasis	1	1.89 ( 0.24 - 14.93 )	1.89 ( 0.38 )	1.8 ( 0.32 )	0.85 ( -1.37 )
Pre-Engraftment Immune Reaction	1	0.42 ( 0.06 - 3.02 )	0.42 ( 0.8 )	0.43 ( 0.08 )	-1.22 ( -3.31 )
Hypophosphataemia	1	0.39 ( 0.05 - 2.81 )	0.39 ( 0.95 )	0.4 ( 0.08 )	-1.32 ( -3.4 )
Cholecystitis Acute	1	0.59 ( 0.08 - 4.31 )	0.59 ( 0.28 )	0.6 ( 0.11 )	-0.74 ( -2.84 )
Hepatopulmonary Syndrome	1	4.26 ( 0.48 - 38.08 )	4.25 ( 1.99 )	3.6 ( 0.58 )	1.85 ( -0.51 )
Oculogyric Crisis	1	Inf ( NaN - Inf )	Inf ( 17.02 )	18.02 ( 0 )	4.17 ( 1.29 )
Respiratory Depression	1	0.71 ( 0.1 - 5.24 )	0.71 ( 0.11 )	0.72 ( 0.14 )	-0.47 ( -2.59 )
Enterocolitis Fungal	1	Inf ( NaN - Inf )	Inf ( 17.02 )	18.02 ( 0 )	4.17 ( 1.29 )
Blood Bilirubin Decreased	1	3.4 ( 0.4 - 29.14 )	3.4 ( 1.41 )	3 ( 0.5 )	1.59 ( -0.73 )
Back Pain	1	0.13 ( 0.02 - 0.89 )	0.13 ( 6.08 )	0.13 ( 0.03 )	-2.93 ( -4.98 )
Rhabdomyosarcoma	1	4.26 ( 0.48 - 38.08 )	4.25 ( 1.99 )	3.6 ( 0.58 )	1.85 ( -0.51 )
Calcineurin Inhibitor Induced Pain Syndrome	1	17.02 ( 1.06 - 272.17 )	17.02 ( 7.54 )	9.01 ( 0.89 )	3.17 ( 0.54 )
Bacterial Test Positive	1	1.7 ( 0.22 - 13.3 )	1.7 ( 0.26 )	1.64 ( 0.29 )	0.71 ( -1.49 )
Vanishing Bile Duct Syndrome	1	0.85 ( 0.11 - 6.34 )	0.85 ( 0.02 )	0.86 ( 0.16 )	-0.22 ( -2.35 )
Salmonella Bacteraemia	1	8.51 ( 0.77 - 93.87 )	8.51 ( 4.42 )	6.01 ( 0.81 )	2.59 ( 0.09 )
Product Prescribing Issue	1	2.13 ( 0.27 - 17.01 )	2.13 ( 0.53 )	2 ( 0.35 )	1 ( -1.23 )
Genital Herpes Simplex	1	4.26 ( 0.48 - 38.08 )	4.25 ( 1.99 )	3.6 ( 0.58 )	1.85 ( -0.51 )
Failed In Vitro Fertilisation	1	Inf ( NaN - Inf )	Inf ( 17.02 )	18.02 ( 0 )	4.17 ( 1.29 )
Platelet Engraftment Failure	1	Inf ( NaN - Inf )	Inf ( 17.02 )	18.02 ( 0 )	4.17 ( 1.29 )
Subacute Sclerosing Panencephalitis	1	5.67 ( 0.59 - 54.55 )	5.67 ( 2.89 )	4.5 ( 0.68 )	2.17 ( -0.24 )
Atrophy	1	1.22 ( 0.16 - 9.25 )	1.22 ( 0.04 )	1.2 ( 0.22 )	0.26 ( -1.9 )
Food Refusal	1	Inf ( NaN - Inf )	Inf ( 17.02 )	18.02 ( 0 )	4.17 ( 1.29 )
Measles	1	1.89 ( 0.24 - 14.93 )	1.89 ( 0.38 )	1.8 ( 0.32 )	0.85 ( -1.37 )
Transfusion-Related Acute Lung Injury	1	1 ( 0.13 - 7.52 )	1 ( 0 )	1 ( 0.19 )	0 ( -2.14 )
Temperature Intolerance	1	2.43 ( 0.3 - 19.77 )	2.43 ( 0.74 )	2.25 ( 0.39 )	1.17 ( -1.08 )
Lethargy	1	0.22 ( 0.03 - 1.59 )	0.22 ( 2.71 )	0.23 ( 0.04 )	-2.11 ( -4.18 )
Cardiovascular Insufficiency	1	4.26 ( 0.48 - 38.08 )	4.25 ( 1.99 )	3.6 ( 0.58 )	1.85 ( -0.51 )
Dyskinesia	1	0.4 ( 0.05 - 2.87 )	0.4 ( 0.9 )	0.41 ( 0.08 )	-1.29 ( -3.37 )
Eye Movement Disorder	1	0.85 ( 0.11 - 6.34 )	0.85 ( 0.02 )	0.86 ( 0.16 )	-0.22 ( -2.35 )
Histiocytic Necrotising Lymphadenitis	1	Inf ( NaN - Inf )	Inf ( 17.02 )	18.02 ( 0 )	4.17 ( 1.29 )
Hypouricaemia	1	1.31 ( 0.17 - 10.01 )	1.31 ( 0.07 )	1.29 ( 0.23 )	0.36 ( -1.81 )
Acidosis Hyperchloraemic	1	1.31 ( 0.17 - 10.01 )	1.31 ( 0.07 )	1.29 ( 0.23 )	0.36 ( -1.81 )
Glycosuria	1	1.42 ( 0.18 - 10.91 )	1.42 ( 0.11 )	1.39 ( 0.25 )	0.47 ( -1.71 )
Idiopathic Intracranial Hypertension	1	3.4 ( 0.4 - 29.14 )	3.4 ( 1.41 )	3 ( 0.5 )	1.59 ( -0.73 )
Gastroenteritis Eosinophilic	1	2.84 ( 0.34 - 23.57 )	2.84 ( 1.02 )	2.57 ( 0.44 )	1.36 ( -0.92 )
Cerebral Atrophy	1	0.85 ( 0.11 - 6.34 )	0.85 ( 0.02 )	0.86 ( 0.16 )	-0.22 ( -2.35 )
Lumbar Vertebral Fracture	1	5.67 ( 0.59 - 54.55 )	5.67 ( 2.89 )	4.5 ( 0.68 )	2.17 ( -0.24 )
Haematological Infection	1	0.34 ( 0.05 - 2.46 )	0.34 ( 1.25 )	0.35 ( 0.07 )	-1.5 ( -3.58 )
Salmonellosis	1	2.13 ( 0.27 - 17.01 )	2.13 ( 0.53 )	2 ( 0.35 )	1 ( -1.23 )
Cardiovascular Disorder	1	0.46 ( 0.06 - 3.35 )	0.46 ( 0.62 )	0.47 ( 0.09 )	-1.08 ( -3.17 )
Cerebral Infarction	1	0.2 ( 0.03 - 1.47 )	0.21 ( 3.05 )	0.21 ( 0.04 )	-2.22 ( -4.29 )
Asphyxia	1	2.84 ( 0.34 - 23.57 )	2.84 ( 1.02 )	2.57 ( 0.44 )	1.36 ( -0.92 )
Respiratory Tract Haemorrhage	1	1.89 ( 0.24 - 14.93 )	1.89 ( 0.38 )	1.8 ( 0.32 )	0.85 ( -1.37 )
Idiopathic Pulmonary Fibrosis	1	8.51 ( 0.77 - 93.87 )	8.51 ( 4.42 )	6.01 ( 0.81 )	2.59 ( 0.09 )
Passenger Lymphocyte Syndrome	1	1.42 ( 0.18 - 10.91 )	1.42 ( 0.11 )	1.39 ( 0.25 )	0.47 ( -1.71 )
Adenocarcinoma	1	1.22 ( 0.16 - 9.25 )	1.22 ( 0.04 )	1.2 ( 0.22 )	0.26 ( -1.9 )
Small Intestinal Perforation	1	1.55 ( 0.2 - 11.99 )	1.55 ( 0.18 )	1.5 ( 0.27 )	0.59 ( -1.61 )
Cytomegalovirus Enteritis	1	0.39 ( 0.05 - 2.81 )	0.39 ( 0.95 )	0.4 ( 0.08 )	-1.32 ( -3.4 )
Red Blood Cell Count Decreased	1	0.23 ( 0.03 - 1.68 )	0.23 ( 2.49 )	0.24 ( 0.05 )	-2.04 ( -4.11 )
Biopsy Lung Abnormal	1	17.02 ( 1.06 - 272.17 )	17.02 ( 7.54 )	9.01 ( 0.89 )	3.17 ( 0.54 )
Skin Disorder	1	0.41 ( 0.06 - 2.94 )	0.41 ( 0.85 )	0.42 ( 0.08 )	-1.25 ( -3.34 )
Acute Pulmonary Oedema	1	0.33 ( 0.05 - 2.41 )	0.33 ( 1.31 )	0.35 ( 0.07 )	-1.53 ( -3.61 )
Amnesia	1	0.22 ( 0.03 - 1.61 )	0.22 ( 2.66 )	0.23 ( 0.04 )	-2.1 ( -4.16 )
Vitamin C Deficiency	1	Inf ( NaN - Inf )	Inf ( 17.02 )	18.02 ( 0 )	4.17 ( 1.29 )
Growth Accelerated	1	Inf ( NaN - Inf )	Inf ( 17.02 )	18.02 ( 0 )	4.17 ( 1.29 )
Secondary Sexual Characteristics Absence	1	Inf ( NaN - Inf )	Inf ( 17.02 )	18.02 ( 0 )	4.17 ( 1.29 )
Allogenic Bone Marrow Transplantation Therapy	1	5.67 ( 0.59 - 54.55 )	5.67 ( 2.89 )	4.5 ( 0.68 )	2.17 ( -0.24 )
Red Blood Cell Schistocytes Present	1	0.57 ( 0.08 - 4.16 )	0.57 ( 0.32 )	0.58 ( 0.11 )	-0.78 ( -2.89 )
Gallbladder Enlargement	1	5.67 ( 0.59 - 54.55 )	5.67 ( 2.89 )	4.5 ( 0.68 )	2.17 ( -0.24 )
Hypopnoea	1	8.51 ( 0.77 - 93.87 )	8.51 ( 4.42 )	6.01 ( 0.81 )	2.59 ( 0.09 )
Oedema Mouth	1	5.67 ( 0.59 - 54.55 )	5.67 ( 2.89 )	4.5 ( 0.68 )	2.17 ( -0.24 )
Blindness Cortical	1	0.74 ( 0.1 - 5.48 )	0.74 ( 0.09 )	0.75 ( 0.14 )	-0.41 ( -2.53 )
Muscle Rigidity	1	1.7 ( 0.22 - 13.3 )	1.7 ( 0.26 )	1.64 ( 0.29 )	0.71 ( -1.49 )
Depression	1	0.21 ( 0.03 - 1.49 )	0.21 ( 2.99 )	0.22 ( 0.04 )	-2.2 ( -4.27 )
Abdominal Compartment Syndrome	1	1.13 ( 0.15 - 8.59 )	1.13 ( 0.01 )	1.13 ( 0.21 )	0.17 ( -1.99 )
Clostridium Colitis	1	1.42 ( 0.18 - 10.91 )	1.42 ( 0.11 )	1.39 ( 0.25 )	0.47 ( -1.71 )
Gastric Ulcer	1	0.33 ( 0.05 - 2.37 )	0.33 ( 1.36 )	0.34 ( 0.06 )	-1.56 ( -3.63 )
Haemodynamic Instability	1	0.22 ( 0.03 - 1.55 )	0.22 ( 2.82 )	0.23 ( 0.04 )	-2.15 ( -4.22 )
Influenza Virus Test Positive	1	8.51 ( 0.77 - 93.87 )	8.51 ( 4.42 )	6.01 ( 0.81 )	2.59 ( 0.09 )
Lactic Acidosis	1	0.25 ( 0.03 - 1.78 )	0.25 ( 2.27 )	0.26 ( 0.05 )	-1.96 ( -4.03 )
Supraventricular Tachycardia	1	0.52 ( 0.07 - 3.77 )	0.52 ( 0.44 )	0.53 ( 0.1 )	-0.92 ( -3.01 )
Fibrosis	1	0.61 ( 0.08 - 4.47 )	0.61 ( 0.24 )	0.62 ( 0.12 )	-0.69 ( -2.79 )
Duodenal Stenosis	1	Inf ( NaN - Inf )	Inf ( 17.02 )	18.02 ( 0 )	4.17 ( 1.29 )
Oral Lichen Planus	1	2.84 ( 0.34 - 23.57 )	2.84 ( 1.02 )	2.57 ( 0.44 )	1.36 ( -0.92 )
Intracranial Hypotension	1	8.51 ( 0.77 - 93.87 )	8.51 ( 4.42 )	6.01 ( 0.81 )	2.59 ( 0.09 )
Blood Glucose Increased	1	0.24 ( 0.03 - 1.73 )	0.24 ( 2.38 )	0.25 ( 0.05 )	-2 ( -4.07 )
Granulomatous Liver Disease	1	3.4 ( 0.4 - 29.14 )	3.4 ( 1.41 )	3 ( 0.5 )	1.59 ( -0.73 )
Immunosuppressant Drug Level Decreased	1	0.18 ( 0.03 - 1.31 )	0.18 ( 3.61 )	0.19 ( 0.04 )	-2.38 ( -4.44 )
Hyporeflexia	1	1.55 ( 0.2 - 11.99 )	1.55 ( 0.18 )	1.5 ( 0.27 )	0.59 ( -1.61 )
Effusion	1	1.89 ( 0.24 - 14.93 )	1.89 ( 0.38 )	1.8 ( 0.32 )	0.85 ( -1.37 )
Meningoencephalitis Amoebic	1	1.89 ( 0.24 - 14.93 )	1.89 ( 0.38 )	1.8 ( 0.32 )	0.85 ( -1.37 )
Csf Protein Increased	1	0.85 ( 0.11 - 6.34 )	0.85 ( 0.02 )	0.86 ( 0.16 )	-0.22 ( -2.35 )
Autonomic Nervous System Imbalance	1	0.95 ( 0.13 - 7.08 )	0.95 ( 0 )	0.95 ( 0.18 )	-0.08 ( -2.22 )
Quadriplegia	1	0.77 ( 0.1 - 5.74 )	0.77 ( 0.06 )	0.78 ( 0.15 )	-0.35 ( -2.48 )
Cerebral Haematoma	1	1.42 ( 0.18 - 10.91 )	1.42 ( 0.11 )	1.39 ( 0.25 )	0.47 ( -1.71 )
Hemiparesis	1	0.36 ( 0.05 - 2.62 )	0.36 ( 1.1 )	0.38 ( 0.07 )	-1.41 ( -3.5 )
Plasmacytoma	1	0.85 ( 0.11 - 6.34 )	0.85 ( 0.02 )	0.86 ( 0.16 )	-0.22 ( -2.35 )
Central Obesity	1	8.51 ( 0.77 - 93.87 )	8.51 ( 4.42 )	6.01 ( 0.81 )	2.59 ( 0.09 )
Skin Striae	1	4.26 ( 0.48 - 38.08 )	4.25 ( 1.99 )	3.6 ( 0.58 )	1.85 ( -0.51 )
Drug Intolerance	1	0.23 ( 0.03 - 1.68 )	0.23 ( 2.49 )	0.24 ( 0.05 )	-2.04 ( -4.11 )
Liver Transplant	1	0.42 ( 0.06 - 3.02 )	0.42 ( 0.8 )	0.43 ( 0.08 )	-1.22 ( -3.31 )
Dizziness	1	0.1 ( 0.01 - 0.74 )	0.1 ( 7.7 )	0.11 ( 0.02 )	-3.19 ( -5.25 )
Candida Pneumonia	1	1.22 ( 0.16 - 9.25 )	1.22 ( 0.04 )	1.2 ( 0.22 )	0.26 ( -1.9 )
Hypernatraemia	1	0.55 ( 0.07 - 4.02 )	0.55 ( 0.36 )	0.56 ( 0.11 )	-0.83 ( -2.93 )
Acinetobacter Test Positive	1	4.26 ( 0.48 - 38.08 )	4.25 ( 1.99 )	3.6 ( 0.58 )	1.85 ( -0.51 )
Leukodystrophy	1	17.02 ( 1.06 - 272.17 )	17.02 ( 7.54 )	9.01 ( 0.89 )	3.17 ( 0.54 )
Cerebral Calcification	1	17.02 ( 1.06 - 272.17 )	17.02 ( 7.54 )	9.01 ( 0.89 )	3.17 ( 0.54 )
Hypertrophic Cardiomyopathy	1	0.85 ( 0.11 - 6.34 )	0.85 ( 0.02 )	0.86 ( 0.16 )	-0.22 ( -2.35 )
Hepatitis B	1	0.24 ( 0.03 - 1.7 )	0.24 ( 2.43 )	0.25 ( 0.05 )	-2.02 ( -4.09 )
Orthostatic Hypotension	1	0.77 ( 0.1 - 5.74 )	0.77 ( 0.06 )	0.78 ( 0.15 )	-0.35 ( -2.48 )
Hyperlactacidaemia	1	17.02 ( 1.06 - 272.17 )	17.02 ( 7.54 )	9.01 ( 0.89 )	3.17 ( 0.54 )
Abnormal Behaviour	1	0.9 ( 0.12 - 6.69 )	0.9 ( 0.01 )	0.9 ( 0.17 )	-0.15 ( -2.29 )
Lung Infiltration	1	0.14 ( 0.02 - 0.98 )	0.14 ( 5.38 )	0.14 ( 0.03 )	-2.79 ( -4.85 )
Methylobacterium Infection	1	17.02 ( 1.06 - 272.17 )	17.02 ( 7.54 )	9.01 ( 0.89 )	3.17 ( 0.54 )
Heart Transplant Rejection	1	0.23 ( 0.03 - 1.68 )	0.23 ( 2.49 )	0.24 ( 0.05 )	-2.04 ( -4.11 )
Karyotype Analysis Abnormal	1	17.02 ( 1.06 - 272.17 )	17.02 ( 7.54 )	9.01 ( 0.89 )	3.17 ( 0.54 )
Aborted Pregnancy	1	Inf ( NaN - Inf )	Inf ( 17.02 )	18.02 ( 0 )	4.17 ( 1.29 )
Neoplasm Progression	1	0.22 ( 0.03 - 1.61 )	0.22 ( 2.66 )	0.23 ( 0.04 )	-2.1 ( -4.16 )
International Normalised Ratio Increased	1	0.61 ( 0.08 - 4.47 )	0.61 ( 0.24 )	0.62 ( 0.12 )	-0.69 ( -2.79 )
Hepatic Neoplasm	1	1.42 ( 0.18 - 10.91 )	1.42 ( 0.11 )	1.39 ( 0.25 )	0.47 ( -1.71 )
Dental Caries	1	5.67 ( 0.59 - 54.55 )	5.67 ( 2.89 )	4.5 ( 0.68 )	2.17 ( -0.24 )
Micrognathia	1	Inf ( NaN - Inf )	Inf ( 17.02 )	18.02 ( 0 )	4.17 ( 1.29 )
Tooth Erosion	1	Inf ( NaN - Inf )	Inf ( 17.02 )	18.02 ( 0 )	4.17 ( 1.29 )
Haemorrhagic Infarction	1	Inf ( NaN - Inf )	Inf ( 17.02 )	18.02 ( 0 )	4.17 ( 1.29 )
Lymphadenopathy	1	0.11 ( 0.02 - 0.82 )	0.11 ( 6.77 )	0.12 ( 0.02 )	-3.05 ( -5.1 )
