# Supplementary material for: Adverse Events Associated with Busulfan in HSCT Pre-Transplant Conditioning: A Retrospective Pharmacovigilance Study of the FAERS Database
Source: Research Square preprint supplement (doi:10.21203/rs.3.rs-6454932/v1), 2025-05-29
Supplement: Supplementary file 5 [file 9dd7109d1f7b9b46bd4bddb7.docx]

**Supplementary Table S1. Algorithm for disproportionate**

| **Drugs** | **Target AE cases** | **All other AE cases** |
| --- | --- | --- |
| Target drug | a | b |
| All other drug | c | d |

| **Method** | **Formula** | **Requirements** |
| --- | --- | --- |
| ROR |  | a≥3, 95% CI (lower limit)＞1 |
|  |
|  |  | a≥3, 2≥4, ≥2 |
| BCPNN |  | IC025＞0 |
| EBGM |  | EGBM05＞2 |
