# Supplementary material for: Adverse Events Associated with Busulfan in HSCT Pre-Transplant Conditioning: A Retrospective Pharmacovigilance Study of the FAERS Database
Source: Research Square preprint supplement (doi:10.21203/rs.3.rs-6454932/v1), 2025-05-29
Supplement: Supplementary file 6 [file d89fdfd41ad5ee91127e1af2.xlsx]

## Sheet: Sheet1
SOC name	Reported cases(a)	Reported case proportion, %	ROR(95%Cl)	PRR	χ2	EBGM(EBGM05)	IC(IC025)
Infections And Infestations	2796	0.243363	1.36 ( 1.3 - 1.42 )	1.27	187.51	1.25 ( 1.21 )	0.33 ( 0.26 )
Injury, Poisoning And Procedural Complications	1340	0.116633	1.52 ( 1.43 - 1.61 )	1.46	193.12	1.42 ( 1.35 )	0.51 ( 0.42 )
General Disorders And Administration Site Conditions	882	0.0767691	0.77 ( 0.72 - 0.83 )	0.79	52.95	0.8 ( 0.75 )	-0.33 ( -0.43 )
Blood And Lymphatic System Disorders	840	0.0731134	1.24 ( 1.15 - 1.33 )	1.22	33.29	1.21 ( 1.13 )	0.27 ( 0.16 )
Respiratory, Thoracic And Mediastinal Disorders	821	0.0714597	1.48 ( 1.37 - 1.59 )	1.45	109.54	1.41 ( 1.33 )	0.5 ( 0.39 )
Gastrointestinal Disorders	736	0.0640613	1.03 ( 0.96 - 1.12 )	1.03	0.73	1.03 ( 0.97 )	0.04 ( -0.07 )
Immune System Disorders	646	0.0562277	0.72 ( 0.66 - 0.78 )	0.73	65.35	0.74 ( 0.69 )	-0.43 ( -0.55 )
Hepatobiliary Disorders	513	0.0446514	2 ( 1.82 - 2.2 )	1.96	221.41	1.86 ( 1.72 )	0.9 ( 0.76 )
Renal And Urinary Disorders	453	0.039429	0.81 ( 0.74 - 0.89 )	0.82	18.37	0.83 ( 0.76 )	-0.28 ( -0.42 )
Investigations	425	0.0369919	0.51 ( 0.47 - 0.57 )	0.53	181.66	0.55 ( 0.5 )	-0.87 ( -1.02 )
Nervous System Disorders	342	0.0297676	0.59 ( 0.53 - 0.66 )	0.6	90.57	0.62 ( 0.56 )	-0.7 ( -0.86 )
Neoplasms Benign, Malignant And Unspecified (Incl Cysts And Polyps)	326	0.028375	0.67 ( 0.6 - 0.75 )	0.68	48.02	0.7 ( 0.63 )	-0.52 ( -0.69 )
Cardiac Disorders	270	0.0235007	1.01 ( 0.89 - 1.14 )	1.01	0.01	1.01 ( 0.91 )	0.01 ( -0.17 )
Vascular Disorders	270	0.0235007	0.98 ( 0.87 - 1.11 )	0.98	0.1	0.98 ( 0.89 )	-0.03 ( -0.21 )
Skin And Subcutaneous Tissue Disorders	168	0.0146227	0.65 ( 0.55 - 0.75 )	0.65	31	0.66 ( 0.58 )	-0.59 ( -0.82 )
Metabolism And Nutrition Disorders	155	0.0134912	0.61 ( 0.52 - 0.72 )	0.62	36.11	0.63 ( 0.55 )	-0.66 ( -0.9 )
Reproductive System And Breast Disorders	101	0.00879102	2.35 ( 1.91 - 2.9 )	2.34	68.66	2.18 ( 1.83 )	1.13 ( 0.82 )
Endocrine Disorders	95	0.00826878	2.5 ( 2.01 - 3.1 )	2.48	73.84	2.3 ( 1.92 )	1.2 ( 0.89 )
Surgical And Medical Procedures	87	0.00757246	0.89 ( 0.72 - 1.11 )	0.89	1.09	0.9 ( 0.75 )	-0.16 ( -0.47 )
Musculoskeletal And Connective Tissue Disorders	64	0.00557055	0.36 ( 0.28 - 0.46 )	0.36	71.44	0.38 ( 0.3 )	-1.41 ( -1.78 )
Psychiatric Disorders	63	0.00548351	0.42 ( 0.33 - 0.54 )	0.42	48.61	0.44 ( 0.36 )	-1.19 ( -1.56 )
Eye Disorders	41	0.00356863	0.39 ( 0.28 - 0.53 )	0.39	39.05	0.4 ( 0.31 )	-1.32 ( -1.77 )
Congenital, Familial And Genetic Disorders	28	0.00243711	1.57 ( 1.07 - 2.31 )	1.57	5.3	1.52 ( 1.1 )	0.61 ( 0.05 )
Ear And Labyrinth Disorders	14	0.00121856	0.92 ( 0.54 - 1.57 )	0.92	0.1	0.92 ( 0.59 )	-0.12 ( -0.88 )
Social Circumstances	6	0.000522239	0.57 ( 0.25 - 1.29 )	0.57	1.86	0.59 ( 0.3 )	-0.77 ( -1.88 )
Pregnancy, Puerperium And Perinatal Conditions	5	0.000435199	0.21 ( 0.09 - 0.52 )	0.21	14.23	0.22 ( 0.11 )	-2.16 ( -3.34 )
Product Issues	2	0.00017408	0.15 ( 0.04 - 0.59 )	0.15	9.9	0.15 ( 0.05 )	-2.7 ( -4.38 )
