# Supplementary material for: Adverse Events Associated with Busulfan in HSCT Pre-Transplant Conditioning: A Retrospective Pharmacovigilance Study of the FAERS Database
Source: Research Square preprint supplement (doi:10.21203/rs.3.rs-6454932/v1), 2025-05-29
Supplement: Supplementary file 7 [file d8b70c06b0e7d705b11793eb.xlsx]

## Sheet: Sheet1
PT	Cases(n)	ROR(95%CI)	PRR(χ2)	EBGM(EBGM05)	IC(IC025)
Product Use In Unapproved Indication	707	4.51 ( 4.15 - 4.91 )	4.3 ( 1456.17 )	3.64 ( 3.39 )	1.86 ( 1.74 )
Off Label Use	285	0.86 ( 0.76 - 0.97 )	0.86 ( 6.13 )	0.87 ( 0.79 )	-0.2 ( -0.38 )
Venoocclusive Liver Disease	261	5.12 ( 4.45 - 5.88 )	5.03 ( 655.34 )	4.12 ( 3.66 )	2.04 ( 1.84 )
Mucosal Inflammation	217	3.11 ( 2.68 - 3.59 )	3.07 ( 258.3 )	2.75 ( 2.44 )	1.46 ( 1.25 )
Cytomegalovirus Infection	192	1.27 ( 1.1 - 1.48 )	1.27 ( 10.31 )	1.25 ( 1.1 )	0.32 ( 0.11 )
Cytomegalovirus Infection Reactivation	153	3.98 ( 3.34 - 4.75 )	3.94 ( 274.29 )	3.39 ( 2.93 )	1.76 ( 1.51 )
Febrile Neutropenia	149	1.63 ( 1.37 - 1.93 )	1.62 ( 32.49 )	1.57 ( 1.36 )	0.65 ( 0.4 )
Cystitis Haemorrhagic	138	3.05 ( 2.54 - 3.66 )	3.03 ( 159.88 )	2.72 ( 2.34 )	1.45 ( 1.18 )
Graft Versus Host Disease	132	1.21 ( 1.02 - 1.45 )	1.21 ( 4.54 )	1.2 ( 1.03 )	0.26 ( 0 )
Sepsis	131	1.35 ( 1.13 - 1.61 )	1.34 ( 10.69 )	1.32 ( 1.13 )	0.4 ( 0.14 )
Thrombotic Microangiopathy	129	1.67 ( 1.39 - 2 )	1.66 ( 30.98 )	1.6 ( 1.37 )	0.68 ( 0.41 )
Respiratory Failure	127	1.87 ( 1.56 - 2.25 )	1.86 ( 45.99 )	1.78 ( 1.52 )	0.83 ( 0.56 )
Stomatitis	118	3.52 ( 2.89 - 4.3 )	3.5 ( 175.59 )	3.08 ( 2.61 )	1.62 ( 1.33 )
Venoocclusive Disease	118	3.94 ( 3.22 - 4.81 )	3.91 ( 208.77 )	3.37 ( 2.85 )	1.75 ( 1.46 )
Diarrhoea	110	0.87 ( 0.72 - 1.05 )	0.87 ( 2.08 )	0.88 ( 0.75 )	-0.19 ( -0.47 )
Bk Virus Infection	103	2.43 ( 1.97 - 2.99 )	2.41 ( 75.16 )	2.24 ( 1.88 )	1.16 ( 0.86 )
Pyrexia	102	0.63 ( 0.52 - 0.77 )	0.63 ( 21.23 )	0.65 ( 0.55 )	-0.63 ( -0.92 )
Pneumonia	101	0.98 ( 0.8 - 1.2 )	0.98 ( 0.04 )	0.98 ( 0.83 )	-0.03 ( -0.32 )
Acute Graft Versus Host Disease	98	0.9 ( 0.74 - 1.11 )	0.91 ( 0.94 )	0.91 ( 0.77 )	-0.14 ( -0.43 )
Thrombocytopenia	90	1.34 ( 1.08 - 1.67 )	1.34 ( 7.32 )	1.32 ( 1.1 )	0.4 ( 0.08 )
Multiple Organ Dysfunction Syndrome	90	1.98 ( 1.59 - 2.46 )	1.97 ( 38.77 )	1.87 ( 1.56 )	0.9 ( 0.59 )
Cytomegalovirus Viraemia	86	1.87 ( 1.49 - 2.34 )	1.86 ( 31.08 )	1.78 ( 1.47 )	0.83 ( 0.5 )
Acute Kidney Injury	80	0.88 ( 0.7 - 1.1 )	0.88 ( 1.3 )	0.88 ( 0.73 )	-0.18 ( -0.51 )
Post Transplant Lymphoproliferative Disorder	78	1.65 ( 1.3 - 2.08 )	1.64 ( 17.91 )	1.59 ( 1.3 )	0.66 ( 0.33 )
Nausea	77	1.2 ( 0.95 - 1.51 )	1.2 ( 2.32 )	1.18 ( 0.97 )	0.24 ( -0.1 )
Infection	74	0.96 ( 0.76 - 1.21 )	0.96 ( 0.12 )	0.96 ( 0.79 )	-0.06 ( -0.4 )
Pancytopenia	65	1.19 ( 0.93 - 1.53 )	1.19 ( 1.86 )	1.18 ( 0.95 )	0.24 ( -0.13 )
Drug Ineffective	65	0.43 ( 0.33 - 0.55 )	0.43 ( 48.5 )	0.44 ( 0.36 )	-1.17 ( -1.53 )
Septic Shock	64	1.33 ( 1.03 - 1.71 )	1.32 ( 4.73 )	1.3 ( 1.05 )	0.38 ( 0.01 )
Neutropenia	63	0.88 ( 0.68 - 1.13 )	0.88 ( 0.99 )	0.89 ( 0.72 )	-0.17 ( -0.55 )
Transplant Failure	61	2.47 ( 1.89 - 3.24 )	2.46 ( 46.56 )	2.28 ( 1.82 )	1.19 ( 0.8 )
Bacteraemia	58	2.52 ( 1.91 - 3.32 )	2.51 ( 46.01 )	2.32 ( 1.84 )	1.21 ( 0.81 )
Haemophagocytic Lymphohistiocytosis	57	4.13 ( 3.09 - 5.52 )	4.11 ( 108.66 )	3.51 ( 2.76 )	1.81 ( 1.4 )
Adenovirus Infection	56	1.32 ( 1.01 - 1.74 )	1.32 ( 4.05 )	1.3 ( 1.03 )	0.38 ( -0.02 )
Chronic Graft Versus Host Disease	55	0.74 ( 0.57 - 0.97 )	0.74 ( 4.69 )	0.75 ( 0.6 )	-0.41 ( -0.8 )
Renal Failure	55	0.87 ( 0.66 - 1.14 )	0.87 ( 0.99 )	0.88 ( 0.7 )	-0.19 ( -0.58 )
Acute Graft Versus Host Disease In Skin	53	0.7 ( 0.53 - 0.92 )	0.7 ( 6.58 )	0.71 ( 0.57 )	-0.49 ( -0.89 )
Vomiting	51	0.78 ( 0.59 - 1.03 )	0.78 ( 3.04 )	0.79 ( 0.62 )	-0.34 ( -0.75 )
Epstein-Barr Virus Infection	50	1.04 ( 0.78 - 1.39 )	1.04 ( 0.08 )	1.04 ( 0.82 )	0.06 ( -0.36 )
Acute Respiratory Distress Syndrome	50	1.63 ( 1.22 - 2.18 )	1.63 ( 11.17 )	1.58 ( 1.24 )	0.66 ( 0.23 )
Death	49	0.68 ( 0.51 - 0.9 )	0.68 ( 7.29 )	0.69 ( 0.54 )	-0.54 ( -0.95 )
Graft Versus Host Disease In Skin	47	1.15 ( 0.86 - 1.55 )	1.15 ( 0.88 )	1.14 ( 0.89 )	0.19 ( -0.24 )
Pleural Effusion	47	1.5 ( 1.11 - 2.02 )	1.49 ( 7.07 )	1.45 ( 1.13 )	0.54 ( 0.11 )
Staphylococcal Infection	46	1.77 ( 1.31 - 2.41 )	1.77 ( 14.05 )	1.7 ( 1.32 )	0.77 ( 0.32 )
Malaise	43	1.51 ( 1.1 - 2.06 )	1.51 ( 6.78 )	1.47 ( 1.13 )	0.55 ( 0.1 )
Aplastic Anaemia	43	3.61 ( 2.6 - 5.02 )	3.6 ( 66.92 )	3.15 ( 2.39 )	1.66 ( 1.18 )
Epstein-Barr Virus Infection Reactivation	43	4.13 ( 2.96 - 5.77 )	4.12 ( 82.14 )	3.52 ( 2.66 )	1.82 ( 1.34 )
Gastrointestinal Haemorrhage	42	2.26 ( 1.64 - 3.12 )	2.26 ( 26.05 )	2.11 ( 1.61 )	1.08 ( 0.61 )
Viral Haemorrhagic Cystitis	41	2.77 ( 1.99 - 3.85 )	2.76 ( 39.81 )	2.52 ( 1.91 )	1.33 ( 0.86 )
Graft Versus Host Disease In Gastrointestinal Tract	41	0.96 ( 0.7 - 1.31 )	0.96 ( 0.07 )	0.96 ( 0.74 )	-0.06 ( -0.52 )
Autoimmune Haemolytic Anaemia	40	6.72 ( 4.66 - 9.69 )	6.7 ( 139.8 )	5.11 ( 3.76 )	2.35 ( 1.84 )
Pulmonary Hypertension	40	4.58 ( 3.23 - 6.5 )	4.57 ( 88.27 )	3.82 ( 2.85 )	1.93 ( 1.44 )
Toxicity To Various Agents	38	0.91 ( 0.66 - 1.26 )	0.91 ( 0.32 )	0.92 ( 0.7 )	-0.13 ( -0.6 )
Ascites	38	1.66 ( 1.19 - 2.32 )	1.66 ( 9.11 )	1.6 ( 1.21 )	0.68 ( 0.2 )
Bronchopulmonary Aspergillosis	37	1.26 ( 0.9 - 1.76 )	1.26 ( 1.84 )	1.24 ( 0.94 )	0.31 ( -0.17 )
Pulmonary Haemorrhage	37	3.33 ( 2.34 - 4.74 )	3.32 ( 50.48 )	2.95 ( 2.2 )	1.56 ( 1.05 )
Renal Impairment	35	0.55 ( 0.39 - 0.77 )	0.55 ( 12.28 )	0.57 ( 0.43 )	-0.82 ( -1.31 )
Hepatic Failure	34	1.69 ( 1.19 - 2.4 )	1.69 ( 8.65 )	1.62 ( 1.21 )	0.7 ( 0.19 )
Dyspnoea	34	0.75 ( 0.53 - 1.06 )	0.75 ( 2.6 )	0.77 ( 0.57 )	-0.39 ( -0.88 )
Staphylococcal Sepsis	34	2.51 ( 1.75 - 3.6 )	2.51 ( 26.92 )	2.32 ( 1.71 )	1.21 ( 0.69 )
No Adverse Event	33	4.2 ( 2.87 - 6.14 )	4.19 ( 64.45 )	3.56 ( 2.59 )	1.83 ( 1.29 )
Obliterative Bronchiolitis	33	3.15 ( 2.17 - 4.57 )	3.15 ( 40.89 )	2.81 ( 2.06 )	1.49 ( 0.96 )
Herpes Simplex	33	2.3 ( 1.6 - 3.31 )	2.3 ( 21.33 )	2.14 ( 1.58 )	1.1 ( 0.58 )
Hypertension	33	0.56 ( 0.4 - 0.79 )	0.56 ( 10.96 )	0.58 ( 0.43 )	-0.8 ( -1.3 )
Human Herpesvirus 6 Infection	32	1.06 ( 0.74 - 1.51 )	1.06 ( 0.09 )	1.05 ( 0.78 )	0.07 ( -0.44 )
Respiratory Distress	31	1.95 ( 1.34 - 2.82 )	1.94 ( 12.81 )	1.85 ( 1.35 )	0.89 ( 0.35 )
Polyomavirus Viraemia	31	3.46 ( 2.35 - 5.09 )	3.45 ( 45 )	3.04 ( 2.2 )	1.61 ( 1.05 )
Epstein-Barr Viraemia	30	3.09 ( 2.09 - 4.55 )	3.08 ( 35.81 )	2.77 ( 2 )	1.47 ( 0.91 )
Seizure	30	1.56 ( 1.07 - 2.26 )	1.55 ( 5.45 )	1.51 ( 1.1 )	0.59 ( 0.05 )
Product Use Issue	30	1.02 ( 0.7 - 1.47 )	1.02 ( 0.01 )	1.02 ( 0.75 )	0.02 ( -0.51 )
Cardiac Failure	30	1.19 ( 0.82 - 1.72 )	1.19 ( 0.83 )	1.18 ( 0.86 )	0.23 ( -0.3 )
Bone Marrow Failure	28	1.55 ( 1.05 - 2.28 )	1.55 ( 5 )	1.5 ( 1.09 )	0.59 ( 0.03 )
Posterior Reversible Encephalopathy Syndrome	28	0.85 ( 0.58 - 1.24 )	0.85 ( 0.75 )	0.85 ( 0.62 )	-0.23 ( -0.78 )
Anaemia	28	0.51 ( 0.35 - 0.74 )	0.51 ( 13.11 )	0.52 ( 0.38 )	-0.94 ( -1.48 )
Product Administered To Patient Of Inappropriate Age	28	6.21 ( 4.03 - 9.56 )	6.19 ( 89.76 )	4.82 ( 3.36 )	2.27 ( 1.66 )
Interstitial Lung Disease	27	1.39 ( 0.94 - 2.05 )	1.39 ( 2.7 )	1.36 ( 0.98 )	0.44 ( -0.13 )
Platelet Count Decreased	27	0.95 ( 0.64 - 1.4 )	0.95 ( 0.07 )	0.95 ( 0.69 )	-0.07 ( -0.63 )
Blood Bilirubin Increased	27	1.18 ( 0.8 - 1.75 )	1.18 ( 0.71 )	1.17 ( 0.84 )	0.23 ( -0.34 )
Clostridium Difficile Colitis	27	1.85 ( 1.24 - 2.75 )	1.85 ( 9.51 )	1.77 ( 1.27 )	0.82 ( 0.25 )
Haemorrhage	26	1.9 ( 1.27 - 2.85 )	1.9 ( 10.01 )	1.81 ( 1.29 )	0.86 ( 0.27 )
Incorrect Product Administration Duration	26	56.19 ( 25.44 - 124.15 )	56.07 ( 330.94 )	13.96 ( 7.19 )	3.8 ( 3.06 )
Lung Disorder	25	1.59 ( 1.06 - 2.4 )	1.59 ( 5.04 )	1.54 ( 1.09 )	0.62 ( 0.03 )
Pericardial Effusion	25	1.44 ( 0.96 - 2.16 )	1.44 ( 3.08 )	1.4 ( 1 )	0.49 ( -0.1 )
Enterococcal Infection	25	1.59 ( 1.05 - 2.39 )	1.59 ( 4.96 )	1.54 ( 1.09 )	0.62 ( 0.03 )
Hepatic Function Abnormal	25	1.53 ( 1.02 - 2.31 )	1.53 ( 4.21 )	1.49 ( 1.06 )	0.57 ( -0.02 )
Acute Graft Versus Host Disease In Intestine	24	0.69 ( 0.46 - 1.04 )	0.69 ( 3.19 )	0.7 ( 0.5 )	-0.51 ( -1.1 )
Ovarian Failure	24	11.85 ( 7.05 - 19.93 )	11.83 ( 141.2 )	7.42 ( 4.81 )	2.89 ( 2.21 )
Blood Follicle Stimulating Hormone Increased	24	18.86 ( 10.57 - 33.64 )	18.82 ( 193.72 )	9.52 ( 5.87 )	3.25 ( 2.54 )
Pneumonitis	23	1.81 ( 1.18 - 2.79 )	1.81 ( 7.58 )	1.73 ( 1.21 )	0.79 ( 0.18 )
Progressive Multifocal Leukoencephalopathy	23	1.79 ( 1.16 - 2.75 )	1.79 ( 7.24 )	1.71 ( 1.2 )	0.78 ( 0.16 )
Idiopathic Pneumonia Syndrome	23	4.57 ( 2.88 - 7.24 )	4.56 ( 50.6 )	3.82 ( 2.6 )	1.93 ( 1.28 )
Candida Infection	23	1.82 ( 1.18 - 2.8 )	1.82 ( 7.7 )	1.74 ( 1.22 )	0.8 ( 0.18 )
Cough	23	0.79 ( 0.52 - 1.21 )	0.8 ( 1.16 )	0.8 ( 0.57 )	-0.31 ( -0.92 )
Aspergillus Infection	23	0.97 ( 0.64 - 1.47 )	0.97 ( 0.02 )	0.97 ( 0.68 )	-0.04 ( -0.65 )
Pain	22	0.8 ( 0.52 - 1.23 )	0.8 ( 1.07 )	0.81 ( 0.56 )	-0.31 ( -0.92 )
Haematuria	22	1.46 ( 0.94 - 2.26 )	1.46 ( 2.94 )	1.42 ( 0.99 )	0.51 ( -0.12 )
Pneumonia Bacterial	22	2.21 ( 1.42 - 3.44 )	2.21 ( 12.88 )	2.07 ( 1.43 )	1.05 ( 0.41 )
Stem Cell Transplant	22	1.79 ( 1.15 - 2.78 )	1.79 ( 6.96 )	1.72 ( 1.19 )	0.78 ( 0.15 )
Blood Luteinising Hormone Increased	22	25.35 ( 13.15 - 48.88 )	25.3 ( 208.23 )	10.85 ( 6.27 )	3.44 ( 2.68 )
Pulmonary Oedema	21	1.24 ( 0.8 - 1.93 )	1.24 ( 0.92 )	1.22 ( 0.85 )	0.29 ( -0.34 )
Bacterial Sepsis	20	1.49 ( 0.94 - 2.35 )	1.49 ( 2.94 )	1.45 ( 0.99 )	0.53 ( -0.12 )
Rash	20	0.64 ( 0.41 - 0.99 )	0.64 ( 4.01 )	0.65 ( 0.45 )	-0.62 ( -1.26 )
Pulmonary Alveolar Haemorrhage	20	2.24 ( 1.41 - 3.57 )	2.24 ( 12.17 )	2.1 ( 1.42 )	1.07 ( 0.4 )
Stenotrophomonas Infection	20	3.6 ( 2.22 - 5.83 )	3.59 ( 31.01 )	3.15 ( 2.1 )	1.65 ( 0.97 )
Haemorrhage Intracranial	20	3.53 ( 2.18 - 5.7 )	3.52 ( 30 )	3.09 ( 2.07 )	1.63 ( 0.95 )
Bone Marrow Transplant	20	3.93 ( 2.42 - 6.38 )	3.92 ( 35.48 )	3.38 ( 2.25 )	1.76 ( 1.07 )
Toxoplasmosis	20	3.06 ( 1.9 - 4.92 )	3.05 ( 23.48 )	2.74 ( 1.84 )	1.46 ( 0.78 )
Ovarian Atrophy	20	115.21 ( 34.23 - 387.78 )	115.01 ( 294.87 )	15.87 ( 5.75 )	3.99 ( 3.13 )
Transplantation Complication	19	10.94 ( 6.16 - 19.45 )	10.93 ( 104.93 )	7.08 ( 4.37 )	2.82 ( 2.06 )
Respiratory Disorder	19	2.13 ( 1.32 - 3.43 )	2.13 ( 10.13 )	2 ( 1.34 )	1 ( 0.32 )
Liver Disorder	19	1.4 ( 0.87 - 2.23 )	1.39 ( 1.97 )	1.37 ( 0.92 )	0.45 ( -0.22 )
Staphylococcal Bacteraemia	19	2.13 ( 1.32 - 3.43 )	2.13 ( 10.13 )	2 ( 1.34 )	1 ( 0.32 )
Premature Menopause	19	13.13 ( 7.23 - 23.85 )	13.11 ( 120.8 )	7.88 ( 4.78 )	2.98 ( 2.2 )
Fungal Infection	19	0.86 ( 0.54 - 1.37 )	0.86 ( 0.4 )	0.87 ( 0.59 )	-0.2 ( -0.86 )
Cytomegalovirus Test Positive	18	1.3 ( 0.8 - 2.1 )	1.3 ( 1.16 )	1.28 ( 0.86 )	0.35 ( -0.33 )
Hypotension	18	0.56 ( 0.35 - 0.9 )	0.56 ( 6.02 )	0.57 ( 0.39 )	-0.8 ( -1.47 )
Nephropathy Toxic	18	0.81 ( 0.5 - 1.29 )	0.81 ( 0.8 )	0.82 ( 0.55 )	-0.29 ( -0.97 )
Pneumonia Fungal	18	2.14 ( 1.31 - 3.5 )	2.14 ( 9.75 )	2.02 ( 1.34 )	1.01 ( 0.31 )
Transplant Rejection	18	0.17 ( 0.11 - 0.27 )	0.17 ( 73 )	0.18 ( 0.12 )	-2.49 ( -3.16 )
Weight Increased	18	1.02 ( 0.63 - 1.64 )	1.02 ( 0.01 )	1.02 ( 0.68 )	0.02 ( -0.66 )
Coagulopathy	18	2.7 ( 1.64 - 4.44 )	2.7 ( 16.67 )	2.47 ( 1.63 )	1.3 ( 0.6 )
Disseminated Intravascular Coagulation	18	1.49 ( 0.92 - 2.42 )	1.49 ( 2.7 )	1.45 ( 0.97 )	0.54 ( -0.15 )
Decreased Appetite	18	0.89 ( 0.56 - 1.44 )	0.89 ( 0.21 )	0.9 ( 0.61 )	-0.15 ( -0.83 )
Cytopenia	18	1.19 ( 0.74 - 1.93 )	1.19 ( 0.53 )	1.18 ( 0.79 )	0.24 ( -0.44 )
Hypothyroidism	18	4.32 ( 2.58 - 7.24 )	4.31 ( 36.66 )	3.65 ( 2.37 )	1.87 ( 1.14 )
Jc Virus Infection	18	3.08 ( 1.86 - 5.08 )	3.07 ( 21.4 )	2.76 ( 1.81 )	1.47 ( 0.75 )
Pneumocystis Jirovecii Pneumonia	18	0.91 ( 0.56 - 1.45 )	0.91 ( 0.17 )	0.91 ( 0.61 )	-0.14 ( -0.82 )
Pneumonia Cytomegaloviral	18	1.37 ( 0.85 - 2.21 )	1.37 ( 1.65 )	1.34 ( 0.9 )	0.42 ( -0.26 )
Cytomegalovirus Chorioretinitis	18	2.55 ( 1.55 - 4.18 )	2.55 ( 14.73 )	2.35 ( 1.55 )	1.23 ( 0.53 )
Disease Recurrence	17	0.88 ( 0.54 - 1.43 )	0.88 ( 0.29 )	0.88 ( 0.59 )	-0.18 ( -0.88 )
Bacterial Infection	17	0.96 ( 0.59 - 1.57 )	0.96 ( 0.02 )	0.96 ( 0.64 )	-0.05 ( -0.75 )
Mucormycosis	17	1.54 ( 0.94 - 2.52 )	1.54 ( 2.92 )	1.49 ( 0.98 )	0.58 ( -0.13 )
Drug Effective For Unapproved Indication	17	3.67 ( 2.17 - 6.2 )	3.67 ( 27.2 )	3.2 ( 2.06 )	1.68 ( 0.94 )
Immune Thrombocytopenia	17	3.97 ( 2.34 - 6.72 )	3.96 ( 30.64 )	3.41 ( 2.19 )	1.77 ( 1.03 )
Right Ventricular Failure	17	8.9 ( 4.96 - 15.98 )	8.89 ( 78.56 )	6.21 ( 3.8 )	2.63 ( 1.84 )
Fatigue	16	0.53 ( 0.32 - 0.86 )	0.53 ( 6.66 )	0.54 ( 0.36 )	-0.89 ( -1.6 )
Inappropriate Schedule Of Product Administration	16	7.27 ( 4.05 - 13.05 )	7.26 ( 60.83 )	5.41 ( 3.32 )	2.44 ( 1.63 )
Epstein-Barr Virus Associated Lymphoproliferative Disorder	16	1.01 ( 0.61 - 1.67 )	1.01 ( 0 )	1.01 ( 0.66 )	0.02 ( -0.71 )
Human Herpesvirus 6 Encephalitis	16	6.14 ( 3.47 - 10.87 )	6.13 ( 50.73 )	4.79 ( 2.97 )	2.26 ( 1.47 )
Bone Marrow Transplant Rejection	15	2.4 ( 1.4 - 4.12 )	2.4 ( 10.72 )	2.23 ( 1.42 )	1.15 ( 0.39 )
Toxic Skin Eruption	15	7.4 ( 4.04 - 13.56 )	7.39 ( 58.07 )	5.48 ( 3.3 )	2.45 ( 1.63 )
Pulmonary Veno-Occlusive Disease	15	9.25 ( 4.94 - 17.33 )	9.24 ( 71.81 )	6.37 ( 3.77 )	2.67 ( 1.83 )
Neutropenic Colitis	15	3.08 ( 1.78 - 5.34 )	3.08 ( 17.89 )	2.77 ( 1.75 )	1.47 ( 0.69 )
Pseudomonas Infection	15	0.85 ( 0.51 - 1.43 )	0.85 ( 0.37 )	0.86 ( 0.56 )	-0.22 ( -0.96 )
General Physical Health Deterioration	15	0.82 ( 0.49 - 1.38 )	0.82 ( 0.56 )	0.83 ( 0.54 )	-0.27 ( -1.01 )
Klebsiella Infection	15	1.1 ( 0.65 - 1.85 )	1.1 ( 0.12 )	1.09 ( 0.7 )	0.13 ( -0.62 )
Myelodysplastic Syndrome	15	0.58 ( 0.35 - 0.97 )	0.58 ( 4.45 )	0.59 ( 0.39 )	-0.75 ( -1.49 )
Clostridium Difficile Infection	15	1.66 ( 0.98 - 2.82 )	1.66 ( 3.58 )	1.6 ( 1.03 )	0.68 ( -0.08 )
Hepatotoxicity	14	1.3 ( 0.75 - 2.24 )	1.3 ( 0.89 )	1.28 ( 0.81 )	0.35 ( -0.42 )
Second Primary Malignancy	14	2.84 ( 1.62 - 5.01 )	2.84 ( 14.35 )	2.58 ( 1.61 )	1.37 ( 0.57 )
Pulmonary Toxicity	14	2.66 ( 1.51 - 4.66 )	2.65 ( 12.51 )	2.43 ( 1.52 )	1.28 ( 0.49 )
Cystitis Viral	14	1.98 ( 1.14 - 3.45 )	1.98 ( 6.09 )	1.88 ( 1.18 )	0.91 ( 0.12 )
Cerebral Toxoplasmosis	14	2.44 ( 1.39 - 4.27 )	2.44 ( 10.43 )	2.26 ( 1.42 )	1.18 ( 0.38 )
Rhinovirus Infection	14	1.92 ( 1.1 - 3.33 )	1.92 ( 5.53 )	1.83 ( 1.15 )	0.87 ( 0.08 )
Hyperbilirubinaemia	13	1.41 ( 0.8 - 2.48 )	1.41 ( 1.44 )	1.38 ( 0.86 )	0.46 ( -0.34 )
Cerebral Haemorrhage	13	1.1 ( 0.63 - 1.94 )	1.1 ( 0.12 )	1.1 ( 0.69 )	0.14 ( -0.66 )
Hepatic Necrosis	13	3.3 ( 1.82 - 5.98 )	3.3 ( 17.48 )	2.93 ( 1.78 )	1.55 ( 0.72 )
Viral Infection	13	1.06 ( 0.61 - 1.86 )	1.06 ( 0.05 )	1.06 ( 0.66 )	0.08 ( -0.71 )
Condition Aggravated	13	0.31 ( 0.18 - 0.54 )	0.31 ( 19.45 )	0.32 ( 0.2 )	-1.63 ( -2.4 )
Enterococcal Bacteraemia	13	3.87 ( 2.12 - 7.06 )	3.87 ( 22.58 )	3.34 ( 2.02 )	1.74 ( 0.9 )
Organising Pneumonia	13	1.38 ( 0.79 - 2.44 )	1.38 ( 1.29 )	1.36 ( 0.84 )	0.44 ( -0.36 )
Escherichia Infection	13	0.99 ( 0.57 - 1.74 )	0.99 ( 0 )	0.99 ( 0.62 )	-0.01 ( -0.8 )
Cellulitis	13	1.17 ( 0.67 - 2.06 )	1.17 ( 0.31 )	1.16 ( 0.73 )	0.22 ( -0.58 )
Primary Hypogonadism	13	8.31 ( 4.29 - 16.12 )	8.31 ( 56.41 )	5.93 ( 3.41 )	2.57 ( 1.67 )
Encephalitis	13	1.41 ( 0.8 - 2.48 )	1.41 ( 1.44 )	1.38 ( 0.86 )	0.46 ( -0.34 )
Bronchiolitis Obliterans Syndrome	13	11.82 ( 5.83 - 23.93 )	11.8 ( 76.34 )	7.41 ( 4.11 )	2.89 ( 1.97 )
Covid-19	13	0.23 ( 0.13 - 0.4 )	0.23 ( 32.62 )	0.24 ( 0.15 )	-2.04 ( -2.82 )
Erythema	12	1.15 ( 0.64 - 2.06 )	1.15 ( 0.22 )	1.14 ( 0.7 )	0.19 ( -0.64 )
Drug Interaction	12	0.19 ( 0.11 - 0.33 )	0.19 ( 41.17 )	0.2 ( 0.12 )	-2.33 ( -3.13 )
Transaminases Increased	12	1.39 ( 0.77 - 2.5 )	1.39 ( 1.21 )	1.36 ( 0.83 )	0.44 ( -0.39 )
Headache	12	0.29 ( 0.16 - 0.51 )	0.29 ( 20.7 )	0.3 ( 0.19 )	-1.73 ( -2.54 )
Cystitis	12	2.09 ( 1.15 - 3.81 )	2.09 ( 6.1 )	1.97 ( 1.19 )	0.98 ( 0.13 )
Cardiac Arrest	12	0.74 ( 0.41 - 1.32 )	0.74 ( 1.06 )	0.75 ( 0.46 )	-0.41 ( -1.23 )
Pulmonary Arterial Hypertension	12	3.45 ( 1.86 - 6.42 )	3.45 ( 17.41 )	3.04 ( 1.81 )	1.61 ( 0.74 )
Disease Progression	12	0.42 ( 0.24 - 0.74 )	0.42 ( 9.41 )	0.43 ( 0.27 )	-1.21 ( -2.02 )
Engraftment Syndrome	12	0.87 ( 0.49 - 1.55 )	0.87 ( 0.22 )	0.88 ( 0.54 )	-0.19 ( -1.01 )
Mucosal Disorder	12	23.03 ( 9.7 - 54.66 )	23 ( 108.25 )	10.43 ( 5.06 )	3.38 ( 2.37 )
Adenoviral Haemorrhagic Cystitis	12	3.77 ( 2.02 - 7.04 )	3.76 ( 20 )	3.27 ( 1.94 )	1.71 ( 0.84 )
Rectal Haemorrhage	12	5.76 ( 2.99 - 11.07 )	5.75 ( 35.33 )	4.56 ( 2.64 )	2.19 ( 1.29 )
Acute Myeloid Leukaemia Recurrent	12	0.95 ( 0.53 - 1.71 )	0.95 ( 0.03 )	0.96 ( 0.59 )	-0.06 ( -0.89 )
Cardiotoxicity	11	1.94 ( 1.04 - 3.61 )	1.94 ( 4.48 )	1.84 ( 1.09 )	0.88 ( 0 )
Hepatic Enzyme Increased	11	1.04 ( 0.57 - 1.92 )	1.04 ( 0.02 )	1.04 ( 0.63 )	0.06 ( -0.8 )
Hallucination	11	1.84 ( 0.99 - 3.43 )	1.84 ( 3.83 )	1.76 ( 1.05 )	0.82 ( -0.06 )
Melaena	11	1.84 ( 0.99 - 3.43 )	1.84 ( 3.83 )	1.76 ( 1.05 )	0.82 ( -0.06 )
Acute Myeloid Leukaemia	11	0.5 ( 0.28 - 0.92 )	0.5 ( 5.25 )	0.52 ( 0.31 )	-0.95 ( -1.8 )
Device Related Infection	11	1.2 ( 0.65 - 2.21 )	1.2 ( 0.35 )	1.19 ( 0.71 )	0.25 ( -0.61 )
Hypogammaglobulinaemia	11	0.93 ( 0.51 - 1.71 )	0.93 ( 0.05 )	0.93 ( 0.56 )	-0.1 ( -0.95 )
Skin Lesion	11	1.49 ( 0.81 - 2.77 )	1.49 ( 1.66 )	1.45 ( 0.87 )	0.54 ( -0.33 )
Atrial Flutter	11	3.58 ( 1.87 - 6.86 )	3.58 ( 16.95 )	3.14 ( 1.82 )	1.65 ( 0.74 )
Gastrointestinal Toxicity	11	2.6 ( 1.38 - 4.9 )	2.6 ( 9.41 )	2.39 ( 1.41 )	1.26 ( 0.37 )
Intentional Product Use Issue	11	0.36 ( 0.2 - 0.65 )	0.36 ( 12.58 )	0.37 ( 0.22 )	-1.44 ( -2.28 )
Altered State Of Consciousness	11	1.41 ( 0.76 - 2.6 )	1.41 ( 1.19 )	1.38 ( 0.82 )	0.46 ( -0.41 )
Inappropriate Antidiuretic Hormone Secretion	11	2.09 ( 1.12 - 3.9 )	2.09 ( 5.55 )	1.97 ( 1.17 )	0.98 ( 0.1 )
Encephalitis Viral	10	1.01 ( 0.54 - 1.92 )	1.01 ( 0 )	1.01 ( 0.59 )	0.02 ( -0.88 )
Engraft Failure	10	1.41 ( 0.74 - 2.7 )	1.41 ( 1.12 )	1.38 ( 0.81 )	0.47 ( -0.44 )
Graft Versus Host Disease In Liver	10	0.88 ( 0.46 - 1.65 )	0.88 ( 0.17 )	0.88 ( 0.52 )	-0.18 ( -1.07 )
Tachycardia	10	0.59 ( 0.31 - 1.1 )	0.59 ( 2.82 )	0.6 ( 0.35 )	-0.74 ( -1.62 )
Chronic Graft Versus Host Disease In Skin	10	0.53 ( 0.28 - 0.99 )	0.53 ( 4.11 )	0.54 ( 0.32 )	-0.88 ( -1.77 )
White Blood Cell Count Decreased	10	0.47 ( 0.25 - 0.88 )	0.47 ( 5.83 )	0.48 ( 0.29 )	-1.05 ( -1.93 )
Colitis	10	0.73 ( 0.39 - 1.37 )	0.73 ( 0.98 )	0.74 ( 0.44 )	-0.44 ( -1.33 )
Evans Syndrome	10	10.79 ( 4.9 - 23.78 )	10.78 ( 54.62 )	7.02 ( 3.62 )	2.81 ( 1.78 )
Disseminated Tuberculosis	10	3.67 ( 1.86 - 7.27 )	3.67 ( 16.03 )	3.2 ( 1.81 )	1.68 ( 0.73 )
Gamma-Glutamyltransferase Increased	10	1.03 ( 0.54 - 1.94 )	1.03 ( 0.01 )	1.03 ( 0.6 )	0.04 ( -0.86 )
Encephalopathy	10	0.43 ( 0.23 - 0.8 )	0.43 ( 7.42 )	0.44 ( 0.26 )	-1.17 ( -2.06 )
Generalised Oedema	10	1.82 ( 0.95 - 3.49 )	1.82 ( 3.32 )	1.74 ( 1.01 )	0.8 ( -0.12 )
Upper Gastrointestinal Haemorrhage	10	4.01 ( 2.02 - 7.99 )	4.01 ( 18.35 )	3.44 ( 1.94 )	1.78 ( 0.83 )
Pneumonia Viral	10	2.3 ( 1.19 - 4.45 )	2.3 ( 6.49 )	2.15 ( 1.24 )	1.1 ( 0.18 )
Agranulocytosis	10	0.83 ( 0.44 - 1.56 )	0.83 ( 0.35 )	0.83 ( 0.49 )	-0.26 ( -1.15 )
Confusional State	10	0.4 ( 0.21 - 0.75 )	0.4 ( 8.9 )	0.41 ( 0.24 )	-1.28 ( -2.16 )
Gastrointestinal Infection	10	2.43 ( 1.25 - 4.71 )	2.43 ( 7.38 )	2.25 ( 1.29 )	1.17 ( 0.25 )
Bradycardia	10	2.03 ( 1.05 - 3.91 )	2.03 ( 4.68 )	1.92 ( 1.11 )	0.94 ( 0.02 )
Hypoalbuminaemia	10	1.74 ( 0.91 - 3.34 )	1.74 ( 2.88 )	1.67 ( 0.97 )	0.74 ( -0.17 )
Skin Hyperpigmentation	10	5.08 ( 2.51 - 10.28 )	5.07 ( 25.28 )	4.15 ( 2.3 )	2.05 ( 1.08 )
Escherichia Test Positive	10	13.28 ( 5.82 - 30.3 )	13.27 ( 64.14 )	7.94 ( 3.98 )	2.99 ( 1.94 )
Viruria	10	4.21 ( 2.11 - 8.41 )	4.21 ( 19.66 )	3.58 ( 2.01 )	1.84 ( 0.88 )
Shock Haemorrhagic	9	1.55 ( 0.78 - 3.07 )	1.55 ( 1.63 )	1.51 ( 0.85 )	0.59 ( -0.36 )
Klebsiella Sepsis	9	2.04 ( 1.02 - 4.08 )	2.04 ( 4.29 )	1.93 ( 1.08 )	0.95 ( -0.01 )
Neutrophil Count Decreased	9	0.9 ( 0.46 - 1.75 )	0.9 ( 0.1 )	0.9 ( 0.52 )	-0.15 ( -1.09 )
Oropharyngeal Pain	9	1.69 ( 0.85 - 3.35 )	1.69 ( 2.3 )	1.63 ( 0.92 )	0.7 ( -0.25 )
Dehydration	9	0.45 ( 0.23 - 0.87 )	0.45 ( 5.86 )	0.47 ( 0.27 )	-1.1 ( -2.03 )
Enterobacter Bacteraemia	9	11.1 ( 4.8 - 25.65 )	11.09 ( 50.3 )	7.14 ( 3.54 )	2.84 ( 1.75 )
Escherichia Sepsis	9	1.69 ( 0.85 - 3.35 )	1.69 ( 2.3 )	1.63 ( 0.92 )	0.7 ( -0.25 )
Alanine Aminotransferase Increased	9	0.38 ( 0.19 - 0.73 )	0.38 ( 9.09 )	0.39 ( 0.22 )	-1.36 ( -2.28 )
Lung Consolidation	9	2.02 ( 1.01 - 4.02 )	2.02 ( 4.13 )	1.91 ( 1.07 )	0.93 ( -0.03 )
Hepatic Cytolysis	9	2.16 ( 1.08 - 4.32 )	2.16 ( 4.96 )	2.03 ( 1.14 )	1.02 ( 0.05 )
Infection Reactivation	9	1.57 ( 0.79 - 3.1 )	1.57 ( 1.7 )	1.52 ( 0.86 )	0.61 ( -0.35 )
Abdominal Pain	9	0.25 ( 0.13 - 0.48 )	0.25 ( 19.91 )	0.26 ( 0.15 )	-1.93 ( -2.85 )
Pneumothorax	9	1.44 ( 0.73 - 2.84 )	1.44 ( 1.11 )	1.4 ( 0.79 )	0.49 ( -0.46 )
Hyperkalaemia	9	0.66 ( 0.34 - 1.29 )	0.66 ( 1.48 )	0.68 ( 0.39 )	-0.56 ( -1.5 )
Lymphopenia	9	0.65 ( 0.34 - 1.27 )	0.65 ( 1.61 )	0.67 ( 0.38 )	-0.59 ( -1.52 )
Aplasia Pure Red Cell	9	1.24 ( 0.63 - 2.44 )	1.24 ( 0.4 )	1.23 ( 0.7 )	0.29 ( -0.65 )
Varicella Zoster Virus Infection	9	1.06 ( 0.54 - 2.07 )	1.06 ( 0.03 )	1.05 ( 0.6 )	0.07 ( -0.87 )
Guillain-Barre Syndrome	9	1.37 ( 0.7 - 2.71 )	1.37 ( 0.85 )	1.35 ( 0.76 )	0.43 ( -0.52 )
Transplant Dysfunction	9	0.46 ( 0.24 - 0.89 )	0.46 ( 5.63 )	0.47 ( 0.27 )	-1.08 ( -2.01 )
Enteritis	9	1.6 ( 0.81 - 3.17 )	1.6 ( 1.86 )	1.55 ( 0.87 )	0.63 ( -0.32 )
Cholestasis	8	0.66 ( 0.33 - 1.34 )	0.66 ( 1.32 )	0.68 ( 0.37 )	-0.56 ( -1.55 )
Pneumonia Klebsiella	8	1.42 ( 0.69 - 2.93 )	1.42 ( 0.93 )	1.39 ( 0.76 )	0.48 ( -0.53 )
Candida Sepsis	8	2.3 ( 1.1 - 4.81 )	2.3 ( 5.19 )	2.15 ( 1.16 )	1.1 ( 0.08 )
Viraemia	8	0.79 ( 0.39 - 1.61 )	0.79 ( 0.41 )	0.8 ( 0.44 )	-0.32 ( -1.3 )
Haematemesis	8	2.3 ( 1.1 - 4.81 )	2.3 ( 5.19 )	2.15 ( 1.16 )	1.1 ( 0.08 )
Pruritus	8	0.63 ( 0.31 - 1.27 )	0.63 ( 1.71 )	0.64 ( 0.35 )	-0.64 ( -1.62 )
Mouth Ulceration	8	1.17 ( 0.57 - 2.39 )	1.17 ( 0.18 )	1.16 ( 0.64 )	0.21 ( -0.78 )
Pseudomonal Sepsis	8	1.29 ( 0.63 - 2.65 )	1.29 ( 0.49 )	1.27 ( 0.7 )	0.34 ( -0.65 )
Encephalitis Cytomegalovirus	8	2.61 ( 1.24 - 5.48 )	2.6 ( 6.87 )	2.39 ( 1.28 )	1.26 ( 0.23 )
Atrial Fibrillation	8	0.41 ( 0.2 - 0.82 )	0.41 ( 6.76 )	0.42 ( 0.23 )	-1.25 ( -2.22 )
Herpes Zoster	8	0.33 ( 0.17 - 0.67 )	0.33 ( 10.38 )	0.35 ( 0.19 )	-1.52 ( -2.5 )
Staphylococcus Test Positive	8	7.67 ( 3.34 - 17.65 )	7.67 ( 32.12 )	5.62 ( 2.8 )	2.49 ( 1.38 )
Hilar Lymphadenopathy	8	15.35 ( 5.92 - 39.78 )	15.34 ( 56.76 )	8.59 ( 3.87 )	3.1 ( 1.92 )
Lymphadenopathy Mediastinal	8	7.67 ( 3.34 - 17.65 )	7.67 ( 32.12 )	5.62 ( 2.8 )	2.49 ( 1.38 )
Aspartate Aminotransferase Increased	8	0.39 ( 0.19 - 0.79 )	0.39 ( 7.48 )	0.4 ( 0.22 )	-1.31 ( -2.28 )
Neurotoxicity	8	0.38 ( 0.19 - 0.77 )	0.38 ( 7.82 )	0.4 ( 0.22 )	-1.34 ( -2.31 )
Hepatomegaly	8	1.11 ( 0.54 - 2.28 )	1.11 ( 0.09 )	1.11 ( 0.61 )	0.15 ( -0.85 )
Oedema	8	0.52 ( 0.26 - 1.06 )	0.52 ( 3.39 )	0.54 ( 0.3 )	-0.9 ( -1.88 )
Myelosuppression	8	1.23 ( 0.6 - 2.53 )	1.23 ( 0.33 )	1.22 ( 0.67 )	0.28 ( -0.71 )
Hepatitis	8	1.24 ( 0.61 - 2.55 )	1.24 ( 0.36 )	1.23 ( 0.67 )	0.3 ( -0.7 )
Systemic Mycosis	8	1.39 ( 0.68 - 2.87 )	1.39 ( 0.83 )	1.36 ( 0.75 )	0.45 ( -0.55 )
Human Polyomavirus Infection	8	1.5 ( 0.73 - 3.09 )	1.5 ( 1.23 )	1.46 ( 0.8 )	0.55 ( -0.46 )
Circulatory Collapse	8	1.62 ( 0.79 - 3.35 )	1.62 ( 1.75 )	1.57 ( 0.86 )	0.65 ( -0.36 )
Epistaxis	8	1.35 ( 0.66 - 2.78 )	1.35 ( 0.68 )	1.33 ( 0.73 )	0.41 ( -0.59 )
Pulmonary Embolism	8	0.64 ( 0.31 - 1.29 )	0.64 ( 1.61 )	0.65 ( 0.36 )	-0.62 ( -1.6 )
Pneumonia Staphylococcal	8	2.51 ( 1.2 - 5.27 )	2.51 ( 6.34 )	2.32 ( 1.25 )	1.21 ( 0.19 )
Haemoglobin Decreased	8	0.28 ( 0.14 - 0.57 )	0.28 ( 14.35 )	0.29 ( 0.16 )	-1.76 ( -2.73 )
Pathogen Resistance	8	1.1 ( 0.54 - 2.26 )	1.1 ( 0.07 )	1.1 ( 0.6 )	0.13 ( -0.86 )
Pulmonary Tuberculosis	8	4.06 ( 1.88 - 8.78 )	4.06 ( 14.93 )	3.48 ( 1.82 )	1.8 ( 0.74 )
Hypoxia	8	0.41 ( 0.2 - 0.83 )	0.41 ( 6.57 )	0.43 ( 0.24 )	-1.23 ( -2.21 )
Capillary Leak Syndrome	8	1.45 ( 0.71 - 2.99 )	1.45 ( 1.04 )	1.42 ( 0.77 )	0.5 ( -0.5 )
Lower Gastrointestinal Haemorrhage	8	4.32 ( 1.99 - 9.37 )	4.31 ( 16.29 )	3.65 ( 1.91 )	1.87 ( 0.81 )
Cytokine Release Syndrome	8	0.24 ( 0.12 - 0.48 )	0.24 ( 19.42 )	0.25 ( 0.14 )	-2.01 ( -2.98 )
Haemodialysis	8	0.72 ( 0.35 - 1.46 )	0.72 ( 0.85 )	0.73 ( 0.4 )	-0.45 ( -1.44 )
Metastasis	7	2.37 ( 1.07 - 5.22 )	2.37 ( 4.87 )	2.2 ( 1.14 )	1.14 ( 0.05 )
Pericarditis	7	1.3 ( 0.6 - 2.8 )	1.3 ( 0.45 )	1.28 ( 0.67 )	0.35 ( -0.71 )
Pericarditis Constrictive	7	6.71 ( 2.8 - 16.07 )	6.71 ( 24.49 )	5.11 ( 2.46 )	2.35 ( 1.19 )
Brain Abscess	7	1.57 ( 0.72 - 3.4 )	1.57 ( 1.32 )	1.52 ( 0.8 )	0.61 ( -0.46 )
Obstructive Airways Disorder	7	3.02 ( 1.35 - 6.74 )	3.02 ( 8.05 )	2.72 ( 1.39 )	1.44 ( 0.34 )
Hyponatraemia	7	0.46 ( 0.22 - 0.98 )	0.46 ( 4.21 )	0.48 ( 0.26 )	-1.06 ( -2.1 )
Dermatitis Bullous	7	4.65 ( 2.02 - 10.71 )	4.64 ( 15.78 )	3.87 ( 1.93 )	1.95 ( 0.82 )
Leukaemia Recurrent	7	0.69 ( 0.32 - 1.46 )	0.69 ( 0.97 )	0.7 ( 0.37 )	-0.52 ( -1.56 )
Respiratory Syncytial Virus Infection	7	1.01 ( 0.47 - 2.16 )	1.01 ( 0 )	1.01 ( 0.53 )	0.01 ( -1.04 )
Hepatocellular Injury	7	1.04 ( 0.49 - 2.23 )	1.04 ( 0.01 )	1.04 ( 0.55 )	0.05 ( -1 )
Rash Maculo-Papular	7	0.94 ( 0.44 - 2.02 )	0.94 ( 0.02 )	0.95 ( 0.5 )	-0.08 ( -1.13 )
Meningitis Tuberculous	7	5.25 ( 2.25 - 12.24 )	5.25 ( 18.47 )	4.26 ( 2.1 )	2.09 ( 0.95 )
Squamous Cell Carcinoma	7	0.86 ( 0.4 - 1.83 )	0.86 ( 0.16 )	0.86 ( 0.46 )	-0.21 ( -1.26 )
Laryngitis Fungal	7	7.11 ( 2.95 - 17.14 )	7.1 ( 26.01 )	5.32 ( 2.55 )	2.41 ( 1.24 )
Influenza	7	0.55 ( 0.26 - 1.17 )	0.55 ( 2.48 )	0.57 ( 0.3 )	-0.82 ( -1.86 )
Cholecystitis	7	2.32 ( 1.06 - 5.12 )	2.32 ( 4.65 )	2.17 ( 1.12 )	1.11 ( 0.03 )
Oedema Peripheral	7	0.35 ( 0.17 - 0.75 )	0.35 ( 8.09 )	0.37 ( 0.2 )	-1.45 ( -2.48 )
Basal Cell Carcinoma	7	0.69 ( 0.32 - 1.47 )	0.69 ( 0.94 )	0.7 ( 0.37 )	-0.51 ( -1.55 )
Pyelonephritis	7	0.88 ( 0.41 - 1.88 )	0.88 ( 0.11 )	0.89 ( 0.47 )	-0.17 ( -1.22 )
Streptococcal Bacteraemia	7	1.95 ( 0.89 - 4.26 )	1.95 ( 2.9 )	1.85 ( 0.96 )	0.89 ( -0.19 )
Cardiac Tamponade	7	1.27 ( 0.59 - 2.74 )	1.27 ( 0.38 )	1.25 ( 0.66 )	0.32 ( -0.73 )
Product Administration Error	7	6.71 ( 2.8 - 16.07 )	6.71 ( 24.49 )	5.11 ( 2.46 )	2.35 ( 1.19 )
Chronic Kidney Disease	7	0.34 ( 0.16 - 0.71 )	0.34 ( 9 )	0.35 ( 0.19 )	-1.52 ( -2.55 )
Acute Hepatic Failure	7	1.33 ( 0.62 - 2.86 )	1.33 ( 0.52 )	1.3 ( 0.69 )	0.38 ( -0.68 )
Systemic Candida	7	1.17 ( 0.55 - 2.52 )	1.17 ( 0.17 )	1.16 ( 0.61 )	0.22 ( -0.84 )
Epilepsy	7	1.2 ( 0.56 - 2.57 )	1.2 ( 0.21 )	1.18 ( 0.62 )	0.24 ( -0.81 )
Cardiac Failure Congestive	7	0.73 ( 0.34 - 1.56 )	0.73 ( 0.66 )	0.74 ( 0.39 )	-0.43 ( -1.47 )
Cardiomyopathy	7	1.04 ( 0.49 - 2.23 )	1.04 ( 0.01 )	1.04 ( 0.55 )	0.05 ( -1 )
Escherichia Bacteraemia	7	1.75 ( 0.8 - 3.81 )	1.75 ( 2.04 )	1.68 ( 0.88 )	0.75 ( -0.32 )
Bronchiectasis	7	1.65 ( 0.76 - 3.59 )	1.65 ( 1.65 )	1.6 ( 0.83 )	0.68 ( -0.39 )
Enterobacter Sepsis	7	3.9 ( 1.72 - 8.85 )	3.9 ( 12.29 )	3.36 ( 1.69 )	1.75 ( 0.63 )
Blood Pressure Decreased	7	0.8 ( 0.37 - 1.71 )	0.8 ( 0.34 )	0.81 ( 0.43 )	-0.31 ( -1.35 )
Growth Hormone Deficiency	7	10.07 ( 3.96 - 25.58 )	10.06 ( 36.09 )	6.72 ( 3.08 )	2.75 ( 1.54 )
Acute Graft Versus Host Disease In Liver	7	0.42 ( 0.2 - 0.89 )	0.42 ( 5.5 )	0.43 ( 0.23 )	-1.21 ( -2.24 )
Nephrotic Syndrome	7	1.02 ( 0.48 - 2.19 )	1.02 ( 0 )	1.02 ( 0.54 )	0.03 ( -1.02 )
Herpes Virus Infection	7	1.16 ( 0.54 - 2.5 )	1.16 ( 0.15 )	1.15 ( 0.61 )	0.2 ( -0.85 )
Dermatitis	7	2.57 ( 1.16 - 5.69 )	2.57 ( 5.84 )	2.37 ( 1.22 )	1.24 ( 0.15 )
Cardiac Dysfunction	7	15.1 ( 5.48 - 41.66 )	15.1 ( 49.14 )	8.52 ( 3.64 )	3.09 ( 1.84 )
Autoimmune Thyroiditis	7	3.66 ( 1.62 - 8.28 )	3.66 ( 11.16 )	3.19 ( 1.61 )	1.68 ( 0.56 )
Productive Cough	7	1.09 ( 0.51 - 2.34 )	1.09 ( 0.05 )	1.08 ( 0.57 )	0.11 ( -0.94 )
Tubulointerstitial Nephritis	7	0.46 ( 0.22 - 0.98 )	0.46 ( 4.21 )	0.48 ( 0.26 )	-1.06 ( -2.1 )
Acute Respiratory Failure	7	0.7 ( 0.33 - 1.49 )	0.7 ( 0.88 )	0.71 ( 0.38 )	-0.49 ( -1.54 )
Cytomegalovirus Urinary Tract Infection	7	9.29 ( 3.71 - 23.3 )	9.29 ( 33.66 )	6.39 ( 2.96 )	2.68 ( 1.48 )
Enterococcal Sepsis	7	1.75 ( 0.8 - 3.81 )	1.75 ( 2.04 )	1.68 ( 0.88 )	0.75 ( -0.32 )
Pneumonia Respiratory Syncytial Viral	6	2.07 ( 0.89 - 4.83 )	2.07 ( 2.96 )	1.96 ( 0.96 )	0.97 ( -0.19 )
Cardiac Failure Acute	6	1.44 ( 0.63 - 3.31 )	1.44 ( 0.74 )	1.4 ( 0.7 )	0.49 ( -0.65 )
Graft Complication	6	1.64 ( 0.71 - 3.8 )	1.64 ( 1.38 )	1.59 ( 0.79 )	0.67 ( -0.48 )
Electrolyte Imbalance	6	1.82 ( 0.78 - 4.21 )	1.82 ( 1.99 )	1.74 ( 0.86 )	0.8 ( -0.35 )
Hypokalaemia	6	0.56 ( 0.25 - 1.27 )	0.56 ( 1.98 )	0.58 ( 0.29 )	-0.79 ( -1.91 )
Upper Respiratory Tract Infection	6	0.68 ( 0.3 - 1.53 )	0.68 ( 0.89 )	0.69 ( 0.35 )	-0.54 ( -1.65 )
Acute Lymphocytic Leukaemia	6	1.22 ( 0.53 - 2.79 )	1.22 ( 0.22 )	1.2 ( 0.6 )	0.27 ( -0.86 )
Hepatic Cirrhosis	6	1.79 ( 0.77 - 4.14 )	1.78 ( 1.88 )	1.71 ( 0.85 )	0.77 ( -0.37 )
Cardiogenic Shock	6	1.16 ( 0.51 - 2.66 )	1.16 ( 0.13 )	1.15 ( 0.58 )	0.21 ( -0.92 )
Neutropenic Sepsis	6	1.34 ( 0.59 - 3.09 )	1.34 ( 0.49 )	1.32 ( 0.66 )	0.4 ( -0.74 )
Gastrointestinal Disorder	6	0.42 ( 0.19 - 0.95 )	0.42 ( 4.68 )	0.43 ( 0.22 )	-1.2 ( -2.31 )
Oral Disorder	6	2.2 ( 0.94 - 5.15 )	2.2 ( 3.49 )	2.07 ( 1.01 )	1.05 ( -0.11 )
Diarrhoea Infectious	6	5.45 ( 2.18 - 13.65 )	5.45 ( 16.56 )	4.38 ( 2.03 )	2.13 ( 0.9 )
Gastroenteritis	6	0.86 ( 0.38 - 1.96 )	0.86 ( 0.13 )	0.87 ( 0.44 )	-0.2 ( -1.32 )
Liver Function Test Abnormal	6	0.35 ( 0.16 - 0.79 )	0.35 ( 7.02 )	0.37 ( 0.19 )	-1.45 ( -2.56 )
Lung Transplant	6	14.79 ( 4.97 - 44.03 )	14.79 ( 41.53 )	8.42 ( 3.38 )	3.07 ( 1.74 )
Diffuse Alveolar Damage	6	2.72 ( 1.15 - 6.45 )	2.72 ( 5.66 )	2.49 ( 1.21 )	1.32 ( 0.14 )
Shock	6	0.72 ( 0.32 - 1.63 )	0.72 ( 0.63 )	0.73 ( 0.37 )	-0.45 ( -1.57 )
Mycobacterial Infection	6	1.48 ( 0.64 - 3.41 )	1.48 ( 0.86 )	1.44 ( 0.72 )	0.53 ( -0.61 )
Fungaemia	6	1.44 ( 0.63 - 3.31 )	1.44 ( 0.74 )	1.4 ( 0.7 )	0.49 ( -0.65 )
Amenorrhoea	6	4.93 ( 1.99 - 12.22 )	4.93 ( 14.62 )	4.06 ( 1.9 )	2.02 ( 0.8 )
Febrile Bone Marrow Aplasia	6	2.59 ( 1.1 - 6.11 )	2.59 ( 5.08 )	2.38 ( 1.16 )	1.25 ( 0.08 )
Klebsiella Bacteraemia	6	1.85 ( 0.8 - 4.29 )	1.85 ( 2.11 )	1.77 ( 0.87 )	0.82 ( -0.33 )
Adrenal Haemorrhage	6	20.71 ( 6.32 - 67.88 )	20.7 ( 51.14 )	9.96 ( 3.69 )	3.32 ( 1.94 )
Neutrophil Count Abnormal	6	25.89 ( 7.31 - 91.76 )	25.88 ( 57.4 )	10.95 ( 3.8 )	3.45 ( 2.06 )
Liver Injury	6	1.82 ( 0.78 - 4.21 )	1.82 ( 1.99 )	1.74 ( 0.86 )	0.8 ( -0.35 )
Inflammation	6	0.69 ( 0.31 - 1.57 )	0.69 ( 0.77 )	0.71 ( 0.36 )	-0.5 ( -1.62 )
Hypercalcaemia	6	1.75 ( 0.76 - 4.07 )	1.75 ( 1.77 )	1.68 ( 0.83 )	0.75 ( -0.39 )
Urinary Tract Infection	6	0.16 ( 0.07 - 0.37 )	0.16 ( 25.4 )	0.17 ( 0.09 )	-2.54 ( -3.64 )
Disseminated Bacillus Calmette-Guerin Infection	6	5.75 ( 2.28 - 14.5 )	5.75 ( 17.66 )	4.56 ( 2.11 )	2.19 ( 0.96 )
Polyneuropathy	6	1.5 ( 0.65 - 3.46 )	1.5 ( 0.92 )	1.46 ( 0.73 )	0.55 ( -0.59 )
Meningitis Viral	6	3.05 ( 1.28 - 7.26 )	3.04 ( 7 )	2.74 ( 1.32 )	1.45 ( 0.27 )
Pseudomembranous Colitis	6	2.41 ( 1.02 - 5.66 )	2.41 ( 4.33 )	2.23 ( 1.09 )	1.16 ( 0 )
Blood Lactate Dehydrogenase Increased	6	0.45 ( 0.2 - 1.01 )	0.45 ( 3.93 )	0.46 ( 0.24 )	-1.11 ( -2.21 )
Jaundice	6	0.59 ( 0.26 - 1.33 )	0.59 ( 1.64 )	0.61 ( 0.31 )	-0.72 ( -1.84 )
Lymphoproliferative Disorder	6	0.8 ( 0.35 - 1.82 )	0.8 ( 0.28 )	0.81 ( 0.41 )	-0.3 ( -1.42 )
Alpha Haemolytic Streptococcal Infection	6	2.47 ( 1.05 - 5.8 )	2.46 ( 4.57 )	2.28 ( 1.12 )	1.19 ( 0.02 )
Human Herpesvirus 6 Infection Reactivation	6	1.85 ( 0.8 - 4.29 )	1.85 ( 2.11 )	1.77 ( 0.87 )	0.82 ( -0.33 )
Cardiomegaly	6	0.97 ( 0.43 - 2.2 )	0.97 ( 0.01 )	0.97 ( 0.49 )	-0.05 ( -1.17 )
Growth Retardation	6	1.31 ( 0.57 - 3.01 )	1.31 ( 0.41 )	1.29 ( 0.64 )	0.37 ( -0.77 )
Drug Resistance	6	0.35 ( 0.16 - 0.79 )	0.35 ( 6.97 )	0.37 ( 0.19 )	-1.45 ( -2.55 )
Meningitis	6	1.95 ( 0.84 - 4.55 )	1.95 ( 2.51 )	1.86 ( 0.92 )	0.89 ( -0.26 )
Portal Vein Thrombosis	6	3.34 ( 1.39 - 8.01 )	3.34 ( 8.24 )	2.96 ( 1.42 )	1.57 ( 0.38 )
Stenotrophomonas Bacteraemia	6	51.78 ( 10.45 - 256.6 )	51.76 ( 74.67 )	13.69 ( 3.59 )	3.77 ( 2.32 )
Renal Tubular Injury	6	1.14 ( 0.5 - 2.6 )	1.14 ( 0.09 )	1.13 ( 0.57 )	0.18 ( -0.95 )
Pulmonary Fibrosis	5	1.37 ( 0.55 - 3.4 )	1.37 ( 0.46 )	1.34 ( 0.63 )	0.42 ( -0.8 )
Lung Abscess	5	3.92 ( 1.49 - 10.36 )	3.92 ( 8.87 )	3.38 ( 1.5 )	1.76 ( 0.46 )
Haemodynamic Instability	5	0.9 ( 0.37 - 2.21 )	0.9 ( 0.05 )	0.9 ( 0.43 )	-0.15 ( -1.36 )
Adenoviral Hepatitis	5	1.51 ( 0.61 - 3.78 )	1.51 ( 0.8 )	1.47 ( 0.68 )	0.56 ( -0.68 )
Brain Oedema	5	0.69 ( 0.28 - 1.69 )	0.69 ( 0.67 )	0.7 ( 0.33 )	-0.51 ( -1.72 )
Cognitive Disorder	5	1.76 ( 0.7 - 4.42 )	1.76 ( 1.49 )	1.69 ( 0.78 )	0.76 ( -0.48 )
Delirium	5	0.78 ( 0.32 - 1.92 )	0.78 ( 0.28 )	0.79 ( 0.37 )	-0.33 ( -1.54 )
Metapneumovirus Infection	5	1.88 ( 0.75 - 4.72 )	1.88 ( 1.84 )	1.79 ( 0.83 )	0.84 ( -0.4 )
Thrombosis	5	0.55 ( 0.23 - 1.35 )	0.55 ( 1.75 )	0.57 ( 0.27 )	-0.82 ( -2.02 )
Fall	5	0.47 ( 0.19 - 1.14 )	0.47 ( 2.93 )	0.48 ( 0.23 )	-1.05 ( -2.25 )
Spinal Cord Disorder	5	5.39 ( 1.98 - 14.72 )	5.39 ( 13.63 )	4.35 ( 1.88 )	2.12 ( 0.79 )
Respiratory Tract Infection	5	0.67 ( 0.28 - 1.65 )	0.67 ( 0.76 )	0.69 ( 0.32 )	-0.54 ( -1.75 )
Tuberculosis	5	0.99 ( 0.4 - 2.44 )	0.99 ( 0 )	0.99 ( 0.47 )	-0.01 ( -1.23 )
Tooth Hypoplasia	5	8.63 ( 2.95 - 25.25 )	8.63 ( 22.47 )	6.08 ( 2.48 )	2.61 ( 1.22 )
Gastroenteritis Adenovirus	5	2.01 ( 0.79 - 5.07 )	2.01 ( 2.26 )	1.9 ( 0.88 )	0.93 ( -0.32 )
Cardio-Respiratory Arrest	5	0.92 ( 0.37 - 2.26 )	0.92 ( 0.04 )	0.92 ( 0.43 )	-0.12 ( -1.33 )
Deep Vein Thrombosis	5	0.48 ( 0.2 - 1.17 )	0.48 ( 2.76 )	0.49 ( 0.23 )	-1.02 ( -2.22 )
Glomerulonephritis Membranous	5	1.6 ( 0.64 - 3.99 )	1.6 ( 1.02 )	1.55 ( 0.72 )	0.63 ( -0.61 )
Blood Culture Positive	5	1.35 ( 0.54 - 3.35 )	1.35 ( 0.42 )	1.32 ( 0.62 )	0.4 ( -0.82 )
Traumatic Lung Injury	5	12.33 ( 3.91 - 38.85 )	12.32 ( 30.35 )	7.61 ( 2.91 )	2.93 ( 1.5 )
Alternaria Infection	5	3.6 ( 1.37 - 9.42 )	3.59 ( 7.75 )	3.15 ( 1.41 )	1.65 ( 0.36 )
Upper Respiratory Fungal Infection	5	7.84 ( 2.73 - 22.58 )	7.84 ( 20.52 )	5.7 ( 2.35 )	2.51 ( 1.14 )
Catheter Site Infection	5	6.64 ( 2.37 - 18.62 )	6.64 ( 17.28 )	5.07 ( 2.14 )	2.34 ( 0.99 )
Splenomegaly	5	0.87 ( 0.35 - 2.14 )	0.87 ( 0.09 )	0.88 ( 0.41 )	-0.19 ( -1.4 )
Hypoproteinaemia	5	2.7 ( 1.05 - 6.92 )	2.7 ( 4.61 )	2.47 ( 1.12 )	1.3 ( 0.03 )
Cortisol Decreased	5	17.26 ( 5 - 59.63 )	17.25 ( 38.28 )	9.13 ( 3.23 )	3.19 ( 1.73 )
Hyperammonaemia	5	2.7 ( 1.05 - 6.92 )	2.7 ( 4.61 )	2.47 ( 1.12 )	1.3 ( 0.03 )
Diplopia	5	1.17 ( 0.47 - 2.88 )	1.17 ( 0.11 )	1.16 ( 0.54 )	0.21 ( -1.01 )
Myocarditis	5	1.25 ( 0.5 - 3.1 )	1.25 ( 0.23 )	1.23 ( 0.58 )	0.3 ( -0.92 )
Enterobacter Infection	5	1.08 ( 0.44 - 2.66 )	1.08 ( 0.03 )	1.07 ( 0.5 )	0.1 ( -1.12 )
Herpes Zoster Infection Neurological	5	9.59 ( 3.21 - 28.62 )	9.58 ( 24.72 )	6.52 ( 2.61 )	2.7 ( 1.31 )
Haematotoxicity	5	0.51 ( 0.21 - 1.23 )	0.51 ( 2.32 )	0.52 ( 0.25 )	-0.94 ( -2.14 )
Fungal Sepsis	5	2.1 ( 0.83 - 5.33 )	2.1 ( 2.58 )	1.98 ( 0.91 )	0.99 ( -0.26 )
Palpitations	5	1.46 ( 0.59 - 3.64 )	1.46 ( 0.67 )	1.43 ( 0.66 )	0.51 ( -0.72 )
Sarcoidosis	5	4.79 ( 1.78 - 12.91 )	4.79 ( 11.74 )	3.97 ( 1.73 )	1.99 ( 0.67 )
Hepatorenal Syndrome	5	5.39 ( 1.98 - 14.72 )	5.39 ( 13.63 )	4.35 ( 1.88 )	2.12 ( 0.79 )
Fusarium Infection	5	2.27 ( 0.89 - 5.77 )	2.27 ( 3.14 )	2.12 ( 0.97 )	1.09 ( -0.17 )
Cervical Dysplasia	5	7.84 ( 2.73 - 22.58 )	7.84 ( 20.52 )	5.7 ( 2.35 )	2.51 ( 1.14 )
Somnolence	5	0.51 ( 0.21 - 1.25 )	0.51 ( 2.24 )	0.53 ( 0.25 )	-0.92 ( -2.12 )
Thyroiditis	5	7.84 ( 2.73 - 22.58 )	7.84 ( 20.52 )	5.7 ( 2.35 )	2.51 ( 1.14 )
Intestinal Haemorrhage	5	3.75 ( 1.43 - 9.87 )	3.75 ( 8.29 )	3.26 ( 1.45 )	1.7 ( 0.41 )
Dysuria	5	0.88 ( 0.36 - 2.16 )	0.88 ( 0.08 )	0.89 ( 0.42 )	-0.17 ( -1.39 )
Abdominal Pain Upper	5	0.47 ( 0.19 - 1.14 )	0.47 ( 2.93 )	0.48 ( 0.23 )	-1.05 ( -2.25 )
Pancreatitis Acute	5	0.66 ( 0.27 - 1.62 )	0.66 ( 0.82 )	0.68 ( 0.32 )	-0.56 ( -1.77 )
Kaposi'S Sarcoma	5	0.48 ( 0.2 - 1.16 )	0.48 ( 2.8 )	0.49 ( 0.23 )	-1.03 ( -2.22 )
Disseminated Toxoplasmosis	5	3.45 ( 1.32 - 9.02 )	3.45 ( 7.25 )	3.04 ( 1.36 )	1.61 ( 0.32 )
Diabetes Insipidus	5	4.79 ( 1.78 - 12.91 )	4.79 ( 11.74 )	3.97 ( 1.73 )	1.99 ( 0.67 )
Hypothermia	5	3.92 ( 1.49 - 10.36 )	3.92 ( 8.87 )	3.38 ( 1.5 )	1.76 ( 0.46 )
Haematochezia	5	1.06 ( 0.43 - 2.63 )	1.06 ( 0.02 )	1.06 ( 0.5 )	0.09 ( -1.13 )
Parainfluenzae Virus Infection	5	0.87 ( 0.35 - 2.14 )	0.87 ( 0.09 )	0.88 ( 0.41 )	-0.19 ( -1.4 )
Adenovirus Reactivation	5	1.66 ( 0.66 - 4.15 )	1.66 ( 1.19 )	1.6 ( 0.74 )	0.68 ( -0.56 )
Large Granular Lymphocytosis	5	17.26 ( 5 - 59.63 )	17.25 ( 38.28 )	9.13 ( 3.23 )	3.19 ( 1.73 )
Insomnia	5	0.4 ( 0.17 - 0.98 )	0.4 ( 4.28 )	0.42 ( 0.2 )	-1.26 ( -2.45 )
Organ Failure	5	1.49 ( 0.6 - 3.71 )	1.49 ( 0.74 )	1.45 ( 0.67 )	0.53 ( -0.7 )
Arthralgia	5	0.37 ( 0.15 - 0.89 )	0.37 ( 5.35 )	0.38 ( 0.18 )	-1.39 ( -2.59 )
Non-Hodgkin'S Lymphoma	5	1.41 ( 0.57 - 3.52 )	1.41 ( 0.56 )	1.38 ( 0.64 )	0.47 ( -0.76 )
Duodenal Ulcer	5	2.61 ( 1.02 - 6.7 )	2.61 ( 4.33 )	2.4 ( 1.09 )	1.26 ( 0 )
Platelet Transfusion	5	7.19 ( 2.53 - 20.42 )	7.19 ( 18.8 )	5.37 ( 2.24 )	2.42 ( 1.06 )
Paraesthesia	5	0.76 ( 0.31 - 1.87 )	0.76 ( 0.35 )	0.77 ( 0.37 )	-0.37 ( -1.58 )
Hyperfibrinogenaemia	5	17.26 ( 5 - 59.63 )	17.25 ( 38.28 )	9.13 ( 3.23 )	3.19 ( 1.73 )
Retinopathy Haemorrhagic	5	14.38 ( 4.39 - 47.13 )	14.38 ( 33.95 )	8.3 ( 3.07 )	3.05 ( 1.61 )
Neck Pain	5	2.88 ( 1.12 - 7.41 )	2.88 ( 5.24 )	2.61 ( 1.18 )	1.38 ( 0.11 )
Vertigo	5	1.18 ( 0.48 - 2.92 )	1.18 ( 0.13 )	1.17 ( 0.55 )	0.23 ( -1 )
Continuous Haemodiafiltration	5	5.75 ( 2.09 - 15.83 )	5.75 ( 14.72 )	4.56 ( 1.96 )	2.19 ( 0.85 )
Delayed Engraftment	5	2.54 ( 0.99 - 6.49 )	2.54 ( 4.06 )	2.34 ( 1.07 )	1.23 ( -0.04 )
Gait Disturbance	5	0.55 ( 0.23 - 1.35 )	0.55 ( 1.75 )	0.57 ( 0.27 )	-0.82 ( -2.02 )
Streptococcal Sepsis	5	2.47 ( 0.97 - 6.29 )	2.46 ( 3.81 )	2.28 ( 1.04 )	1.19 ( -0.07 )
Urinary Bladder Toxicity	5	Inf ( NaN - Inf )	Inf ( 86.26 )	18.25 ( 0 )	4.19 ( 2.52 )
Acidosis	5	1.11 ( 0.45 - 2.73 )	1.11 ( 0.05 )	1.1 ( 0.52 )	0.14 ( -1.08 )
Urine Output Decreased	5	0.85 ( 0.35 - 2.1 )	0.85 ( 0.12 )	0.86 ( 0.41 )	-0.22 ( -1.43 )
Stenotrophomonas Sepsis	5	3.92 ( 1.49 - 10.36 )	3.92 ( 8.87 )	3.38 ( 1.5 )	1.76 ( 0.46 )
Surgical Procedure Repeated	5	3.75 ( 1.43 - 9.87 )	3.75 ( 8.29 )	3.26 ( 1.45 )	1.7 ( 0.41 )
Oral Toxicity	4	Inf ( NaN - Inf )	Inf ( 69.01 )	18.25 ( 0 )	4.19 ( 2.36 )
Renal Disorder	4	0.28 ( 0.11 - 0.76 )	0.28 ( 7.11 )	0.3 ( 0.13 )	-1.76 ( -3.06 )
Tooth Development Disorder	4	23.01 ( 5.15 - 102.83 )	23 ( 36.08 )	10.43 ( 2.98 )	3.38 ( 1.74 )
Acute Lymphocytic Leukaemia Recurrent	4	0.54 ( 0.2 - 1.47 )	0.54 ( 1.49 )	0.56 ( 0.24 )	-0.84 ( -2.16 )
Thrombotic Thrombocytopenic Purpura	4	0.92 ( 0.34 - 2.52 )	0.92 ( 0.03 )	0.92 ( 0.4 )	-0.11 ( -1.44 )
Muscular Weakness	4	0.51 ( 0.19 - 1.37 )	0.51 ( 1.86 )	0.52 ( 0.23 )	-0.94 ( -2.25 )
Renal Injury	4	0.87 ( 0.32 - 2.39 )	0.87 ( 0.07 )	0.88 ( 0.38 )	-0.19 ( -1.51 )
Mouth Haemorrhage	4	3.83 ( 1.3 - 11.33 )	3.83 ( 6.86 )	3.32 ( 1.34 )	1.73 ( 0.31 )
Hallucination, Auditory	4	4.31 ( 1.44 - 12.91 )	4.31 ( 8.14 )	3.65 ( 1.46 )	1.87 ( 0.43 )
Herpes Zoster Meningoencephalitis	4	2.38 ( 0.84 - 6.77 )	2.38 ( 2.81 )	2.21 ( 0.92 )	1.15 ( -0.24 )
Roseolovirus Test Positive	4	6.9 ( 2.16 - 22.01 )	6.9 ( 14.42 )	5.21 ( 1.98 )	2.38 ( 0.89 )
Portal Hypertension	4	2.23 ( 0.79 - 6.31 )	2.23 ( 2.39 )	2.09 ( 0.87 )	1.06 ( -0.32 )
Skin Necrosis	4	1.61 ( 0.58 - 4.47 )	1.6 ( 0.83 )	1.55 ( 0.66 )	0.64 ( -0.72 )
Escherichia Urinary Tract Infection	4	0.82 ( 0.3 - 2.24 )	0.82 ( 0.15 )	0.83 ( 0.36 )	-0.27 ( -1.6 )
Anal Abscess	4	2.65 ( 0.93 - 7.61 )	2.65 ( 3.57 )	2.43 ( 1.01 )	1.28 ( -0.11 )
Adenosquamous Cell Lung Cancer	4	23.01 ( 5.15 - 102.83 )	23 ( 36.08 )	10.43 ( 2.98 )	3.38 ( 1.74 )
Atypical Haemolytic Uraemic Syndrome	4	1.77 ( 0.63 - 4.95 )	1.77 ( 1.21 )	1.7 ( 0.72 )	0.76 ( -0.6 )
Post Procedural Haemorrhage	4	2.38 ( 0.84 - 6.77 )	2.38 ( 2.81 )	2.21 ( 0.92 )	1.15 ( -0.24 )
Left Ventricular Dysfunction	4	1.08 ( 0.39 - 2.96 )	1.08 ( 0.02 )	1.07 ( 0.46 )	0.1 ( -1.23 )
Citrobacter Bacteraemia	4	11.51 ( 3.25 - 40.78 )	11.5 ( 23.01 )	7.3 ( 2.53 )	2.87 ( 1.31 )
Pharyngitis	4	1.68 ( 0.6 - 4.7 )	1.68 ( 1.01 )	1.62 ( 0.69 )	0.7 ( -0.66 )
Abdominal Distension	4	0.5 ( 0.19 - 1.36 )	0.5 ( 1.9 )	0.52 ( 0.23 )	-0.95 ( -2.26 )
Scedosporium Infection	4	1.1 ( 0.4 - 3.01 )	1.1 ( 0.03 )	1.09 ( 0.47 )	0.12 ( -1.21 )
Toxic Epidermal Necrolysis	4	0.65 ( 0.24 - 1.77 )	0.65 ( 0.72 )	0.66 ( 0.29 )	-0.59 ( -1.91 )
Drug-Induced Liver Injury	4	0.88 ( 0.32 - 2.42 )	0.88 ( 0.06 )	0.89 ( 0.38 )	-0.17 ( -1.5 )
Pseudomonal Bacteraemia	4	1.92 ( 0.68 - 5.39 )	1.92 ( 1.58 )	1.83 ( 0.77 )	0.87 ( -0.5 )
Cerebral Aspergillosis	4	1.35 ( 0.49 - 3.74 )	1.35 ( 0.34 )	1.33 ( 0.57 )	0.41 ( -0.94 )
Loss Of Consciousness	4	0.48 ( 0.18 - 1.3 )	0.48 ( 2.16 )	0.5 ( 0.22 )	-1.01 ( -2.32 )
Neurological Decompensation	4	2.23 ( 0.79 - 6.31 )	2.23 ( 2.39 )	2.09 ( 0.87 )	1.06 ( -0.32 )
Ejection Fraction Decreased	4	0.97 ( 0.35 - 2.66 )	0.97 ( 0 )	0.97 ( 0.42 )	-0.04 ( -1.37 )
Chronic Graft Versus Host Disease In Liver	4	0.64 ( 0.24 - 1.75 )	0.64 ( 0.75 )	0.66 ( 0.29 )	-0.6 ( -1.92 )
Meningitis Enterococcal	4	8.63 ( 2.6 - 28.66 )	8.63 ( 17.98 )	6.08 ( 2.23 )	2.61 ( 1.09 )
Nervous System Disorder	4	0.49 ( 0.18 - 1.31 )	0.49 ( 2.12 )	0.5 ( 0.22 )	-1 ( -2.31 )
Vascular Device Infection	4	2.56 ( 0.89 - 7.31 )	2.56 ( 3.3 )	2.36 ( 0.98 )	1.24 ( -0.15 )
Pneumonia Influenzal	4	2.38 ( 0.84 - 6.77 )	2.38 ( 2.81 )	2.21 ( 0.92 )	1.15 ( -0.24 )
Meningitis Cryptococcal	4	1.61 ( 0.58 - 4.47 )	1.6 ( 0.83 )	1.55 ( 0.66 )	0.64 ( -0.72 )
Polyserositis	4	17.26 ( 4.32 - 69.01 )	17.25 ( 30.62 )	9.13 ( 2.86 )	3.19 ( 1.58 )
Enterocolitis	4	1.25 ( 0.45 - 3.46 )	1.25 ( 0.19 )	1.24 ( 0.53 )	0.31 ( -1.04 )
Non-Cirrhotic Portal Hypertension	4	23.01 ( 5.15 - 102.83 )	23 ( 36.08 )	10.43 ( 2.98 )	3.38 ( 1.74 )
Intestinal Obstruction	4	1.06 ( 0.39 - 2.91 )	1.06 ( 0.01 )	1.06 ( 0.45 )	0.08 ( -1.25 )
Demyelination	4	2.03 ( 0.72 - 5.72 )	2.03 ( 1.87 )	1.92 ( 0.81 )	0.94 ( -0.43 )
Pleural Thickening	4	9.86 ( 2.89 - 33.69 )	9.86 ( 20.26 )	6.64 ( 2.37 )	2.73 ( 1.19 )
Anuria	4	0.55 ( 0.2 - 1.49 )	0.55 ( 1.41 )	0.57 ( 0.25 )	-0.82 ( -2.14 )
Irritability	4	3 ( 1.04 - 8.68 )	3 ( 4.54 )	2.7 ( 1.11 )	1.44 ( 0.03 )
Focal Segmental Glomerulosclerosis	4	0.7 ( 0.26 - 1.91 )	0.7 ( 0.48 )	0.72 ( 0.31 )	-0.48 ( -1.8 )
Pneumococcal Sepsis	4	3.14 ( 1.08 - 9.11 )	3.14 ( 4.93 )	2.81 ( 1.15 )	1.49 ( 0.08 )
Lymph Node Tuberculosis	4	6.9 ( 2.16 - 22.01 )	6.9 ( 14.42 )	5.21 ( 1.98 )	2.38 ( 0.89 )
Blood Alkaline Phosphatase Increased	4	0.42 ( 0.16 - 1.13 )	0.42 ( 3.16 )	0.43 ( 0.19 )	-1.21 ( -2.52 )
Nocardiosis	4	0.48 ( 0.18 - 1.29 )	0.48 ( 2.2 )	0.49 ( 0.21 )	-1.02 ( -2.33 )
Gastrointestinal Mucosal Disorder	4	6.28 ( 2 - 19.71 )	6.27 ( 13 )	4.87 ( 1.87 )	2.28 ( 0.8 )
Haemolytic Anaemia	4	0.55 ( 0.2 - 1.49 )	0.55 ( 1.41 )	0.57 ( 0.25 )	-0.82 ( -2.14 )
Rhinorrhoea	4	1.25 ( 0.45 - 3.46 )	1.25 ( 0.19 )	1.24 ( 0.53 )	0.31 ( -1.04 )
Proteinuria	4	0.27 ( 0.1 - 0.72 )	0.27 ( 7.86 )	0.28 ( 0.12 )	-1.84 ( -3.14 )
Autoimmune Pancytopenia	4	13.81 ( 3.71 - 51.42 )	13.8 ( 26.39 )	8.11 ( 2.7 )	3.02 ( 1.44 )
Bladder Tamponade	4	11.51 ( 3.25 - 40.78 )	11.5 ( 23.01 )	7.3 ( 2.53 )	2.87 ( 1.31 )
Intracranial Pressure Increased	4	1.35 ( 0.49 - 3.74 )	1.35 ( 0.34 )	1.33 ( 0.57 )	0.41 ( -0.94 )
Pneumatosis Intestinalis	4	0.66 ( 0.24 - 1.78 )	0.66 ( 0.69 )	0.67 ( 0.29 )	-0.58 ( -1.9 )
Cardiopulmonary Failure	4	2.47 ( 0.86 - 7.03 )	2.46 ( 3.05 )	2.28 ( 0.95 )	1.19 ( -0.19 )
Covid-19 Pneumonia	4	0.33 ( 0.12 - 0.89 )	0.33 ( 5.34 )	0.34 ( 0.15 )	-1.54 ( -2.85 )
Actinomycotic Sepsis	4	9.86 ( 2.89 - 33.69 )	9.86 ( 20.26 )	6.64 ( 2.37 )	2.73 ( 1.19 )
Cellulitis Staphylococcal	4	3.63 ( 1.24 - 10.68 )	3.63 ( 6.3 )	3.17 ( 1.29 )	1.67 ( 0.25 )
Focal Nodular Hyperplasia	4	3.45 ( 1.18 - 10.1 )	3.45 ( 5.8 )	3.04 ( 1.24 )	1.61 ( 0.19 )
Ill-Defined Disorder	4	1.3 ( 0.47 - 3.6 )	1.3 ( 0.26 )	1.28 ( 0.55 )	0.36 ( -0.99 )
C-Reactive Protein Increased	4	0.26 ( 0.1 - 0.7 )	0.26 ( 8.29 )	0.27 ( 0.12 )	-1.88 ( -3.18 )
Enterocolitis Viral	4	3.14 ( 1.08 - 9.11 )	3.14 ( 4.93 )	2.81 ( 1.15 )	1.49 ( 0.08 )
Hyperplasia	4	5.75 ( 1.85 - 17.84 )	5.75 ( 11.77 )	4.56 ( 1.77 )	2.19 ( 0.72 )
Immune Reconstitution Inflammatory Syndrome	4	1.1 ( 0.4 - 3.01 )	1.1 ( 0.03 )	1.09 ( 0.47 )	0.12 ( -1.21 )
Ileus	4	0.78 ( 0.29 - 2.14 )	0.78 ( 0.23 )	0.79 ( 0.34 )	-0.33 ( -1.66 )
Feeding Disorder	4	3.29 ( 1.13 - 9.58 )	3.29 ( 5.34 )	2.92 ( 1.19 )	1.55 ( 0.14 )
Norovirus Infection	4	1.38 ( 0.5 - 3.82 )	1.38 ( 0.39 )	1.35 ( 0.58 )	0.44 ( -0.91 )
Arrhythmia	4	1.23 ( 0.45 - 3.4 )	1.23 ( 0.16 )	1.22 ( 0.52 )	0.28 ( -1.06 )
Haemoptysis	4	0.62 ( 0.23 - 1.69 )	0.62 ( 0.89 )	0.63 ( 0.28 )	-0.66 ( -1.97 )
Hepatitis Acute	4	1.61 ( 0.58 - 4.47 )	1.6 ( 0.83 )	1.55 ( 0.66 )	0.64 ( -0.72 )
Serratia Infection	4	2.3 ( 0.81 - 6.53 )	2.3 ( 2.59 )	2.15 ( 0.9 )	1.1 ( -0.28 )
Coma	4	0.44 ( 0.16 - 1.18 )	0.44 ( 2.84 )	0.45 ( 0.2 )	-1.15 ( -2.46 )
Gastric Haemorrhage	4	5.31 ( 1.73 - 16.29 )	5.31 ( 10.7 )	4.29 ( 1.68 )	2.1 ( 0.64 )
Granuloma	4	1.97 ( 0.7 - 5.55 )	1.97 ( 1.72 )	1.87 ( 0.79 )	0.9 ( -0.46 )
Neuropsychiatric Syndrome	4	69.03 ( 7.71 - 617.7 )	69.01 ( 53.62 )	14.6 ( 2.33 )	3.87 ( 2.12 )
Amnesia	4	0.64 ( 0.24 - 1.73 )	0.64 ( 0.79 )	0.65 ( 0.28 )	-0.62 ( -1.94 )
Hypernatraemia	4	1.82 ( 0.65 - 5.09 )	1.82 ( 1.33 )	1.74 ( 0.73 )	0.8 ( -0.57 )
Cord Blood Transplant Therapy	4	1.92 ( 0.68 - 5.39 )	1.92 ( 1.58 )	1.83 ( 0.77 )	0.87 ( -0.5 )
Blister	3	0.89 ( 0.28 - 2.85 )	0.89 ( 0.04 )	0.9 ( 0.34 )	-0.16 ( -1.64 )
Skin Exfoliation	3	0.59 ( 0.19 - 1.88 )	0.59 ( 0.8 )	0.61 ( 0.23 )	-0.72 ( -2.19 )
Cardiac Disorder	3	0.83 ( 0.26 - 2.66 )	0.83 ( 0.09 )	0.84 ( 0.32 )	-0.25 ( -1.73 )
Drug Clearance Decreased	3	7.4 ( 1.91 - 28.6 )	7.39 ( 11.61 )	5.48 ( 1.77 )	2.45 ( 0.77 )
Swelling	3	0.4 ( 0.13 - 1.26 )	0.4 ( 2.62 )	0.41 ( 0.16 )	-1.27 ( -2.73 )
Acinetobacter Infection	3	1.18 ( 0.37 - 3.79 )	1.18 ( 0.07 )	1.17 ( 0.44 )	0.22 ( -1.28 )
Brain Death	3	2.46 ( 0.74 - 8.27 )	2.46 ( 2.28 )	2.28 ( 0.83 )	1.19 ( -0.36 )
Respiratory Arrest	3	0.92 ( 0.29 - 2.95 )	0.92 ( 0.02 )	0.93 ( 0.35 )	-0.11 ( -1.6 )
Aspiration	3	1.62 ( 0.5 - 5.28 )	1.62 ( 0.65 )	1.56 ( 0.58 )	0.65 ( -0.88 )
Pneumonia Pseudomonal	3	1.08 ( 0.34 - 3.46 )	1.08 ( 0.02 )	1.07 ( 0.4 )	0.1 ( -1.39 )
Sepsis Syndrome	3	10.35 ( 2.47 - 43.33 )	10.35 ( 15.84 )	6.84 ( 2.07 )	2.77 ( 1.04 )
Myocardial Infarction	3	0.28 ( 0.09 - 0.87 )	0.28 ( 5.59 )	0.29 ( 0.11 )	-1.79 ( -3.25 )
Appendicitis	3	1.26 ( 0.39 - 4.08 )	1.26 ( 0.15 )	1.24 ( 0.47 )	0.32 ( -1.19 )
Vasculitis	3	2.35 ( 0.7 - 7.86 )	2.35 ( 2.05 )	2.19 ( 0.8 )	1.13 ( -0.42 )
Subdural Haematoma	3	1.36 ( 0.42 - 4.41 )	1.36 ( 0.27 )	1.34 ( 0.5 )	0.42 ( -1.09 )
Hypersensitivity	3	0.43 ( 0.14 - 1.36 )	0.43 ( 2.2 )	0.45 ( 0.17 )	-1.17 ( -2.63 )
Diabetes Mellitus	3	0.14 ( 0.04 - 0.43 )	0.14 ( 15.82 )	0.15 ( 0.06 )	-2.77 ( -4.22 )
Haemosiderosis	3	3.24 ( 0.94 - 11.11 )	3.23 ( 3.9 )	2.88 ( 1.03 )	1.53 ( -0.05 )
Gastroenteritis Rotavirus	3	1.67 ( 0.51 - 5.46 )	1.67 ( 0.73 )	1.61 ( 0.6 )	0.69 ( -0.84 )
Leukaemia	3	0.88 ( 0.27 - 2.8 )	0.88 ( 0.05 )	0.88 ( 0.33 )	-0.18 ( -1.67 )
Hyperthyroidism	3	1.85 ( 0.56 - 6.08 )	1.85 ( 1.06 )	1.77 ( 0.65 )	0.82 ( -0.71 )
Hypertransaminasaemia	3	1 ( 0.31 - 3.19 )	1 ( 0 )	1 ( 0.38 )	-0.01 ( -1.5 )
Dysphonia	3	1.36 ( 0.42 - 4.41 )	1.36 ( 0.27 )	1.34 ( 0.5 )	0.42 ( -1.09 )
Stridor	3	2.88 ( 0.85 - 9.76 )	2.88 ( 3.15 )	2.61 ( 0.94 )	1.38 ( -0.19 )
Hypogonadism	3	3.05 ( 0.89 - 10.39 )	3.04 ( 3.5 )	2.74 ( 0.98 )	1.45 ( -0.12 )
Diffuse Large B-Cell Lymphoma	3	0.27 ( 0.08 - 0.83 )	0.27 ( 6.01 )	0.28 ( 0.11 )	-1.85 ( -3.31 )
Myelitis Transverse	3	1.78 ( 0.54 - 5.86 )	1.78 ( 0.94 )	1.71 ( 0.63 )	0.77 ( -0.75 )
Adenocarcinoma Of Colon	3	4.71 ( 1.31 - 16.87 )	4.71 ( 6.88 )	3.91 ( 1.34 )	1.97 ( 0.34 )
Constipation	3	0.35 ( 0.11 - 1.09 )	0.35 ( 3.61 )	0.36 ( 0.14 )	-1.47 ( -2.93 )
Dry Mouth	3	1.01 ( 0.32 - 3.25 )	1.01 ( 0 )	1.01 ( 0.38 )	0.02 ( -1.47 )
Wernicke'S Encephalopathy	3	3.7 ( 1.06 - 12.87 )	3.7 ( 4.86 )	3.22 ( 1.13 )	1.69 ( 0.09 )
Pneumatosis	3	4.71 ( 1.31 - 16.87 )	4.71 ( 6.88 )	3.91 ( 1.34 )	1.97 ( 0.34 )
Hepatitis B Reactivation	3	1.4 ( 0.43 - 4.54 )	1.4 ( 0.32 )	1.37 ( 0.51 )	0.45 ( -1.06 )
Lung Adenocarcinoma	3	2.16 ( 0.65 - 7.16 )	2.16 ( 1.65 )	2.03 ( 0.74 )	1.02 ( -0.52 )
Coombs Positive Haemolytic Anaemia	3	5.18 ( 1.42 - 18.81 )	5.18 ( 7.77 )	4.21 ( 1.43 )	2.07 ( 0.44 )
Neuropathy Peripheral	3	0.23 ( 0.07 - 0.72 )	0.23 ( 7.58 )	0.24 ( 0.09 )	-2.05 ( -3.51 )
Fluid Retention	3	0.44 ( 0.14 - 1.38 )	0.44 ( 2.1 )	0.45 ( 0.17 )	-1.14 ( -2.61 )
Chest Pain	3	0.25 ( 0.08 - 0.77 )	0.25 ( 6.77 )	0.26 ( 0.1 )	-1.95 ( -3.41 )
Alopecia	3	0.16 ( 0.05 - 0.51 )	0.16 ( 12.71 )	0.17 ( 0.07 )	-2.54 ( -3.99 )
Pneumonia Mycoplasmal	3	3.24 ( 0.94 - 11.11 )	3.23 ( 3.9 )	2.88 ( 1.03 )	1.53 ( -0.05 )
Neoplasm Recurrence	3	0.89 ( 0.28 - 2.85 )	0.89 ( 0.04 )	0.9 ( 0.34 )	-0.16 ( -1.64 )
Hyperglycaemia	3	0.25 ( 0.08 - 0.77 )	0.25 ( 6.82 )	0.26 ( 0.1 )	-1.96 ( -3.42 )
Treatment Failure	3	0.34 ( 0.11 - 1.07 )	0.34 ( 3.76 )	0.35 ( 0.14 )	-1.5 ( -2.96 )
Dermatitis Exfoliative Generalised	3	3.7 ( 1.06 - 12.87 )	3.7 ( 4.86 )	3.22 ( 1.13 )	1.69 ( 0.09 )
Peritonitis	3	0.46 ( 0.15 - 1.44 )	0.46 ( 1.88 )	0.47 ( 0.18 )	-1.08 ( -2.55 )
Papilloma Viral Infection	3	1.85 ( 0.56 - 6.08 )	1.85 ( 1.06 )	1.77 ( 0.65 )	0.82 ( -0.71 )
Porphyria Non-Acute	3	7.4 ( 1.91 - 28.6 )	7.39 ( 11.61 )	5.48 ( 1.77 )	2.45 ( 0.77 )
Paronychia	3	5.18 ( 1.42 - 18.81 )	5.18 ( 7.77 )	4.21 ( 1.43 )	2.07 ( 0.44 )
B-Lymphocyte Count Decreased	3	5.18 ( 1.42 - 18.81 )	5.18 ( 7.77 )	4.21 ( 1.43 )	2.07 ( 0.44 )
Blood Immunoglobulin A Decreased	3	10.35 ( 2.47 - 43.33 )	10.35 ( 15.84 )	6.84 ( 2.07 )	2.77 ( 1.04 )
Blood Immunoglobulin M Decreased	3	6.47 ( 1.72 - 24.4 )	6.47 ( 10.09 )	4.98 ( 1.64 )	2.32 ( 0.65 )
Maternal Exposure Before Pregnancy	3	5.75 ( 1.56 - 21.25 )	5.75 ( 8.83 )	4.56 ( 1.53 )	2.19 ( 0.54 )
Extramedullary Haemopoiesis	3	12.94 ( 2.9 - 57.83 )	12.94 ( 18.89 )	7.82 ( 2.24 )	2.97 ( 1.2 )
Thyroid Cancer	3	1.73 ( 0.53 - 5.65 )	1.73 ( 0.83 )	1.66 ( 0.61 )	0.73 ( -0.79 )
Chronic Inflammatory Demyelinating Polyradiculoneuropathy	3	1.78 ( 0.54 - 5.86 )	1.78 ( 0.94 )	1.71 ( 0.63 )	0.77 ( -0.75 )
Bladder Dysfunction	3	7.4 ( 1.91 - 28.6 )	7.39 ( 11.61 )	5.48 ( 1.77 )	2.45 ( 0.77 )
Pulmonary Sepsis	3	2.88 ( 0.85 - 9.76 )	2.88 ( 3.15 )	2.61 ( 0.94 )	1.38 ( -0.19 )
Therapeutic Response Decreased	3	0.46 ( 0.15 - 1.45 )	0.46 ( 1.83 )	0.48 ( 0.18 )	-1.07 ( -2.54 )
Squamous Cell Carcinoma Of The Oral Cavity	3	5.75 ( 1.56 - 21.25 )	5.75 ( 8.83 )	4.56 ( 1.53 )	2.19 ( 0.54 )
Latent Tuberculosis	3	12.94 ( 2.9 - 57.83 )	12.94 ( 18.89 )	7.82 ( 2.24 )	2.97 ( 1.2 )
Left Ventricular Dilatation	3	17.26 ( 3.48 - 85.51 )	17.25 ( 22.97 )	9.13 ( 2.39 )	3.19 ( 1.38 )
Oxygen Consumption Increased	3	5.18 ( 1.42 - 18.81 )	5.18 ( 7.77 )	4.21 ( 1.43 )	2.07 ( 0.44 )
Systolic Dysfunction	3	17.26 ( 3.48 - 85.51 )	17.25 ( 22.97 )	9.13 ( 2.39 )	3.19 ( 1.38 )
Autoimmune Hepatitis	3	2.59 ( 0.77 - 8.71 )	2.59 ( 2.54 )	2.38 ( 0.86 )	1.25 ( -0.31 )
Aphasia	3	0.44 ( 0.14 - 1.38 )	0.44 ( 2.1 )	0.45 ( 0.17 )	-1.14 ( -2.61 )
Cerebral Infarction	3	0.54 ( 0.17 - 1.72 )	0.54 ( 1.11 )	0.56 ( 0.21 )	-0.84 ( -2.31 )
Deafness	3	1.26 ( 0.39 - 4.08 )	1.26 ( 0.15 )	1.24 ( 0.47 )	0.32 ( -1.19 )
Impaired Quality Of Life	3	3.98 ( 1.13 - 13.98 )	3.98 ( 5.44 )	3.42 ( 1.2 )	1.77 ( 0.17 )
Brain Herniation	3	1.26 ( 0.39 - 4.08 )	1.26 ( 0.15 )	1.24 ( 0.47 )	0.32 ( -1.19 )
Vitiligo	3	3.24 ( 0.94 - 11.11 )	3.23 ( 3.9 )	2.88 ( 1.03 )	1.53 ( -0.05 )
Gastroenteritis Norovirus	3	0.66 ( 0.21 - 2.08 )	0.66 ( 0.52 )	0.67 ( 0.25 )	-0.58 ( -2.06 )
Urinary Tract Infection Bacterial	3	0.78 ( 0.25 - 2.49 )	0.78 ( 0.17 )	0.79 ( 0.3 )	-0.33 ( -1.82 )
Restrictive Pulmonary Disease	3	5.75 ( 1.56 - 21.25 )	5.75 ( 8.83 )	4.56 ( 1.53 )	2.19 ( 0.54 )
Haptoglobin Decreased	3	1.48 ( 0.45 - 4.81 )	1.48 ( 0.43 )	1.44 ( 0.54 )	0.53 ( -0.99 )
Therapeutic Response Unexpected	3	3.98 ( 1.13 - 13.98 )	3.98 ( 5.44 )	3.42 ( 1.2 )	1.77 ( 0.17 )
Herpes Simplex Viraemia	3	10.35 ( 2.47 - 43.33 )	10.35 ( 15.84 )	6.84 ( 2.07 )	2.77 ( 1.04 )
Atypical Mycobacterial Infection	3	1.57 ( 0.48 - 5.12 )	1.57 ( 0.57 )	1.52 ( 0.57 )	0.61 ( -0.91 )
Polymyositis	3	8.63 ( 2.16 - 34.5 )	8.63 ( 13.48 )	6.08 ( 1.91 )	2.61 ( 0.9 )
Dysgeusia	3	1.33 ( 0.41 - 4.3 )	1.33 ( 0.22 )	1.3 ( 0.49 )	0.38 ( -1.13 )
Paraplegia	3	3.98 ( 1.13 - 13.98 )	3.98 ( 5.44 )	3.42 ( 1.2 )	1.77 ( 0.17 )
Disseminated Mucormycosis	3	1.4 ( 0.43 - 4.54 )	1.4 ( 0.32 )	1.37 ( 0.51 )	0.45 ( -1.06 )
T-Cell Prolymphocytic Leukaemia	3	8.63 ( 2.16 - 34.5 )	8.63 ( 13.48 )	6.08 ( 1.91 )	2.61 ( 0.9 )
Hepatic Encephalopathy	3	1.06 ( 0.33 - 3.39 )	1.06 ( 0.01 )	1.05 ( 0.4 )	0.07 ( -1.42 )
Compression Fracture	3	8.63 ( 2.16 - 34.5 )	8.63 ( 13.48 )	6.08 ( 1.91 )	2.61 ( 0.9 )
Epstein Barr Virus Positive Mucocutaneous Ulcer	3	7.4 ( 1.91 - 28.6 )	7.39 ( 11.61 )	5.48 ( 1.77 )	2.45 ( 0.77 )
Blood Pressure Increased	3	0.27 ( 0.08 - 0.83 )	0.27 ( 6.01 )	0.28 ( 0.11 )	-1.85 ( -3.31 )
Apnoea	3	3.7 ( 1.06 - 12.87 )	3.7 ( 4.86 )	3.22 ( 1.13 )	1.69 ( 0.09 )
Cholelithiasis	3	0.81 ( 0.25 - 2.57 )	0.81 ( 0.13 )	0.82 ( 0.31 )	-0.29 ( -1.78 )
Dry Eye	3	1.08 ( 0.34 - 3.46 )	1.08 ( 0.02 )	1.07 ( 0.4 )	0.1 ( -1.39 )
Renal Tubular Necrosis	3	0.18 ( 0.06 - 0.57 )	0.18 ( 10.8 )	0.19 ( 0.07 )	-2.38 ( -3.83 )
Blood Creatinine Increased	3	0.05 ( 0.02 - 0.17 )	0.05 ( 48.95 )	0.06 ( 0.02 )	-4.11 ( -5.56 )
Toxic Encephalopathy	3	0.58 ( 0.18 - 1.84 )	0.58 ( 0.87 )	0.6 ( 0.23 )	-0.75 ( -2.22 )
Campylobacter Infection	3	3.05 ( 0.89 - 10.39 )	3.04 ( 3.5 )	2.74 ( 0.98 )	1.45 ( -0.12 )
Urinary Tract Obstruction	3	2.59 ( 0.77 - 8.71 )	2.59 ( 2.54 )	2.38 ( 0.86 )	1.25 ( -0.31 )
Serositis	3	4.71 ( 1.31 - 16.87 )	4.71 ( 6.88 )	3.91 ( 1.34 )	1.97 ( 0.34 )
Disorientation	3	0.39 ( 0.13 - 1.24 )	0.4 ( 2.72 )	0.41 ( 0.16 )	-1.29 ( -2.76 )
Lymphoma	3	0.67 ( 0.21 - 2.13 )	0.67 ( 0.46 )	0.68 ( 0.26 )	-0.55 ( -2.03 )
Cord Colitis Syndrome	3	51.77 ( 5.38 - 497.75 )	51.76 ( 37.33 )	13.69 ( 2.06 )	3.77 ( 1.84 )
Cytomegalovirus Colitis	3	0.31 ( 0.1 - 0.96 )	0.31 ( 4.58 )	0.32 ( 0.12 )	-1.64 ( -3.1 )
Meningitis Aseptic	3	1.92 ( 0.58 - 6.32 )	1.92 ( 1.18 )	1.83 ( 0.67 )	0.87 ( -0.67 )
Ovarian Disorder	3	5.18 ( 1.42 - 18.81 )	5.18 ( 7.77 )	4.21 ( 1.43 )	2.07 ( 0.44 )
Cushingoid	3	1.85 ( 0.56 - 6.08 )	1.85 ( 1.06 )	1.77 ( 0.65 )	0.82 ( -0.71 )
Skin Hypopigmentation	3	4.31 ( 1.22 - 15.29 )	4.31 ( 6.11 )	3.65 ( 1.27 )	1.87 ( 0.25 )
Hyperlipidaemia	3	0.65 ( 0.2 - 2.05 )	0.65 ( 0.56 )	0.66 ( 0.25 )	-0.6 ( -2.08 )
Intervertebral Disc Protrusion	3	3.24 ( 0.94 - 11.11 )	3.23 ( 3.9 )	2.88 ( 1.03 )	1.53 ( -0.05 )
Spinal Stenosis	3	1.29 ( 0.4 - 4.18 )	1.29 ( 0.19 )	1.27 ( 0.48 )	0.35 ( -1.16 )
Autism Spectrum Disorder	3	Inf ( NaN - Inf )	Inf ( 51.76 )	18.25 ( 0 )	4.19 ( 2.15 )
Autoimmune Disorder	3	2.07 ( 0.63 - 6.86 )	2.07 ( 1.48 )	1.96 ( 0.72 )	0.97 ( -0.57 )
Angioimmunoblastic T-Cell Lymphoma	3	6.47 ( 1.72 - 24.4 )	6.47 ( 10.09 )	4.98 ( 1.64 )	2.32 ( 0.65 )
Mucosal Erosion	3	4.31 ( 1.22 - 15.29 )	4.31 ( 6.11 )	3.65 ( 1.27 )	1.87 ( 0.25 )
Mucocutaneous Ulceration	3	51.77 ( 5.38 - 497.75 )	51.76 ( 37.33 )	13.69 ( 2.06 )	3.77 ( 1.84 )
Jejunal Ulcer	3	25.88 ( 4.32 - 154.93 )	25.88 ( 28.7 )	10.95 ( 2.45 )	3.45 ( 1.59 )
Apoptosis	3	6.47 ( 1.72 - 24.4 )	6.47 ( 10.09 )	4.98 ( 1.64 )	2.32 ( 0.65 )
Immune Effector Cell-Associated Neurotoxicity Syndrome	3	0.38 ( 0.12 - 1.2 )	0.38 ( 2.91 )	0.4 ( 0.15 )	-1.33 ( -2.8 )
Pneumonia Parainfluenzae Viral	3	4.31 ( 1.22 - 15.29 )	4.31 ( 6.11 )	3.65 ( 1.27 )	1.87 ( 0.25 )
Visual Field Defect	3	1.85 ( 0.56 - 6.08 )	1.85 ( 1.06 )	1.77 ( 0.65 )	0.82 ( -0.71 )
Lactic Acidosis	3	0.69 ( 0.22 - 2.19 )	0.69 ( 0.4 )	0.7 ( 0.27 )	-0.51 ( -1.99 )
Abdominal Compartment Syndrome	3	3.05 ( 0.89 - 10.39 )	3.04 ( 3.5 )	2.74 ( 0.98 )	1.45 ( -0.12 )
International Normalised Ratio Increased	3	1.33 ( 0.41 - 4.3 )	1.33 ( 0.22 )	1.3 ( 0.49 )	0.38 ( -1.13 )
Respiratory Tract Ulceration	3	51.77 ( 5.38 - 497.75 )	51.76 ( 37.33 )	13.69 ( 2.06 )	3.77 ( 1.84 )
Bk Polyomavirus Test Positive	3	1.73 ( 0.53 - 5.65 )	1.73 ( 0.83 )	1.66 ( 0.61 )	0.73 ( -0.79 )
Therapy Partial Responder	3	0.55 ( 0.17 - 1.74 )	0.55 ( 1.07 )	0.56 ( 0.22 )	-0.82 ( -2.3 )
Subdural Haemorrhage	3	4.31 ( 1.22 - 15.29 )	4.31 ( 6.11 )	3.65 ( 1.27 )	1.87 ( 0.25 )
Red Blood Cell Transfusion	3	6.47 ( 1.72 - 24.4 )	6.47 ( 10.09 )	4.98 ( 1.64 )	2.32 ( 0.65 )
Pancreatic Atrophy	3	6.47 ( 1.72 - 24.4 )	6.47 ( 10.09 )	4.98 ( 1.64 )	2.32 ( 0.65 )
Cytokine Storm	3	2.25 ( 0.68 - 7.5 )	2.25 ( 1.84 )	2.11 ( 0.77 )	1.07 ( -0.47 )
Depressed Level Of Consciousness	3	0.32 ( 0.1 - 0.99 )	0.32 ( 4.38 )	0.33 ( 0.13 )	-1.61 ( -3.07 )
Mental Disorder	3	1.23 ( 0.38 - 3.98 )	1.23 ( 0.12 )	1.22 ( 0.46 )	0.28 ( -1.22 )
Sinus Tachycardia	3	1.1 ( 0.34 - 3.54 )	1.1 ( 0.03 )	1.1 ( 0.41 )	0.13 ( -1.37 )
Retinitis Viral	3	2.72 ( 0.81 - 9.21 )	2.72 ( 2.83 )	2.49 ( 0.9 )	1.32 ( -0.25 )
Sertoli-Cell-Only Syndrome	3	5.75 ( 1.56 - 21.25 )	5.75 ( 8.83 )	4.56 ( 1.53 )	2.19 ( 0.54 )
Metabolic Acidosis	3	0.32 ( 0.1 - 1.01 )	0.32 ( 4.22 )	0.33 ( 0.13 )	-1.58 ( -3.04 )
Oxygen Saturation Decreased	3	0.3 ( 0.1 - 0.95 )	0.3 ( 4.74 )	0.31 ( 0.12 )	-1.67 ( -3.13 )
Mycoplasma Infection	3	3.7 ( 1.06 - 12.87 )	3.7 ( 4.86 )	3.22 ( 1.13 )	1.69 ( 0.09 )
Product Used For Unknown Indication	3	51.77 ( 5.38 - 497.75 )	51.76 ( 37.33 )	13.69 ( 2.06 )	3.77 ( 1.84 )
Hepatitis B	3	0.68 ( 0.21 - 2.16 )	0.68 ( 0.43 )	0.69 ( 0.26 )	-0.53 ( -2.01 )
Supraventricular Tachycardia	3	1.36 ( 0.42 - 4.41 )	1.36 ( 0.27 )	1.34 ( 0.5 )	0.42 ( -1.09 )
Tachypnoea	3	0.56 ( 0.18 - 1.78 )	0.56 ( 0.99 )	0.58 ( 0.22 )	-0.79 ( -2.27 )
Wound	2	1.64 ( 0.39 - 7.01 )	1.64 ( 0.46 )	1.59 ( 0.47 )	0.67 ( -1.1 )
Pneumonia Adenoviral	2	1.08 ( 0.26 - 4.5 )	1.08 ( 0.01 )	1.07 ( 0.32 )	0.1 ( -1.63 )
Oesophagitis	2	0.48 ( 0.12 - 1.95 )	0.48 ( 1.1 )	0.49 ( 0.15 )	-1.02 ( -2.72 )
Graft Loss	2	0.3 ( 0.07 - 1.21 )	0.3 ( 3.21 )	0.31 ( 0.1 )	-1.68 ( -3.37 )
Systemic Inflammatory Response Syndrome	2	0.57 ( 0.14 - 2.35 )	0.58 ( 0.61 )	0.59 ( 0.18 )	-0.76 ( -2.47 )
Gastrointestinal Inflammation	2	0.68 ( 0.16 - 2.78 )	0.68 ( 0.3 )	0.69 ( 0.21 )	-0.54 ( -2.25 )
Adenovirus Test Positive	2	3.83 ( 0.83 - 17.75 )	3.83 ( 3.43 )	3.32 ( 0.92 )	1.73 ( -0.13 )
Haemorrhagic Disorder	2	5.75 ( 1.16 - 28.5 )	5.75 ( 5.89 )	4.56 ( 1.2 )	2.19 ( 0.27 )
Mental Status Changes	2	0.22 ( 0.06 - 0.9 )	0.22 ( 5.31 )	0.23 ( 0.07 )	-2.1 ( -3.78 )
Haemolysis	2	0.29 ( 0.07 - 1.17 )	0.29 ( 3.42 )	0.3 ( 0.09 )	-1.73 ( -3.42 )
Gastric Antral Vascular Ectasia	2	4.93 ( 1.02 - 23.73 )	4.93 ( 4.87 )	4.06 ( 1.09 )	2.02 ( 0.12 )
Paralysis	2	1.23 ( 0.29 - 5.17 )	1.23 ( 0.08 )	1.22 ( 0.37 )	0.28 ( -1.46 )
Hyperthermia	2	0.57 ( 0.14 - 2.31 )	0.57 ( 0.65 )	0.58 ( 0.18 )	-0.79 ( -2.49 )
Inflammatory Pseudotumour	2	17.25 ( 2.43 - 122.51 )	17.25 ( 15.31 )	9.13 ( 1.77 )	3.19 ( 1.08 )
Bone Lesion	2	1.92 ( 0.44 - 8.26 )	1.92 ( 0.79 )	1.83 ( 0.54 )	0.87 ( -0.91 )
Cataract	2	0.4 ( 0.1 - 1.63 )	0.4 ( 1.75 )	0.41 ( 0.13 )	-1.27 ( -2.96 )
Subarachnoid Haemorrhage	2	0.7 ( 0.17 - 2.9 )	0.7 ( 0.24 )	0.72 ( 0.22 )	-0.48 ( -2.2 )
Presyncope	2	0.73 ( 0.18 - 3.02 )	0.73 ( 0.18 )	0.74 ( 0.23 )	-0.42 ( -2.14 )
Osteoporosis	2	0.58 ( 0.14 - 2.39 )	0.58 ( 0.57 )	0.6 ( 0.18 )	-0.74 ( -2.45 )
Adenocarcinoma Pancreas	2	5.75 ( 1.16 - 28.5 )	5.75 ( 5.89 )	4.56 ( 1.2 )	2.19 ( 0.27 )
Pollakiuria	2	0.86 ( 0.21 - 3.57 )	0.86 ( 0.04 )	0.87 ( 0.26 )	-0.2 ( -1.93 )
Norovirus Test Positive	2	4.93 ( 1.02 - 23.73 )	4.93 ( 4.87 )	4.06 ( 1.09 )	2.02 ( 0.12 )
Malnutrition	2	0.45 ( 0.11 - 1.82 )	0.45 ( 1.33 )	0.46 ( 0.14 )	-1.11 ( -2.81 )
Rhabdomyolysis	2	0.27 ( 0.07 - 1.11 )	0.27 ( 3.79 )	0.29 ( 0.09 )	-1.81 ( -3.5 )
Dysphagia	2	0.2 ( 0.05 - 0.81 )	0.2 ( 6.25 )	0.21 ( 0.07 )	-2.24 ( -3.93 )
Skin Irritation	2	11.5 ( 1.92 - 68.85 )	11.5 ( 11.51 )	7.3 ( 1.63 )	2.87 ( 0.83 )
Tooth Malformation	2	8.63 ( 1.58 - 47.11 )	8.63 ( 8.99 )	6.08 ( 1.47 )	2.61 ( 0.61 )
Follicular Thyroid Cancer	2	34.51 ( 3.13 - 380.63 )	34.5 ( 21.69 )	12.17 ( 1.63 )	3.61 ( 1.4 )
Graft Versus Host Disease In Eye	2	0.44 ( 0.11 - 1.8 )	0.44 ( 1.37 )	0.46 ( 0.14 )	-1.13 ( -2.83 )
Pain In Extremity	2	0.19 ( 0.05 - 0.75 )	0.19 ( 6.97 )	0.2 ( 0.06 )	-2.35 ( -4.03 )
Back Pain	2	0.19 ( 0.05 - 0.76 )	0.19 ( 6.92 )	0.2 ( 0.06 )	-2.34 ( -4.02 )
Dental Caries	2	4.31 ( 0.92 - 20.32 )	4.31 ( 4.07 )	3.65 ( 1 )	1.87 ( -0.01 )
Hypomagnesaemia	2	0.34 ( 0.09 - 1.4 )	0.35 ( 2.44 )	0.36 ( 0.11 )	-1.48 ( -3.17 )
Oral Lichen Planus	2	5.75 ( 1.16 - 28.5 )	5.75 ( 5.89 )	4.56 ( 1.2 )	2.19 ( 0.27 )
Ileus Paralytic	2	1.01 ( 0.24 - 4.22 )	1.01 ( 0 )	1.01 ( 0.31 )	0.02 ( -1.71 )
Sinusitis Bacterial	2	2.46 ( 0.56 - 10.85 )	2.46 ( 1.52 )	2.28 ( 0.66 )	1.19 ( -0.62 )
Small Intestinal Obstruction	2	0.63 ( 0.15 - 2.57 )	0.63 ( 0.43 )	0.64 ( 0.2 )	-0.64 ( -2.35 )
Blindness	2	0.33 ( 0.08 - 1.34 )	0.33 ( 2.64 )	0.34 ( 0.11 )	-1.54 ( -3.23 )
Keratitis	2	2.03 ( 0.47 - 8.79 )	2.03 ( 0.93 )	1.92 ( 0.56 )	0.94 ( -0.84 )
Hallucination, Visual	2	0.75 ( 0.18 - 3.09 )	0.75 ( 0.16 )	0.76 ( 0.23 )	-0.39 ( -2.11 )
Hepatic Steatosis	2	0.42 ( 0.1 - 1.71 )	0.42 ( 1.56 )	0.43 ( 0.13 )	-1.2 ( -2.9 )
Weight Decreased	2	0.09 ( 0.02 - 0.35 )	0.09 ( 18.84 )	0.09 ( 0.03 )	-3.43 ( -5.1 )
Oral Candidiasis	2	0.47 ( 0.11 - 1.9 )	0.47 ( 1.19 )	0.48 ( 0.15 )	-1.06 ( -2.76 )
Renal Tubular Disorder	2	0.61 ( 0.15 - 2.48 )	0.61 ( 0.5 )	0.62 ( 0.19 )	-0.69 ( -2.4 )
Petechiae	2	0.66 ( 0.16 - 2.72 )	0.66 ( 0.33 )	0.68 ( 0.21 )	-0.56 ( -2.28 )
Conjunctivitis	2	0.66 ( 0.16 - 2.72 )	0.66 ( 0.33 )	0.68 ( 0.21 )	-0.56 ( -2.28 )
Neoplasm	2	0.86 ( 0.21 - 3.57 )	0.86 ( 0.04 )	0.87 ( 0.26 )	-0.2 ( -1.93 )
Respiratory Tract Infection Fungal	2	0.88 ( 0.21 - 3.66 )	0.88 ( 0.03 )	0.89 ( 0.27 )	-0.17 ( -1.89 )
Renal Haemorrhage	2	1.82 ( 0.42 - 7.8 )	1.82 ( 0.66 )	1.74 ( 0.51 )	0.8 ( -0.98 )
Hepatic Vein Occlusion	2	0.99 ( 0.24 - 4.1 )	0.99 ( 0 )	0.99 ( 0.3 )	-0.02 ( -1.75 )
Autoimmune Lymphoproliferative Syndrome	2	8.63 ( 1.58 - 47.11 )	8.63 ( 8.99 )	6.08 ( 1.47 )	2.61 ( 0.61 )
Dedifferentiated Liposarcoma	2	4.93 ( 1.02 - 23.73 )	4.93 ( 4.87 )	4.06 ( 1.09 )	2.02 ( 0.12 )
Asthenia	2	0.08 ( 0.02 - 0.32 )	0.08 ( 21.32 )	0.08 ( 0.03 )	-3.58 ( -5.25 )
Night Sweats	2	1.11 ( 0.27 - 4.65 )	1.11 ( 0.02 )	1.11 ( 0.33 )	0.15 ( -1.59 )
Left Ventricular Failure	2	1.64 ( 0.39 - 7.01 )	1.64 ( 0.46 )	1.59 ( 0.47 )	0.67 ( -1.1 )
Klebsiella Test Positive	2	2.65 ( 0.6 - 11.76 )	2.65 ( 1.79 )	2.43 ( 0.7 )	1.28 ( -0.53 )
Actinic Keratosis	2	0.26 ( 0.06 - 1.05 )	0.26 ( 4.17 )	0.27 ( 0.08 )	-1.89 ( -3.57 )
Nasopharyngitis	2	0.26 ( 0.07 - 1.06 )	0.26 ( 4.06 )	0.27 ( 0.09 )	-1.87 ( -3.55 )
Ureaplasma Infection	2	1.33 ( 0.31 - 5.59 )	1.33 ( 0.15 )	1.3 ( 0.39 )	0.38 ( -1.37 )
Long Qt Syndrome	2	3.45 ( 0.76 - 15.75 )	3.45 ( 2.9 )	3.04 ( 0.85 )	1.61 ( -0.24 )
Ventricular Fibrillation	2	1.19 ( 0.28 - 4.99 )	1.19 ( 0.06 )	1.18 ( 0.35 )	0.24 ( -1.51 )
Infertility Female	2	11.5 ( 1.92 - 68.85 )	11.5 ( 11.51 )	7.3 ( 1.63 )	2.87 ( 0.83 )
Ovarian Cyst	2	0.15 ( 0.04 - 0.62 )	0.15 ( 9.22 )	0.16 ( 0.05 )	-2.63 ( -4.31 )
Hypertensive Crisis	2	1.19 ( 0.28 - 4.99 )	1.19 ( 0.06 )	1.18 ( 0.35 )	0.24 ( -1.51 )
Eccrine Squamous Syringometaplasia	2	8.63 ( 1.58 - 47.11 )	8.63 ( 8.99 )	6.08 ( 1.47 )	2.61 ( 0.61 )
Vascular Malformation	2	8.63 ( 1.58 - 47.11 )	8.63 ( 8.99 )	6.08 ( 1.47 )	2.61 ( 0.61 )
Concomitant Disease Aggravated	2	2.3 ( 0.53 - 10.06 )	2.3 ( 1.3 )	2.15 ( 0.62 )	1.1 ( -0.7 )
Herpes Simplex Test Positive	2	3.45 ( 0.76 - 15.75 )	3.45 ( 2.9 )	3.04 ( 0.85 )	1.61 ( -0.24 )
Nodular Melanoma	2	6.9 ( 1.34 - 35.58 )	6.9 ( 7.21 )	5.21 ( 1.32 )	2.38 ( 0.43 )
Pneumonia Aspiration	2	0.52 ( 0.13 - 2.13 )	0.52 ( 0.85 )	0.54 ( 0.17 )	-0.9 ( -2.6 )
Brain Stem Syndrome	2	6.9 ( 1.34 - 35.58 )	6.9 ( 7.21 )	5.21 ( 1.32 )	2.38 ( 0.43 )
Generalised Tonic-Clonic Seizure	2	0.51 ( 0.12 - 2.07 )	0.51 ( 0.93 )	0.52 ( 0.16 )	-0.94 ( -2.64 )
Hyperammonaemic Encephalopathy	2	3.14 ( 0.7 - 14.16 )	3.14 ( 2.46 )	2.81 ( 0.8 )	1.49 ( -0.35 )
Hyperventilation	2	4.93 ( 1.02 - 23.73 )	4.93 ( 4.87 )	4.06 ( 1.09 )	2.02 ( 0.12 )
Respiratory Alkalosis	2	3.83 ( 0.83 - 17.75 )	3.83 ( 3.43 )	3.32 ( 0.92 )	1.73 ( -0.13 )
Unresponsive To Stimuli	2	0.91 ( 0.22 - 3.76 )	0.91 ( 0.02 )	0.91 ( 0.28 )	-0.13 ( -1.86 )
Underdose	2	1.28 ( 0.3 - 5.37 )	1.28 ( 0.11 )	1.26 ( 0.38 )	0.33 ( -1.42 )
Hepatitis C	2	0.26 ( 0.07 - 1.06 )	0.26 ( 4.06 )	0.27 ( 0.09 )	-1.87 ( -3.55 )
Moraxella Infection	2	2.65 ( 0.6 - 11.76 )	2.65 ( 1.79 )	2.43 ( 0.7 )	1.28 ( -0.53 )
Renal Cell Carcinoma	2	0.68 ( 0.16 - 2.78 )	0.68 ( 0.3 )	0.69 ( 0.21 )	-0.54 ( -2.25 )
Neoplasm Malignant	2	0.13 ( 0.03 - 0.54 )	0.13 ( 11.09 )	0.14 ( 0.04 )	-2.83 ( -4.5 )
Product Deposit	2	34.51 ( 3.13 - 380.63 )	34.5 ( 21.69 )	12.17 ( 1.63 )	3.61 ( 1.4 )
Blood Gonadotrophin Increased	2	34.51 ( 3.13 - 380.63 )	34.5 ( 21.69 )	12.17 ( 1.63 )	3.61 ( 1.4 )
Hepatic Atrophy	2	5.75 ( 1.16 - 28.5 )	5.75 ( 5.89 )	4.56 ( 1.2 )	2.19 ( 0.27 )
Hydrocephalus	2	0.73 ( 0.18 - 3.02 )	0.73 ( 0.18 )	0.74 ( 0.23 )	-0.42 ( -2.14 )
Graft Versus Host Disease In Lung	2	0.3 ( 0.07 - 1.21 )	0.3 ( 3.21 )	0.31 ( 0.1 )	-1.68 ( -3.37 )
Deafness Neurosensory	2	2.65 ( 0.6 - 11.76 )	2.65 ( 1.79 )	2.43 ( 0.7 )	1.28 ( -0.53 )
Hyperferritinaemia	2	3.14 ( 0.7 - 14.16 )	3.14 ( 2.46 )	2.81 ( 0.8 )	1.49 ( -0.35 )
Drug Ineffective For Unapproved Indication	2	0.09 ( 0.02 - 0.37 )	0.09 ( 17.92 )	0.1 ( 0.03 )	-3.37 ( -5.04 )
Sinusitis	2	0.26 ( 0.06 - 1.05 )	0.26 ( 4.17 )	0.27 ( 0.08 )	-1.89 ( -3.57 )
Endocarditis	2	0.53 ( 0.13 - 2.17 )	0.53 ( 0.8 )	0.54 ( 0.17 )	-0.88 ( -2.58 )
Soft Tissue Infection	2	0.82 ( 0.2 - 3.39 )	0.82 ( 0.07 )	0.83 ( 0.25 )	-0.27 ( -1.99 )
Venous Thrombosis	2	1.01 ( 0.24 - 4.22 )	1.01 ( 0 )	1.01 ( 0.31 )	0.02 ( -1.71 )
Sinusitis Fungal	2	1.64 ( 0.39 - 7.01 )	1.64 ( 0.46 )	1.59 ( 0.47 )	0.67 ( -1.1 )
Paternal Exposure Before Pregnancy	2	17.25 ( 2.43 - 122.51 )	17.25 ( 15.31 )	9.13 ( 1.77 )	3.19 ( 1.08 )
Osteomyelitis	2	0.55 ( 0.13 - 2.24 )	0.55 ( 0.72 )	0.56 ( 0.17 )	-0.83 ( -2.54 )
Cryptosporidiosis Infection	2	0.91 ( 0.22 - 3.76 )	0.91 ( 0.02 )	0.91 ( 0.28 )	-0.13 ( -1.86 )
Fanconi Syndrome	2	2.16 ( 0.5 - 9.38 )	2.16 ( 1.1 )	2.03 ( 0.59 )	1.02 ( -0.77 )
Abortion Spontaneous	2	0.44 ( 0.11 - 1.8 )	0.44 ( 1.37 )	0.46 ( 0.14 )	-1.13 ( -2.83 )
Autoimmune Enteropathy	2	34.51 ( 3.13 - 380.63 )	34.5 ( 21.69 )	12.17 ( 1.63 )	3.61 ( 1.4 )
Glomerulonephritis	2	0.63 ( 0.15 - 2.57 )	0.63 ( 0.43 )	0.64 ( 0.2 )	-0.64 ( -2.35 )
Corynebacterium Infection	2	2.03 ( 0.47 - 8.79 )	2.03 ( 0.93 )	1.92 ( 0.56 )	0.94 ( -0.84 )
Cytomegalovirus Enterocolitis	2	0.56 ( 0.14 - 2.28 )	0.56 ( 0.68 )	0.57 ( 0.18 )	-0.81 ( -2.51 )
Lower Respiratory Tract Infection Fungal	2	3.45 ( 0.76 - 15.75 )	3.45 ( 2.9 )	3.04 ( 0.85 )	1.61 ( -0.24 )
Retinal Haemorrhage	2	0.66 ( 0.16 - 2.72 )	0.66 ( 0.33 )	0.68 ( 0.21 )	-0.56 ( -2.28 )
Microangiopathy	2	0.53 ( 0.13 - 2.17 )	0.53 ( 0.8 )	0.54 ( 0.17 )	-0.88 ( -2.58 )
Periorbital Oedema	2	3.45 ( 0.76 - 15.75 )	3.45 ( 2.9 )	3.04 ( 0.85 )	1.61 ( -0.24 )
Streptococcal Infection	2	0.63 ( 0.15 - 2.57 )	0.63 ( 0.43 )	0.64 ( 0.2 )	-0.64 ( -2.35 )
Lung Neoplasm Malignant	2	0.54 ( 0.13 - 2.2 )	0.54 ( 0.76 )	0.55 ( 0.17 )	-0.85 ( -2.56 )
Blood Urea Increased	2	0.16 ( 0.04 - 0.66 )	0.17 ( 8.37 )	0.17 ( 0.05 )	-2.53 ( -4.21 )
Hypovolaemic Shock	2	1.38 ( 0.33 - 5.83 )	1.38 ( 0.19 )	1.35 ( 0.41 )	0.44 ( -1.32 )
Acute Polyneuropathy	2	8.63 ( 1.58 - 47.11 )	8.63 ( 8.99 )	6.08 ( 1.47 )	2.61 ( 0.61 )
Myoclonus	2	0.59 ( 0.15 - 2.44 )	0.59 ( 0.53 )	0.61 ( 0.19 )	-0.72 ( -2.42 )
Smooth Muscle Cell Neoplasm	2	0.8 ( 0.19 - 3.31 )	0.8 ( 0.09 )	0.81 ( 0.25 )	-0.3 ( -2.02 )
Haemorrhagic Diathesis	2	3.83 ( 0.83 - 17.75 )	3.83 ( 3.43 )	3.32 ( 0.92 )	1.73 ( -0.13 )
Anaphylactic Reaction	2	0.5 ( 0.12 - 2.04 )	0.5 ( 0.97 )	0.51 ( 0.16 )	-0.96 ( -2.66 )
Tumour Lysis Syndrome	2	0.84 ( 0.2 - 3.48 )	0.84 ( 0.06 )	0.85 ( 0.26 )	-0.24 ( -1.96 )
Lymphocyte Count Decreased	2	0.29 ( 0.07 - 1.17 )	0.29 ( 3.42 )	0.3 ( 0.09 )	-1.73 ( -3.42 )
Arthritis Bacterial	2	1.23 ( 0.29 - 5.17 )	1.23 ( 0.08 )	1.22 ( 0.37 )	0.28 ( -1.46 )
Parvovirus B19 Infection	2	0.41 ( 0.1 - 1.67 )	0.41 ( 1.65 )	0.42 ( 0.13 )	-1.24 ( -2.93 )
Proctalgia	2	1.23 ( 0.29 - 5.17 )	1.23 ( 0.08 )	1.22 ( 0.37 )	0.28 ( -1.46 )
Cerebral Calcification	2	34.51 ( 3.13 - 380.63 )	34.5 ( 21.69 )	12.17 ( 1.63 )	3.61 ( 1.4 )
Protein-Losing Gastroenteropathy	2	2.3 ( 0.53 - 10.06 )	2.3 ( 1.3 )	2.15 ( 0.62 )	1.1 ( -0.7 )
Nephrocalcinosis	2	4.93 ( 1.02 - 23.73 )	4.93 ( 4.87 )	4.06 ( 1.09 )	2.02 ( 0.12 )
Chronic Graft Versus Host Disease In Intestine	2	0.58 ( 0.14 - 2.39 )	0.58 ( 0.57 )	0.6 ( 0.18 )	-0.74 ( -2.45 )
Haematoma	2	0.33 ( 0.08 - 1.36 )	0.33 ( 2.59 )	0.35 ( 0.11 )	-1.52 ( -3.21 )
Rotavirus Infection	2	1.64 ( 0.39 - 7.01 )	1.64 ( 0.46 )	1.59 ( 0.47 )	0.67 ( -1.1 )
Mycobacterium Kansasii Infection	2	2.65 ( 0.6 - 11.76 )	2.65 ( 1.79 )	2.43 ( 0.7 )	1.28 ( -0.53 )
Cytokine Abnormal	2	Inf ( NaN - Inf )	Inf ( 34.5 )	18.25 ( 0 )	4.19 ( 1.83 )
Heart Rate Increased	2	0.45 ( 0.11 - 1.85 )	0.45 ( 1.28 )	0.47 ( 0.14 )	-1.1 ( -2.79 )
Hyperpyrexia	2	2.88 ( 0.64 - 12.85 )	2.88 ( 2.1 )	2.61 ( 0.75 )	1.38 ( -0.44 )
Nystagmus	2	1.33 ( 0.31 - 5.59 )	1.33 ( 0.15 )	1.3 ( 0.39 )	0.38 ( -1.37 )
Chills	2	0.13 ( 0.03 - 0.52 )	0.13 ( 11.72 )	0.14 ( 0.04 )	-2.89 ( -4.56 )
Flushing	2	0.69 ( 0.17 - 2.84 )	0.69 ( 0.27 )	0.7 ( 0.22 )	-0.51 ( -2.22 )
Peripheral Swelling	2	0.34 ( 0.09 - 1.4 )	0.35 ( 2.44 )	0.36 ( 0.11 )	-1.48 ( -3.17 )
Alveolar Proteinosis	2	1.73 ( 0.4 - 7.38 )	1.73 ( 0.55 )	1.66 ( 0.49 )	0.73 ( -1.04 )
Iron Overload	2	1.57 ( 0.37 - 6.67 )	1.57 ( 0.38 )	1.52 ( 0.45 )	0.61 ( -1.16 )
Encephalomyelitis	2	2.65 ( 0.6 - 11.76 )	2.65 ( 1.79 )	2.43 ( 0.7 )	1.28 ( -0.53 )
Hypoacusis	2	1.33 ( 0.31 - 5.59 )	1.33 ( 0.15 )	1.3 ( 0.39 )	0.38 ( -1.37 )
Otitis Media	2	1.92 ( 0.44 - 8.26 )	1.92 ( 0.79 )	1.83 ( 0.54 )	0.87 ( -0.91 )
Dysbiosis	2	1.92 ( 0.44 - 8.26 )	1.92 ( 0.79 )	1.83 ( 0.54 )	0.87 ( -0.91 )
Adenomatous Polyposis Coli	2	5.75 ( 1.16 - 28.5 )	5.75 ( 5.89 )	4.56 ( 1.2 )	2.19 ( 0.27 )
Eye Pain	2	0.82 ( 0.2 - 3.39 )	0.82 ( 0.07 )	0.83 ( 0.25 )	-0.27 ( -1.99 )
Hypercholesterolaemia	2	1.05 ( 0.25 - 4.36 )	1.05 ( 0 )	1.04 ( 0.32 )	0.06 ( -1.67 )
Lichenoid Keratosis	2	1.64 ( 0.39 - 7.01 )	1.64 ( 0.46 )	1.59 ( 0.47 )	0.67 ( -1.1 )
Meningioma	2	2.88 ( 0.64 - 12.85 )	2.88 ( 2.1 )	2.61 ( 0.75 )	1.38 ( -0.44 )
Poikiloderma	2	2.65 ( 0.6 - 11.76 )	2.65 ( 1.79 )	2.43 ( 0.7 )	1.28 ( -0.53 )
Reticulocytosis	2	1.73 ( 0.4 - 7.38 )	1.73 ( 0.55 )	1.66 ( 0.49 )	0.73 ( -1.04 )
Skin Hypertrophy	2	1.73 ( 0.4 - 7.38 )	1.73 ( 0.55 )	1.66 ( 0.49 )	0.73 ( -1.04 )
Chronic Graft Versus Host Disease In Eye	2	1.01 ( 0.24 - 4.22 )	1.01 ( 0 )	1.01 ( 0.31 )	0.02 ( -1.71 )
Pure White Cell Aplasia	2	34.51 ( 3.13 - 380.63 )	34.5 ( 21.69 )	12.17 ( 1.63 )	3.61 ( 1.4 )
Pleurisy	2	0.99 ( 0.24 - 4.1 )	0.99 ( 0 )	0.99 ( 0.3 )	-0.02 ( -1.75 )
Mania	2	2.65 ( 0.6 - 11.76 )	2.65 ( 1.79 )	2.43 ( 0.7 )	1.28 ( -0.53 )
Oligospermia	2	34.51 ( 3.13 - 380.63 )	34.5 ( 21.69 )	12.17 ( 1.63 )	3.61 ( 1.4 )
Inflammatory Myofibroblastic Tumour	2	8.63 ( 1.58 - 47.11 )	8.63 ( 8.99 )	6.08 ( 1.47 )	2.61 ( 0.61 )
Multi-Organ Disorder	2	1.57 ( 0.37 - 6.67 )	1.57 ( 0.38 )	1.52 ( 0.45 )	0.61 ( -1.16 )
Oesophageal Squamous Cell Carcinoma	2	3.83 ( 0.83 - 17.75 )	3.83 ( 3.43 )	3.32 ( 0.92 )	1.73 ( -0.13 )
Small Cell Lung Cancer	2	3.83 ( 0.83 - 17.75 )	3.83 ( 3.43 )	3.32 ( 0.92 )	1.73 ( -0.13 )
Fanconi Syndrome Acquired	2	4.31 ( 0.92 - 20.32 )	4.31 ( 4.07 )	3.65 ( 1 )	1.87 ( -0.01 )
Intestinal Stenosis	2	34.51 ( 3.13 - 380.63 )	34.5 ( 21.69 )	12.17 ( 1.63 )	3.61 ( 1.4 )
Urinary Retention	2	0.47 ( 0.11 - 1.9 )	0.47 ( 1.19 )	0.48 ( 0.15 )	-1.06 ( -2.76 )
Chronic Respiratory Disease	2	17.25 ( 2.43 - 122.51 )	17.25 ( 15.31 )	9.13 ( 1.77 )	3.19 ( 1.08 )
Growth Disorder	2	34.51 ( 3.13 - 380.63 )	34.5 ( 21.69 )	12.17 ( 1.63 )	3.61 ( 1.4 )
Polyomavirus-Associated Nephropathy	2	0.09 ( 0.02 - 0.37 )	0.09 ( 17.51 )	0.1 ( 0.03 )	-3.35 ( -5.02 )
Pleuroparenchymal Fibroelastosis	2	17.25 ( 2.43 - 122.51 )	17.25 ( 15.31 )	9.13 ( 1.77 )	3.19 ( 1.08 )
Varices Oesophageal	2	3.83 ( 0.83 - 17.75 )	3.83 ( 3.43 )	3.32 ( 0.92 )	1.73 ( -0.13 )
Memory Impairment	2	0.27 ( 0.07 - 1.11 )	0.27 ( 3.79 )	0.29 ( 0.09 )	-1.81 ( -3.5 )
Parasitic Pneumonia	2	17.25 ( 2.43 - 122.51 )	17.25 ( 15.31 )	9.13 ( 1.77 )	3.19 ( 1.08 )
Toxocariasis	2	34.51 ( 3.13 - 380.63 )	34.5 ( 21.69 )	12.17 ( 1.63 )	3.61 ( 1.4 )
Atrial Thrombosis	2	3.83 ( 0.83 - 17.75 )	3.83 ( 3.43 )	3.32 ( 0.92 )	1.73 ( -0.13 )
Hypoglycaemia	2	0.56 ( 0.14 - 2.28 )	0.56 ( 0.68 )	0.57 ( 0.18 )	-0.81 ( -2.51 )
Pancreatitis	2	0.25 ( 0.06 - 1 )	0.25 ( 4.49 )	0.26 ( 0.08 )	-1.95 ( -3.63 )
Short Stature	2	2.16 ( 0.5 - 9.38 )	2.16 ( 1.1 )	2.03 ( 0.59 )	1.02 ( -0.77 )
Herpes Simplex Reactivation	2	1.64 ( 0.39 - 7.01 )	1.64 ( 0.46 )	1.59 ( 0.47 )	0.67 ( -1.1 )
Superinfection Bacterial	2	1.05 ( 0.25 - 4.36 )	1.05 ( 0 )	1.04 ( 0.32 )	0.06 ( -1.67 )
Red Blood Cell Sedimentation Rate Increased	2	2.46 ( 0.56 - 10.85 )	2.46 ( 1.52 )	2.28 ( 0.66 )	1.19 ( -0.62 )
Joint Effusion	2	3.83 ( 0.83 - 17.75 )	3.83 ( 3.43 )	3.32 ( 0.92 )	1.73 ( -0.13 )
Still'S Disease	2	2.3 ( 0.53 - 10.06 )	2.3 ( 1.3 )	2.15 ( 0.62 )	1.1 ( -0.7 )
Osteopenia	2	0.66 ( 0.16 - 2.72 )	0.66 ( 0.33 )	0.68 ( 0.21 )	-0.56 ( -2.28 )
Secondary Adrenocortical Insufficiency	2	4.31 ( 0.92 - 20.32 )	4.31 ( 4.07 )	3.65 ( 1 )	1.87 ( -0.01 )
Duodenal Ulcer Haemorrhage	2	2.03 ( 0.47 - 8.79 )	2.03 ( 0.93 )	1.92 ( 0.56 )	0.94 ( -0.84 )
Transplantation Associated Food Allergy	2	11.5 ( 1.92 - 68.85 )	11.5 ( 11.51 )	7.3 ( 1.63 )	2.87 ( 0.83 )
Epstein-Barr Virus Test Positive	2	0.91 ( 0.22 - 3.76 )	0.91 ( 0.02 )	0.91 ( 0.28 )	-0.13 ( -1.86 )
Endothelial Dysfunction	2	2.88 ( 0.64 - 12.85 )	2.88 ( 2.1 )	2.61 ( 0.75 )	1.38 ( -0.44 )
Human Herpesvirus 8 Infection	2	0.68 ( 0.16 - 2.78 )	0.68 ( 0.3 )	0.69 ( 0.21 )	-0.54 ( -2.25 )
Human Herpesvirus 7 Infection	2	3.14 ( 0.7 - 14.16 )	3.14 ( 2.46 )	2.81 ( 0.8 )	1.49 ( -0.35 )
Myelitis	2	1.15 ( 0.27 - 4.81 )	1.15 ( 0.04 )	1.14 ( 0.34 )	0.19 ( -1.55 )
Necrotising Fasciitis	2	1.28 ( 0.3 - 5.37 )	1.28 ( 0.11 )	1.26 ( 0.38 )	0.33 ( -1.42 )
Demyelinating Polyneuropathy	2	1.38 ( 0.33 - 5.83 )	1.38 ( 0.19 )	1.35 ( 0.41 )	0.44 ( -1.32 )
Immunodeficiency	2	0.58 ( 0.14 - 2.39 )	0.58 ( 0.57 )	0.6 ( 0.18 )	-0.74 ( -2.45 )
Varicella	2	0.73 ( 0.18 - 3.02 )	0.73 ( 0.18 )	0.74 ( 0.23 )	-0.42 ( -2.14 )
Duodenitis	2	1.44 ( 0.34 - 6.08 )	1.44 ( 0.25 )	1.4 ( 0.42 )	0.49 ( -1.27 )
Donor Specific Antibody Present	2	1.01 ( 0.24 - 4.22 )	1.01 ( 0 )	1.01 ( 0.31 )	0.02 ( -1.71 )
Microangiopathic Haemolytic Anaemia	2	0.8 ( 0.19 - 3.31 )	0.8 ( 0.09 )	0.81 ( 0.25 )	-0.3 ( -2.02 )
Acquired Haemophilia	2	3.14 ( 0.7 - 14.16 )	3.14 ( 2.46 )	2.81 ( 0.8 )	1.49 ( -0.35 )
Refractoriness To Platelet Transfusion	2	2.3 ( 0.53 - 10.06 )	2.3 ( 1.3 )	2.15 ( 0.62 )	1.1 ( -0.7 )
Oral Herpes	2	0.45 ( 0.11 - 1.82 )	0.45 ( 1.33 )	0.46 ( 0.14 )	-1.11 ( -2.81 )
Pneumonia Streptococcal	2	1.38 ( 0.33 - 5.83 )	1.38 ( 0.19 )	1.35 ( 0.41 )	0.44 ( -1.32 )
Multisystem Inflammatory Syndrome In Children	2	5.75 ( 1.16 - 28.5 )	5.75 ( 5.89 )	4.56 ( 1.2 )	2.19 ( 0.27 )
Ataxia	2	0.91 ( 0.22 - 3.76 )	0.91 ( 0.02 )	0.91 ( 0.28 )	-0.13 ( -1.86 )
Gingivitis	2	4.31 ( 0.92 - 20.32 )	4.31 ( 4.07 )	3.65 ( 1 )	1.87 ( -0.01 )
Oesophageal Carcinoma	2	0.68 ( 0.16 - 2.78 )	0.68 ( 0.3 )	0.69 ( 0.21 )	-0.54 ( -2.25 )
Ammonia Increased	2	5.75 ( 1.16 - 28.5 )	5.75 ( 5.89 )	4.56 ( 1.2 )	2.19 ( 0.27 )
Ct Hypotension Complex	2	Inf ( NaN - Inf )	Inf ( 34.5 )	18.25 ( 0 )	4.19 ( 1.83 )
Pulseless Electrical Activity	2	1.33 ( 0.31 - 5.59 )	1.33 ( 0.15 )	1.3 ( 0.39 )	0.38 ( -1.37 )
Inflammatory Marker Increased	2	0.56 ( 0.14 - 2.28 )	0.56 ( 0.68 )	0.57 ( 0.18 )	-0.81 ( -2.51 )
Intestinal Dilatation	2	5.75 ( 1.16 - 28.5 )	5.75 ( 5.89 )	4.56 ( 1.2 )	2.19 ( 0.27 )
Flatulence	2	1.5 ( 0.35 - 6.36 )	1.5 ( 0.31 )	1.46 ( 0.44 )	0.55 ( -1.21 )
Metapneumovirus Pneumonia	2	11.5 ( 1.92 - 68.85 )	11.5 ( 11.51 )	7.3 ( 1.63 )	2.87 ( 0.83 )
Cytomegalovirus Gastroenteritis	2	1.15 ( 0.27 - 4.81 )	1.15 ( 0.04 )	1.14 ( 0.34 )	0.19 ( -1.55 )
Sinusitis Aspergillus	2	8.63 ( 1.58 - 47.11 )	8.63 ( 8.99 )	6.08 ( 1.47 )	2.61 ( 0.61 )
Enterovirus Infection	2	1.11 ( 0.27 - 4.65 )	1.11 ( 0.02 )	1.11 ( 0.33 )	0.15 ( -1.59 )
Extensor Plantar Response	2	2.3 ( 0.53 - 10.06 )	2.3 ( 1.3 )	2.15 ( 0.62 )	1.1 ( -0.7 )
Odynophagia	2	0.68 ( 0.16 - 2.78 )	0.68 ( 0.3 )	0.69 ( 0.21 )	-0.54 ( -2.25 )
Congenital Aplasia	2	1.82 ( 0.42 - 7.8 )	1.82 ( 0.66 )	1.74 ( 0.51 )	0.8 ( -0.98 )
Leukopenia	2	0.05 ( 0.01 - 0.2 )	0.05 ( 36.69 )	0.05 ( 0.02 )	-4.27 ( -5.93 )
Azotaemia	2	0.86 ( 0.21 - 3.57 )	0.86 ( 0.04 )	0.87 ( 0.26 )	-0.2 ( -1.93 )
Kidney Small	2	34.51 ( 3.13 - 380.63 )	34.5 ( 21.69 )	12.17 ( 1.63 )	3.61 ( 1.4 )
Cholangitis	2	0.39 ( 0.1 - 1.57 )	0.39 ( 1.89 )	0.4 ( 0.12 )	-1.32 ( -3.01 )
Muscle Fatigue	2	11.5 ( 1.92 - 68.85 )	11.5 ( 11.51 )	7.3 ( 1.63 )	2.87 ( 0.83 )
Myocardial Injury	2	34.51 ( 3.13 - 380.63 )	34.5 ( 21.69 )	12.17 ( 1.63 )	3.61 ( 1.4 )
Serratia Sepsis	2	2.88 ( 0.64 - 12.85 )	2.88 ( 2.1 )	2.61 ( 0.75 )	1.38 ( -0.44 )
Stupor	2	1.92 ( 0.44 - 8.26 )	1.92 ( 0.79 )	1.83 ( 0.54 )	0.87 ( -0.91 )
Liver Function Test Increased	2	1.01 ( 0.24 - 4.22 )	1.01 ( 0 )	1.01 ( 0.31 )	0.02 ( -1.71 )
Blood Testosterone Decreased	2	3.45 ( 0.76 - 15.75 )	3.45 ( 2.9 )	3.04 ( 0.85 )	1.61 ( -0.24 )
Sperm Concentration Decreased	2	5.75 ( 1.16 - 28.5 )	5.75 ( 5.89 )	4.56 ( 1.2 )	2.19 ( 0.27 )
Varicocele	2	8.63 ( 1.58 - 47.11 )	8.63 ( 8.99 )	6.08 ( 1.47 )	2.61 ( 0.61 )
Fracture	2	1.33 ( 0.31 - 5.59 )	1.33 ( 0.15 )	1.3 ( 0.39 )	0.38 ( -1.37 )
Status Epilepticus	2	0.5 ( 0.12 - 2.04 )	0.5 ( 0.97 )	0.51 ( 0.16 )	-0.96 ( -2.66 )
Weight Gain Poor	2	11.5 ( 1.92 - 68.85 )	11.5 ( 11.51 )	7.3 ( 1.63 )	2.87 ( 0.83 )
Failure To Thrive	2	0.86 ( 0.21 - 3.57 )	0.86 ( 0.04 )	0.87 ( 0.26 )	-0.2 ( -1.93 )
Haemorrhoids	2	0.49 ( 0.12 - 2.01 )	0.49 ( 1.01 )	0.51 ( 0.16 )	-0.98 ( -2.68 )
Hepatic Fibrosis	2	0.75 ( 0.18 - 3.09 )	0.75 ( 0.16 )	0.76 ( 0.23 )	-0.39 ( -2.11 )
Encephalitis Autoimmune	2	1.64 ( 0.39 - 7.01 )	1.64 ( 0.46 )	1.59 ( 0.47 )	0.67 ( -1.1 )
Respiratory Depression	2	1.08 ( 0.26 - 4.5 )	1.08 ( 0.01 )	1.07 ( 0.32 )	0.1 ( -1.63 )
Immunosuppression	2	0.37 ( 0.09 - 1.49 )	0.37 ( 2.14 )	0.38 ( 0.12 )	-1.39 ( -3.09 )
Hypothalamo-Pituitary Disorder	2	2.16 ( 0.5 - 9.38 )	2.16 ( 1.1 )	2.03 ( 0.59 )	1.02 ( -0.77 )
Toxic Erythema Of Chemotherapy	2	5.75 ( 1.16 - 28.5 )	5.75 ( 5.89 )	4.56 ( 1.2 )	2.19 ( 0.27 )
Adenocarcinoma	2	1.82 ( 0.42 - 7.8 )	1.82 ( 0.66 )	1.74 ( 0.51 )	0.8 ( -0.98 )
Blood Bilirubin Abnormal	2	6.9 ( 1.34 - 35.58 )	6.9 ( 7.21 )	5.21 ( 1.32 )	2.38 ( 0.43 )
Gastrointestinal Candidiasis	2	5.75 ( 1.16 - 28.5 )	5.75 ( 5.89 )	4.56 ( 1.2 )	2.19 ( 0.27 )
Clostridium Colitis	2	1.82 ( 0.42 - 7.8 )	1.82 ( 0.66 )	1.74 ( 0.51 )	0.8 ( -0.98 )
Skin Disorder	2	0.52 ( 0.13 - 2.13 )	0.52 ( 0.85 )	0.54 ( 0.17 )	-0.9 ( -2.6 )
Acute Pulmonary Oedema	2	0.51 ( 0.12 - 2.07 )	0.51 ( 0.93 )	0.52 ( 0.16 )	-0.94 ( -2.64 )
Activated Partial Thromboplastin Time Prolonged	2	0.72 ( 0.17 - 2.96 )	0.72 ( 0.21 )	0.73 ( 0.22 )	-0.45 ( -2.17 )
Liver Transplant	2	0.61 ( 0.15 - 2.48 )	0.61 ( 0.5 )	0.62 ( 0.19 )	-0.69 ( -2.4 )
Hemiparesis	2	0.66 ( 0.16 - 2.72 )	0.66 ( 0.33 )	0.68 ( 0.21 )	-0.56 ( -2.28 )
Blood Glucose Increased	2	0.26 ( 0.06 - 1.03 )	0.26 ( 4.28 )	0.27 ( 0.08 )	-1.91 ( -3.59 )
Hypovolaemia	2	1.05 ( 0.25 - 4.36 )	1.05 ( 0 )	1.04 ( 0.32 )	0.06 ( -1.67 )
Granulomatous Liver Disease	2	4.93 ( 1.02 - 23.73 )	4.93 ( 4.87 )	4.06 ( 1.09 )	2.02 ( 0.12 )
Red Blood Cell Abnormality	2	1.82 ( 0.42 - 7.8 )	1.82 ( 0.66 )	1.74 ( 0.51 )	0.8 ( -0.98 )
Blood Stem Cell Transplant Failure	2	0.36 ( 0.09 - 1.44 )	0.36 ( 2.29 )	0.37 ( 0.11 )	-1.44 ( -3.13 )
Blood Potassium Decreased	2	0.66 ( 0.16 - 2.72 )	0.66 ( 0.33 )	0.68 ( 0.21 )	-0.56 ( -2.28 )
Pulmonary Congestion	2	0.77 ( 0.19 - 3.16 )	0.77 ( 0.14 )	0.78 ( 0.24 )	-0.36 ( -2.08 )
Gallbladder Enlargement	2	6.9 ( 1.34 - 35.58 )	6.9 ( 7.21 )	5.21 ( 1.32 )	2.38 ( 0.43 )
Hypopnoea	2	17.25 ( 2.43 - 122.51 )	17.25 ( 15.31 )	9.13 ( 1.77 )	3.19 ( 1.08 )
Pharyngeal Oedema	2	2.65 ( 0.6 - 11.76 )	2.65 ( 1.79 )	2.43 ( 0.7 )	1.28 ( -0.53 )
Post Procedural Complication	2	0.24 ( 0.06 - 0.99 )	0.24 ( 4.6 )	0.26 ( 0.08 )	-1.97 ( -3.65 )
Mitral Valve Incompetence	2	0.68 ( 0.16 - 2.78 )	0.68 ( 0.3 )	0.69 ( 0.21 )	-0.54 ( -2.25 )
Complications Of Transplant Surgery	2	0.43 ( 0.11 - 1.75 )	0.43 ( 1.46 )	0.45 ( 0.14 )	-1.17 ( -2.86 )
Leukaemic Infiltration Pulmonary	2	11.5 ( 1.92 - 68.85 )	11.5 ( 11.51 )	7.3 ( 1.63 )	2.87 ( 0.83 )
Uterine Disorder	2	17.25 ( 2.43 - 122.51 )	17.25 ( 15.31 )	9.13 ( 1.77 )	3.19 ( 1.08 )
Tenderness	1	1.73 ( 0.22 - 13.48 )	1.73 ( 0.28 )	1.66 ( 0.3 )	0.73 ( -1.47 )
Central Nervous System Haemorrhage	1	2.88 ( 0.35 - 23.89 )	2.88 ( 1.05 )	2.61 ( 0.44 )	1.38 ( -0.9 )
Pericarditis Uraemic	1	Inf ( NaN - Inf )	Inf ( 17.25 )	18.25 ( 0 )	4.19 ( 1.3 )
Central Venous Catheterisation	1	5.75 ( 0.6 - 55.3 )	5.75 ( 2.94 )	4.56 ( 0.69 )	2.19 ( -0.22 )
Vulvovaginal Injury	1	Inf ( NaN - Inf )	Inf ( 17.25 )	18.25 ( 0 )	4.19 ( 1.3 )
Hepatitis Fulminant	1	0.45 ( 0.06 - 3.31 )	0.45 ( 0.64 )	0.47 ( 0.09 )	-1.1 ( -3.19 )
Incorrect Drug Administration Rate	1	5.75 ( 0.6 - 55.3 )	5.75 ( 2.94 )	4.56 ( 0.69 )	2.19 ( -0.22 )
T-Lymphocyte Count Decreased	1	1.57 ( 0.2 - 12.15 )	1.57 ( 0.19 )	1.52 ( 0.27 )	0.61 ( -1.59 )
Plasma Cell Myeloma Recurrent	1	0.91 ( 0.12 - 6.78 )	0.91 ( 0.01 )	0.91 ( 0.17 )	-0.13 ( -2.27 )
Ophthalmic Herpes Zoster	1	1.92 ( 0.24 - 15.13 )	1.92 ( 0.39 )	1.83 ( 0.32 )	0.87 ( -1.35 )
Vulval Haemorrhage	1	17.25 ( 1.08 - 275.87 )	17.25 ( 7.66 )	9.13 ( 0.9 )	3.19 ( 0.56 )
Jaundice Cholestatic	1	1.08 ( 0.14 - 8.13 )	1.08 ( 0.01 )	1.07 ( 0.2 )	0.1 ( -2.05 )
Malocclusion	1	3.45 ( 0.4 - 29.54 )	3.45 ( 1.45 )	3.04 ( 0.5 )	1.61 ( -0.71 )
Mastication Disorder	1	17.25 ( 1.08 - 275.87 )	17.25 ( 7.66 )	9.13 ( 0.9 )	3.19 ( 0.56 )
Speech Disorder	1	0.29 ( 0.04 - 2.11 )	0.29 ( 1.68 )	0.3 ( 0.06 )	-1.72 ( -3.79 )
Tooth Impacted	1	8.63 ( 0.78 - 95.15 )	8.63 ( 4.49 )	6.08 ( 0.82 )	2.61 ( 0.11 )
Hiatus Hernia	1	1.08 ( 0.14 - 8.13 )	1.08 ( 0.01 )	1.07 ( 0.2 )	0.1 ( -2.05 )
Ileal Perforation	1	3.45 ( 0.4 - 29.54 )	3.45 ( 1.45 )	3.04 ( 0.5 )	1.61 ( -0.71 )
Skin Infection	1	0.4 ( 0.06 - 2.91 )	0.4 ( 0.87 )	0.41 ( 0.08 )	-1.27 ( -3.35 )
Tremor	1	0.04 ( 0.01 - 0.29 )	0.04 ( 22.32 )	0.04 ( 0.01 )	-4.52 ( -6.57 )
Cholecystitis Infective	1	1.92 ( 0.24 - 15.13 )	1.92 ( 0.39 )	1.83 ( 0.32 )	0.87 ( -1.35 )
Body Height Below Normal	1	2.88 ( 0.35 - 23.89 )	2.88 ( 1.05 )	2.61 ( 0.44 )	1.38 ( -0.9 )
Glaucoma	1	1.08 ( 0.14 - 8.13 )	1.08 ( 0.01 )	1.07 ( 0.2 )	0.1 ( -2.05 )
Precocious Puberty	1	8.63 ( 0.78 - 95.15 )	8.63 ( 4.49 )	6.08 ( 0.82 )	2.61 ( 0.11 )
Genital Herpes	1	2.16 ( 0.27 - 17.24 )	2.16 ( 0.55 )	2.03 ( 0.36 )	1.02 ( -1.22 )
Urinary Tract Infection Enterococcal	1	0.48 ( 0.07 - 3.5 )	0.48 ( 0.55 )	0.49 ( 0.09 )	-1.02 ( -3.11 )
Strongyloidiasis	1	0.31 ( 0.04 - 2.23 )	0.31 ( 1.53 )	0.32 ( 0.06 )	-1.64 ( -3.72 )
Vertigo Positional	1	4.31 ( 0.48 - 38.6 )	4.31 ( 2.04 )	3.65 ( 0.58 )	1.87 ( -0.49 )
Haemolytic Uraemic Syndrome	1	0.19 ( 0.03 - 1.38 )	0.19 ( 3.37 )	0.2 ( 0.04 )	-2.32 ( -4.38 )
Renal Oncocytoma	1	17.25 ( 1.08 - 275.87 )	17.25 ( 7.66 )	9.13 ( 0.9 )	3.19 ( 0.56 )
Ear Infection	1	0.58 ( 0.08 - 4.22 )	0.58 ( 0.3 )	0.59 ( 0.11 )	-0.76 ( -2.87 )
Gastroenteritis Escherichia Coli	1	1.33 ( 0.17 - 10.15 )	1.33 ( 0.07 )	1.3 ( 0.24 )	0.38 ( -1.79 )
Pneumothorax Traumatic	1	Inf ( NaN - Inf )	Inf ( 17.25 )	18.25 ( 0 )	4.19 ( 1.3 )
Skin Toxicity	1	0.21 ( 0.03 - 1.53 )	0.21 ( 2.87 )	0.22 ( 0.04 )	-2.17 ( -4.23 )
Mucosal Toxicity	1	1.44 ( 0.19 - 11.06 )	1.44 ( 0.12 )	1.4 ( 0.25 )	0.49 ( -1.69 )
Acarodermatitis	1	2.16 ( 0.27 - 17.24 )	2.16 ( 0.55 )	2.03 ( 0.36 )	1.02 ( -1.22 )
Campylobacter Gastroenteritis	1	2.88 ( 0.35 - 23.89 )	2.88 ( 1.05 )	2.61 ( 0.44 )	1.38 ( -0.9 )
Infected Bite	1	Inf ( NaN - Inf )	Inf ( 17.25 )	18.25 ( 0 )	4.19 ( 1.3 )
Tetany	1	3.45 ( 0.4 - 29.54 )	3.45 ( 1.45 )	3.04 ( 0.5 )	1.61 ( -0.71 )
Palmar-Plantar Erythrodysaesthesia Syndrome	1	0.26 ( 0.04 - 1.88 )	0.26 ( 2.06 )	0.27 ( 0.05 )	-1.88 ( -3.95 )
Electrocardiogram Abnormal	1	1.92 ( 0.24 - 15.13 )	1.92 ( 0.39 )	1.83 ( 0.32 )	0.87 ( -1.35 )
Hypokalaemic Syndrome	1	Inf ( NaN - Inf )	Inf ( 17.25 )	18.25 ( 0 )	4.19 ( 1.3 )
Viral Test Positive	1	1.92 ( 0.24 - 15.13 )	1.92 ( 0.39 )	1.83 ( 0.32 )	0.87 ( -1.35 )
Cystitis Interstitial	1	17.25 ( 1.08 - 275.87 )	17.25 ( 7.66 )	9.13 ( 0.9 )	3.19 ( 0.56 )
Osteonecrosis	1	0.11 ( 0.02 - 0.81 )	0.11 ( 6.94 )	0.12 ( 0.02 )	-3.08 ( -5.13 )
Neurodegenerative Disorder	1	Inf ( NaN - Inf )	Inf ( 17.25 )	18.25 ( 0 )	4.19 ( 1.3 )
Rash Papular	1	0.39 ( 0.05 - 2.85 )	0.39 ( 0.92 )	0.41 ( 0.08 )	-1.3 ( -3.39 )
Rash Vesicular	1	1.73 ( 0.22 - 13.48 )	1.73 ( 0.28 )	1.66 ( 0.3 )	0.73 ( -1.47 )
Extravasation	1	3.45 ( 0.4 - 29.54 )	3.45 ( 1.45 )	3.04 ( 0.5 )	1.61 ( -0.71 )
Acute Myocardial Infarction	1	0.37 ( 0.05 - 2.66 )	0.37 ( 1.07 )	0.38 ( 0.07 )	-1.39 ( -3.48 )
Gastrointestinal Injury	1	1.92 ( 0.24 - 15.13 )	1.92 ( 0.39 )	1.83 ( 0.32 )	0.87 ( -1.35 )
Vulvovaginal Erythema	1	17.25 ( 1.08 - 275.87 )	17.25 ( 7.66 )	9.13 ( 0.9 )	3.19 ( 0.56 )
Aphthous Ulcer	1	0.82 ( 0.11 - 6.11 )	0.82 ( 0.04 )	0.83 ( 0.15 )	-0.27 ( -2.4 )
Acne	1	0.07 ( 0.01 - 0.53 )	0.07 ( 11.54 )	0.08 ( 0.02 )	-3.68 ( -5.73 )
Anxiety	1	0.13 ( 0.02 - 0.91 )	0.13 ( 5.91 )	0.13 ( 0.03 )	-2.9 ( -4.95 )
Dermatitis Acneiform	1	2.46 ( 0.3 - 20.04 )	2.46 ( 0.76 )	2.28 ( 0.4 )	1.19 ( -1.07 )
Toxoplasma Serology Positive	1	5.75 ( 0.6 - 55.3 )	5.75 ( 2.94 )	4.56 ( 0.69 )	2.19 ( -0.22 )
Vitamin D Deficiency	1	2.16 ( 0.27 - 17.24 )	2.16 ( 0.55 )	2.03 ( 0.36 )	1.02 ( -1.22 )
Wrist Fracture	1	2.46 ( 0.3 - 20.04 )	2.46 ( 0.76 )	2.28 ( 0.4 )	1.19 ( -1.07 )
Hand-Foot-Genital Syndrome	1	Inf ( NaN - Inf )	Inf ( 17.25 )	18.25 ( 0 )	4.19 ( 1.3 )
Corneal Leukoma	1	Inf ( NaN - Inf )	Inf ( 17.25 )	18.25 ( 0 )	4.19 ( 1.3 )
Corneal Scar	1	5.75 ( 0.6 - 55.3 )	5.75 ( 2.94 )	4.56 ( 0.69 )	2.19 ( -0.22 )
Injury	1	0.59 ( 0.08 - 4.37 )	0.59 ( 0.27 )	0.61 ( 0.11 )	-0.72 ( -2.82 )
Lymphoedema	1	0.62 ( 0.08 - 4.53 )	0.62 ( 0.23 )	0.63 ( 0.12 )	-0.67 ( -2.78 )
Auditory Disorder	1	17.25 ( 1.08 - 275.87 )	17.25 ( 7.66 )	9.13 ( 0.9 )	3.19 ( 0.56 )
Electroencephalogram Abnormal	1	0.58 ( 0.08 - 4.22 )	0.58 ( 0.3 )	0.59 ( 0.11 )	-0.76 ( -2.87 )
Venous Haemorrhage	1	1.92 ( 0.24 - 15.13 )	1.92 ( 0.39 )	1.83 ( 0.32 )	0.87 ( -1.35 )
Hepatic Pain	1	1.73 ( 0.22 - 13.48 )	1.73 ( 0.28 )	1.66 ( 0.3 )	0.73 ( -1.47 )
Vulvovaginal Candidiasis	1	2.88 ( 0.35 - 23.89 )	2.88 ( 1.05 )	2.61 ( 0.44 )	1.38 ( -0.9 )
Vulvovaginal Pruritus	1	1.73 ( 0.22 - 13.48 )	1.73 ( 0.28 )	1.66 ( 0.3 )	0.73 ( -1.47 )
Culture Stool Positive	1	1.44 ( 0.19 - 11.06 )	1.44 ( 0.12 )	1.4 ( 0.25 )	0.49 ( -1.69 )
Palmar Erythema	1	1.92 ( 0.24 - 15.13 )	1.92 ( 0.39 )	1.83 ( 0.32 )	0.87 ( -1.35 )
Subcutaneous Emphysema	1	0.91 ( 0.12 - 6.78 )	0.91 ( 0.01 )	0.91 ( 0.17 )	-0.13 ( -2.27 )
Pulmonary Mass	1	0.16 ( 0.02 - 1.15 )	0.16 ( 4.33 )	0.17 ( 0.03 )	-2.56 ( -4.62 )
Pulmonary Vein Occlusion	1	Inf ( NaN - Inf )	Inf ( 17.25 )	18.25 ( 0 )	4.19 ( 1.3 )
Haemophilus Infection	1	0.66 ( 0.09 - 4.89 )	0.66 ( 0.16 )	0.68 ( 0.13 )	-0.56 ( -2.68 )
Meningitis Pneumococcal	1	3.45 ( 0.4 - 29.54 )	3.45 ( 1.45 )	3.04 ( 0.5 )	1.61 ( -0.71 )
Infective Uveitis	1	Inf ( NaN - Inf )	Inf ( 17.25 )	18.25 ( 0 )	4.19 ( 1.3 )
Type 2 Diabetes Mellitus	1	0.56 ( 0.08 - 4.08 )	0.56 ( 0.34 )	0.57 ( 0.11 )	-0.81 ( -2.91 )
Faeces Discoloured	1	1.08 ( 0.14 - 8.13 )	1.08 ( 0.01 )	1.07 ( 0.2 )	0.1 ( -2.05 )
Faeces Soft	1	0.78 ( 0.11 - 5.82 )	0.78 ( 0.06 )	0.79 ( 0.15 )	-0.33 ( -2.46 )
Decreased Activity	1	1.92 ( 0.24 - 15.13 )	1.92 ( 0.39 )	1.83 ( 0.32 )	0.87 ( -1.35 )
Oxygen Consumption Decreased	1	3.45 ( 0.4 - 29.54 )	3.45 ( 1.45 )	3.04 ( 0.5 )	1.61 ( -0.71 )
B-Cell Lymphoma	1	0.27 ( 0.04 - 1.94 )	0.27 ( 1.95 )	0.28 ( 0.05 )	-1.83 ( -3.9 )
Megacolon	1	8.63 ( 0.78 - 95.15 )	8.63 ( 4.49 )	6.08 ( 0.82 )	2.61 ( 0.11 )
Post Procedural Sepsis	1	5.75 ( 0.6 - 55.3 )	5.75 ( 2.94 )	4.56 ( 0.69 )	2.19 ( -0.22 )
Bone Abscess	1	17.25 ( 1.08 - 275.87 )	17.25 ( 7.66 )	9.13 ( 0.9 )	3.19 ( 0.56 )
Drug Clearance Increased	1	17.25 ( 1.08 - 275.87 )	17.25 ( 7.66 )	9.13 ( 0.9 )	3.19 ( 0.56 )
Streptococcus Test Positive	1	2.16 ( 0.27 - 17.24 )	2.16 ( 0.55 )	2.03 ( 0.36 )	1.02 ( -1.22 )
Adenoviral Conjunctivitis	1	17.25 ( 1.08 - 275.87 )	17.25 ( 7.66 )	9.13 ( 0.9 )	3.19 ( 0.56 )
Spirochaetal Infection	1	8.63 ( 0.78 - 95.15 )	8.63 ( 4.49 )	6.08 ( 0.82 )	2.61 ( 0.11 )
Genital Labial Adhesions	1	17.25 ( 1.08 - 275.87 )	17.25 ( 7.66 )	9.13 ( 0.9 )	3.19 ( 0.56 )
Haematocolpos	1	17.25 ( 1.08 - 275.87 )	17.25 ( 7.66 )	9.13 ( 0.9 )	3.19 ( 0.56 )
Hypogonadism Female	1	1.92 ( 0.24 - 15.13 )	1.92 ( 0.39 )	1.83 ( 0.32 )	0.87 ( -1.35 )
Type 1 Diabetes Mellitus	1	0.72 ( 0.1 - 5.31 )	0.72 ( 0.11 )	0.73 ( 0.14 )	-0.45 ( -2.57 )
Electrocardiogram T Wave Amplitude Decreased	1	2.88 ( 0.35 - 23.89 )	2.88 ( 1.05 )	2.61 ( 0.44 )	1.38 ( -0.9 )
Electrocardiogram T Wave Biphasic	1	3.45 ( 0.4 - 29.54 )	3.45 ( 1.45 )	3.04 ( 0.5 )	1.61 ( -0.71 )
Torsade De Pointes	1	1.44 ( 0.19 - 11.06 )	1.44 ( 0.12 )	1.4 ( 0.25 )	0.49 ( -1.69 )
Invasive Ductal Breast Carcinoma	1	4.31 ( 0.48 - 38.6 )	4.31 ( 2.04 )	3.65 ( 0.58 )	1.87 ( -0.49 )
Cutaneous T-Cell Lymphoma	1	4.31 ( 0.48 - 38.6 )	4.31 ( 2.04 )	3.65 ( 0.58 )	1.87 ( -0.49 )
Atelectasis	1	0.2 ( 0.03 - 1.42 )	0.2 ( 3.21 )	0.21 ( 0.04 )	-2.27 ( -4.33 )
Pelvic Fluid Collection	1	2.16 ( 0.27 - 17.24 )	2.16 ( 0.55 )	2.03 ( 0.36 )	1.02 ( -1.22 )
Hyperkinesia	1	8.63 ( 0.78 - 95.15 )	8.63 ( 4.49 )	6.08 ( 0.82 )	2.61 ( 0.11 )
Mycobacterium Abscessus Infection	1	0.69 ( 0.09 - 5.09 )	0.69 ( 0.13 )	0.7 ( 0.13 )	-0.51 ( -2.63 )
Ventricular Dysfunction	1	0.47 ( 0.06 - 3.4 )	0.47 ( 0.59 )	0.48 ( 0.09 )	-1.06 ( -3.15 )
Ovarian Sertoli-Leydig Cell Tumour	1	Inf ( NaN - Inf )	Inf ( 17.25 )	18.25 ( 0 )	4.19 ( 1.3 )
Viral Hepatitis Carrier	1	Inf ( NaN - Inf )	Inf ( 17.25 )	18.25 ( 0 )	4.19 ( 1.3 )
Lacrimation Decreased	1	Inf ( NaN - Inf )	Inf ( 17.25 )	18.25 ( 0 )	4.19 ( 1.3 )
Vital Capacity Decreased	1	4.31 ( 0.48 - 38.6 )	4.31 ( 2.04 )	3.65 ( 0.58 )	1.87 ( -0.49 )
Chromaturia	1	0.78 ( 0.11 - 5.82 )	0.78 ( 0.06 )	0.79 ( 0.15 )	-0.33 ( -2.46 )
Hypertrichosis	1	2.16 ( 0.27 - 17.24 )	2.16 ( 0.55 )	2.03 ( 0.36 )	1.02 ( -1.22 )
Photosensitivity Reaction	1	0.2 ( 0.03 - 1.42 )	0.2 ( 3.21 )	0.21 ( 0.04 )	-2.27 ( -4.33 )
Skin Ulcer	1	0.31 ( 0.04 - 2.23 )	0.31 ( 1.53 )	0.32 ( 0.06 )	-1.64 ( -3.72 )
Hypovitaminosis	1	5.75 ( 0.6 - 55.3 )	5.75 ( 2.94 )	4.56 ( 0.69 )	2.19 ( -0.22 )
Drug Level Increased	1	0.05 ( 0.01 - 0.37 )	0.05 ( 17.27 )	0.05 ( 0.01 )	-4.19 ( -6.24 )
Small Cell Lung Cancer Limited Stage	1	Inf ( NaN - Inf )	Inf ( 17.25 )	18.25 ( 0 )	4.19 ( 1.3 )
Arterial Injury	1	4.31 ( 0.48 - 38.6 )	4.31 ( 2.04 )	3.65 ( 0.58 )	1.87 ( -0.49 )
Complications Of Transplanted Lung	1	0.49 ( 0.07 - 3.6 )	0.49 ( 0.51 )	0.51 ( 0.1 )	-0.98 ( -3.07 )
Cerebral Disorder	1	1.33 ( 0.17 - 10.15 )	1.33 ( 0.07 )	1.3 ( 0.24 )	0.38 ( -1.79 )
Hemiplegia	1	0.49 ( 0.07 - 3.6 )	0.49 ( 0.51 )	0.51 ( 0.1 )	-0.98 ( -3.07 )
Intracranial Tumour Haemorrhage	1	2.46 ( 0.3 - 20.04 )	2.46 ( 0.76 )	2.28 ( 0.4 )	1.19 ( -1.07 )
Meningeal Neoplasm	1	2.88 ( 0.35 - 23.89 )	2.88 ( 1.05 )	2.61 ( 0.44 )	1.38 ( -0.9 )
Paraproteinaemia	1	8.63 ( 0.78 - 95.15 )	8.63 ( 4.49 )	6.08 ( 0.82 )	2.61 ( 0.11 )
Serous Retinal Detachment	1	Inf ( NaN - Inf )	Inf ( 17.25 )	18.25 ( 0 )	4.19 ( 1.3 )
Visual Acuity Reduced	1	0.24 ( 0.03 - 1.72 )	0.24 ( 2.38 )	0.25 ( 0.05 )	-2 ( -4.07 )
Antiphospholipid Antibodies	1	Inf ( NaN - Inf )	Inf ( 17.25 )	18.25 ( 0 )	4.19 ( 1.3 )
Communication Disorder	1	2.16 ( 0.27 - 17.24 )	2.16 ( 0.55 )	2.03 ( 0.36 )	1.02 ( -1.22 )
Arrhythmia Supraventricular	1	2.88 ( 0.35 - 23.89 )	2.88 ( 1.05 )	2.61 ( 0.44 )	1.38 ( -0.9 )
Cortical Dysplasia	1	Inf ( NaN - Inf )	Inf ( 17.25 )	18.25 ( 0 )	4.19 ( 1.3 )
Muscle Contractions Involuntary	1	2.46 ( 0.3 - 20.04 )	2.46 ( 0.76 )	2.28 ( 0.4 )	1.19 ( -1.07 )
Myoclonic Epilepsy	1	4.31 ( 0.48 - 38.6 )	4.31 ( 2.04 )	3.65 ( 0.58 )	1.87 ( -0.49 )
Fungal Rhinitis	1	8.63 ( 0.78 - 95.15 )	8.63 ( 4.49 )	6.08 ( 0.82 )	2.61 ( 0.11 )
Colon Neoplasm	1	8.63 ( 0.78 - 95.15 )	8.63 ( 4.49 )	6.08 ( 0.82 )	2.61 ( 0.11 )
Premature Delivery	1	0.29 ( 0.04 - 2.11 )	0.29 ( 1.68 )	0.3 ( 0.06 )	-1.72 ( -3.79 )
Twin Pregnancy	1	Inf ( NaN - Inf )	Inf ( 17.25 )	18.25 ( 0 )	4.19 ( 1.3 )
Unintended Pregnancy	1	Inf ( NaN - Inf )	Inf ( 17.25 )	18.25 ( 0 )	4.19 ( 1.3 )
Trichuriasis	1	Inf ( NaN - Inf )	Inf ( 17.25 )	18.25 ( 0 )	4.19 ( 1.3 )
Menopause	1	Inf ( NaN - Inf )	Inf ( 17.25 )	18.25 ( 0 )	4.19 ( 1.3 )
Pharyngeal Lesion	1	Inf ( NaN - Inf )	Inf ( 17.25 )	18.25 ( 0 )	4.19 ( 1.3 )
Tracheal Stenosis	1	8.63 ( 0.78 - 95.15 )	8.63 ( 4.49 )	6.08 ( 0.82 )	2.61 ( 0.11 )
Bronchopulmonary Aspergillosis Allergic	1	17.25 ( 1.08 - 275.87 )	17.25 ( 7.66 )	9.13 ( 0.9 )	3.19 ( 0.56 )
Pulmonary Air Leakage	1	2.46 ( 0.3 - 20.04 )	2.46 ( 0.76 )	2.28 ( 0.4 )	1.19 ( -1.07 )
Acanthamoeba Infection	1	0.91 ( 0.12 - 6.78 )	0.91 ( 0.01 )	0.91 ( 0.17 )	-0.13 ( -2.27 )
Parasitic Encephalitis	1	8.63 ( 0.78 - 95.15 )	8.63 ( 4.49 )	6.08 ( 0.82 )	2.61 ( 0.11 )
Central Nervous System Infection	1	0.72 ( 0.1 - 5.31 )	0.72 ( 0.11 )	0.73 ( 0.14 )	-0.45 ( -2.57 )
Sinus Bradycardia	1	0.69 ( 0.09 - 5.09 )	0.69 ( 0.13 )	0.7 ( 0.13 )	-0.51 ( -2.63 )
Abscess	1	0.29 ( 0.04 - 2.07 )	0.29 ( 1.74 )	0.3 ( 0.06 )	-1.74 ( -3.81 )
Inflammatory Bowel Disease	1	0.58 ( 0.08 - 4.22 )	0.58 ( 0.3 )	0.59 ( 0.11 )	-0.76 ( -2.87 )
Bacillus Bacteraemia	1	17.25 ( 1.08 - 275.87 )	17.25 ( 7.66 )	9.13 ( 0.9 )	3.19 ( 0.56 )
Bacterial Colitis	1	2.88 ( 0.35 - 23.89 )	2.88 ( 1.05 )	2.61 ( 0.44 )	1.38 ( -0.9 )
Nodule	1	0.78 ( 0.11 - 5.82 )	0.78 ( 0.06 )	0.79 ( 0.15 )	-0.33 ( -2.46 )
Opportunistic Infection	1	0.51 ( 0.07 - 3.71 )	0.51 ( 0.46 )	0.52 ( 0.1 )	-0.94 ( -3.04 )
Allogenic Stem Cell Transplantation	1	1.92 ( 0.24 - 15.13 )	1.92 ( 0.39 )	1.83 ( 0.32 )	0.87 ( -1.35 )
Pulmonary Nocardiosis	1	0.58 ( 0.08 - 4.22 )	0.58 ( 0.3 )	0.59 ( 0.11 )	-0.76 ( -2.87 )
Papillary Thyroid Cancer	1	3.45 ( 0.4 - 29.54 )	3.45 ( 1.45 )	3.04 ( 0.5 )	1.61 ( -0.71 )
Intracranial Infection	1	1.57 ( 0.2 - 12.15 )	1.57 ( 0.19 )	1.52 ( 0.27 )	0.61 ( -1.59 )
Intracranial Mass	1	2.16 ( 0.27 - 17.24 )	2.16 ( 0.55 )	2.03 ( 0.36 )	1.02 ( -1.22 )
Cytomegalovirus Gastrointestinal Infection	1	0.42 ( 0.06 - 3.06 )	0.42 ( 0.78 )	0.43 ( 0.08 )	-1.2 ( -3.29 )
Mucosal Haemorrhage	1	1.15 ( 0.15 - 8.71 )	1.15 ( 0.02 )	1.14 ( 0.21 )	0.19 ( -1.97 )
Autonomic Neuropathy	1	17.25 ( 1.08 - 275.87 )	17.25 ( 7.66 )	9.13 ( 0.9 )	3.19 ( 0.56 )
Eosinophilic Pneumonia Acute	1	8.63 ( 0.78 - 95.15 )	8.63 ( 4.49 )	6.08 ( 0.82 )	2.61 ( 0.11 )
Actinomycosis	1	1.23 ( 0.16 - 9.37 )	1.23 ( 0.04 )	1.22 ( 0.22 )	0.28 ( -1.88 )
Palatal Ulcer	1	3.45 ( 0.4 - 29.54 )	3.45 ( 1.45 )	3.04 ( 0.5 )	1.61 ( -0.71 )
Protein Total Decreased	1	0.51 ( 0.07 - 3.71 )	0.51 ( 0.46 )	0.52 ( 0.1 )	-0.94 ( -3.04 )
Oesophageal Haemorrhage	1	5.75 ( 0.6 - 55.3 )	5.75 ( 2.94 )	4.56 ( 0.69 )	2.19 ( -0.22 )
Blood Chloride Increased	1	0.69 ( 0.09 - 5.09 )	0.69 ( 0.13 )	0.7 ( 0.13 )	-0.51 ( -2.63 )
Blood Potassium Increased	1	0.17 ( 0.02 - 1.25 )	0.17 ( 3.88 )	0.18 ( 0.04 )	-2.45 ( -4.51 )
Blood Sodium Increased	1	1.15 ( 0.15 - 8.71 )	1.15 ( 0.02 )	1.14 ( 0.21 )	0.19 ( -1.97 )
Dyspnoea Exertional	1	0.19 ( 0.03 - 1.33 )	0.19 ( 3.54 )	0.19 ( 0.04 )	-2.36 ( -4.43 )
Tricuspid Valve Incompetence	1	0.78 ( 0.11 - 5.82 )	0.78 ( 0.06 )	0.79 ( 0.15 )	-0.33 ( -2.46 )
Enamel Anomaly	1	4.31 ( 0.48 - 38.6 )	4.31 ( 2.04 )	3.65 ( 0.58 )	1.87 ( -0.49 )
Tooth Disorder	1	0.91 ( 0.12 - 6.78 )	0.91 ( 0.01 )	0.91 ( 0.17 )	-0.13 ( -2.27 )
Legionella Infection	1	0.96 ( 0.13 - 7.18 )	0.96 ( 0 )	0.96 ( 0.18 )	-0.06 ( -2.2 )
Haemorrhagic Stroke	1	0.72 ( 0.1 - 5.31 )	0.72 ( 0.11 )	0.73 ( 0.14 )	-0.45 ( -2.57 )
Adenoviral Encephalitis	1	Inf ( NaN - Inf )	Inf ( 17.25 )	18.25 ( 0 )	4.19 ( 1.3 )
Herpes Simplex Encephalitis	1	2.46 ( 0.3 - 20.04 )	2.46 ( 0.76 )	2.28 ( 0.4 )	1.19 ( -1.07 )
Eosinophilic Pneumonia	1	2.46 ( 0.3 - 20.04 )	2.46 ( 0.76 )	2.28 ( 0.4 )	1.19 ( -1.07 )
Pulmonary Pneumatocele	1	5.75 ( 0.6 - 55.3 )	5.75 ( 2.94 )	4.56 ( 0.69 )	2.19 ( -0.22 )
Accidental Death	1	17.25 ( 1.08 - 275.87 )	17.25 ( 7.66 )	9.13 ( 0.9 )	3.19 ( 0.56 )
Lymphatic Disorder	1	1.92 ( 0.24 - 15.13 )	1.92 ( 0.39 )	1.83 ( 0.32 )	0.87 ( -1.35 )
Tuberculous Pleurisy	1	8.63 ( 0.78 - 95.15 )	8.63 ( 4.49 )	6.08 ( 0.82 )	2.61 ( 0.11 )
Eosinophil Count Increased	1	1.44 ( 0.19 - 11.06 )	1.44 ( 0.12 )	1.4 ( 0.25 )	0.49 ( -1.69 )
Corynebacterium Bacteraemia	1	4.31 ( 0.48 - 38.6 )	4.31 ( 2.04 )	3.65 ( 0.58 )	1.87 ( -0.49 )
Hodgkin'S Disease	1	0.52 ( 0.07 - 3.82 )	0.52 ( 0.42 )	0.54 ( 0.1 )	-0.9 ( -3 )
Abdominal Discomfort	1	0.15 ( 0.02 - 1.08 )	0.15 ( 4.72 )	0.16 ( 0.03 )	-2.66 ( -4.71 )
Dermatitis Contact	1	2.46 ( 0.3 - 20.04 )	2.46 ( 0.76 )	2.28 ( 0.4 )	1.19 ( -1.07 )
Cerebellar Calcification	1	Inf ( NaN - Inf )	Inf ( 17.25 )	18.25 ( 0 )	4.19 ( 1.3 )
Osteosarcoma	1	1.57 ( 0.2 - 12.15 )	1.57 ( 0.19 )	1.52 ( 0.27 )	0.61 ( -1.59 )
Rhinocerebral Mucormycosis	1	2.88 ( 0.35 - 23.89 )	2.88 ( 1.05 )	2.61 ( 0.44 )	1.38 ( -0.9 )
Frequent Bowel Movements	1	0.96 ( 0.13 - 7.18 )	0.96 ( 0 )	0.96 ( 0.18 )	-0.06 ( -2.2 )
Polyneuropathy Chronic	1	Inf ( NaN - Inf )	Inf ( 17.25 )	18.25 ( 0 )	4.19 ( 1.3 )
Enterobacter Pneumonia	1	2.46 ( 0.3 - 20.04 )	2.46 ( 0.76 )	2.28 ( 0.4 )	1.19 ( -1.07 )
Lymphocytosis	1	1.08 ( 0.14 - 8.13 )	1.08 ( 0.01 )	1.07 ( 0.2 )	0.1 ( -2.05 )
Myopathy	1	0.23 ( 0.03 - 1.63 )	0.23 ( 2.6 )	0.24 ( 0.05 )	-2.08 ( -4.14 )
Central Nervous System Vasculitis	1	1.44 ( 0.19 - 11.06 )	1.44 ( 0.12 )	1.4 ( 0.25 )	0.49 ( -1.69 )
Hepatorenal Failure	1	5.75 ( 0.6 - 55.3 )	5.75 ( 2.94 )	4.56 ( 0.69 )	2.19 ( -0.22 )
Bladder Cancer	1	0.91 ( 0.12 - 6.78 )	0.91 ( 0.01 )	0.91 ( 0.17 )	-0.13 ( -2.27 )
Enterococcal Gastroenteritis	1	Inf ( NaN - Inf )	Inf ( 17.25 )	18.25 ( 0 )	4.19 ( 1.3 )
Polyarthritis	1	1.57 ( 0.2 - 12.15 )	1.57 ( 0.19 )	1.52 ( 0.27 )	0.61 ( -1.59 )
Hepatitis C Rna Increased	1	4.31 ( 0.48 - 38.6 )	4.31 ( 2.04 )	3.65 ( 0.58 )	1.87 ( -0.49 )
Hand Fracture	1	3.45 ( 0.4 - 29.54 )	3.45 ( 1.45 )	3.04 ( 0.5 )	1.61 ( -0.71 )
Pancreatitis Necrotising	1	0.69 ( 0.09 - 5.09 )	0.69 ( 0.13 )	0.7 ( 0.13 )	-0.51 ( -2.63 )
Acquired Macroglossia	1	2.16 ( 0.27 - 17.24 )	2.16 ( 0.55 )	2.03 ( 0.36 )	1.02 ( -1.22 )
Gastritis Fungal	1	1.44 ( 0.19 - 11.06 )	1.44 ( 0.12 )	1.4 ( 0.25 )	0.49 ( -1.69 )
Fat Necrosis	1	1.44 ( 0.19 - 11.06 )	1.44 ( 0.12 )	1.4 ( 0.25 )	0.49 ( -1.69 )
Septic Embolus	1	0.54 ( 0.07 - 3.95 )	0.54 ( 0.38 )	0.55 ( 0.1 )	-0.85 ( -2.95 )
Splenic Vein Thrombosis	1	1.33 ( 0.17 - 10.15 )	1.33 ( 0.07 )	1.3 ( 0.24 )	0.38 ( -1.79 )
Hypoxic-Ischaemic Encephalopathy	1	0.96 ( 0.13 - 7.18 )	0.96 ( 0 )	0.96 ( 0.18 )	-0.06 ( -2.2 )
Ischaemic Stroke	1	0.34 ( 0.05 - 2.45 )	0.34 ( 1.27 )	0.35 ( 0.07 )	-1.51 ( -3.59 )
Gastrointestinal Necrosis	1	0.48 ( 0.07 - 3.5 )	0.48 ( 0.55 )	0.49 ( 0.09 )	-1.02 ( -3.11 )
Cerebral Artery Thrombosis	1	1.73 ( 0.22 - 13.48 )	1.73 ( 0.28 )	1.66 ( 0.3 )	0.73 ( -1.47 )
Arteritis Infective	1	1.57 ( 0.2 - 12.15 )	1.57 ( 0.19 )	1.52 ( 0.27 )	0.61 ( -1.59 )
Pulmonary Infarction	1	1.23 ( 0.16 - 9.37 )	1.23 ( 0.04 )	1.22 ( 0.22 )	0.28 ( -1.88 )
Muscle Spasms	1	0.15 ( 0.02 - 1.09 )	0.15 ( 4.66 )	0.16 ( 0.03 )	-2.64 ( -4.7 )
Mucosal Ulceration	1	1.08 ( 0.14 - 8.13 )	1.08 ( 0.01 )	1.07 ( 0.2 )	0.1 ( -2.05 )
Pyloric Stenosis	1	Inf ( NaN - Inf )	Inf ( 17.25 )	18.25 ( 0 )	4.19 ( 1.3 )
Nasal Cavity Packing	1	Inf ( NaN - Inf )	Inf ( 17.25 )	18.25 ( 0 )	4.19 ( 1.3 )
Myelofibrosis	1	1.01 ( 0.14 - 7.63 )	1.01 ( 0 )	1.01 ( 0.19 )	0.02 ( -2.13 )
Biliary Tract Infection Bacterial	1	8.63 ( 0.78 - 95.15 )	8.63 ( 4.49 )	6.08 ( 0.82 )	2.61 ( 0.11 )
Infective Exacerbation Of Bronchiectasis	1	5.75 ( 0.6 - 55.3 )	5.75 ( 2.94 )	4.56 ( 0.69 )	2.19 ( -0.22 )
Ewing-Like Sarcoma	1	Inf ( NaN - Inf )	Inf ( 17.25 )	18.25 ( 0 )	4.19 ( 1.3 )
Metastases To Lung	1	0.25 ( 0.04 - 1.83 )	0.25 ( 2.16 )	0.26 ( 0.05 )	-1.92 ( -3.99 )
5'Nucleotidase Increased	1	2.16 ( 0.27 - 17.24 )	2.16 ( 0.55 )	2.03 ( 0.36 )	1.02 ( -1.22 )
Anti-Platelet Antibody Positive	1	1.73 ( 0.22 - 13.48 )	1.73 ( 0.28 )	1.66 ( 0.3 )	0.73 ( -1.47 )
Blood Bilirubin Unconjugated Increased	1	1.08 ( 0.14 - 8.13 )	1.08 ( 0.01 )	1.07 ( 0.2 )	0.1 ( -2.05 )
Coombs Direct Test Positive	1	1.01 ( 0.14 - 7.63 )	1.01 ( 0 )	1.01 ( 0.19 )	0.02 ( -2.13 )
Embolism Venous	1	1.73 ( 0.22 - 13.48 )	1.73 ( 0.28 )	1.66 ( 0.3 )	0.73 ( -1.47 )
Urine Analysis Abnormal	1	1.08 ( 0.14 - 8.13 )	1.08 ( 0.01 )	1.07 ( 0.2 )	0.1 ( -2.05 )
Withdrawal Syndrome	1	0.69 ( 0.09 - 5.09 )	0.69 ( 0.13 )	0.7 ( 0.13 )	-0.51 ( -2.63 )
Peripheral T-Cell Lymphoma Unspecified	1	1.73 ( 0.22 - 13.48 )	1.73 ( 0.28 )	1.66 ( 0.3 )	0.73 ( -1.47 )
Bowen'S Disease	1	0.62 ( 0.08 - 4.53 )	0.62 ( 0.23 )	0.63 ( 0.12 )	-0.67 ( -2.78 )
Device Related Sepsis	1	0.62 ( 0.08 - 4.53 )	0.62 ( 0.23 )	0.63 ( 0.12 )	-0.67 ( -2.78 )
Dysmetria	1	4.31 ( 0.48 - 38.6 )	4.31 ( 2.04 )	3.65 ( 0.58 )	1.87 ( -0.49 )
Early Satiety	1	5.75 ( 0.6 - 55.3 )	5.75 ( 2.94 )	4.56 ( 0.69 )	2.19 ( -0.22 )
Tooth Abscess	1	2.16 ( 0.27 - 17.24 )	2.16 ( 0.55 )	2.03 ( 0.36 )	1.02 ( -1.22 )
Malignant Melanoma	1	0.25 ( 0.03 - 1.77 )	0.25 ( 2.27 )	0.26 ( 0.05 )	-1.96 ( -4.03 )
Cardiorenal Syndrome	1	1.01 ( 0.14 - 7.63 )	1.01 ( 0 )	1.01 ( 0.19 )	0.02 ( -2.13 )
Investigation	1	5.75 ( 0.6 - 55.3 )	5.75 ( 2.94 )	4.56 ( 0.69 )	2.19 ( -0.22 )
Product Preparation Error	1	5.75 ( 0.6 - 55.3 )	5.75 ( 2.94 )	4.56 ( 0.69 )	2.19 ( -0.22 )
Acute Lung Injury	1	1.73 ( 0.22 - 13.48 )	1.73 ( 0.28 )	1.66 ( 0.3 )	0.73 ( -1.47 )
Prostate Cancer	1	0.4 ( 0.06 - 2.91 )	0.4 ( 0.87 )	0.41 ( 0.08 )	-1.27 ( -3.35 )
Squamous Cell Carcinoma Of Skin	1	0.08 ( 0.01 - 0.58 )	0.08 ( 10.39 )	0.09 ( 0.02 )	-3.55 ( -5.6 )
Penile Squamous Cell Carcinoma	1	17.25 ( 1.08 - 275.87 )	17.25 ( 7.66 )	9.13 ( 0.9 )	3.19 ( 0.56 )
Central Nervous System Lesion	1	0.4 ( 0.06 - 2.91 )	0.4 ( 0.87 )	0.41 ( 0.08 )	-1.27 ( -3.35 )
Systemic Infection	1	2.88 ( 0.35 - 23.89 )	2.88 ( 1.05 )	2.61 ( 0.44 )	1.38 ( -0.9 )
Electrocardiogram T Wave Inversion	1	4.31 ( 0.48 - 38.6 )	4.31 ( 2.04 )	3.65 ( 0.58 )	1.87 ( -0.49 )
Dry Skin	1	0.29 ( 0.04 - 2.11 )	0.29 ( 1.68 )	0.3 ( 0.06 )	-1.72 ( -3.79 )
Salivary Gland Cancer	1	8.63 ( 0.78 - 95.15 )	8.63 ( 4.49 )	6.08 ( 0.82 )	2.61 ( 0.11 )
Vitreous Haemorrhage	1	3.45 ( 0.4 - 29.54 )	3.45 ( 1.45 )	3.04 ( 0.5 )	1.61 ( -0.71 )
Injection Site Reaction	1	3.45 ( 0.4 - 29.54 )	3.45 ( 1.45 )	3.04 ( 0.5 )	1.61 ( -0.71 )
Epstein-Barr Virus Associated Lymphoma	1	0.39 ( 0.05 - 2.85 )	0.39 ( 0.92 )	0.41 ( 0.08 )	-1.3 ( -3.39 )
Right Ventricular Systolic Pressure Increased	1	17.25 ( 1.08 - 275.87 )	17.25 ( 7.66 )	9.13 ( 0.9 )	3.19 ( 0.56 )
Eosinophilia	1	0.38 ( 0.05 - 2.78 )	0.38 ( 0.97 )	0.4 ( 0.08 )	-1.33 ( -3.42 )
Cerebrovascular Accident	1	0.12 ( 0.02 - 0.84 )	0.12 ( 6.54 )	0.12 ( 0.02 )	-3.01 ( -5.06 )
Disseminated Cryptococcosis	1	0.44 ( 0.06 - 3.22 )	0.44 ( 0.69 )	0.46 ( 0.09 )	-1.13 ( -3.22 )
Genital Ulceration	1	2.88 ( 0.35 - 23.89 )	2.88 ( 1.05 )	2.61 ( 0.44 )	1.38 ( -0.9 )
Genitourinary Symptom	1	17.25 ( 1.08 - 275.87 )	17.25 ( 7.66 )	9.13 ( 0.9 )	3.19 ( 0.56 )
Polycythaemia	1	1.01 ( 0.14 - 7.63 )	1.01 ( 0 )	1.01 ( 0.19 )	0.02 ( -2.13 )
Epiglottitis	1	Inf ( NaN - Inf )	Inf ( 17.25 )	18.25 ( 0 )	4.19 ( 1.3 )
Clavicle Fracture	1	5.75 ( 0.6 - 55.3 )	5.75 ( 2.94 )	4.56 ( 0.69 )	2.19 ( -0.22 )
Femur Fracture	1	0.75 ( 0.1 - 5.55 )	0.75 ( 0.08 )	0.76 ( 0.14 )	-0.39 ( -2.52 )
Fibula Fracture	1	Inf ( NaN - Inf )	Inf ( 17.25 )	18.25 ( 0 )	4.19 ( 1.3 )
Foot Fracture	1	1.33 ( 0.17 - 10.15 )	1.33 ( 0.07 )	1.3 ( 0.24 )	0.38 ( -1.79 )
Humerus Fracture	1	3.45 ( 0.4 - 29.54 )	3.45 ( 1.45 )	3.04 ( 0.5 )	1.61 ( -0.71 )
Pathological Fracture	1	2.46 ( 0.3 - 20.04 )	2.46 ( 0.76 )	2.28 ( 0.4 )	1.19 ( -1.07 )
Tibia Fracture	1	5.75 ( 0.6 - 55.3 )	5.75 ( 2.94 )	4.56 ( 0.69 )	2.19 ( -0.22 )
Gastrooesophageal Reflux Disease	1	0.19 ( 0.03 - 1.33 )	0.19 ( 3.54 )	0.19 ( 0.04 )	-2.36 ( -4.43 )
Wound Infection Staphylococcal	1	1.15 ( 0.15 - 8.71 )	1.15 ( 0.02 )	1.14 ( 0.21 )	0.19 ( -1.97 )
Bacillus Infection	1	1.15 ( 0.15 - 8.71 )	1.15 ( 0.02 )	1.14 ( 0.21 )	0.19 ( -1.97 )
Haematocrit Decreased	1	0.12 ( 0.02 - 0.83 )	0.12 ( 6.71 )	0.12 ( 0.02 )	-3.04 ( -5.09 )
Blood Fibrinogen Increased	1	5.75 ( 0.6 - 55.3 )	5.75 ( 2.94 )	4.56 ( 0.69 )	2.19 ( -0.22 )
Bronchopulmonary Disease	1	Inf ( NaN - Inf )	Inf ( 17.25 )	18.25 ( 0 )	4.19 ( 1.3 )
Carotid Artery Aneurysm	1	5.75 ( 0.6 - 55.3 )	5.75 ( 2.94 )	4.56 ( 0.69 )	2.19 ( -0.22 )
Prothrombin Time Prolonged	1	0.58 ( 0.08 - 4.22 )	0.58 ( 0.3 )	0.59 ( 0.11 )	-0.76 ( -2.87 )
Hypophagia	1	0.33 ( 0.05 - 2.35 )	0.33 ( 1.37 )	0.34 ( 0.06 )	-1.56 ( -3.64 )
Respiratory Moniliasis	1	4.31 ( 0.48 - 38.6 )	4.31 ( 2.04 )	3.65 ( 0.58 )	1.87 ( -0.49 )
Lung Neoplasm	1	0.56 ( 0.08 - 4.08 )	0.56 ( 0.34 )	0.57 ( 0.11 )	-0.81 ( -2.91 )
Paresis	1	1.73 ( 0.22 - 13.48 )	1.73 ( 0.28 )	1.66 ( 0.3 )	0.73 ( -1.47 )
Therapeutic Product Effect Incomplete	1	0.24 ( 0.03 - 1.75 )	0.24 ( 2.33 )	0.25 ( 0.05 )	-1.98 ( -4.05 )
Epidermal Necrosis	1	3.45 ( 0.4 - 29.54 )	3.45 ( 1.45 )	3.04 ( 0.5 )	1.61 ( -0.71 )
Rash Erythematous	1	0.27 ( 0.04 - 1.97 )	0.27 ( 1.9 )	0.29 ( 0.05 )	-1.81 ( -3.88 )
Cranial Nerve Disorder	1	1.92 ( 0.24 - 15.13 )	1.92 ( 0.39 )	1.83 ( 0.32 )	0.87 ( -1.35 )
Infective Thrombosis	1	17.25 ( 1.08 - 275.87 )	17.25 ( 7.66 )	9.13 ( 0.9 )	3.19 ( 0.56 )
Urinary Bladder Haemorrhage	1	1.44 ( 0.19 - 11.06 )	1.44 ( 0.12 )	1.4 ( 0.25 )	0.49 ( -1.69 )
Chylothorax	1	3.45 ( 0.4 - 29.54 )	3.45 ( 1.45 )	3.04 ( 0.5 )	1.61 ( -0.71 )
Visual Impairment	1	0.11 ( 0.02 - 0.81 )	0.11 ( 6.94 )	0.12 ( 0.02 )	-3.08 ( -5.13 )
Haemorrhoidal Haemorrhage	1	2.88 ( 0.35 - 23.89 )	2.88 ( 1.05 )	2.61 ( 0.44 )	1.38 ( -0.9 )
Postrenal Failure	1	1.44 ( 0.19 - 11.06 )	1.44 ( 0.12 )	1.4 ( 0.25 )	0.49 ( -1.69 )
Transitional Cell Carcinoma	1	0.51 ( 0.07 - 3.71 )	0.51 ( 0.46 )	0.52 ( 0.1 )	-0.94 ( -3.04 )
Anti-Thyroid Antibody	1	17.25 ( 1.08 - 275.87 )	17.25 ( 7.66 )	9.13 ( 0.9 )	3.19 ( 0.56 )
Primary Hypothyroidism	1	17.25 ( 1.08 - 275.87 )	17.25 ( 7.66 )	9.13 ( 0.9 )	3.19 ( 0.56 )
Thyroid Mass	1	17.25 ( 1.08 - 275.87 )	17.25 ( 7.66 )	9.13 ( 0.9 )	3.19 ( 0.56 )
Face Oedema	1	0.37 ( 0.05 - 2.72 )	0.38 ( 1.02 )	0.39 ( 0.07 )	-1.36 ( -3.45 )
Acute Lymphocytic Leukaemia Refractory	1	17.25 ( 1.08 - 275.87 )	17.25 ( 7.66 )	9.13 ( 0.9 )	3.19 ( 0.56 )
Bone Marrow Disorder	1	0.59 ( 0.08 - 4.37 )	0.59 ( 0.27 )	0.61 ( 0.11 )	-0.72 ( -2.82 )
Emphysematous Cystitis	1	3.45 ( 0.4 - 29.54 )	3.45 ( 1.45 )	3.04 ( 0.5 )	1.61 ( -0.71 )
Synovitis	1	2.46 ( 0.3 - 20.04 )	2.46 ( 0.76 )	2.28 ( 0.4 )	1.19 ( -1.07 )
Mesenteric Panniculitis	1	Inf ( NaN - Inf )	Inf ( 17.25 )	18.25 ( 0 )	4.19 ( 1.3 )
Thrombophlebitis	1	1.73 ( 0.22 - 13.48 )	1.73 ( 0.28 )	1.66 ( 0.3 )	0.73 ( -1.47 )
Hyperphosphataemia	1	1.15 ( 0.15 - 8.71 )	1.15 ( 0.02 )	1.14 ( 0.21 )	0.19 ( -1.97 )
Visceral Venous Thrombosis	1	Inf ( NaN - Inf )	Inf ( 17.25 )	18.25 ( 0 )	4.19 ( 1.3 )
Cryptococcosis	1	0.33 ( 0.05 - 2.4 )	0.33 ( 1.32 )	0.34 ( 0.07 )	-1.54 ( -3.62 )
Encephalitis Fungal	1	1.44 ( 0.19 - 11.06 )	1.44 ( 0.12 )	1.4 ( 0.25 )	0.49 ( -1.69 )
Anogenital Warts	1	2.16 ( 0.27 - 17.24 )	2.16 ( 0.55 )	2.03 ( 0.36 )	1.02 ( -1.22 )
Necrosis	1	0.42 ( 0.06 - 3.06 )	0.42 ( 0.78 )	0.43 ( 0.08 )	-1.2 ( -3.29 )
Portal Fibrosis	1	3.45 ( 0.4 - 29.54 )	3.45 ( 1.45 )	3.04 ( 0.5 )	1.61 ( -0.71 )
Pulmonary Valve Incompetence	1	8.63 ( 0.78 - 95.15 )	8.63 ( 4.49 )	6.08 ( 0.82 )	2.61 ( 0.11 )
Central Nervous System Leukaemia	1	5.75 ( 0.6 - 55.3 )	5.75 ( 2.94 )	4.56 ( 0.69 )	2.19 ( -0.22 )
Cushing'S Syndrome	1	0.96 ( 0.13 - 7.18 )	0.96 ( 0 )	0.96 ( 0.18 )	-0.06 ( -2.2 )
Multiple-Drug Resistance	1	0.96 ( 0.13 - 7.18 )	0.96 ( 0 )	0.96 ( 0.18 )	-0.06 ( -2.2 )
Febrile Convulsion	1	4.31 ( 0.48 - 38.6 )	4.31 ( 2.04 )	3.65 ( 0.58 )	1.87 ( -0.49 )
Croup Infectious	1	17.25 ( 1.08 - 275.87 )	17.25 ( 7.66 )	9.13 ( 0.9 )	3.19 ( 0.56 )
Faeces Pale	1	5.75 ( 0.6 - 55.3 )	5.75 ( 2.94 )	4.56 ( 0.69 )	2.19 ( -0.22 )
Bowel Movement Irregularity	1	5.75 ( 0.6 - 55.3 )	5.75 ( 2.94 )	4.56 ( 0.69 )	2.19 ( -0.22 )
Splenic Abscess	1	1.92 ( 0.24 - 15.13 )	1.92 ( 0.39 )	1.83 ( 0.32 )	0.87 ( -1.35 )
Papilloma	1	1.23 ( 0.16 - 9.37 )	1.23 ( 0.04 )	1.22 ( 0.22 )	0.28 ( -1.88 )
Menopausal Symptoms	1	5.75 ( 0.6 - 55.3 )	5.75 ( 2.94 )	4.56 ( 0.69 )	2.19 ( -0.22 )
Appendicolith	1	5.75 ( 0.6 - 55.3 )	5.75 ( 2.94 )	4.56 ( 0.69 )	2.19 ( -0.22 )
Serum Sickness	1	0.22 ( 0.03 - 1.59 )	0.22 ( 2.71 )	0.23 ( 0.04 )	-2.11 ( -4.18 )
Appendiceal Abscess	1	4.31 ( 0.48 - 38.6 )	4.31 ( 2.04 )	3.65 ( 0.58 )	1.87 ( -0.49 )
Oesophageal Carcinoma Recurrent	1	Inf ( NaN - Inf )	Inf ( 17.25 )	18.25 ( 0 )	4.19 ( 1.3 )
Haemoglobinuria	1	2.46 ( 0.3 - 20.04 )	2.46 ( 0.76 )	2.28 ( 0.4 )	1.19 ( -1.07 )
Portal Venous Gas	1	Inf ( NaN - Inf )	Inf ( 17.25 )	18.25 ( 0 )	4.19 ( 1.3 )
Blood Pressure Systolic Decreased	1	0.96 ( 0.13 - 7.18 )	0.96 ( 0 )	0.96 ( 0.18 )	-0.06 ( -2.2 )
Waist Circumference Increased	1	Inf ( NaN - Inf )	Inf ( 17.25 )	18.25 ( 0 )	4.19 ( 1.3 )
Intestinal Ischaemia	1	0.45 ( 0.06 - 3.31 )	0.45 ( 0.64 )	0.47 ( 0.09 )	-1.1 ( -3.19 )
Primary Adrenal Insufficiency	1	8.63 ( 0.78 - 95.15 )	8.63 ( 4.49 )	6.08 ( 0.82 )	2.61 ( 0.11 )
Parainfluenzae Viral Bronchitis	1	3.45 ( 0.4 - 29.54 )	3.45 ( 1.45 )	3.04 ( 0.5 )	1.61 ( -0.71 )
Hepatic Cancer	1	1.57 ( 0.2 - 12.15 )	1.57 ( 0.19 )	1.52 ( 0.27 )	0.61 ( -1.59 )
Dermatomyositis	1	17.25 ( 1.08 - 275.87 )	17.25 ( 7.66 )	9.13 ( 0.9 )	3.19 ( 0.56 )
Brain Stem Infarction	1	5.75 ( 0.6 - 55.3 )	5.75 ( 2.94 )	4.56 ( 0.69 )	2.19 ( -0.22 )
Infective Aneurysm	1	2.16 ( 0.27 - 17.24 )	2.16 ( 0.55 )	2.03 ( 0.36 )	1.02 ( -1.22 )
Cellulitis Orbital	1	8.63 ( 0.78 - 95.15 )	8.63 ( 4.49 )	6.08 ( 0.82 )	2.61 ( 0.11 )
Optic Neuritis	1	1.44 ( 0.19 - 11.06 )	1.44 ( 0.12 )	1.4 ( 0.25 )	0.49 ( -1.69 )
Aneurysm Ruptured	1	17.25 ( 1.08 - 275.87 )	17.25 ( 7.66 )	9.13 ( 0.9 )	3.19 ( 0.56 )
Chloroma	1	1.44 ( 0.19 - 11.06 )	1.44 ( 0.12 )	1.4 ( 0.25 )	0.49 ( -1.69 )
Neurogenic Tumour	1	Inf ( NaN - Inf )	Inf ( 17.25 )	18.25 ( 0 )	4.19 ( 1.3 )
Trigeminal Nerve Disorder	1	5.75 ( 0.6 - 55.3 )	5.75 ( 2.94 )	4.56 ( 0.69 )	2.19 ( -0.22 )
Leukoencephalopathy	1	0.14 ( 0.02 - 1.03 )	0.14 ( 5.06 )	0.15 ( 0.03 )	-2.73 ( -4.79 )
Colon Cancer	1	0.51 ( 0.07 - 3.71 )	0.51 ( 0.46 )	0.52 ( 0.1 )	-0.94 ( -3.04 )
Therapy Non-Responder	1	0.07 ( 0.01 - 0.49 )	0.07 ( 12.7 )	0.07 ( 0.01 )	-3.8 ( -5.85 )
Nutritional Supplementation	1	Inf ( NaN - Inf )	Inf ( 17.25 )	18.25 ( 0 )	4.19 ( 1.3 )
Cytomegalovirus Syndrome	1	0.48 ( 0.07 - 3.5 )	0.48 ( 0.55 )	0.49 ( 0.09 )	-1.02 ( -3.11 )
Adrenal Insufficiency	1	0.3 ( 0.04 - 2.19 )	0.3 ( 1.58 )	0.31 ( 0.06 )	-1.67 ( -3.74 )
Hypoaesthesia	1	0.15 ( 0.02 - 1.06 )	0.15 ( 4.89 )	0.15 ( 0.03 )	-2.69 ( -4.75 )
Pneumomediastinum	1	0.37 ( 0.05 - 2.66 )	0.37 ( 1.07 )	0.38 ( 0.07 )	-1.39 ( -3.48 )
Cytomegalovirus Gastritis	1	0.45 ( 0.06 - 3.31 )	0.45 ( 0.64 )	0.47 ( 0.09 )	-1.1 ( -3.19 )
Respiratory Acidosis	1	1.08 ( 0.14 - 8.13 )	1.08 ( 0.01 )	1.07 ( 0.2 )	0.1 ( -2.05 )
Hepatosplenomegaly	1	0.25 ( 0.03 - 1.77 )	0.25 ( 2.27 )	0.26 ( 0.05 )	-1.96 ( -4.03 )
Renal Tubular Acidosis	1	0.39 ( 0.05 - 2.85 )	0.39 ( 0.92 )	0.41 ( 0.08 )	-1.3 ( -3.39 )
Device Related Thrombosis	1	4.31 ( 0.48 - 38.6 )	4.31 ( 2.04 )	3.65 ( 0.58 )	1.87 ( -0.49 )
Oesophageal Ulcer	1	0.69 ( 0.09 - 5.09 )	0.69 ( 0.13 )	0.7 ( 0.13 )	-0.51 ( -2.63 )
Oesophageal Stenosis	1	0.64 ( 0.09 - 4.7 )	0.64 ( 0.2 )	0.65 ( 0.12 )	-0.62 ( -2.73 )
Oesophageal Mucosal Tear	1	Inf ( NaN - Inf )	Inf ( 17.25 )	18.25 ( 0 )	4.19 ( 1.3 )
Mycobacterium Avium Complex Infection	1	0.37 ( 0.05 - 2.66 )	0.37 ( 1.07 )	0.38 ( 0.07 )	-1.39 ( -3.48 )
Pulmonary Function Test Abnormal	1	1.57 ( 0.2 - 12.15 )	1.57 ( 0.19 )	1.52 ( 0.27 )	0.61 ( -1.59 )
Cerebrospinal Fluid Leakage	1	Inf ( NaN - Inf )	Inf ( 17.25 )	18.25 ( 0 )	4.19 ( 1.3 )
Encephalocele	1	8.63 ( 0.78 - 95.15 )	8.63 ( 4.49 )	6.08 ( 0.82 )	2.61 ( 0.11 )
Immune-Mediated Cytopenia	1	5.75 ( 0.6 - 55.3 )	5.75 ( 2.94 )	4.56 ( 0.69 )	2.19 ( -0.22 )
Oliguria	1	0.17 ( 0.02 - 1.22 )	0.17 ( 3.99 )	0.18 ( 0.03 )	-2.48 ( -4.54 )
Pneumonia Acinetobacter	1	2.46 ( 0.3 - 20.04 )	2.46 ( 0.76 )	2.28 ( 0.4 )	1.19 ( -1.07 )
Alveolar Lung Disease	1	Inf ( NaN - Inf )	Inf ( 17.25 )	18.25 ( 0 )	4.19 ( 1.3 )
Haemorrhage Subcutaneous	1	1.73 ( 0.22 - 13.48 )	1.73 ( 0.28 )	1.66 ( 0.3 )	0.73 ( -1.47 )
Hypopyon	1	17.25 ( 1.08 - 275.87 )	17.25 ( 7.66 )	9.13 ( 0.9 )	3.19 ( 0.56 )
Angioimmunoblastic T-Cell Lymphoma Recurrent	1	Inf ( NaN - Inf )	Inf ( 17.25 )	18.25 ( 0 )	4.19 ( 1.3 )
Metabolic Encephalopathy	1	0.69 ( 0.09 - 5.09 )	0.69 ( 0.13 )	0.7 ( 0.13 )	-0.51 ( -2.63 )
Immune-Mediated Lung Disease	1	Inf ( NaN - Inf )	Inf ( 17.25 )	18.25 ( 0 )	4.19 ( 1.3 )
Leuconostoc Infection	1	17.25 ( 1.08 - 275.87 )	17.25 ( 7.66 )	9.13 ( 0.9 )	3.19 ( 0.56 )
Histoplasmosis	1	0.82 ( 0.11 - 6.11 )	0.82 ( 0.04 )	0.83 ( 0.15 )	-0.27 ( -2.4 )
Hippocampal Sclerosis	1	2.16 ( 0.27 - 17.24 )	2.16 ( 0.55 )	2.03 ( 0.36 )	1.02 ( -1.22 )
Central Hypothyroidism	1	3.45 ( 0.4 - 29.54 )	3.45 ( 1.45 )	3.04 ( 0.5 )	1.61 ( -0.71 )
Blood Beta-D-Glucan Increased	1	1.44 ( 0.19 - 11.06 )	1.44 ( 0.12 )	1.4 ( 0.25 )	0.49 ( -1.69 )
Abscess Fungal	1	3.45 ( 0.4 - 29.54 )	3.45 ( 1.45 )	3.04 ( 0.5 )	1.61 ( -0.71 )
Parvovirus Infection	1	0.72 ( 0.1 - 5.31 )	0.72 ( 0.11 )	0.73 ( 0.14 )	-0.45 ( -2.57 )
Nutritional Condition Abnormal	1	17.25 ( 1.08 - 275.87 )	17.25 ( 7.66 )	9.13 ( 0.9 )	3.19 ( 0.56 )
Gastroenteritis Clostridial	1	1.57 ( 0.2 - 12.15 )	1.57 ( 0.19 )	1.52 ( 0.27 )	0.61 ( -1.59 )
Device Related Bacteraemia	1	4.31 ( 0.48 - 38.6 )	4.31 ( 2.04 )	3.65 ( 0.58 )	1.87 ( -0.49 )
Hepatitis E	1	0.22 ( 0.03 - 1.55 )	0.22 ( 2.82 )	0.23 ( 0.04 )	-2.15 ( -4.22 )
Varicella Virus Test Positive	1	2.46 ( 0.3 - 20.04 )	2.46 ( 0.76 )	2.28 ( 0.4 )	1.19 ( -1.07 )
Superinfection	1	0.44 ( 0.06 - 3.22 )	0.44 ( 0.69 )	0.46 ( 0.09 )	-1.13 ( -3.22 )
Ventricular Tachycardia	1	0.34 ( 0.05 - 2.5 )	0.35 ( 1.22 )	0.36 ( 0.07 )	-1.48 ( -3.56 )
Pericarditis Fungal	1	1.57 ( 0.2 - 12.15 )	1.57 ( 0.19 )	1.52 ( 0.27 )	0.61 ( -1.59 )
Cardiac Hypertrophy	1	2.16 ( 0.27 - 17.24 )	2.16 ( 0.55 )	2.03 ( 0.36 )	1.02 ( -1.22 )
Ventricular Hypokinesia	1	0.69 ( 0.09 - 5.09 )	0.69 ( 0.13 )	0.7 ( 0.13 )	-0.51 ( -2.63 )
Treatment Noncompliance	1	0.19 ( 0.03 - 1.36 )	0.19 ( 3.43 )	0.2 ( 0.04 )	-2.33 ( -4.4 )
Bladder Transitional Cell Carcinoma	1	1.73 ( 0.22 - 13.48 )	1.73 ( 0.28 )	1.66 ( 0.3 )	0.73 ( -1.47 )
Dysarthria	1	0.25 ( 0.03 - 1.8 )	0.25 ( 2.22 )	0.26 ( 0.05 )	-1.94 ( -4.01 )
Pulmonary Artery Thrombosis	1	2.16 ( 0.27 - 17.24 )	2.16 ( 0.55 )	2.03 ( 0.36 )	1.02 ( -1.22 )
Hyperhomocysteinaemia	1	8.63 ( 0.78 - 95.15 )	8.63 ( 4.49 )	6.08 ( 0.82 )	2.61 ( 0.11 )
Mesenteric Artery Thrombosis	1	17.25 ( 1.08 - 275.87 )	17.25 ( 7.66 )	9.13 ( 0.9 )	3.19 ( 0.56 )
Blood Folate Decreased	1	17.25 ( 1.08 - 275.87 )	17.25 ( 7.66 )	9.13 ( 0.9 )	3.19 ( 0.56 )
Truncus Coeliacus Thrombosis	1	Inf ( NaN - Inf )	Inf ( 17.25 )	18.25 ( 0 )	4.19 ( 1.3 )
Aortic Thrombosis	1	4.31 ( 0.48 - 38.6 )	4.31 ( 2.04 )	3.65 ( 0.58 )	1.87 ( -0.49 )
Photophobia	1	0.54 ( 0.07 - 3.95 )	0.54 ( 0.38 )	0.55 ( 0.1 )	-0.85 ( -2.95 )
Exercise Tolerance Decreased	1	4.31 ( 0.48 - 38.6 )	4.31 ( 2.04 )	3.65 ( 0.58 )	1.87 ( -0.49 )
Drug Level Below Therapeutic	1	0.48 ( 0.07 - 3.5 )	0.48 ( 0.55 )	0.49 ( 0.09 )	-1.02 ( -3.11 )
Expired Product Administered	1	1.57 ( 0.2 - 12.15 )	1.57 ( 0.19 )	1.52 ( 0.27 )	0.61 ( -1.59 )
Product Dispensing Error	1	1.08 ( 0.14 - 8.13 )	1.08 ( 0.01 )	1.07 ( 0.2 )	0.1 ( -2.05 )
Meningitis Bacterial	1	1.23 ( 0.16 - 9.37 )	1.23 ( 0.04 )	1.22 ( 0.22 )	0.28 ( -1.88 )
Parvovirus B19 Infection Reactivation	1	17.25 ( 1.08 - 275.87 )	17.25 ( 7.66 )	9.13 ( 0.9 )	3.19 ( 0.56 )
Reticulocytopenia	1	1.15 ( 0.15 - 8.71 )	1.15 ( 0.02 )	1.14 ( 0.21 )	0.19 ( -1.97 )
Pfapa Syndrome	1	17.25 ( 1.08 - 275.87 )	17.25 ( 7.66 )	9.13 ( 0.9 )	3.19 ( 0.56 )
Visceral Leishmaniasis	1	1.44 ( 0.19 - 11.06 )	1.44 ( 0.12 )	1.4 ( 0.25 )	0.49 ( -1.69 )
Intestinal Perforation	1	0.37 ( 0.05 - 2.66 )	0.37 ( 1.07 )	0.38 ( 0.07 )	-1.39 ( -3.48 )
Serum Ferritin Increased	1	0.34 ( 0.05 - 2.45 )	0.34 ( 1.27 )	0.35 ( 0.07 )	-1.51 ( -3.59 )
Prerenal Failure	1	1.73 ( 0.22 - 13.48 )	1.73 ( 0.28 )	1.66 ( 0.3 )	0.73 ( -1.47 )
Immune Recovery Uveitis	1	17.25 ( 1.08 - 275.87 )	17.25 ( 7.66 )	9.13 ( 0.9 )	3.19 ( 0.56 )
Adult T-Cell Lymphoma/Leukaemia Recurrent	1	1.92 ( 0.24 - 15.13 )	1.92 ( 0.39 )	1.83 ( 0.32 )	0.87 ( -1.35 )
Delayed Haematopoietic Reconstitution	1	Inf ( NaN - Inf )	Inf ( 17.25 )	18.25 ( 0 )	4.19 ( 1.3 )
Pharyngeal Inflammation	1	0.91 ( 0.12 - 6.78 )	0.91 ( 0.01 )	0.91 ( 0.17 )	-0.13 ( -2.27 )
Haematological Malignancy	1	0.62 ( 0.08 - 4.53 )	0.62 ( 0.23 )	0.63 ( 0.12 )	-0.67 ( -2.78 )
Genital Haemorrhage	1	3.45 ( 0.4 - 29.54 )	3.45 ( 1.45 )	3.04 ( 0.5 )	1.61 ( -0.71 )
Glomerulonephritis Minimal Lesion	1	0.64 ( 0.09 - 4.7 )	0.64 ( 0.2 )	0.65 ( 0.12 )	-0.62 ( -2.73 )
Tonsillitis	1	0.48 ( 0.07 - 3.5 )	0.48 ( 0.55 )	0.49 ( 0.09 )	-1.02 ( -3.11 )
Intentional Product Misuse	1	0.28 ( 0.04 - 2.04 )	0.28 ( 1.79 )	0.29 ( 0.06 )	-1.76 ( -3.84 )
Urticaria	1	0.2 ( 0.03 - 1.44 )	0.2 ( 3.15 )	0.21 ( 0.04 )	-2.25 ( -4.32 )
Type I Hypersensitivity	1	3.45 ( 0.4 - 29.54 )	3.45 ( 1.45 )	3.04 ( 0.5 )	1.61 ( -0.71 )
Blood Test Abnormal	1	1.73 ( 0.22 - 13.48 )	1.73 ( 0.28 )	1.66 ( 0.3 )	0.73 ( -1.47 )
Gastrostomy	1	Inf ( NaN - Inf )	Inf ( 17.25 )	18.25 ( 0 )	4.19 ( 1.3 )
Tracheostomy	1	2.16 ( 0.27 - 17.24 )	2.16 ( 0.55 )	2.03 ( 0.36 )	1.02 ( -1.22 )
Pneumonia Serratia	1	17.25 ( 1.08 - 275.87 )	17.25 ( 7.66 )	9.13 ( 0.9 )	3.19 ( 0.56 )
Septic Rash	1	Inf ( NaN - Inf )	Inf ( 17.25 )	18.25 ( 0 )	4.19 ( 1.3 )
Pneumococcal Infection	1	0.72 ( 0.1 - 5.31 )	0.72 ( 0.11 )	0.73 ( 0.14 )	-0.45 ( -2.57 )
Pneumonia Pneumococcal	1	0.69 ( 0.09 - 5.09 )	0.69 ( 0.13 )	0.7 ( 0.13 )	-0.51 ( -2.63 )
Dermatitis Atopic	1	2.46 ( 0.3 - 20.04 )	2.46 ( 0.76 )	2.28 ( 0.4 )	1.19 ( -1.07 )
Pneumocystis Jirovecii Infection	1	0.37 ( 0.05 - 2.66 )	0.37 ( 1.07 )	0.38 ( 0.07 )	-1.39 ( -3.48 )
Sudden Cardiac Death	1	2.16 ( 0.27 - 17.24 )	2.16 ( 0.55 )	2.03 ( 0.36 )	1.02 ( -1.22 )
Pulmonary Mucormycosis	1	0.45 ( 0.06 - 3.31 )	0.45 ( 0.64 )	0.47 ( 0.09 )	-1.1 ( -3.19 )
Lung Lobectomy	1	3.45 ( 0.4 - 29.54 )	3.45 ( 1.45 )	3.04 ( 0.5 )	1.61 ( -0.71 )
Endocrine Disorder	1	3.45 ( 0.4 - 29.54 )	3.45 ( 1.45 )	3.04 ( 0.5 )	1.61 ( -0.71 )
Symphysiolysis	1	Inf ( NaN - Inf )	Inf ( 17.25 )	18.25 ( 0 )	4.19 ( 1.3 )
Sporotrichosis	1	Inf ( NaN - Inf )	Inf ( 17.25 )	18.25 ( 0 )	4.19 ( 1.3 )
Anal Infection	1	1.57 ( 0.2 - 12.15 )	1.57 ( 0.19 )	1.52 ( 0.27 )	0.61 ( -1.59 )
Hepatosplenic Candidiasis	1	1.92 ( 0.24 - 15.13 )	1.92 ( 0.39 )	1.83 ( 0.32 )	0.87 ( -1.35 )
Pre-Engraftment Immune Reaction	1	0.34 ( 0.05 - 2.5 )	0.35 ( 1.22 )	0.36 ( 0.07 )	-1.48 ( -3.56 )
Hypophosphataemia	1	0.35 ( 0.05 - 2.55 )	0.35 ( 1.17 )	0.37 ( 0.07 )	-1.45 ( -3.53 )
Cholecystitis Acute	1	0.58 ( 0.08 - 4.22 )	0.58 ( 0.3 )	0.59 ( 0.11 )	-0.76 ( -2.87 )
Hepatopulmonary Syndrome	1	4.31 ( 0.48 - 38.6 )	4.31 ( 2.04 )	3.65 ( 0.58 )	1.87 ( -0.49 )
Oculogyric Crisis	1	Inf ( NaN - Inf )	Inf ( 17.25 )	18.25 ( 0 )	4.19 ( 1.3 )
Enterocolitis Fungal	1	17.25 ( 1.08 - 275.87 )	17.25 ( 7.66 )	9.13 ( 0.9 )	3.19 ( 0.56 )
Blood Bilirubin Decreased	1	2.46 ( 0.3 - 20.04 )	2.46 ( 0.76 )	2.28 ( 0.4 )	1.19 ( -1.07 )
Rhabdomyosarcoma	1	4.31 ( 0.48 - 38.6 )	4.31 ( 2.04 )	3.65 ( 0.58 )	1.87 ( -0.49 )
Calcineurin Inhibitor Induced Pain Syndrome	1	17.25 ( 1.08 - 275.87 )	17.25 ( 7.66 )	9.13 ( 0.9 )	3.19 ( 0.56 )
Bacterial Test Positive	1	1.08 ( 0.14 - 8.13 )	1.08 ( 0.01 )	1.07 ( 0.2 )	0.1 ( -2.05 )
Vanishing Bile Duct Syndrome	1	0.78 ( 0.11 - 5.82 )	0.78 ( 0.06 )	0.79 ( 0.15 )	-0.33 ( -2.46 )
Salmonella Bacteraemia	1	5.75 ( 0.6 - 55.3 )	5.75 ( 2.94 )	4.56 ( 0.69 )	2.19 ( -0.22 )
Product Prescribing Issue	1	1.23 ( 0.16 - 9.37 )	1.23 ( 0.04 )	1.22 ( 0.22 )	0.28 ( -1.88 )
Genital Herpes Simplex	1	4.31 ( 0.48 - 38.6 )	4.31 ( 2.04 )	3.65 ( 0.58 )	1.87 ( -0.49 )
Failed In Vitro Fertilisation	1	Inf ( NaN - Inf )	Inf ( 17.25 )	18.25 ( 0 )	4.19 ( 1.3 )
Platelet Engraftment Failure	1	Inf ( NaN - Inf )	Inf ( 17.25 )	18.25 ( 0 )	4.19 ( 1.3 )
Subacute Sclerosing Panencephalitis	1	5.75 ( 0.6 - 55.3 )	5.75 ( 2.94 )	4.56 ( 0.69 )	2.19 ( -0.22 )
Atrophy	1	1.08 ( 0.14 - 8.13 )	1.08 ( 0.01 )	1.07 ( 0.2 )	0.1 ( -2.05 )
Food Refusal	1	Inf ( NaN - Inf )	Inf ( 17.25 )	18.25 ( 0 )	4.19 ( 1.3 )
Measles	1	1.73 ( 0.22 - 13.48 )	1.73 ( 0.28 )	1.66 ( 0.3 )	0.73 ( -1.47 )
Transfusion-Related Acute Lung Injury	1	0.96 ( 0.13 - 7.18 )	0.96 ( 0 )	0.96 ( 0.18 )	-0.06 ( -2.2 )
Temperature Intolerance	1	1.92 ( 0.24 - 15.13 )	1.92 ( 0.39 )	1.83 ( 0.32 )	0.87 ( -1.35 )
Lethargy	1	0.18 ( 0.02 - 1.28 )	0.18 ( 3.76 )	0.19 ( 0.04 )	-2.42 ( -4.49 )
Cardiovascular Insufficiency	1	2.88 ( 0.35 - 23.89 )	2.88 ( 1.05 )	2.61 ( 0.44 )	1.38 ( -0.9 )
Diplegia	1	1.44 ( 0.19 - 11.06 )	1.44 ( 0.12 )	1.4 ( 0.25 )	0.49 ( -1.69 )
Dyskinesia	1	0.31 ( 0.04 - 2.23 )	0.31 ( 1.53 )	0.32 ( 0.06 )	-1.64 ( -3.72 )
Eye Movement Disorder	1	0.72 ( 0.1 - 5.31 )	0.72 ( 0.11 )	0.73 ( 0.14 )	-0.45 ( -2.57 )
Histiocytic Necrotising Lymphadenitis	1	Inf ( NaN - Inf )	Inf ( 17.25 )	18.25 ( 0 )	4.19 ( 1.3 )
Hypouricaemia	1	1.15 ( 0.15 - 8.71 )	1.15 ( 0.02 )	1.14 ( 0.21 )	0.19 ( -1.97 )
Acidosis Hyperchloraemic	1	1.15 ( 0.15 - 8.71 )	1.15 ( 0.02 )	1.14 ( 0.21 )	0.19 ( -1.97 )
Glycosuria	1	1.23 ( 0.16 - 9.37 )	1.23 ( 0.04 )	1.22 ( 0.22 )	0.28 ( -1.88 )
Idiopathic Intracranial Hypertension	1	3.45 ( 0.4 - 29.54 )	3.45 ( 1.45 )	3.04 ( 0.5 )	1.61 ( -0.71 )
Gastroenteritis Eosinophilic	1	1.73 ( 0.22 - 13.48 )	1.73 ( 0.28 )	1.66 ( 0.3 )	0.73 ( -1.47 )
Cerebral Atrophy	1	0.58 ( 0.08 - 4.22 )	0.58 ( 0.3 )	0.59 ( 0.11 )	-0.76 ( -2.87 )
Lumbar Vertebral Fracture	1	4.31 ( 0.48 - 38.6 )	4.31 ( 2.04 )	3.65 ( 0.58 )	1.87 ( -0.49 )
Haematological Infection	1	0.33 ( 0.05 - 2.35 )	0.33 ( 1.37 )	0.34 ( 0.06 )	-1.56 ( -3.64 )
Salmonellosis	1	1.57 ( 0.2 - 12.15 )	1.57 ( 0.19 )	1.52 ( 0.27 )	0.61 ( -1.59 )
Cardiovascular Disorder	1	0.38 ( 0.05 - 2.78 )	0.38 ( 0.97 )	0.4 ( 0.08 )	-1.33 ( -3.42 )
Asphyxia	1	1.92 ( 0.24 - 15.13 )	1.92 ( 0.39 )	1.83 ( 0.32 )	0.87 ( -1.35 )
Respiratory Tract Haemorrhage	1	1.33 ( 0.17 - 10.15 )	1.33 ( 0.07 )	1.3 ( 0.24 )	0.38 ( -1.79 )
Idiopathic Pulmonary Fibrosis	1	8.63 ( 0.78 - 95.15 )	8.63 ( 4.49 )	6.08 ( 0.82 )	2.61 ( 0.11 )
Passenger Lymphocyte Syndrome	1	1.44 ( 0.19 - 11.06 )	1.44 ( 0.12 )	1.4 ( 0.25 )	0.49 ( -1.69 )
Small Intestinal Perforation	1	1.33 ( 0.17 - 10.15 )	1.33 ( 0.07 )	1.3 ( 0.24 )	0.38 ( -1.79 )
Cytomegalovirus Enteritis	1	0.35 ( 0.05 - 2.55 )	0.35 ( 1.17 )	0.37 ( 0.07 )	-1.45 ( -3.53 )
Red Blood Cell Count Decreased	1	0.16 ( 0.02 - 1.14 )	0.16 ( 4.38 )	0.17 ( 0.03 )	-2.58 ( -4.64 )
Biopsy Lung Abnormal	1	8.63 ( 0.78 - 95.15 )	8.63 ( 4.49 )	6.08 ( 0.82 )	2.61 ( 0.11 )
Incorrect Dose Administered	1	0.15 ( 0.02 - 1.07 )	0.15 ( 4.78 )	0.16 ( 0.03 )	-2.67 ( -4.73 )
Overdose	1	0.07 ( 0.01 - 0.49 )	0.07 ( 12.58 )	0.07 ( 0.01 )	-3.79 ( -5.84 )
Complications Of Bone Marrow Transplant	1	0.16 ( 0.02 - 1.11 )	0.16 ( 4.55 )	0.16 ( 0.03 )	-2.62 ( -4.68 )
Sudden Death	1	0.54 ( 0.07 - 3.95 )	0.54 ( 0.38 )	0.55 ( 0.1 )	-0.85 ( -2.95 )
Vitamin C Deficiency	1	Inf ( NaN - Inf )	Inf ( 17.25 )	18.25 ( 0 )	4.19 ( 1.3 )
Blood Ph Decreased	1	3.45 ( 0.4 - 29.54 )	3.45 ( 1.45 )	3.04 ( 0.5 )	1.61 ( -0.71 )
Pco2 Increased	1	8.63 ( 0.78 - 95.15 )	8.63 ( 4.49 )	6.08 ( 0.82 )	2.61 ( 0.11 )
Po2 Decreased	1	1.08 ( 0.14 - 8.13 )	1.08 ( 0.01 )	1.07 ( 0.2 )	0.1 ( -2.05 )
Proteus Infection	1	0.59 ( 0.08 - 4.37 )	0.59 ( 0.27 )	0.61 ( 0.11 )	-0.72 ( -2.82 )
Injection Site Extravasation	1	1.92 ( 0.24 - 15.13 )	1.92 ( 0.39 )	1.83 ( 0.32 )	0.87 ( -1.35 )
Dialysis	1	0.16 ( 0.02 - 1.15 )	0.16 ( 4.33 )	0.17 ( 0.03 )	-2.56 ( -4.62 )
Staphylococcal Scalded Skin Syndrome	1	2.16 ( 0.27 - 17.24 )	2.16 ( 0.55 )	2.03 ( 0.36 )	1.02 ( -1.22 )
Renal Cyst	1	0.41 ( 0.06 - 2.98 )	0.41 ( 0.83 )	0.42 ( 0.08 )	-1.24 ( -3.32 )
Dermatitis Diaper	1	5.75 ( 0.6 - 55.3 )	5.75 ( 2.94 )	4.56 ( 0.69 )	2.19 ( -0.22 )
Coagulation Factor Xiii Level Decreased	1	17.25 ( 1.08 - 275.87 )	17.25 ( 7.66 )	9.13 ( 0.9 )	3.19 ( 0.56 )
Human T-Cell Lymphotropic Virus Type I Infection	1	5.75 ( 0.6 - 55.3 )	5.75 ( 2.94 )	4.56 ( 0.69 )	2.19 ( -0.22 )
Mallory-Weiss Syndrome	1	8.63 ( 0.78 - 95.15 )	8.63 ( 4.49 )	6.08 ( 0.82 )	2.61 ( 0.11 )
Hepatobiliary Disease	1	2.88 ( 0.35 - 23.89 )	2.88 ( 1.05 )	2.61 ( 0.44 )	1.38 ( -0.9 )
Pharyngeal Erythema	1	5.75 ( 0.6 - 55.3 )	5.75 ( 2.94 )	4.56 ( 0.69 )	2.19 ( -0.22 )
Growth Accelerated	1	Inf ( NaN - Inf )	Inf ( 17.25 )	18.25 ( 0 )	4.19 ( 1.3 )
Secondary Sexual Characteristics Absence	1	Inf ( NaN - Inf )	Inf ( 17.25 )	18.25 ( 0 )	4.19 ( 1.3 )
Cerebellar Ataxia	1	3.45 ( 0.4 - 29.54 )	3.45 ( 1.45 )	3.04 ( 0.5 )	1.61 ( -0.71 )
Small Intestinal Haemorrhage	1	1.73 ( 0.22 - 13.48 )	1.73 ( 0.28 )	1.66 ( 0.3 )	0.73 ( -1.47 )
Pigmentation Disorder	1	0.96 ( 0.13 - 7.18 )	0.96 ( 0 )	0.96 ( 0.18 )	-0.06 ( -2.2 )
Performance Status Decreased	1	4.31 ( 0.48 - 38.6 )	4.31 ( 2.04 )	3.65 ( 0.58 )	1.87 ( -0.49 )
Restlessness	1	0.29 ( 0.04 - 2.07 )	0.29 ( 1.74 )	0.3 ( 0.06 )	-1.74 ( -3.81 )
Subileus	1	2.88 ( 0.35 - 23.89 )	2.88 ( 1.05 )	2.61 ( 0.44 )	1.38 ( -0.9 )
Allogenic Bone Marrow Transplantation Therapy	1	4.31 ( 0.48 - 38.6 )	4.31 ( 2.04 )	3.65 ( 0.58 )	1.87 ( -0.49 )
Red Blood Cell Schistocytes Present	1	0.4 ( 0.06 - 2.91 )	0.4 ( 0.87 )	0.41 ( 0.08 )	-1.27 ( -3.35 )
Lip Pain	1	8.63 ( 0.78 - 95.15 )	8.63 ( 4.49 )	6.08 ( 0.82 )	2.61 ( 0.11 )
Lip Swelling	1	1.15 ( 0.15 - 8.71 )	1.15 ( 0.02 )	1.14 ( 0.21 )	0.19 ( -1.97 )
Drug Hypersensitivity	1	0.22 ( 0.03 - 1.55 )	0.22 ( 2.82 )	0.23 ( 0.04 )	-2.15 ( -4.22 )
Gastroenteritis Staphylococcal	1	17.25 ( 1.08 - 275.87 )	17.25 ( 7.66 )	9.13 ( 0.9 )	3.19 ( 0.56 )
Glossoptosis	1	5.75 ( 0.6 - 55.3 )	5.75 ( 2.94 )	4.56 ( 0.69 )	2.19 ( -0.22 )
Transfusion Reaction	1	3.45 ( 0.4 - 29.54 )	3.45 ( 1.45 )	3.04 ( 0.5 )	1.61 ( -0.71 )
Haemorrhagic Cerebral Infarction	1	2.46 ( 0.3 - 20.04 )	2.46 ( 0.76 )	2.28 ( 0.4 )	1.19 ( -1.07 )
Thrombocytopenic Purpura	1	1.01 ( 0.14 - 7.63 )	1.01 ( 0 )	1.01 ( 0.19 )	0.02 ( -2.13 )
Blood Product Transfusion Dependent	1	2.88 ( 0.35 - 23.89 )	2.88 ( 1.05 )	2.61 ( 0.44 )	1.38 ( -0.9 )
Speech Disorder Developmental	1	5.75 ( 0.6 - 55.3 )	5.75 ( 2.94 )	4.56 ( 0.69 )	2.19 ( -0.22 )
Cytomegalovirus Hepatitis	1	1.01 ( 0.14 - 7.63 )	1.01 ( 0 )	1.01 ( 0.19 )	0.02 ( -2.13 )
Pharyngitis Bacterial	1	8.63 ( 0.78 - 95.15 )	8.63 ( 4.49 )	6.08 ( 0.82 )	2.61 ( 0.11 )
Secondary Immunodeficiency	1	0.96 ( 0.13 - 7.18 )	0.96 ( 0 )	0.96 ( 0.18 )	-0.06 ( -2.2 )
Gastrointestinal Perforation	1	0.91 ( 0.12 - 6.78 )	0.91 ( 0.01 )	0.91 ( 0.17 )	-0.13 ( -2.27 )
Stress Ulcer	1	17.25 ( 1.08 - 275.87 )	17.25 ( 7.66 )	9.13 ( 0.9 )	3.19 ( 0.56 )
Brain Stem Haemorrhage	1	1.73 ( 0.22 - 13.48 )	1.73 ( 0.28 )	1.66 ( 0.3 )	0.73 ( -1.47 )
Atrial Tachycardia	1	2.88 ( 0.35 - 23.89 )	2.88 ( 1.05 )	2.61 ( 0.44 )	1.38 ( -0.9 )
Atrioventricular Block	1	0.72 ( 0.1 - 5.31 )	0.72 ( 0.11 )	0.73 ( 0.14 )	-0.45 ( -2.57 )
Reticulocyte Count Increased	1	0.62 ( 0.08 - 4.53 )	0.62 ( 0.23 )	0.63 ( 0.12 )	-0.67 ( -2.78 )
Hyperchloraemia	1	4.31 ( 0.48 - 38.6 )	4.31 ( 2.04 )	3.65 ( 0.58 )	1.87 ( -0.49 )
Immunosuppressant Drug Level Increased	1	0.04 ( 0 - 0.25 )	0.04 ( 26.27 )	0.04 ( 0.01 )	-4.74 ( -6.79 )
Gastritis	1	0.17 ( 0.02 - 1.25 )	0.17 ( 3.88 )	0.18 ( 0.04 )	-2.45 ( -4.51 )
Hepatitis Post Transfusion	1	Inf ( NaN - Inf )	Inf ( 17.25 )	18.25 ( 0 )	4.19 ( 1.3 )
Pupillary Reflex Impaired	1	0.91 ( 0.12 - 6.78 )	0.91 ( 0.01 )	0.91 ( 0.17 )	-0.13 ( -2.27 )
Angiopathy	1	0.48 ( 0.07 - 3.5 )	0.48 ( 0.55 )	0.49 ( 0.09 )	-1.02 ( -3.11 )
Feeling Hot	1	0.42 ( 0.06 - 3.06 )	0.42 ( 0.78 )	0.43 ( 0.08 )	-1.2 ( -3.29 )
Flail Chest	1	Inf ( NaN - Inf )	Inf ( 17.25 )	18.25 ( 0 )	4.19 ( 1.3 )
Wolff-Parkinson-White Syndrome	1	Inf ( NaN - Inf )	Inf ( 17.25 )	18.25 ( 0 )	4.19 ( 1.3 )
Dyspareunia	1	Inf ( NaN - Inf )	Inf ( 17.25 )	18.25 ( 0 )	4.19 ( 1.3 )
Uterine Haemorrhage	1	5.75 ( 0.6 - 55.3 )	5.75 ( 2.94 )	4.56 ( 0.69 )	2.19 ( -0.22 )
Vaginal Disorder	1	17.25 ( 1.08 - 275.87 )	17.25 ( 7.66 )	9.13 ( 0.9 )	3.19 ( 0.56 )
Vaginal Obstruction	1	17.25 ( 1.08 - 275.87 )	17.25 ( 7.66 )	9.13 ( 0.9 )	3.19 ( 0.56 )
Vulvovaginal Dryness	1	5.75 ( 0.6 - 55.3 )	5.75 ( 2.94 )	4.56 ( 0.69 )	2.19 ( -0.22 )
Biliary Tract Disorder	1	0.64 ( 0.09 - 4.7 )	0.64 ( 0.2 )	0.65 ( 0.12 )	-0.62 ( -2.73 )
Hepatic Vein Thrombosis	1	5.75 ( 0.6 - 55.3 )	5.75 ( 2.94 )	4.56 ( 0.69 )	2.19 ( -0.22 )
Liver Abscess	1	0.42 ( 0.06 - 3.06 )	0.42 ( 0.78 )	0.43 ( 0.08 )	-1.2 ( -3.29 )
Ileal Stenosis	1	5.75 ( 0.6 - 55.3 )	5.75 ( 2.94 )	4.56 ( 0.69 )	2.19 ( -0.22 )
Mesenteric Arteriosclerosis	1	17.25 ( 1.08 - 275.87 )	17.25 ( 7.66 )	9.13 ( 0.9 )	3.19 ( 0.56 )
Phlebitis	1	0.72 ( 0.1 - 5.31 )	0.72 ( 0.11 )	0.73 ( 0.14 )	-0.45 ( -2.57 )
Tuberculin Test Positive	1	17.25 ( 1.08 - 275.87 )	17.25 ( 7.66 )	9.13 ( 0.9 )	3.19 ( 0.56 )
Gallbladder Disorder	1	1.08 ( 0.14 - 8.13 )	1.08 ( 0.01 )	1.07 ( 0.2 )	0.1 ( -2.05 )
Metastases To Pleura	1	2.46 ( 0.3 - 20.04 )	2.46 ( 0.76 )	2.28 ( 0.4 )	1.19 ( -1.07 )
Oedema Mouth	1	4.31 ( 0.48 - 38.6 )	4.31 ( 2.04 )	3.65 ( 0.58 )	1.87 ( -0.49 )
Blindness Cortical	1	0.62 ( 0.08 - 4.53 )	0.62 ( 0.23 )	0.63 ( 0.12 )	-0.67 ( -2.78 )
Muscle Rigidity	1	1.01 ( 0.14 - 7.63 )	1.01 ( 0 )	1.01 ( 0.19 )	0.02 ( -2.13 )
Depression	1	0.13 ( 0.02 - 0.95 )	0.13 ( 5.63 )	0.14 ( 0.03 )	-2.84 ( -4.9 )
Gastric Ulcer	1	0.24 ( 0.03 - 1.72 )	0.24 ( 2.38 )	0.25 ( 0.05 )	-2 ( -4.07 )
Influenza Virus Test Positive	1	8.63 ( 0.78 - 95.15 )	8.63 ( 4.49 )	6.08 ( 0.82 )	2.61 ( 0.11 )
Fibrosis	1	0.51 ( 0.07 - 3.71 )	0.51 ( 0.46 )	0.52 ( 0.1 )	-0.94 ( -3.04 )
Duodenal Stenosis	1	Inf ( NaN - Inf )	Inf ( 17.25 )	18.25 ( 0 )	4.19 ( 1.3 )
Intracranial Hypotension	1	5.75 ( 0.6 - 55.3 )	5.75 ( 2.94 )	4.56 ( 0.69 )	2.19 ( -0.22 )
Immunosuppressant Drug Level Decreased	1	0.1 ( 0.01 - 0.7 )	0.1 ( 8.26 )	0.1 ( 0.02 )	-3.28 ( -5.33 )
Hyporeflexia	1	1.44 ( 0.19 - 11.06 )	1.44 ( 0.12 )	1.4 ( 0.25 )	0.49 ( -1.69 )
Effusion	1	1.23 ( 0.16 - 9.37 )	1.23 ( 0.04 )	1.22 ( 0.22 )	0.28 ( -1.88 )
Meningoencephalitis Amoebic	1	1.92 ( 0.24 - 15.13 )	1.92 ( 0.39 )	1.83 ( 0.32 )	0.87 ( -1.35 )
Csf Protein Increased	1	0.75 ( 0.1 - 5.55 )	0.75 ( 0.08 )	0.76 ( 0.14 )	-0.39 ( -2.52 )
Autonomic Nervous System Imbalance	1	0.96 ( 0.13 - 7.18 )	0.96 ( 0 )	0.96 ( 0.18 )	-0.06 ( -2.2 )
Quadriplegia	1	0.69 ( 0.09 - 5.09 )	0.69 ( 0.13 )	0.7 ( 0.13 )	-0.51 ( -2.63 )
Cerebral Haematoma	1	1.23 ( 0.16 - 9.37 )	1.23 ( 0.04 )	1.22 ( 0.22 )	0.28 ( -1.88 )
Plasmacytoma	1	0.75 ( 0.1 - 5.55 )	0.75 ( 0.08 )	0.76 ( 0.14 )	-0.39 ( -2.52 )
Central Obesity	1	5.75 ( 0.6 - 55.3 )	5.75 ( 2.94 )	4.56 ( 0.69 )	2.19 ( -0.22 )
Skin Striae	1	4.31 ( 0.48 - 38.6 )	4.31 ( 2.04 )	3.65 ( 0.58 )	1.87 ( -0.49 )
Drug Intolerance	1	0.19 ( 0.03 - 1.35 )	0.19 ( 3.48 )	0.2 ( 0.04 )	-2.35 ( -4.41 )
Dizziness	1	0.06 ( 0.01 - 0.46 )	0.06 ( 13.45 )	0.07 ( 0.01 )	-3.87 ( -5.92 )
Candida Pneumonia	1	1.01 ( 0.14 - 7.63 )	1.01 ( 0 )	1.01 ( 0.19 )	0.02 ( -2.13 )
Acinetobacter Test Positive	1	3.45 ( 0.4 - 29.54 )	3.45 ( 1.45 )	3.04 ( 0.5 )	1.61 ( -0.71 )
Leukodystrophy	1	8.63 ( 0.78 - 95.15 )	8.63 ( 4.49 )	6.08 ( 0.82 )	2.61 ( 0.11 )
Hypertrophic Cardiomyopathy	1	0.78 ( 0.11 - 5.82 )	0.78 ( 0.06 )	0.79 ( 0.15 )	-0.33 ( -2.46 )
Dysaesthesia	1	1.01 ( 0.14 - 7.63 )	1.01 ( 0 )	1.01 ( 0.19 )	0.02 ( -2.13 )
Extrapyramidal Disorder	1	1.92 ( 0.24 - 15.13 )	1.92 ( 0.39 )	1.83 ( 0.32 )	0.87 ( -1.35 )
Hyperreflexia	1	1.57 ( 0.2 - 12.15 )	1.57 ( 0.19 )	1.52 ( 0.27 )	0.61 ( -1.59 )
Loss Of Proprioception	1	5.75 ( 0.6 - 55.3 )	5.75 ( 2.94 )	4.56 ( 0.69 )	2.19 ( -0.22 )
Motor Dysfunction	1	1.08 ( 0.14 - 8.13 )	1.08 ( 0.01 )	1.07 ( 0.2 )	0.1 ( -2.05 )
Muscle Disorder	1	3.45 ( 0.4 - 29.54 )	3.45 ( 1.45 )	3.04 ( 0.5 )	1.61 ( -0.71 )
Muscle Spasticity	1	1.44 ( 0.19 - 11.06 )	1.44 ( 0.12 )	1.4 ( 0.25 )	0.49 ( -1.69 )
Neurological Symptom	1	0.32 ( 0.04 - 2.31 )	0.32 ( 1.42 )	0.33 ( 0.06 )	-1.59 ( -3.67 )
Paraparesis	1	1.44 ( 0.19 - 11.06 )	1.44 ( 0.12 )	1.4 ( 0.25 )	0.49 ( -1.69 )
Sensory Disturbance	1	1.33 ( 0.17 - 10.15 )	1.33 ( 0.07 )	1.3 ( 0.24 )	0.38 ( -1.79 )
Spinal Disorder	1	2.88 ( 0.35 - 23.89 )	2.88 ( 1.05 )	2.61 ( 0.44 )	1.38 ( -0.9 )
Orthostatic Hypotension	1	0.58 ( 0.08 - 4.22 )	0.58 ( 0.3 )	0.59 ( 0.11 )	-0.76 ( -2.87 )
Hyperlactacidaemia	1	17.25 ( 1.08 - 275.87 )	17.25 ( 7.66 )	9.13 ( 0.9 )	3.19 ( 0.56 )
Abnormal Behaviour	1	0.59 ( 0.08 - 4.37 )	0.59 ( 0.27 )	0.61 ( 0.11 )	-0.72 ( -2.82 )
Lung Infiltration	1	0.11 ( 0.02 - 0.81 )	0.11 ( 6.88 )	0.12 ( 0.02 )	-3.07 ( -5.12 )
Methylobacterium Infection	1	17.25 ( 1.08 - 275.87 )	17.25 ( 7.66 )	9.13 ( 0.9 )	3.19 ( 0.56 )
Heart Transplant Rejection	1	0.19 ( 0.03 - 1.33 )	0.19 ( 3.54 )	0.19 ( 0.04 )	-2.36 ( -4.43 )
Karyotype Analysis Abnormal	1	17.25 ( 1.08 - 275.87 )	17.25 ( 7.66 )	9.13 ( 0.9 )	3.19 ( 0.56 )
Aborted Pregnancy	1	Inf ( NaN - Inf )	Inf ( 17.25 )	18.25 ( 0 )	4.19 ( 1.3 )
Neoplasm Progression	1	0.21 ( 0.03 - 1.47 )	0.21 ( 3.04 )	0.21 ( 0.04 )	-2.22 ( -4.28 )
Hepatic Neoplasm	1	1.08 ( 0.14 - 8.13 )	1.08 ( 0.01 )	1.07 ( 0.2 )	0.1 ( -2.05 )
Micrognathia	1	Inf ( NaN - Inf )	Inf ( 17.25 )	18.25 ( 0 )	4.19 ( 1.3 )
Tooth Erosion	1	17.25 ( 1.08 - 275.87 )	17.25 ( 7.66 )	9.13 ( 0.9 )	3.19 ( 0.56 )
Haemorrhagic Infarction	1	5.75 ( 0.6 - 55.3 )	5.75 ( 2.94 )	4.56 ( 0.69 )	2.19 ( -0.22 )
Serratia Test Positive	1	Inf ( NaN - Inf )	Inf ( 17.25 )	18.25 ( 0 )	4.19 ( 1.3 )
Lymphadenopathy	1	0.1 ( 0.01 - 0.68 )	0.1 ( 8.55 )	0.1 ( 0.02 )	-3.32 ( -5.37 )
